# Supplementary material
Source: MDPI journal article supplement (https://www.mdpi.com/2073-4395/12/7/1588)
Supplement: s1 [file s1]

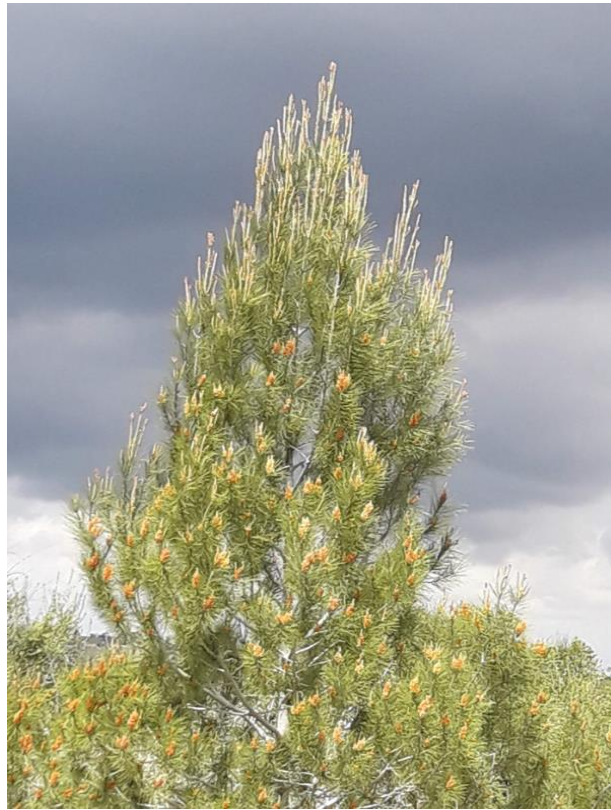

**Supplementary Figure S1.** *P. halepensis* tree with male and female cones. Spatial segregation of male and female cones is apparent. Clusters of male cone are located at the middle and lower crown, while female cones are at the upper crown. Picture was taken by Dr. Rakefet David-Schwartz.

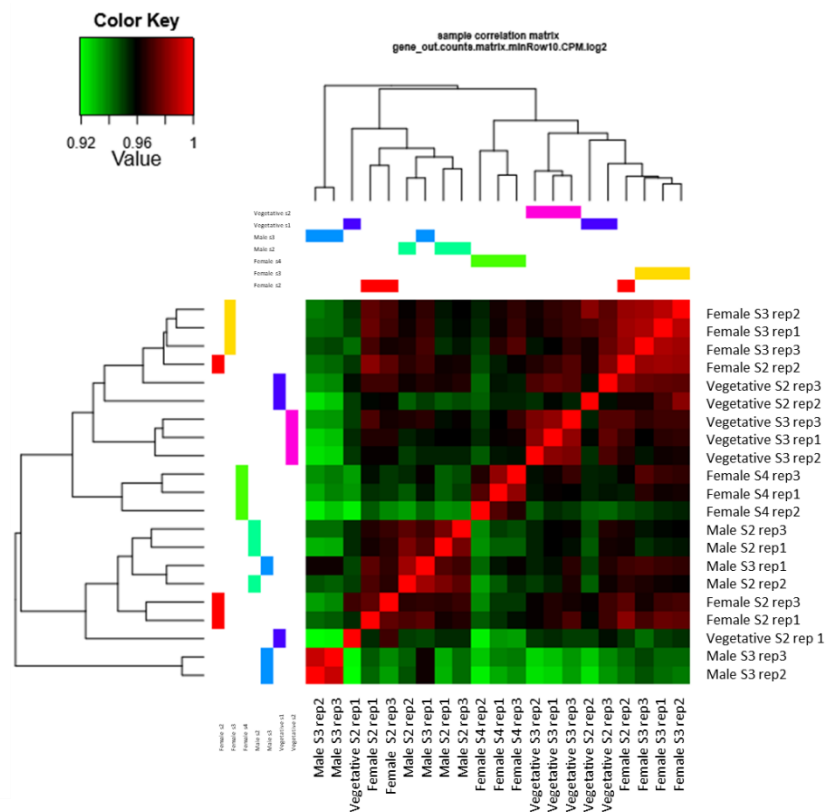

**Supplementary Figure S2.** Heatmap of Pearson correlation analysis evaluating similarity between samples. The closer the correlation coefficient is to 1, the greater the similarity of the samples. Male stage 3 replicate 1, Female stage 2 replicate 2 and Vegetative stage 1 replicate 1 are at separate clusters.

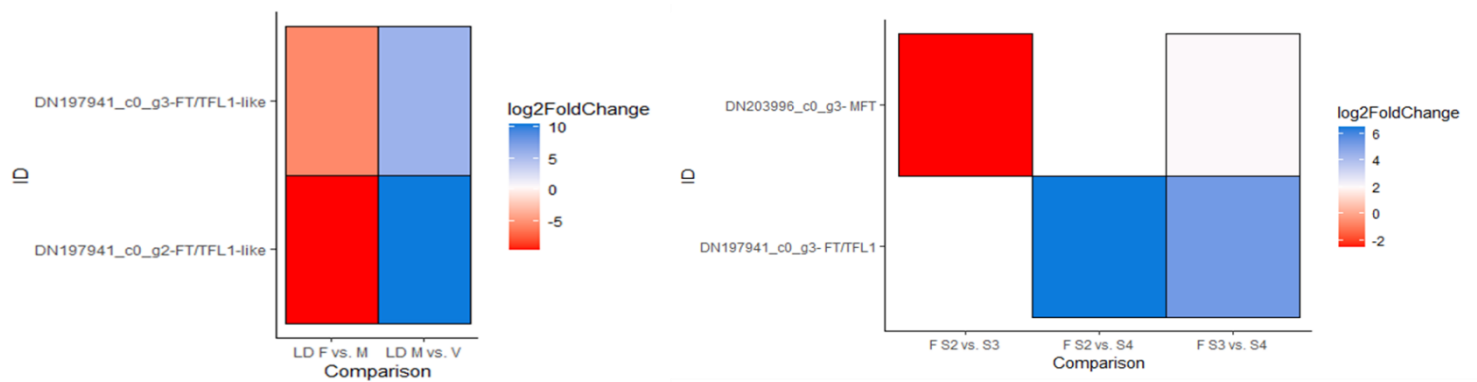

**Supplementary Figure S3.** Differential expression of FT/TFL1 homologs between different developmental stages of the male (A) and female (B) cones. S, developmental stage; M, male; V, vegetative; F, female; S, developmental stage. Gene ID is composed of the TRINITY accession ID, followed by NCBI BLASTP derived homolog gene. Full DE list is provided in Supplementary Table 1.



**Supplementary Table S1. Primers that were used in the qPCR analysis:**

| ID                         | Annotation                                 | Forward primer sequences | Reverse primer sequences |
|----------------------------|--------------------------------------------|--------------------------|--------------------------|
| TRINITY_DN191281_c0_g1_i4  | AGL66                                      | AGGCCGAGTACTACGAGAGG     | GTGCTTGCACCGTTTGGATT     |
| TRINITY_DN202447_c2_g4_i1  | DAL3                                       | AGGAAAGGGCGTGGTGATTT     | TCACTGTCTTCGATACGGCTG    |
| TRINITY_DN202447_c2_g1_i7  | DAL3                                       | GACCAGCAGGCAGGTTACTT     | CCACTTCCGCATCACAGAGT     |
| TRINITY_DN203580_c1_g2_i4  | MADS2                                      | TGAGGCGTGGA AAAAATGGGA   | AGCAACCTGGGCATTACACA     |
| TRINITY_DN199302_c0_g1_i1  | DAL11                                      | TCAATGGGGAGGGGGAAGAT     | AAGACCTCCTTTCGCTTGG      |
| TRINITY_DN204057_c1_g2_i1  | DAL13                                      | TCGACAAGGCAGCAACTCAA     | ACGCATCTTGTTCTTCGCT      |
| TRINITY_DN192084_c1_g2_i1  | DAL14                                      | TCTATGAGTTCGGAAGCGCC     | CCAATTCTGTGCCTCCCGAT     |
| TRINITY_DN192761_c1_g1_i2  | MADS1                                      | TCGAGCAGGAGTATAGGCGA     | GAACCTCGGCCATTTGTTG      |
| TRINITY_DN211306_c5_g2_i14 | GbMADS5                                    | GCACTCTGATCGCTTTGTGC     | ATGGGCGTAGTTTGTGTGGT     |
| TRINITY_DN211436_c2_g2_i2  | E3<br>ubiquitin-<br>protein<br>ligase UPL6 | TACTGCCTCGGCCTCTTTTG     | CAGCAGCCTCCCATTTTGTG     |

**Supplementary Table S3.** Selected *P. halepensis* MADS-box genes and their expression patterns. Eight MADS-box genes were chosen to be further characterized for their expression patterns using qPCR (Figure 7). These genes were chosen due to their potential role in cone development reflected by their up – regulation in relation to vegetative meristems at least at one developmental stage.

| Gene name       | Closest protein BLAST homology                    | Arabidopsis protein with the highest alignment score | Down regulated                            | Up regulated                                                            | Estimated role in reproductive development                              |
|-----------------|---------------------------------------------------|------------------------------------------------------|-------------------------------------------|-------------------------------------------------------------------------|-------------------------------------------------------------------------|
| <i>PhDAL3.1</i> | 67% - <i>DAL3</i> ( <i>Picea abies</i> ).         | <i>CAL1, AGL10</i><br>E Value = 5e-13                | -----<br>-----                            | FS2 vs. VS1<br>MS2 vs. VS1<br>FS2 vs. FS3<br>FS2 vs. FS4<br>MS2 vs. MS3 | Early specification of both cone types.                                 |
| <i>PhDAL3.2</i> | 80% <i>DAL3</i> ( <i>Picea Abies</i> ).           | <i>AGL20, SOC1</i><br>E Value = 1e-47                | -----<br>-----                            | FS2 vs. VS1<br>MS2 vs. VS1<br>FS2 vs. FS3<br>FS2 vs. FS4<br>MS2 vs. MS3 | Early specification of both cone types.                                 |
| <i>PhMADS2</i>  | 96.6% <i>MADS2</i> ( <i>Pinus tabuliformis</i> ). | <i>PI</i><br>E Value = 3e-39                         | FS2 vs. MS2<br>FS3 vs. MS3<br>FS2 vs. FS3 | MS2 vs. VS1<br>FS3 vs. VS2<br>MS3 vs. VS2<br>FS3 vs. FS4<br>MS2 vs. MS3 | Development of both cone types, mostly in male cones at an early stage. |
| <i>PhDAL11</i>  | 97% <i>DAL11</i> ( <i>Pinus tabuliformis</i> ).   | TT16, ABS, AGL32<br>E Value = 3e-36                  | FS2 vs. MS2<br>FS3 vs. MS3                | MS2 vs. VS1<br>MS3 vs. VS2                                              | Male cones development.                                                 |
| <i>PhDAL13</i>  | 99% <i>DAL13</i> ( <i>Pinus tabuliformis</i> ).   | PI<br>E Value = 1e-39                                | FS2 vs. MS2<br>FS3 vs. MS3<br>FS3 vs. VS2 | MS2 vs. VS1<br>MS3 vs. VS2                                              | Male cones development.                                                 |
| <i>PhDAL14</i>  | 100% <i>DAL14</i> ( <i>Pinus tabuliformis</i> ).  | AGL6, RSB1<br>E Value = 2e-87                        | FS2 vs. FS3<br>FS2 vs. FS4<br>MS2 vs. MS3 | FS3 vs. MS3<br>FS3 vs. VS2<br>MS3 vs. VS2                               | Late development of both cone types - especially the female cone.       |
| <i>PhMADS1</i>  | 97% <i>MADS1</i> ( <i>Pinus tabuliformis</i> ).   | <i>AP1, AtAP1, AGL7</i><br>E Value = 2e-32           | -----<br>-----                            | FS3 vs. MS3<br>FS3 vs. VS2<br>FS3 vs. FS4<br>FS2 vs. FS4                | Female cone development – from an early stage.                          |
| <i>PhMADS5</i>  | 43% <i>GbMADS5</i> ( <i>Gingko biloba</i> )       | <i>AGL22, FAQ1, SVP</i><br>E Value = 2e-33           | FS2 vs. FS3                               | FS3 vs. MS3<br>FS3 vs. VS2<br>FS3 vs. FS4<br>MS2 vs. MS3                | Female cone late development.                                           |

F – Female, M – Male, V – Vegetative, S – Developmental stage.
