# Supplementary material
Source: MDPI journal article supplement (https://www.mdpi.com/2073-4395/12/7/1588)
Supplement: s1 [file s1]

Archive with 2 entries (2 files):
- agronomy-1601474-supplementary.pdf
- SUPP Table S2.xlsx
