# Supplementary material
Source: MDPI journal article supplement (https://www.mdpi.com/2073-4395/12/7/1588)
Supplement: s1 [file s1 › SUPP Table S2.xlsx]

## Sheet: FS2 vs FS3
Supplementary Table 2a: Transcriptome analysis of Pinus halepensis female cone development. Differentialy expressed genes in developmental stage 2 versus stage 3.
Contig ID	Blast Top Hit Taxonomy	Name	GO Ids	GO Terms	EC #	EC desc	baseMean	log2FoldChange	pvalue	padj	female_s2_rep1	female_s2_rep2	female_s2_rep3	female_s3_rep1	female_s3_rep2	female_s3_rep3
TRINITY_DN212004_c0_g5	Pinus pinea	AIN43964.1 dehydrin	P:GO:0009415	P:response to water			12148.3	2.84466	1.18582e-70	6.65287e-67	5375.21	2907.36	5098.12	907.128	840.498	698.653
TRINITY_DN203366_c0_g1	Pinus contorta	M4HY05.1RecName: Full=Bifunctional levopimaradiene synthase, chloroplastic; Short=PcLAS1; AltName: Full=Diterpene synthase; Includes: RecName: Full=Levopimaradiene synthase; AltName: Full=Abieta-7,13-diene synthase; AltName: Full=Neoabietadiene synthase; Includes: RecName: Full=Copalyl diphosphate synthase; Flags: Precursor	P:GO:0006952; P:GO:0008152; F:GO:0000287; F:GO:0010333; F:GO:0050554; F:GO:0050559; F:GO:0052678; C:GO:0009507	P:defense response; P:metabolic process; F:magnesium ion binding; F:terpene synthase activity; F:abietadiene synthase activity; F:copalyl diphosphate synthase activity; F:levopimaradiene synthase activity; C:chloroplast	EC:4.2.3.32; EC:5.5.1.12; EC:4.2.3.18	Levopimaradiene synthase; Copalyl diphosphate synthase; Abieta-7,13-diene synthase	223.4	5.92696	1.59434e-48	3.35429e-45	60.983	8.807	71.781	2.006	0.566	0.781
TRINITY_DN213682_c1_g5							266.316	2.54846	3.01326e-46	5.63513e-43	29.473	16.333	27.197	4.934	4.966	5.225
TRINITY_DN211169_c1_g2	Picea sitchensis	XP_021639808.1nuclear transcription factor Y subunit C-2-like	P:GO:0006355; F:GO:0000978; F:GO:0046982; C:GO:0005634	P:regulation of transcription, DNA-templated; F:RNA polymerase II proximal promoter sequence-specific DNA binding; F:protein heterodimerization activity; C:nucleus			451.23	3.90057	3.38276e-44	5.17594e-41	51.983	29.185	45.465	4.638	3.114	2.454
TRINITY_DN210062_c1_g1	Ginkgo biloba	BAE48515.1AINTEGUMENTA-like protein	P:GO:0006355; F:GO:0003677; F:GO:0003700; C:GO:0005634	P:regulation of transcription, DNA-templated; F:DNA binding; F:DNA-binding transcription factor activity; C:nucleus			1756.78	1.67399	1.81387e-38	2.18066e-35	80.805	48.08	91.333	29.81	26.787	27.187
TRINITY_DN215313_c6_g5	Quercus suber	XP_023879203.1aquaporin PIP2-2-like	P:GO:0055085; F:GO:0015267; C:GO:0016021	P:transmembrane transport; F:channel activity; C:integral component of membrane			9206.63	1.20428	8.5899e-38	9.03604e-35	1421.89	893.41	1502.25	649.125	697.294	628.031
TRINITY_DN201502_c0_g1	Pinus pinaster	AIN43972.1 dehydrin					438.603	3.28554	3.4164e-31	2.39589e-28	107.709	187.408	196.268	14.998	17.964	15.142
TRINITY_DN212871_c2_g2	Pinus taeda	AFG71163.1hypothetical protein 0_13804_01, partial	P:GO:0006355	P:regulation of transcription, DNA-templated			1032.07	1.38315	1.29561e-30	8.07647e-28	102.228	88.068	116.364	43.854	46.331	44.722
TRINITY_DN203795_c0_g1	Nelumbo nucifera	XP_010277632.1 protein TIME FOR COFFEE-like isoform X1	P:GO:0042752; C:GO:0005634	P:regulation of circadian rhythm; C:nucleus			822.367	2.0284	6.86449e-30	3.72697e-27	32.821	27.306	39.516	8.442	8.587	10.458
TRINITY_DN200474_c0_g3							228.238	2.09279	1.06838e-28	5.44906e-26	61.121	36.572	57.382	15.469	13.505	14.61
TRINITY_DN209303_c2_g2							342.569	2.11117	4.86477e-27	2.15471e-24	33.258	17.421	36.719	7.554	8.528	12.131
TRINITY_DN207899_c3_g10							293.281	2.93757	5.23833e-27	2.26067e-24	68.159	73.56	103.231	11.917	12.656	11.247
TRINITY_DN213829_c1_g1	Amborella trichopoda	XP_020521377.1potassium channel AKT1	P:GO:0006810; F:GO:0015075; F:GO:0015267	P:transport; F:ion transmembrane transporter activity; F:channel activity			109.496	3.20506	1.79519e-26	7.36947e-24	9.885	4.313	12.07	3.245	2.949	2.617
TRINITY_DN211806_c2_g3	Marchantia polymorpha subsp. ruderalis/Marchantia polymorpha	ADB22517.1protein phosphtase 2C	F:GO:0003824	F:catalytic activity			1245.65	1.46768	1.31334e-25	4.70314e-23	131.615	108.029	125.264	51.693	49.351	42.629
TRINITY_DN215486_c3_g1	Pinus banksiana	Q50EK5.1RecName: Full=Cytochrome P450 720B2; AltName: Full=Cytochrome P450 CYPB	P:GO:0055114; F:GO:0004497; F:GO:0005506; F:GO:0016705; F:GO:0020037; C:GO:0016021	P:oxidation-reduction process; F:monooxygenase activity; F:iron ion binding; F:oxidoreductase activity, acting on paired donors, with incorporation or reduction of molecular oxygen; F:heme binding; C:integral component of membrane			358.229	2.86172	2.86433e-25	9.64192e-23	92.098	15.03	145.247	19.877	14.897	16.892
TRINITY_DN210762_c0_g1	Taxus wallichiana var. chinensis	AEW91475.19-cis-epoxycarotenoid dioxygenase	P:GO:0016121; P:GO:0055114; F:GO:0010436; F:GO:0046872; C:GO:0009570	P:carotene catabolic process; P:oxidation-reduction process; F:carotenoid dioxygenase activity; F:metal ion binding; C:chloroplast stroma	EC:1.13.11	Acting on single donors with incorporation of molecular oxygen (oxygenases). The oxygen incorporated need not be derived from O(2)	222.938	5.96733	3.26288e-24	1.01699e-21	14.577	7.334	36.374	0.899	0.389	0.3
TRINITY_DN214663_c0_g5	Acinetobacter baumannii	WP_082181564.1thiazole biosynthesis enzyme	P:GO:0009228; P:GO:0052837; F:GO:0005506; F:GO:0016763; C:GO:0005829; C:GO:0009570	P:thiamine biosynthetic process; P:thiazole biosynthetic process; F:iron ion binding; F:transferase activity, transferring pentosyl groups; C:cytosol; C:chloroplast stroma			10238.6	1.21095	3.53259e-23	1.02512e-20	2290.5	1247.61	1867.86	915.591	903.225	914.818
TRINITY_DN141873_c0_g1	Pinus canariensis	AJA90785.1DNA-directed RNA polymerase IV fifth largest subunit	P:GO:0006351; F:GO:0003677; F:GO:0003899; C:GO:0042025; C:GO:0055029	P:transcription, DNA-templated; F:DNA binding; F:DNA-directed 5'-3' RNA polymerase activity; C:host cell nucleus; C:nuclear DNA-directed RNA polymerase complex	EC:2.7.7.6	DNA-directed RNA polymerase	247.562	1.84099	6.58078e-23	1.84602e-20	48.517	35.782	46.998	14.549	12.078	12.86
TRINITY_DN215313_c6_g3	Picea sitchensis	AAX92685.1probable aquaporin	P:GO:0055085; F:GO:0015267; C:GO:0016021	P:transmembrane transport; F:channel activity; C:integral component of membrane			1503.11	1.3305	3.64342e-22	9.58163e-20	1044.13	640.705	1213.57	456.365	457.628	379.834
TRINITY_DN211758_c6_g1							94.3032	4.34385	1.21701e-21	3.05724e-19	36.223	4.547	28.662	3.245	1.227	1.604
TRINITY_DN213564_c4_g1	Sesamum indicum	XP_011084620.1heat stress transcription factor A-1-like	P:GO:0061408; F:GO:0000978; F:GO:0003700; C:GO:0005634	P:positive regulation of transcription from RNA polymerase II promoter in response to heat stress; F:RNA polymerase II proximal promoter sequence-specific DNA binding; F:DNA-binding transcription factor activity; C:nucleus			185.541	2.16086	1.2813e-21	3.17141e-19	6.505	3.288	7.376	1.634	1.451	1.518
TRINITY_DN207248_c1_g1							188.579	11.4431	1.31828e-20	3.08166e-18	76.327	0	45.532	0	0	0
TRINITY_DN201181_c0_g1							157.934	11.1844	1.36781e-20	3.15363e-18	48.261	0	53.014	0	0	0
TRINITY_DN203713_c0_g1	Nelumbo nucifera	GAV59482.1DUF761 domain-containing protein/DUF4408 domain-containing protein	C:GO:0016020; C:GO:0016021	C:membrane; C:integral component of membrane			176.071	1.83191	1.81078e-20	4.11854e-18	19.823	10.056	19.648	5.833	5.556	5.679
TRINITY_DN203286_c0_g1							60.9599	5.91086	3.05426e-20	6.76398e-18	17.328	7.985	20.395	0.614	0.248	0.137
TRINITY_DN215313_c6_g6	Picea abies	AAX92683.1probable aquaporin	P:GO:0006833; P:GO:0009737; P:GO:0030001; P:GO:0055085; F:GO:0005515; F:GO:0015250; F:GO:0046872; C:GO:0005773; C:GO:0005886; C:GO:0009506; C:GO:0016021	P:water transport; P:response to abscisic acid; P:metal ion transport; P:transmembrane transport; F:protein binding; F:water channel activity; F:metal ion binding; C:vacuole; C:plasma membrane; C:plasmodesma; C:integral component of membrane			11079	1.27859	8.06343e-20	1.73994e-17	3985.24	1949.94	3198.96	1510.22	1468.19	1417.24
TRINITY_DN206639_c0_g1							104.633	3.99111	2.40615e-19	4.82119e-17	23.331	1.441	11.457	1.195	1.156	1.012
TRINITY_DN204587_c0_g3							17459.9	2.1393	3.2607e-19	6.38149e-17	3418.15	1873.8	5142.97	914.517	1217.9	816.528
TRINITY_DN211576_c0_g13	Pinus tabuliformis	AJP06318.1LRK1	P:GO:0006468; F:GO:0004672; F:GO:0005524; C:GO:0016020; C:GO:0016021	P:protein phosphorylation; F:protein kinase activity; F:ATP binding; C:membrane; C:integral component of membrane			60.1359	3.99538	1.0857e-18	2.03037e-16	26.125	14.603	22.972	2.072	2.1	0.995
TRINITY_DN215060_c6_g3	Pinus banksiana	Q50EK5.1RecName: Full=Cytochrome P450 720B2; AltName: Full=Cytochrome P450 CYPB	P:GO:0055114; F:GO:0004497; F:GO:0005506; F:GO:0016705; F:GO:0020037; C:GO:0016021	P:oxidation-reduction process; F:monooxygenase activity; F:iron ion binding; F:oxidoreductase activity, acting on paired donors, with incorporation or reduction of molecular oxygen; F:heme binding; C:integral component of membrane			187.405	2.98534	1.64334e-18	2.97408e-16	85.678	11.166	151.934	20.677	13.753	14.704
TRINITY_DN204263_c0_g2	Marchantia polymorpha	XP_024390961.1squamosa promoter-binding-like protein 14	F:GO:0003677; F:GO:0046872; C:GO:0005634; C:GO:0042025	F:DNA binding; F:metal ion binding; C:nucleus; C:host cell nucleus			1087.23	1.04186	5.95044e-17	9.44829e-15	43.399	34.352	47.295	24.339	21.856	21.731
TRINITY_DN209016_c1_g2	Picea sitchensis	ADE76989.1unknown	P:GO:0006355; F:GO:0003677	P:regulation of transcription, DNA-templated; F:DNA binding			332.463	1.39706	1.12825e-16	1.71077e-14	60.759	67.604	58.848	25.863	22.482	22.932
TRINITY_DN206286_c0_g1	Picea sitchensis	XP_011083551.1gibberellin-regulated protein 1					3535.94	1.56793	1.33637e-16	2.00825e-14	628.913	556.715	742.77	202.89	193.334	288.759
TRINITY_DN210677_c1_g1							63.9483	3.74368	2.0531e-16	3.00484e-14	31.499	2.05	21.123	1.82	1.191	1.107
TRINITY_DN210465_c2_g3	Selaginella moellendorffii	XP_024532017.1kinesin-like protein KIN-UA isoform X1	P:GO:0007018; P:GO:0030705; F:GO:0008017; F:GO:0008574; C:GO:0005871; C:GO:0005874	P:microtubule-based movement; P:cytoskeleton-dependent intracellular transport; F:microtubule binding; F:ATP-dependent microtubule motor activity, plus-end-directed; C:kinesin complex; C:microtubule	EC:3.6.1.3; EC:5.6.1.3; EC:3.6.1.15	Adenosinetriphosphatase; Plus-end-directed kinesin ATPase; Nucleoside-triphosphate phosphatase	104.924	2.38448	4.09978e-16	5.75029e-14	5.673	4.494	6.16	0.965	1.392	1.141
TRINITY_DN212501_c0_g2	Picea sitchensis	AAQ57134.1putative NBS-LRR protein G8029	P:GO:0007165; F:GO:0043531	P:signal transduction; F:ADP binding			120.832	2.18696	5.4403e-16	7.56742e-14	8.413	3.843	8.689	2.061	3.373	2.805
TRINITY_DN207821_c1_g4	Elaeis guineensis	XP_019709721.1 P-loop NTPase domain-containing protein LPA1-like	F:GO:0016787	F:hydrolase activity			489.021	2.33316	8.69476e-16	1.1523e-13	26.231	18.008	42.093	7.247	8.032	5.362
TRINITY_DN200337_c0_g3							834.416	2.64626	1.17916e-15	1.5505e-13	252.29	191.101	216.414	49.654	44.314	23.386
TRINITY_DN202447_c2_g1	Picea abies	CAA55868.1DAL3 protein	P:GO:0045944; F:GO:0000977; F:GO:0003700; F:GO:0046983; C:GO:0005634	P:positive regulation of transcription by RNA polymerase II; F:RNA polymerase II regulatory region sequence-specific DNA binding; F:DNA-binding transcription factor activity; F:protein dimerization activity; C:nucleus			100.928	3.91879	1.25157e-15	1.63296e-13	56.067	9.02	37.868	4.747	3.255	1.673
TRINITY_DN207371_c1_g3	Marchantia polymorpha	BAF79943.1receptor-like kinase	P:GO:0000186; P:GO:0006470; P:GO:0009556; P:GO:0010234; P:GO:0046777; P:GO:0055114; F:GO:0004709; F:GO:0004721; F:GO:0005524; F:GO:0032440; C:GO:0005886; C:GO:0016021	P:activation of MAPKK activity; P:protein dephosphorylation; P:microsporogenesis; P:anther wall tapetum cell fate specification; P:protein autophosphorylation; P:oxidation-reduction process; F:MAP kinase kinase kinase activity; F:phosphoprotein phosphatase activity; F:ATP binding; F:2-alkenal reductase [NAD(P)+] activity; C:plasma membrane; C:integral component of membrane	EC:2.7.11.25; EC:2.7.11; EC:1.3.1.74; EC:3.1.3.16	Mitogen-activated protein kinase kinase kinase; Transferring phosphorus-containing groups; 2-alkenal reductase (NAD(P)(+)); Protein-serine/threonine phosphatase	2964.54	1.01051	1.46962e-15	1.90271e-13	92.386	80.552	108.873	51.517	52.052	50.564
TRINITY_DN212044_c2_g1	Asparagus officinalis	XP_020251524.1lipid phosphate phosphatase epsilon 2, chloroplastic-like isoform X1	P:GO:0008152; P:GO:0009987; F:GO:0016787; C:GO:0016020	P:metabolic process; P:cellular process; F:hydrolase activity; C:membrane			115.697	2.97964	2.3718e-15	2.93528e-13	29.185	10.547	18.814	3.739	3.586	2.196
TRINITY_DN195154_c0_g1	Cinnamomum micranthum f. kanehirae	RWR88642.1auxin-responsive protein SAUR71	P:GO:0009733	P:response to auxin			361.135	1.29094	5.01468e-15	5.9438e-13	49.946	40.49	52.554	19.636	20.205	24.441
TRINITY_DN215549_c3_g1	Oryza sativa Japonica Group	FAA01221.1TPA: polyprotein	F:GO:0003676; F:GO:0003723; F:GO:0008270	F:nucleic acid binding; F:RNA binding; F:zinc ion binding			10971.6	1.13478	8.63532e-15	9.75444e-13	234.451	205.267	273.691	101.73	132.695	124.798
TRINITY_DN214623_c2_g1	Acinetobacter baumannii	Q40854.1RecName: Full=Metallothionein-like protein EMB30	F:GO:0046872	F:metal ion binding			681.263	1.03004	3.19601e-14	3.47046e-12	734.19	647.899	832.771	321.01	379.863	347.242
TRINITY_DN214839_c0_g2	Elaeis guineensis	XP_010919571.1 WAT1-related protein At5g47470	P:GO:0055085; F:GO:0022857; C:GO:0005886; C:GO:0016021	P:transmembrane transport; F:transmembrane transporter activity; C:plasma membrane; C:integral component of membrane			376.646	1.19698	3.3818e-14	3.64866e-12	44.689	26.751	35.148	16.851	18.389	21.199
TRINITY_DN10726_c0_g1	Picea sitchensis	XP_006858056.1transmembrane protein 97 isoform X2	C:GO:0016021	C:integral component of membrane			52.9265	9.61203	7.11054e-14	7.29741e-12	13.585	0	7.539	0	0	0
TRINITY_DN208590_c1_g2	Pinus taeda	RDX81189.1putative aspartyl protease	P:GO:0006508; F:GO:0004190	P:proteolysis; F:aspartic-type endopeptidase activity	EC:3.4.23	Acting on peptide bonds (peptidases)	297.206	1.24861	7.56464e-14	7.66991e-12	104.04	108.296	110.396	48.776	52.712	49.518
TRINITY_DN202107_c1_g1	Acinetobacter baumannii	WP_082181609.1YqaE/Pmp3 family membrane protein	C:GO:0016020; C:GO:0016021	C:membrane; C:integral component of membrane			2248.15	1.17867	8.3567e-14	8.32258e-12	388.448	253.314	483.084	193.33	191.506	238.487
TRINITY_DN205214_c1_g4							128.336	1.93884	9.41707e-14	9.32345e-12	22.318	10.963	27.12	6.896	7.006	5.654
TRINITY_DN43671_c0_g1	Prunus persica	XP_020416396.1beta-fructofuranosidase, cell wall isozyme	P:GO:0008152; F:GO:0004553	P:metabolic process; F:hydrolase activity, hydrolyzing O-glycosyl compounds			337.683	1.23611	1.39961e-13	1.36958e-11	179.514	144.698	193.845	75.483	85.019	70.751
TRINITY_DN209295_c3_g4							81.4364	3.75962	1.41666e-13	1.37825e-11	96	4.91	52.286	7.422	3.975	4.821
TRINITY_DN208780_c0_g1	Picea sitchensis	ABR17457.1unknown					683.467	1.15213	1.52552e-13	1.4672e-11	52.857	57.858	47.985	24.306	24.982	20.813
TRINITY_DN200541_c0_g1	Pinus massoniana	AIL50244.1putative auxin-repressed protein					3768.84	2.10061	1.8785e-13	1.77624e-11	630.811	825.315	1120.47	194.294	259.257	165.342
TRINITY_DN192084_c1_g4	Picea sitchensis	AGC10825.1MADS-box transcription factor	P:GO:0045944; F:GO:0000977; F:GO:0000981; F:GO:0008134; F:GO:0046983; C:GO:0005634; C:GO:0016021	P:positive regulation of transcription by RNA polymerase II; F:RNA polymerase II regulatory region sequence-specific DNA binding; F:DNA-binding transcription factor activity, RNA polymerase II-specific; F:transcription factor binding; F:protein dimerization activity; C:nucleus; C:integral component of membrane			86.558	2.14248	2.51681e-13	2.34035e-11	10.215	7.355	9.493	2.269	2.56	2.033
TRINITY_DN214692_c0_g1	Artemisia annua	PWA86611.1gag-pol polyprotein	P:GO:0006508; P:GO:0015074; F:GO:0003676; F:GO:0004190; F:GO:0008270; C:GO:0005739	P:proteolysis; P:DNA integration; F:nucleic acid binding; F:aspartic-type endopeptidase activity; F:zinc ion binding; C:mitochondrion			430.665	1.64993	5.72072e-13	5.09446e-11	24.834	22.118	29.572	8.815	10.132	9.488
TRINITY_DN209932_c0_g2	Picea sitchensis	ABR16463.1unknown					56.8817	3.68844	7.65114e-13	6.63795e-11	8.36	7.355	10.93	1.875	1.923	1.218
TRINITY_DN205637_c1_g1	Picea sitchensis	AEJ87846.1stearoyl-ACP desaturase	P:GO:0006633; P:GO:0055114; F:GO:0045300; F:GO:0046872; C:GO:0009570	P:fatty acid biosynthetic process; P:oxidation-reduction process; F:acyl-[acyl-carrier-protein] desaturase activity; F:metal ion binding; C:chloroplast stroma	EC:1.14.19.2; EC:1.14.19	Stearoyl-[acyl-carrier-protein] 9-desaturase; Acting on paired donors, with incorporation or reduction of molecular oxygen. The oxygen incorporated need not be derived from O(2)	82.2478	3.66227	8.46866e-13	7.30954e-11	32.704	9.18	22.426	2.489	3.196	0.961
TRINITY_DN215084_c0_g2	Picea sitchensis	PRQ35391.1putative P-loop containing nucleoside triphosphate hydrolase, leucine-rich repeat domain, L	F:GO:0016787; F:GO:0043531	F:hydrolase activity; F:ADP binding			1161.95	1.03651	1.53629e-12	1.25521e-10	52.345	47.119	69.606	39.172	36.364	39.738
TRINITY_DN212080_c1_g1							1003.21	1.07405	1.69628e-12	1.37923e-10	78.993	65.095	72.097	39.885	38.287	32.334
TRINITY_DN206455_c0_g1	Amborella trichopoda	XP_006848207.1protein DAMAGED DNA-BINDING 2	P:GO:0006281; P:GO:0009411; F:GO:0003684; C:GO:0005634; C:GO:0080008	P:DNA repair; P:response to UV; F:damaged DNA binding; C:nucleus; C:Cul4-RING E3 ubiquitin ligase complex			641.92	1.25924	2.26614e-12	1.81626e-10	37.844	14.667	45.264	17.191	19.887	16.103
TRINITY_DN209244_c1_g1	Picea sitchensis	ABK26674.1unknown					354.703	1.23482	7.04814e-12	5.20295e-10	37.022	28.673	53.867	22.442	20.913	20.761
TRINITY_DN212330_c0_g5	Cinnamomum micranthum f. kanehirae	RWR85514.1AP2/ERF and B3 domain-containing protein	P:GO:0006355; F:GO:0003677	P:regulation of transcription, DNA-templated; F:DNA binding			125.634	1.87752	8.26771e-12	6.02397e-10	12.124	5.668	14.331	3.136	3.373	4.538
TRINITY_DN206260_c0_g4	Pinus tabuliformis	AJA33585.1late embryogenesis abundant protein LEA8-2	P:GO:0009415	P:response to water			299.381	1.83259	1.21608e-11	8.63619e-10	290.838	134.77	209.44	69.793	74.321	59.958
TRINITY_DN211524_c0_g7	Amborella trichopoda	GAV84578.1DUF4149 domain-containing protein	C:GO:0016020	C:membrane			115.098	2.21665	1.32471e-11	9.2696e-10	8.467	5.86	12.482	2.028	2.489	2.093
TRINITY_DN214987_c3_g7	Picea sitchensis	ADM74399.1leucine rich repeat-like protein	F:GO:0043531	F:ADP binding			29.5908	8.76634	1.3273e-11	9.2696e-10	7.731	0	9.513	0	0	0
TRINITY_DN189141_c0_g1							32.4174	8.90544	1.61208e-11	1.10297e-09	12.199	0	6.706	0	0	0
TRINITY_DN211204_c0_g1	Pinus sylvestris	XP_010244253.1 probable isoaspartyl peptidase/L-asparaginase 2	P:GO:0016540; F:GO:0004067; F:GO:0008798; C:GO:0005737	P:protein autoprocessing; F:asparaginase activity; F:beta-aspartyl-peptidase activity; C:cytoplasm	EC:3.5.1.1; EC:3.4.19.5; EC:3.4.19	Asparaginase; Beta-aspartyl-peptidase; Acting on peptide bonds (peptidases)	1460.83	1.02761	1.74799e-11	1.19111e-09	64.544	43.575	57.919	28.001	28.214	36.666
TRINITY_DN211903_c0_g2	Beta vulgaris subsp. vulgaris	PRQ26177.1putative RNA-directed DNA polymerase	P:GO:0006278; P:GO:0090502; F:GO:0003676; F:GO:0003964; F:GO:0004523; F:GO:0016740; F:GO:0016779; C:GO:0016020; C:GO:0016021	P:RNA-dependent DNA biosynthetic process; P:RNA phosphodiester bond hydrolysis, endonucleolytic; F:nucleic acid binding; F:RNA-directed DNA polymerase activity; F:RNA-DNA hybrid ribonuclease activity; F:transferase activity; F:nucleotidyltransferase activity; C:membrane; C:integral component of membrane			38.3047	5.6485	1.82994e-11	1.24192e-09	6.025	0.085	3.094	0.153	0.094	0
TRINITY_DN210107_c3_g3	Marchantia polymorpha subsp. ruderalis	XP_024365161.1glycine-rich domain-containing protein 1-like isoform X2	C:GO:0005886	C:plasma membrane			82.0681	2.02313	1.96199e-11	1.31563e-09	6.398	4.547	7.692	1.688	1.923	1.467
TRINITY_DN207145_c2_g1							1999.87	1.09591	2.84727e-11	1.90169e-09	2240.65	2974.51	3861.01	1078.61	1401.77	1206.55
TRINITY_DN200908_c0_g2							47.2439	2.70557	3.00865e-11	1.99364e-09	18.255	7.825	13.689	2.467	2.76	2.496
TRINITY_DN214780_c1_g3							59.0115	3.0738	4.02403e-11	2.615e-09	17.754	9.191	21.985	3.728	1.757	1.793
TRINITY_DN211115_c1_g3	Larix gmelinii var. olgensis	AUF40283.1R2R3 MYB transcription factor	P:GO:0030154; F:GO:0000976; F:GO:0003677; C:GO:0005634	P:cell differentiation; F:transcription regulatory region sequence-specific DNA binding; F:DNA binding; C:nucleus			89.9336	2.22216	4.45389e-11	2.87216e-09	19.833	14.443	28.701	5.723	5.544	4.427
TRINITY_DN205047_c0_g1	Picea sitchensis	XP_024389907.1protein REVEILLE 8-like isoform X2	F:GO:0003677; C:GO:0005634	F:DNA binding; C:nucleus			296.453	1.05746	6.3867e-11	4.07176e-09	26.445	16.087	28.873	13.726	12.668	14.241
TRINITY_DN201125_c0_g2							63.478	2.47663	8.18913e-11	5.12384e-09	11.228	9.34	15.26	1.941	2.854	2.256
TRINITY_DN214621_c4_g3							36.3342	4.97984	9.88282e-11	6.07072e-09	7.923	0.171	3.104	0.121	0.236	0.18
TRINITY_DN213936_c1_g1	Musa acuminata subsp. malaccensis	XP_009414825.1PREDICTED: uncharacterized protein LOC103995837					278.932	1.01914	9.97095e-11	6.10259e-09	47.184	33.818	45.935	23.122	24.121	23.275
TRINITY_DN214251_c1_g4	Lupinus angustifolius	XP_019451151.1 poly [ADP-ribose] polymerase 3	P:GO:0006302; P:GO:0070212; F:GO:0003950; F:GO:1990404; C:GO:0005730	P:double-strand break repair; P:protein poly-ADP-ribosylation; F:NAD+ ADP-ribosyltransferase activity; F:protein ADP-ribosylase activity; C:nucleolus	EC:2.4.2.30	NAD(+) ADP-ribosyltransferase	31.654	4.94687	1.14037e-10	6.9291e-09	2.794	2.135	3.803	0	0.177	0.172
TRINITY_DN212826_c1_g1	Jatropha curcas	XP_012069008.1ABC transporter C family member 8	P:GO:0055085; F:GO:0005524; F:GO:0016887; F:GO:0042626; C:GO:0000325; C:GO:0005774; C:GO:0016021	P:transmembrane transport; F:ATP binding; F:ATPase activity; F:ATPase-coupled transmembrane transporter activity; C:plant-type vacuole; C:vacuolar membrane; C:integral component of membrane	EC:3.6.1.3; EC:3.6.1.15	Adenosinetriphosphatase; Nucleoside-triphosphate phosphatase	242.984	1.81644	1.86508e-10	1.0862e-08	34.922	24.808	22.321	9.538	8.905	6.374
TRINITY_DN207841_c0_g3	Phalaenopsis equestris	XP_020574182.1zinc finger CCCH domain-containing protein 17-like	P:GO:0000472; P:GO:0000480; F:GO:0034511; F:GO:0046872; C:GO:0005730; C:GO:0030686; C:GO:0032040	P:endonucleolytic cleavage to generate mature 5'-end of SSU-rRNA from (SSU-rRNA, 5.8S rRNA, LSU-rRNA); P:endonucleolytic cleavage in 5'-ETS of tricistronic rRNA transcript (SSU-rRNA, 5.8S rRNA, LSU-rRNA); F:U3 snoRNA binding; F:metal ion binding; C:nucleolus; C:90S preribosome; C:small-subunit processome			235.623	1.22262	2.80333e-10	1.59942e-08	30.027	10.461	24.687	11.27	11.359	12.345
TRINITY_DN215313_c6_g2	Picea sitchensis	AAX92685.1probable aquaporin	P:GO:0055085; F:GO:0015267; C:GO:0016021	P:transmembrane transport; F:channel activity; C:integral component of membrane			3732.31	1.33743	2.94649e-10	1.66418e-08	2877.55	1418.44	1899.94	867.78	802.483	788.913
TRINITY_DN209544_c1_g3	Picea sitchensis	XP_010921510.1 universal stress protein A-like protein					993.937	1.01159	4.91708e-10	2.71342e-08	239.057	133.969	220.189	122.045	116.571	106.525
TRINITY_DN214986_c7_g6	Picea sitchensis	ADE76855.1unknown	C:GO:0005776; C:GO:0061908	C:autophagosome; C:phagophore			289.566	1.21736	6.7698e-10	3.62874e-08	27.266	22.204	25.731	13.134	13.317	9.274
TRINITY_DN215607_c10_g1							55.702	3.04651	6.94203e-10	3.70925e-08	49.242	12.297	49.939	9.165	4.506	3.963
TRINITY_DN215361_c6_g2	Aquilegia coerulea	XP_020533354.1pentatricopeptide repeat-containing protein At4g16470 isoform X1	P:GO:0009157; P:GO:0046104; F:GO:0004797; F:GO:0005524; F:GO:0008270	P:deoxyribonucleoside monophosphate biosynthetic process; P:thymidine metabolic process; F:thymidine kinase activity; F:ATP binding; F:zinc ion binding			184.953	1.25626	7.50103e-10	3.97012e-08	24.173	17.187	25.693	10.13	11.371	10.303
TRINITY_DN211956_c0_g1							133.182	2.19255	7.86546e-10	4.1241e-08	26.637	9.682	42.208	7.455	11.087	7.721
TRINITY_DN209413_c2_g2	Picea sitchensis	AAY78890.1CC-NBS-LRR resistance-like protein	F:GO:0043531	F:ADP binding			31.1183	7.86721	1.03329e-09	5.28611e-08	7.933	0	11.697	0.077	0	0
TRINITY_DN208859_c0_g3	Jatropha curcas	XP_012082688.1BTB/POZ domain-containing protein At1g03010 isoform X1					140.772	1.76866	1.32658e-09	6.705e-08	7.283	4.153	9.599	2.138	2.878	3.2
TRINITY_DN214326_c1_g1							251.935	1.38273	1.52435e-09	7.63583e-08	73.672	43.436	57.909	28.483	30.88	34.856
TRINITY_DN185123_c0_g1							139.972	1.87094	1.63847e-09	8.11091e-08	27.34	14.069	39.258	8.826	7.219	10.792
TRINITY_DN213017_c0_g2							2626.47	1.45552	1.67957e-09	8.26574e-08	68.564	58.477	129.412	34.776	39.29	38.528
TRINITY_DN213836_c0_g3	Pinus taeda	AFG52735.1hypothetical protein 0_957_01, partial	F:GO:0004144	F:diacylglycerol O-acyltransferase activity			2792.69	1.20862	1.8906e-09	9.27717e-08	179.312	129.465	129.651	60.036	81.599	64.84
TRINITY_DN202447_c2_g4	Picea sitchensis	ADM73188.1MADS-domain transcription factor dal3 variant 2	P:GO:0045944; F:GO:0000977; F:GO:0003700; F:GO:0046983; C:GO:0005634	P:positive regulation of transcription by RNA polymerase II; F:RNA polymerase II regulatory region sequence-specific DNA binding; F:DNA-binding transcription factor activity; F:protein dimerization activity; C:nucleus			88.4755	3.71	1.93088e-09	9.44727e-08	45.553	13.226	41.528	2.796	5.756	0.961
TRINITY_DN211394_c0_g4	Picea sitchensis	ACN39761.1unknown					366.153	1.54809	2.05581e-09	1.00004e-07	52.495	36.882	33.27	11.238	15.121	11.35
TRINITY_DN182878_c0_g1							50.5698	5.05571	2.49011e-09	1.19673e-07	18.671	0	6.715	0	0.59	0.601
TRINITY_DN215130_c1_g6							109.577	4.2096	2.84502e-09	1.35267e-07	63.435	9.287	18.977	4.21	1.356	1.192
TRINITY_DN213268_c3_g1	Picea sitchensis	XP_008781243.1enoyl-CoA hydratase 2, peroxisomal	P:GO:0033542; F:GO:0080023; C:GO:0005777	P:fatty acid beta-oxidation, unsaturated, even number; F:3R-hydroxyacyl-CoA dehydratase activity; C:peroxisome			426.369	1.18173	2.92975e-09	1.38829e-07	43.09	22.695	49.968	22.64	22.918	19.183
TRINITY_DN130192_c0_g1	Nelumbo nucifera	RWR80447.1Vacuolar protein sorting-associated protein	C:GO:0016020; C:GO:0016021	C:membrane; C:integral component of membrane			128.159	1.4141	2.93643e-09	1.38829e-07	9.65	9.586	8.315	3.125	3.751	3.552
TRINITY_DN210908_c1_g1	Aquilegia coerulea	XP_027187198.1protein DMR6-LIKE OXYGENASE 1 isoform X2	F:GO:0051213	F:dioxygenase activity			41.3133	4.08742	3.10227e-09	1.45444e-07	4.532	2.306	8.344	0.406	0.637	0.232
TRINITY_DN201476_c0_g1							3020.72	1.20695	4.35645e-09	1.99248e-07	149.167	123.593	229.021	80.845	76.716	91.477
TRINITY_DN207356_c0_g6	Corchorus capsularis	OMO55398.1Phosphoglycerate mutase, 2,3-bisphosphoglycerate-independent	P:GO:0006007; P:GO:0044262; F:GO:0030145; F:GO:0046537; C:GO:0005737	P:glucose catabolic process; P:cellular carbohydrate metabolic process; F:manganese ion binding; F:2,3-bisphosphoglycerate-independent phosphoglycerate mutase activity; C:cytoplasm	EC:5.4.2.1	Intramolecular transferases	42.6029	2.59369	4.43813e-09	2.02434e-07	3.764	3.192	4.55	0.537	0.932	0.738
TRINITY_DN209654_c2_g2							85.6942	3.78044	4.91511e-09	2.20016e-07	32.427	2.316	41.308	8.453	2.029	1.664
TRINITY_DN203470_c0_g1	Picea sitchensis	ABK26341.1unknown	C:GO:0016020	C:membrane			17.3475	7.99722	5.016e-09	2.23937e-07	3.828	0	4.205	0	0	0
TRINITY_DN207820_c0_g3							34.1489	4.73622	5.0691e-09	2.25709e-07	8.946	3.608	11.524	0.121	0.118	0.927
TRINITY_DN208131_c1_g1	Vitis vinifera	XP_002278739.1 serine/threonine-protein kinase HT1	P:GO:0006468; F:GO:0004674; F:GO:0005524; C:GO:0005737; C:GO:0005886	P:protein phosphorylation; F:protein serine/threonine kinase activity; F:ATP binding; C:cytoplasm; C:plasma membrane	EC:2.7.11	Transferring phosphorus-containing groups	177.41	1.18897	6.75135e-09	2.95148e-07	13.606	11.561	15.538	6.699	6.605	6.391
TRINITY_DN214159_c3_g4	Picea sitchensis	ABK22230.1unknown					202.323	1.59183	6.91093e-09	3.01342e-07	122.36	61.37	87.597	32.112	37.332	26.715
TRINITY_DN213990_c0_g2							99.1154	1.74483	8.06475e-09	3.4984e-07	24.621	7.056	19.37	6.14	7.443	7.91
TRINITY_DN211530_c0_g2	Picea sitchensis	ABK26511.1unknown	P:GO:0010112	P:regulation of systemic acquired resistance			116.953	1.99287	1.05755e-08	4.49487e-07	42.343	13.674	32.121	13.869	7.03	8.013
TRINITY_DN214663_c0_g7	Acinetobacter baumannii	OIC65326.1thiazole biosynthesis enzyme	P:GO:0009228; P:GO:0052837; F:GO:0005506; F:GO:0016763; C:GO:0005829; C:GO:0009570	P:thiamine biosynthetic process; P:thiazole biosynthetic process; F:iron ion binding; F:transferase activity, transferring pentosyl groups; C:cytosol; C:chloroplast stroma			613.812	1.80886	1.12941e-08	4.77615e-07	992.996	297.124	598.691	225.343	192.603	227.231
TRINITY_DN199194_c0_g2							145.715	1.74247	1.63373e-08	6.73956e-07	38.099	22.321	37.754	10.996	8.74	16.257
TRINITY_DN208479_c0_g1	Pinus tabuliformis	XP_024360463.1auxin transporter-like protein 3	C:GO:0016021	C:integral component of membrane			573.2	1.23246	1.6469e-08	6.77724e-07	56.046	52.499	63.513	29.294	26.586	21.156
TRINITY_DN206430_c0_g3	Picea sitchensis	ADM75176.1F-box-like protein					408.023	1.12572	1.68872e-08	6.93239e-07	35.999	33.391	40.254	17.706	22.658	17.887
TRINITY_DN211806_c2_g2							197.352	1.1649	1.80362e-08	7.36815e-07	45.489	38.184	39.478	20.951	18.436	18.299
TRINITY_DN214197_c0_g6	Picea sitchensis	EOY10934.1Phosphoenolpyruvate carboxylase kinase 1	P:GO:0018105; P:GO:0035556; P:GO:0046777; F:GO:0005516; F:GO:0005524; F:GO:0009931; C:GO:0005634; C:GO:0005737	P:peptidyl-serine phosphorylation; P:intracellular signal transduction; P:protein autophosphorylation; F:calmodulin binding; F:ATP binding; F:calcium-dependent protein serine/threonine kinase activity; C:nucleus; C:cytoplasm	EC:2.7.11	Transferring phosphorus-containing groups	82.3298	2.46953	1.95716e-08	7.84309e-07	25.656	10.483	13.919	3.179	2.843	4.941
TRINITY_DN208083_c0_g3	Arachis hypogaea/Arachis ipaensis	XP_016183966.1AMP deaminase isoform X1	P:GO:0009737; P:GO:0009793; P:GO:0032264; P:GO:0046033; F:GO:0003876; F:GO:0043424; C:GO:0005634; C:GO:0005829; C:GO:0031307	P:response to abscisic acid; P:embryo development ending in seed dormancy; P:IMP salvage; P:AMP metabolic process; F:AMP deaminase activity; F:protein histidine kinase binding; C:nucleus; C:cytosol; C:integral component of mitochondrial outer membrane	EC:3.5.4.17; EC:3.5.4.6	Adenosine-phosphate deaminase; AMP deaminase	701.709	1.07963	2.04533e-08	8.13827e-07	28.641	23.527	39.928	16.993	16.289	17.69
TRINITY_DN187823_c0_g1	Pinus banksiana	AAC49545.1alcohol dehydrogenase	P:GO:0046294; P:GO:0055114; F:GO:0004024; F:GO:0008270; F:GO:0051903; C:GO:0005829	P:formaldehyde catabolic process; P:oxidation-reduction process; F:alcohol dehydrogenase activity, zinc-dependent; F:zinc ion binding; F:S-(hydroxymethyl)glutathione dehydrogenase activity; C:cytosol	EC:1.1.1.284; EC:1.1.1.1; EC:1.1.1.71	S-(hydroxymethyl)glutathione dehydrogenase; Alcohol dehydrogenase; Alcohol dehydrogenase (NAD(P)(+))	419.062	1.34484	2.27094e-08	8.97236e-07	102.985	95.54	132.142	49.116	53.633	36.263
TRINITY_DN204089_c5_g3							17.8575	8.03356	2.33478e-08	9.20299e-07	1.525	0	3.286	0	0	0
TRINITY_DN196182_c0_g1	Picea sitchensis	XP_006841460.1probable enoyl-CoA hydratase 1, peroxisomal	F:GO:0003824; C:GO:0005777	F:catalytic activity; C:peroxisome			668.753	1.20573	2.34902e-08	9.23748e-07	78.086	58.028	90.413	38.284	43.972	29.941
TRINITY_DN130669_c0_g3	Selaginella moellendorffii	XP_002980367.1uncharacterized protein LOC9647480	P:GO:0006355; F:GO:0003700	P:regulation of transcription, DNA-templated; F:DNA-binding transcription factor activity			82.2523	2.13017	2.37345e-08	9.31178e-07	8.083	4.313	9.129	2.467	2.265	1.304
TRINITY_DN214981_c1_g2	Picea sitchensis	XP_010257021.1 laccase-12-like	P:GO:0046274; P:GO:0055114; F:GO:0005507; F:GO:0052716; C:GO:0016020; C:GO:0048046	P:lignin catabolic process; P:oxidation-reduction process; F:copper ion binding; F:hydroquinone:oxygen oxidoreductase activity; C:membrane; C:apoplast	EC:1.10.3; EC:1.10.3.2	Acting on diphenols and related substances as donors; Laccase	220.231	1.38807	2.74179e-08	1.0633e-06	25.314	32.462	25.127	9.736	11.948	7.893
TRINITY_DN211623_c0_g1							216.912	1.1273	3.17596e-08	1.22057e-06	15.504	14.198	12.98	7.499	5.839	6.554
TRINITY_DN214623_c1_g4	Acinetobacter baumannii	WP_071414355.1hypothetical protein					3714.04	1.22264	3.90125e-08	1.47224e-06	1828.29	1647.78	2389.12	923.671	1051.3	985.482
TRINITY_DN202014_c1_g1	Populus trichocarpa	XP_006386257.1protein TIFY 4B isoform X2	P:GO:0009611; P:GO:0031347; P:GO:2000022; C:GO:0005634	P:response to wounding; P:regulation of defense response; P:regulation of jasmonic acid mediated signaling pathway; C:nucleus			117.107	2.02645	5.46613e-08	2.00437e-06	11.815	10.824	21.018	4.024	4.73	3.354
TRINITY_DN215326_c1_g2	Picea sitchensis	ABR16319.1unknown	P:GO:0000105; F:GO:0000287; F:GO:0003879; C:GO:0005737	P:histidine biosynthetic process; F:magnesium ion binding; F:ATP phosphoribosyltransferase activity; C:cytoplasm			189.088	1.24688	5.5275e-08	2.02246e-06	12.156	6.843	9.656	4.506	4.352	3.895
TRINITY_DN204272_c0_g4	Picea sitchensis	XP_006853268.1EPIDERMAL PATTERNING FACTOR-like protein 1	P:GO:0010052	P:guard cell differentiation			120.063	2.11188	6.60234e-08	2.35932e-06	5.769	4.195	10.653	2.445	2.182	2.162
TRINITY_DN211599_c0_g3	Corchorus olitorius	XP_022726935.1probable leucine-rich repeat receptor-like protein kinase At1g35710	P:GO:0016310; F:GO:0016301; C:GO:0005886	P:phosphorylation; F:kinase activity; C:plasma membrane			332.864	1.09164	8.33411e-08	2.86853e-06	24.44	18.51	19.293	12.224	9.601	10.26
TRINITY_DN199743_c0_g3	Marchantia polymorpha subsp. ruderalis	ADB22517.1protein phosphtase 2C	P:GO:0006470; F:GO:0003824; F:GO:0004721; F:GO:0004722; F:GO:0016787; F:GO:0043169; F:GO:0046872; C:GO:0005634; C:GO:0005829	P:protein dephosphorylation; F:catalytic activity; F:phosphoprotein phosphatase activity; F:protein serine/threonine phosphatase activity; F:hydrolase activity; F:cation binding; F:metal ion binding; C:nucleus; C:cytosol			896.509	1.12998	8.43074e-08	2.88998e-06	57.101	47.215	84.11	35.357	30.42	33.998
TRINITY_DN203536_c0_g1	Picea sitchensis	XP_024388632.1two-component response regulator ORR21-like isoform X1	P:GO:0000160; P:GO:0006355; F:GO:0003677; F:GO:0003700; C:GO:0005634	P:phosphorelay signal transduction system; P:regulation of transcription, DNA-templated; F:DNA binding; F:DNA-binding transcription factor activity; C:nucleus			28.7139	4.79558	8.79031e-08	3.00101e-06	4.319	4.622	2.165	0.055	0.224	0.051
TRINITY_DN213897_c0_g1							86.3853	2.30757	9.74928e-08	3.30161e-06	6.835	2.327	9.819	2.533	2.394	1.029
TRINITY_DN211018_c1_g3	Nelumbo nucifera	XP_010257260.1 serine/threonine-protein kinase UCNL-like	P:GO:0016310; F:GO:0004672; C:GO:0005622; C:GO:0110165	P:phosphorylation; F:protein kinase activity; C:intracellular; C:cellular anatomical entity			190.215	1.85831	9.81135e-08	3.31596e-06	14.406	11.091	28.279	5.92	6.487	5.654
TRINITY_DN206494_c0_g1	Picea sitchensis	PSR86922.1N utilization substance protein like	P:GO:0006353; P:GO:0006355; F:GO:0003723; C:GO:0009507	P:DNA-templated transcription, termination; P:regulation of transcription, DNA-templated; F:RNA binding; C:chloroplast			183.112	1.00814	1.20512e-07	4.04052e-06	18.703	10.451	17.263	8.672	9.389	9.488
TRINITY_DN201928_c0_g2							13.404	7.62186	1.26679e-07	4.23042e-06	4.276	0.128	6.342	0	0	0
TRINITY_DN213462_c0_g2	Selaginella moellendorffii	XP_024519554.1band 3 anion transport protein-like					102.078	1.68688	1.50507e-07	4.99816e-06	10.855	4.654	6.37	2.368	2.854	3.243
TRINITY_DN213452_c0_g1	Taxus wallichiana var. chinensis	XP_016665673.1 allene oxide synthase-like isoform X1	P:GO:0009695; P:GO:0016125; P:GO:0055114; F:GO:0016491; F:GO:0046872; C:GO:0009535; C:GO:0009941	P:jasmonic acid biosynthetic process; P:sterol metabolic process; P:oxidation-reduction process; F:oxidoreductase activity; F:metal ion binding; C:chloroplast thylakoid membrane; C:chloroplast envelope			423.317	2.38887	1.60084e-07	5.2831e-06	73.043	8.06	39.085	8.628	18.919	6.46
TRINITY_DN205489_c0_g1	Cinnamomum micranthum f. kanehirae	RWR96455.1O-acyltransferase WSD1-like protein isoform X1	F:GO:0004144; C:GO:0016020	F:diacylglycerol O-acyltransferase activity; C:membrane	EC:2.3.1.20	Diacylglycerol O-acyltransferase	504.796	1.62004	1.85294e-07	6.00902e-06	61.398	19.62	33.404	19.087	16.737	12.783
TRINITY_DN196481_c0_g2	Elaeis guineensis	XP_010940086.1 transcription factor bHLH63-like isoform X1	P:GO:0006355; P:GO:0009299; P:GO:0009725; P:GO:0009735; P:GO:0009826; F:GO:0000976; F:GO:0003700; F:GO:0043425; F:GO:0046983; C:GO:0005634	P:regulation of transcription, DNA-templated; P:mRNA transcription; P:response to hormone; P:response to cytokinin; P:unidimensional cell growth; F:transcription regulatory region sequence-specific DNA binding; F:DNA-binding transcription factor activity; F:bHLH transcription factor binding; F:protein dimerization activity; C:nucleus			33.7133	3.6872	1.89187e-07	6.08835e-06	8.285	9.34	5.029	0.636	0.849	0.189
TRINITY_DN213648_c1_g5	Vitis vinifera	XP_002270737.1 protein NUCLEAR FUSION DEFECTIVE 4	C:GO:0016020	C:membrane			209.729	1.06464	1.92676e-07	6.17701e-06	11.772	7.44	11.103	5.701	4.718	6.546
TRINITY_DN215038_c2_g4	Vitis vinifera	RVX02877.1Transposon TX1 uncharacterized 149 kDa protein	P:GO:0006278; P:GO:0090502; F:GO:0003676; F:GO:0003964; F:GO:0004523; F:GO:0008270	P:RNA-dependent DNA biosynthetic process; P:RNA phosphodiester bond hydrolysis, endonucleolytic; F:nucleic acid binding; F:RNA-directed DNA polymerase activity; F:RNA-DNA hybrid ribonuclease activity; F:zinc ion binding			290.918	2.32796	1.99056e-07	6.36941e-06	21.518	2.861	20.596	6.918	2.088	3.963
TRINITY_DN208025_c1_g4	Picea sitchensis	XP_004513723.1agamous-like MADS-box protein AGL1 isoform X3	P:GO:0006355; F:GO:0003700; C:GO:0005634	P:regulation of transcription, DNA-templated; F:DNA-binding transcription factor activity; C:nucleus			1637.57	1.02928	2.27686e-07	7.23052e-06	196.671	151.017	171.083	80.702	113.764	82.401
TRINITY_DN179751_c0_g1	Picea sitchensis	PIN25326.1Arylacetamide deacetylase	F:GO:0016787	F:hydrolase activity			90.9434	2.39812	2.33344e-07	7.35472e-06	12.177	8.305	16.717	4.363	2.217	1.819
TRINITY_DN208601_c0_g4							102.451	1.99033	2.35028e-07	7.39394e-06	22.521	8.433	18.441	5.372	3.079	7.121
TRINITY_DN212288_c0_g3	Picea sitchensis	XP_010273364.1 probable inactive purple acid phosphatase 27	P:GO:0016311; F:GO:0003993; F:GO:0046872	P:dephosphorylation; F:acid phosphatase activity; F:metal ion binding	EC:3.1.3.2	Acid phosphatase	335.353	1.23281	2.57647e-07	8.00083e-06	17.893	17.688	25.798	9.429	10.498	8.991
TRINITY_DN213252_c0_g1	Pinus taeda	AAC49540.1alcohol dehydrogenase	P:GO:0009409; P:GO:0009413; P:GO:0009414; P:GO:0009651; P:GO:0009737; P:GO:0009744; P:GO:0031000; P:GO:0032355; P:GO:0042542; P:GO:0046294; P:GO:0046686; P:GO:0055114; P:GO:1900039; F:GO:0004024; F:GO:0008270; F:GO:0042803; F:GO:0051903; C:GO:0005829; C:GO:0005886	P:response to cold; P:response to flooding; P:response to water deprivation; P:response to salt stress; P:response to abscisic acid; P:response to sucrose; P:response to caffeine; P:response to estradiol; P:response to hydrogen peroxide; P:formaldehyde catabolic process; P:response to cadmium ion; P:oxidation-reduction process; P:positive regulation of cellular response to hypoxia; F:alcohol dehy…	EC:1.1.1.284; EC:1.1.1.1; EC:1.1.1.71	S-(hydroxymethyl)glutathione dehydrogenase; Alcohol dehydrogenase; Alcohol dehydrogenase (NAD(P)(+))	46.83	2.2559	2.58477e-07	8.01185e-06	3.423	1.26	4.004	1.842	0.72	2.119
TRINITY_DN199256_c0_g1							59.0994	4.1487	2.7365e-07	8.43555e-06	17.68	6.373	2.692	0.548	0.519	0.395
TRINITY_DN215042_c1_g2	Picea sitchensis	XP_019053256.1 F-box/LRR-repeat protein 3-like isoform X2	P:GO:0044267	P:cellular protein metabolic process			633.451	1.00012	3.16293e-07	9.64407e-06	58.477	46.03	74.032	33.57	34.631	39.446
TRINITY_DN204423_c0_g3	Arabidopsis thaliana	NP_001329400.1PQ-loop repeat family protein / transmembrane family protein	C:GO:0016021	C:integral component of membrane			29.7103	6.88526	3.8604e-07	1.15408e-05	2.538	4.035	14.37	0.132	0.142	0
TRINITY_DN184880_c0_g1	Ginkgo biloba	AFQ37424.1myb domain protein 33	F:GO:0003677; C:GO:0005634	F:DNA binding; C:nucleus			12.151	7.47962	3.98576e-07	1.18314e-05	1.002	0	1.552	0	0	0
TRINITY_DN186017_c1_g1	Manihot esculenta	ABM55240.1retrotransposon protein	P:GO:0006508; P:GO:0015074; F:GO:0003676; F:GO:0004190; F:GO:0008270	P:proteolysis; P:DNA integration; F:nucleic acid binding; F:aspartic-type endopeptidase activity; F:zinc ion binding			20.7291	3.29398	4.11315e-07	1.21881e-05	7.315	2.434	6.351	0.439	0.849	0.832
TRINITY_DN204821_c0_g2	Picea sitchensis	RWR75190.1Damaged dna-binding 2, putative isoform 1	F:GO:0003677	F:DNA binding			269.508	1.15234	4.23587e-07	1.25077e-05	25.901	25.374	36.499	12.871	14.355	13.735
TRINITY_DN202658_c0_g2	Picea sitchensis	ABR18454.1unknown					43.8955	2.28018	4.6961e-07	1.38182e-05	4.041	5.348	6.236	0.943	1.132	1.124
TRINITY_DN213574_c0_g6	Pinus taeda	AFG52465.1hypothetical protein 0_4707_01, partial	P:GO:0090502; F:GO:0003723; F:GO:0033897	P:RNA phosphodiester bond hydrolysis, endonucleolytic; F:RNA binding; F:ribonuclease T2 activity	EC:3.1.31; EC:3.1.27; EC:4.6.1.19	Acting on ester bonds; Acting on ester bonds; Ribonuclease T(2)	71.7632	1.69311	4.77986e-07	1.40156e-05	35.615	20.741	27.34	8.398	10.38	10.398
TRINITY_DN191652_c0_g1	Macleaya cordata	OVA00904.1Glycoside hydrolase	P:GO:0005975; P:GO:0071554; F:GO:0016787; C:GO:0110165	P:carbohydrate metabolic process; P:cell wall organization or biogenesis; F:hydrolase activity; C:cellular anatomical entity			364.514	1.77783	4.82891e-07	1.41349e-05	69.438	33.135	31.824	17.015	12.09	15.948
TRINITY_DN209012_c5_g3							22.8898	3.79981	5.13026e-07	1.4939e-05	7.976	5.743	9.158	1.107	0.153	0.609
TRINITY_DN207340_c0_g3							15.1669	7.79699	5.30752e-07	1.54285e-05	0.714	1.377	2.385	0	0	0
TRINITY_DN203773_c0_g1	Aureobasidium pullulans/Aureobasidium pullulans EXF-150	KEQ84890.12-epi-5-epi-valiolone synthase-like protein					18.7622	3.79496	5.46363e-07	1.58276e-05	3.935	0.331	2.213	0.208	0.201	0.266
TRINITY_DN212944_c0_g1	Aureobasidium pullulans EXF-150	KEQ89156.1hypothetical protein M438DRAFT_340974					29.003	3.04451	5.59113e-07	1.61414e-05	3.647	0.854	6.38	0.735	0.531	0.455
TRINITY_DN204562_c0_g1	Coffea arabica	XP_027102495.1uncharacterized protein LOC113723714					53.1897	2.20263	5.74396e-07	1.65259e-05	18.223	26.484	22.579	2.807	5.968	4.307
TRINITY_DN213682_c1_g8							40.0527	2.29002	6.02817e-07	1.72258e-05	5.364	3.405	5.987	0.866	1.592	1.098
TRINITY_DN214808_c0_g1	Picea sitchensis	BAJ85801.1predicted protein					22.2124	3.0927	6.43852e-07	1.83052e-05	2.623	0.406	1.878	0.417	0.212	0.395
TRINITY_DN182878_c0_g3							22.7692	5.48765	7.66475e-07	2.14295e-05	8.083	0.416	4.608	0	0.448	0
TRINITY_DN203250_c0_g7							258.502	1.18266	9.25649e-07	2.55403e-05	168.563	61.754	140.927	77.029	60.993	61.031
TRINITY_DN206076_c1_g1	Picea sitchensis	ABK24013.1unknown	P:GO:0030001; F:GO:0046872	P:metal ion transport; F:metal ion binding			11.646	7.43035	1.1611e-06	3.12678e-05	5.129	0	2.462	0	0	0
TRINITY_DN208553_c1_g2	Picea sitchensis	XP_001703566.1predicted protein	P:GO:0006508; P:GO:0019748; F:GO:0004185; F:GO:0016747; C:GO:0016020	P:proteolysis; P:secondary metabolic process; F:serine-type carboxypeptidase activity; F:transferase activity, transferring acyl groups other than amino-acyl groups; C:membrane	EC:3.4.21; EC:3.4.16	Acting on peptide bonds (peptidases); Acting on peptide bonds (peptidases)	32.35	2.16495	1.20306e-06	3.23461e-05	4.926	2.946	5.02	0.932	1.168	1.364
TRINITY_DN215130_c1_g9							24.3546	4.05549	1.25017e-06	3.33995e-05	25.613	6.149	8.143	1.283	0.837	1.09
TRINITY_DN208815_c0_g1	Dendrobium catenatum	XP_020686672.1uncharacterized protein LOC110102608					220.612	1.21784	1.25306e-06	3.34235e-05	19.354	12.927	28.432	9.911	10.462	10.681
TRINITY_DN208322_c0_g1	Gossypium hirsutum	XP_016736787.1 transcription factor MYC2-like	F:GO:0003677; F:GO:0046983	F:DNA binding; F:protein dimerization activity			652.779	1.55214	1.35458e-06	3.59373e-05	100.692	63.056	47.458	28.911	23.531	30.121
TRINITY_DN215234_c1_g1	Nelumbo nucifera	XP_010245311.1 protein STABILIZED1	P:GO:0000244; P:GO:0080188; P:GO:2000630; P:GO:2000636; C:GO:0046540; C:GO:0071013	P:spliceosomal tri-snRNP complex assembly; P:RNA-directed DNA methylation; P:positive regulation of miRNA metabolic process; P:positive regulation of primary miRNA processing; C:U4/U6 x U5 tri-snRNP complex; C:catalytic step 2 spliceosome			19.66	4.93854	1.43756e-06	3.79835e-05	2.09	0.192	1.504	0.022	0.059	0.051
TRINITY_DN210865_c0_g1	Chenopodium quinoa	XP_021761550.1uncharacterized protein LOC110726353	F:GO:0003676; F:GO:0008270	F:nucleic acid binding; F:zinc ion binding			113.761	1.15312	1.69328e-06	4.40488e-05	7.688	4.857	8.057	3.782	3.692	3.406
TRINITY_DN205204_c0_g1	Pinus contorta	AFU73872.1putative monofunctional diterpene synthase	P:GO:0006952; P:GO:0008152; F:GO:0000287; F:GO:0010333; F:GO:0050554; F:GO:0050559; F:GO:0052678; C:GO:0009507	P:defense response; P:metabolic process; F:magnesium ion binding; F:terpene synthase activity; F:abietadiene synthase activity; F:copalyl diphosphate synthase activity; F:levopimaradiene synthase activity; C:chloroplast	EC:4.2.3.32; EC:5.5.1.12; EC:4.2.3.18	Levopimaradiene synthase; Copalyl diphosphate synthase; Abieta-7,13-diene synthase	43.2886	3.13798	1.82171e-06	4.7171e-05	34.165	3.512	29.228	2.774	6.074	1.381
TRINITY_DN212935_c0_g5	Picea sitchensis	PWA68280.1thioredoxin-like fold protein	P:GO:0019432; F:GO:0004144; C:GO:0005829	P:triglyceride biosynthetic process; F:diacylglycerol O-acyltransferase activity; C:cytosol	EC:2.3.1.20	Diacylglycerol O-acyltransferase	731.968	1.11638	2.40719e-06	6.10172e-05	86.286	61.562	108.499	43.021	34.831	57.17
TRINITY_DN210622_c0_g2	Picea sitchensis	ADW94528.1putative truncated TIR-NBS-LRR protein	P:GO:0007165; F:GO:0043531	P:signal transduction; F:ADP binding			201.257	1.89408	2.5067e-06	6.30648e-05	7.677	7.91	15.854	3.552	2.288	4.006
TRINITY_DN205809_c0_g1							22.5685	3.1103	2.51776e-06	6.32484e-05	2.367	1.249	2.74	0.307	0.448	0.146
TRINITY_DN209538_c2_g1	Picea sitchensis	XP_024357088.1malate synthase, glyoxysomal-like	P:GO:0006097; P:GO:0006099; F:GO:0004474; C:GO:0009514	P:glyoxylate cycle; P:tricarboxylic acid cycle; F:malate synthase activity; C:glyoxysome	EC:2.3.3.9	Malate synthase	56.2681	3.72221	2.5979e-06	6.51643e-05	4.18	2.626	10.317	0.274	1.262	0.197
TRINITY_DN167686_c0_g1	Pinus massoniana	AIZ74344.1polymerase subunit	P:GO:0006351; F:GO:0003899; C:GO:0005665; C:GO:0005666; C:GO:0005736	P:transcription, DNA-templated; F:DNA-directed 5'-3' RNA polymerase activity; C:RNA polymerase II, core complex; C:RNA polymerase III complex; C:RNA polymerase I complex	EC:2.7.7.6	DNA-directed RNA polymerase	91.6575	1.5773	2.62762e-06	6.58116e-05	19.801	16.706	20.06	6.304	9.094	5.714
TRINITY_DN208919_c1_g1							136.715	1.43028	2.66065e-06	6.64412e-05	29.377	18.435	41.221	13.759	6.936	16.369
TRINITY_DN213904_c9_g3	Punica granatum	PKI59741.1hypothetical protein CRG98_019844	F:GO:0003676; F:GO:0008270	F:nucleic acid binding; F:zinc ion binding			56.4828	1.72613	2.71694e-06	6.76463e-05	2.794	1.42	2.883	0.976	1.132	1.115
TRINITY_DN213130_c0_g1	Pinus tabuliformis	XP_012460179.1 O-acyltransferase WSD1-like	F:GO:0016740	F:transferase activity			1659.73	1.07296	2.77409e-06	6.89671e-05	349.197	257.52	227.968	117.232	160.414	141.716
TRINITY_DN205507_c3_g2							390.422	1.03855	2.85216e-06	7.04944e-05	53.796	49.04	78.065	33.822	35.397	33.793
TRINITY_DN194638_c0_g1							25.5701	2.61994	2.95921e-06	7.2923e-05	4.297	2.274	5.872	1.042	0.826	0.626
TRINITY_DN210802_c0_g3	Picea sitchensis	XP_015894870.1linamarin synthase 1	F:GO:0008194	F:UDP-glycosyltransferase activity			121.042	1.46813	2.98461e-06	7.33344e-05	19.087	5.636	14.427	6.699	5.957	8.836
TRINITY_DN180657_c0_g2	Pinus taeda/Pinus radiata	PSS15434.1Auxin-responsive protein	P:GO:0009733	P:response to auxin			341.496	1.16505	3.07661e-06	7.54847e-05	60.599	32.58	38.75	23.769	19.851	22.434
TRINITY_DN215130_c1_g13							18.6723	3.96072	3.2819e-06	8.04043e-05	29.228	6.202	13.268	0.965	1.321	1.699
TRINITY_DN206413_c1_g1	Pinus banksiana	Q50EK5.1RecName: Full=Cytochrome P450 720B2; AltName: Full=Cytochrome P450 CYPB	P:GO:0055114; F:GO:0004497; F:GO:0005506; F:GO:0016705; F:GO:0020037; C:GO:0016021	P:oxidation-reduction process; F:monooxygenase activity; F:iron ion binding; F:oxidoreductase activity, acting on paired donors, with incorporation or reduction of molecular oxygen; F:heme binding; C:integral component of membrane			39.671	2.21853	3.4518e-06	8.37137e-05	30.55	6.287	47.965	10.514	7.466	6.434
TRINITY_DN207427_c0_g1							43.9003	2.7842	3.77252e-06	9.07076e-05	26.551	1.772	10.825	1.71	3.279	2.943
TRINITY_DN202654_c1_g3	Gladiolus hybrid cultivar	AKO62912.1protein phosphatase 2C	F:GO:0016787; C:GO:0005622; C:GO:0110165	F:hydrolase activity; C:intracellular; C:cellular anatomical entity			792.508	1.06058	3.79641e-06	9.11517e-05	47.057	44.546	79.09	31.443	28.922	34.273
TRINITY_DN212772_c6_g4	Malus domestica	GAV66430.1Chromo domain-containing protein	P:GO:0006278; P:GO:0015074; F:GO:0003676; F:GO:0003964; F:GO:0008270	P:RNA-dependent DNA biosynthetic process; P:DNA integration; F:nucleic acid binding; F:RNA-directed DNA polymerase activity; F:zinc ion binding			15.5603	4.57673	3.90644e-06	9.32614e-05	1.642	1.1	2.615	0	0.165	0.12
TRINITY_DN190154_c0_g1	Picea sitchensis	ADE77142.1unknown					19.8949	7.2129	3.96367e-06	9.44936e-05	1.429	3.128	9.101	0.099	0	0
TRINITY_DN212004_c0_g4							162.568	2.22524	4.18799e-06	9.88612e-05	182.809	42.411	67.652	27.244	30.396	22.28
TRINITY_DN210864_c3_g11							13.4575	7.63976	4.89874e-06	0.00011404	3.839	0	0.718	0	0	0
TRINITY_DN190710_c0_g3	Picea sitchensis	PSR95600.1Valine--tRNA ligase	F:GO:0016874	F:ligase activity			101.409	1.51558	4.94624e-06	0.000114986	12.103	19.716	12.98	3.837	5.945	3.689
TRINITY_DN107090_c0_g3	Nelumbo nucifera	XP_006828190.1wound-induced protein 1					10.6212	7.28263	5.11805e-06	0.000118653	1.749	0.651	4.723	0	0	0
TRINITY_DN169129_c0_g1							377.053	1.03852	6.31012e-06	0.000143521	65.781	43.628	50.552	28.395	33.38	24.098
TRINITY_DN198200_c0_g1	Prunus yedoensis var. nudiflora	PQQ05293.1putative inactive cadmium/zinc-transporting ATPase HMA3	P:GO:0000041; P:GO:0070838; P:GO:0098662; F:GO:0000166; F:GO:0005385; F:GO:0015086; F:GO:0043167; C:GO:0016020	P:transition metal ion transport; P:divalent metal ion transport; P:inorganic cation transmembrane transport; F:nucleotide binding; F:zinc ion transmembrane transporter activity; F:cadmium ion transmembrane transporter activity; F:ion binding; C:membrane			40.0776	1.95084	6.41475e-06	0.000145508	9.394	4.238	6.466	2.226	1.946	2.128
TRINITY_DN209500_c3_g3	Pinus taeda	AFG58654.1hypothetical protein 2_3883_01, partial					112.558	1.40143	6.5739e-06	0.000148917	15.526	7.91	10.518	10.371	7.702	8.776
TRINITY_DN213310_c0_g5							211.219	1.89457	6.83295e-06	0.000153545	16.091	7.579	31.67	16.489	4.565	12.765
TRINITY_DN210180_c0_g1	Picea sitchensis	XP_024375832.1WASH complex subunit 1-like	F:GO:0003677	F:DNA binding			235.245	2.50753	6.95191e-06	0.000155917	8.637	6.202	38.874	4.528	3.857	4.452
TRINITY_DN181558_c0_g1							11.6848	7.41999	6.95701e-06	0.000155917	1.088	0	4.292	0	0	0
TRINITY_DN215393_c6_g1	Morus notabilis	XP_024019153.1probable LRR receptor-like serine/threonine-protein kinase At1g56140	P:GO:0009734; P:GO:0046777; F:GO:0004674; F:GO:0005524; C:GO:0005634; C:GO:0005886; C:GO:0016021	P:auxin-activated signaling pathway; P:protein autophosphorylation; F:protein serine/threonine kinase activity; F:ATP binding; C:nucleus; C:plasma membrane; C:integral component of membrane	EC:2.7.11	Transferring phosphorus-containing groups	117.565	1.14096	6.96842e-06	0.000155965	40.787	23.944	39.478	17.629	18.223	21.121
TRINITY_DN213792_c0_g2	Picea sitchensis	AAM28917.1putative TIR/NBS/LRR disease resistance protein	P:GO:0007165; F:GO:0043531	P:signal transduction; F:ADP binding			188.069	1.11737	7.00502e-06	0.000156161	37.481	22.108	31.996	12.871	24.664	19.14
TRINITY_DN199201_c0_g2	Cinnamomum micranthum f. kanehirae	RWR77369.1RNA polymerase II transcription mediator	C:GO:0005634	C:nucleus			45.2695	1.78253	7.20563e-06	0.000159997	6.803	5.028	5.039	2.533	1.722	2.136
TRINITY_DN213086_c3_g3	Picea sitchensis	ABK23937.1unknown	P:GO:0010112	P:regulation of systemic acquired resistance			34.0769	2.40304	7.29116e-06	0.000161683	32.416	6.234	20.683	5.844	3.633	5.328
TRINITY_DN128857_c0_g2	Manihot esculenta	EEF50354.1 oxidoreductase, putative	P:GO:0055114; F:GO:0016491	P:oxidation-reduction process; F:oxidoreductase activity			134.934	10.958	8.22391e-06	0.00018023	24.088	0	4.397	0	0	0
TRINITY_DN210257_c0_g1							244.462	1.14487	8.28653e-06	0.000181366	146.352	90.683	98.671	56.089	45.093	55.249
TRINITY_DN205003_c2_g1	Nelumbo nucifera	XP_010256837.1 L-type lectin-domain containing receptor kinase S.4-like	P:GO:0002229; P:GO:0006468; P:GO:0007178; P:GO:0042742; F:GO:0004675; F:GO:0005524; F:GO:0030246; C:GO:0005886; C:GO:0016021	P:defense response to oomycetes; P:protein phosphorylation; P:transmembrane receptor protein serine/threonine kinase signaling pathway; P:defense response to bacterium; F:transmembrane receptor protein serine/threonine kinase activity; F:ATP binding; F:carbohydrate binding; C:plasma membrane; C:integral component of membrane	EC:2.7.11	Transferring phosphorus-containing groups	200.838	1.02322	8.68806e-06	0.000188682	38.537	33.85	33.165	22.672	17.587	17.535
TRINITY_DN203489_c0_g4	Picea sitchensis	XP_002979047.1cationic peroxidase 1	P:GO:0006979; P:GO:0042744; P:GO:0055114; P:GO:0098869; F:GO:0004601; F:GO:0020037; F:GO:0046872; C:GO:0005576	P:response to oxidative stress; P:hydrogen peroxide catabolic process; P:oxidation-reduction process; P:cellular oxidant detoxification; F:peroxidase activity; F:heme binding; F:metal ion binding; C:extracellular region	EC:1.11.1.7	Peroxidase	41.2689	1.74452	9.26976e-06	0.000199427	5.321	7.942	6.016	1.853	1.71	1.621
TRINITY_DN205215_c0_g1							13.6188	4.69351	9.53237e-06	0.000204121	4.98	0	8.545	0.395	0.389	0
TRINITY_DN213310_c0_g2							89.1311	2.19597	1.00185e-05	0.000212102	13.201	16.856	35.751	4.418	6.546	5.087
TRINITY_DN197313_c1_g2	Picea sitchensis	AEJ87846.1stearoyl-ACP desaturase	P:GO:0006631; P:GO:0006633; P:GO:0055114; F:GO:0016491; F:GO:0045300; F:GO:0046872; C:GO:0009507	P:fatty acid metabolic process; P:fatty acid biosynthetic process; P:oxidation-reduction process; F:oxidoreductase activity; F:acyl-[acyl-carrier-protein] desaturase activity; F:metal ion binding; C:chloroplast			13.742	4.38806	1.01785e-05	0.000214997	7.198	1.9	3.343	0.318	0.307	0.154
TRINITY_DN206374_c9_g2	Picea sitchensis	XP_011620391.1dihydropyrimidinase isoform X1	P:GO:0006212; P:GO:0043562; F:GO:0004157; C:GO:0005783; C:GO:0005794	P:uracil catabolic process; P:cellular response to nitrogen levels; F:dihydropyrimidinase activity; C:endoplasmic reticulum; C:Golgi apparatus	EC:3.5.2.2	Dihydropyrimidinase	125.563	1.15004	1.0662e-05	0.000223755	10.002	9.49	11.409	4.078	5.52	5.276
TRINITY_DN197672_c0_g1							18.8618	5.20392	1.12247e-05	0.000234978	10.898	0	2.807	0.143	0.425	0
TRINITY_DN206234_c1_g2							281.051	1.44609	1.24297e-05	0.000258276	30.475	19.225	33.778	8.738	20.406	11.599
TRINITY_DN215130_c1_g5							26.6794	2.84428	1.2779e-05	0.000264555	16.144	4.58	9.024	1.776	2.418	0.944
TRINITY_DN208064_c1_g3	Papaver somniferum	XP_026434930.1protein DETOXIFICATION 48-like	P:GO:0042908; P:GO:0055085; F:GO:0015297; F:GO:0042910; C:GO:0016021	P:xenobiotic transport; P:transmembrane transport; F:antiporter activity; F:xenobiotic transmembrane transporter activity; C:integral component of membrane			307.146	1.1351	1.29988e-05	0.000266909	25.4	24.776	37.332	15.393	16.077	12.362
TRINITY_DN211446_c2_g1	Picea sitchensis	XP_002984650.1flavonoid 3'-monooxygenase	P:GO:0055114; F:GO:0004497; F:GO:0005506; F:GO:0016705; F:GO:0020037; C:GO:0016021	P:oxidation-reduction process; F:monooxygenase activity; F:iron ion binding; F:oxidoreductase activity, acting on paired donors, with incorporation or reduction of molecular oxygen; F:heme binding; C:integral component of membrane			22.8239	2.94248	1.31528e-05	0.000269641	5.054	4.056	10.375	1.228	1.014	0.772
TRINITY_DN206525_c0_g1	Pinus elliottii var. elliottii	AAL58880.1putative class IV chitinase	P:GO:0005975; P:GO:0006032; P:GO:0016998; F:GO:0004568; F:GO:0008061	P:carbohydrate metabolic process; P:chitin catabolic process; P:cell wall macromolecule catabolic process; F:chitinase activity; F:chitin binding	EC:3.2.1.14	Chitinase	51.6741	1.91604	1.45415e-05	0.000294522	42.546	33.295	61.942	16.895	13.789	9.111
TRINITY_DN208059_c0_g2							43.9483	1.77287	1.47522e-05	0.000298186	5.47	2.541	3.976	1.403	1.014	1.733
TRINITY_DN204123_c1_g1	Picea sitchensis	PKA51815.1NAC transcription factor 25	P:GO:0006355; F:GO:0003677; C:GO:0005634	P:regulation of transcription, DNA-templated; F:DNA binding; C:nucleus			125.777	1.05291	1.47578e-05	0.000298186	18.309	16.525	16.305	9.549	8.068	7.978
TRINITY_DN190309_c0_g1	Beta vulgaris subsp. vulgaris	RVX23490.1 Formamidase	F:GO:0016811	F:hydrolase activity, acting on carbon-nitrogen (but not peptide) bonds, in linear amides			238.203	1.01314	1.5138e-05	0.000304769	15.675	15.681	19.073	7.992	10.415	8.099
TRINITY_DN202729_c0_g1	Picea sitchensis	ASU44001.1UDP-glycosyltransferase UGT8	F:GO:0016757	F:transferase activity, transferring glycosyl groups			142.172	1.75855	1.54192e-05	0.000309691	24.632	21.478	24.811	8.42	9.825	4.101
TRINITY_DN201201_c0_g1							26.4063	2.63866	1.55668e-05	0.000311664	6.558	2.103	5.93	0.45	1.427	1.192
TRINITY_DN210129_c3_g2							68.6384	1.34508	1.64786e-05	0.000327064	6.419	3.138	6.054	3.114	2.359	2.282
TRINITY_DN200563_c0_g4	Pinus taeda	AEX13479.1hypothetical protein UMN_98A_01, partial					8.32895	6.94601	1.66248e-05	0.000329549	9.416	0	5.595	0	0	0
TRINITY_DN163751_c1_g1							43.6704	4.11276	1.81361e-05	0.000354939	8.69	0.662	15.557	0	1.616	0.566
TRINITY_DN215060_c5_g1	Pinus banksiana	Q50EK5.1RecName: Full=Cytochrome P450 720B2; AltName: Full=Cytochrome P450 CYPB	P:GO:0055114; F:GO:0004497; F:GO:0005506; F:GO:0016705; F:GO:0020037; C:GO:0016021	P:oxidation-reduction process; F:monooxygenase activity; F:iron ion binding; F:oxidoreductase activity, acting on paired donors, with incorporation or reduction of molecular oxygen; F:heme binding; C:integral component of membrane			10.1235	6.23443	1.87528e-05	0.000366159	13.329	0.897	13.498	0.493	0	0
TRINITY_DN215524_c1_g1	Pinus taeda	AFG58832.1hypothetical protein 0_18685_01, partial	P:GO:0006812; P:GO:0055085; P:GO:0098655; F:GO:0008324; C:GO:0016020; C:GO:0016021	P:cation transport; P:transmembrane transport; P:cation transmembrane transport; F:cation transmembrane transporter activity; C:membrane; C:integral component of membrane			97.5133	1.15666	1.97955e-05	0.000383846	17.68	14.187	24.926	11.95	12.291	11.942
TRINITY_DN212004_c0_g9	Pinus pinaster	ADM48324.1dehydrin 2	P:GO:0009415	P:response to water			545.73	1.73341	1.98475e-05	0.000384412	634.042	316.21	257.617	142.163	139.702	113.989
TRINITY_DN213995_c0_g1	Papaver somniferum	RVW69351.1Transposon TX1 uncharacterized 149 kDa protein	P:GO:0006281; P:GO:0090305; F:GO:0003677; F:GO:0004519	P:DNA repair; P:nucleic acid phosphodiester bond hydrolysis; F:DNA binding; F:endonuclease activity			87.7369	1.34655	1.98893e-05	0.000384777	4.116	1.153	3.362	1.798	1.321	1.175
TRINITY_DN198631_c0_g1	Mycosphaerella eumusae	KXS95890.1hypothetical protein AC578_2644	P:GO:0007165; F:GO:0000166; F:GO:0003924; F:GO:0005525; C:GO:0016020	P:signal transduction; F:nucleotide binding; F:GTPase activity; F:GTP binding; C:membrane			41.1064	2.24945	2.13452e-05	0.000410584	18.415	2.284	18.403	5.109	4.529	1.905
TRINITY_DN184352_c0_g1	Ananas comosus	OAY78398.1Vacuolar amino acid transporter 1	C:GO:0005774; C:GO:0005886	C:vacuolar membrane; C:plasma membrane			113.381	1.58097	2.2202e-05	0.00042351	6.728	8.102	12.808	3.344	3.02	3.715
TRINITY_DN200337_c0_g1	Picea sitchensis	ABK26589.1unknown					59.9332	1.41124	2.22185e-05	0.00042351	8.648	5.135	9.953	3.848	3.079	3.758
TRINITY_DN203025_c0_g1	Pinus taeda	AZA14754.1ASYMMETRIC LEAVES 2-like protein 39	P:GO:0010468	P:regulation of gene expression			415.378	1.04772	2.28581e-05	0.000434717	21.081	25.908	26.612	13.617	12.774	9.377
TRINITY_DN214889_c2_g2							7.51305	6.79125	2.34257e-05	0.000443507	16.869	0	22.704	0	0	0
TRINITY_DN200659_c0_g1							54.5587	1.92758	2.34839e-05	0.00044411	13.382	2.861	12.731	5.076	3.598	2.471
TRINITY_DN208502_c4_g1	Cinnamomum micranthum f. kanehirae	RWR84468.1helicase-like protein transcription factor CHR28	F:GO:0004386; F:GO:0005524; F:GO:0046872	F:helicase activity; F:ATP binding; F:metal ion binding			18.5845	2.78131	2.41136e-05	0.000454486	3.06	1.025	4.234	0.362	0.425	0.609
TRINITY_DN210742_c0_g3							14.0939	5.79529	2.42291e-05	0.000456152	3.124	0	1.169	0.526	0	0
TRINITY_DN214798_c0_g1	Coffea canephora	XP_027151443.1ammonium transporter 1 member 4-like	P:GO:0015696; P:GO:0072488; F:GO:0008519; C:GO:0005887; C:GO:0016020; C:GO:0016021	P:ammonium transport; P:ammonium transmembrane transport; F:ammonium transmembrane transporter activity; C:integral component of plasma membrane; C:membrane; C:integral component of membrane			60.7958	1.38247	2.4781e-05	0.000466022	7.763	10.824	8.535	3.41	2.843	2.265
TRINITY_DN210599_c0_g1	Beta vulgaris subsp. vulgaris	XP_010686617.1 sister chromatid cohesion protein PDS5 homolog A-B isoform X1	P:GO:0006281; P:GO:0007064; C:GO:0000785; C:GO:0005634	P:DNA repair; P:mitotic sister chromatid cohesion; C:chromatin; C:nucleus			102.458	1.30479	2.5328e-05	0.000475246	3.519	2.06	4.684	2.072	1.486	1.63
TRINITY_DN213768_c0_g1							123.87	1.37558	2.65188e-05	0.000496483	29.334	23.73	50.849	17.147	13.836	15.065
TRINITY_DN203393_c0_g2	Amborella trichopoda	XP_006846812.1cytokinin riboside 5'-monophosphate phosphoribohydrolase LOG1	P:GO:0009691; F:GO:0016799; C:GO:0005634; C:GO:0005829	P:cytokinin biosynthetic process; F:hydrolase activity, hydrolyzing N-glycosyl compounds; C:nucleus; C:cytosol			58.5832	1.67749	2.70356e-05	0.000502247	9.16	7.665	7.769	3.377	2.217	1.973
TRINITY_DN207302_c5_g7							7.59561	6.80249	2.71091e-05	0.000502408	0.736	0.694	1.073	0	0	0
TRINITY_DN214067_c0_g1							104.951	2.03115	2.7128e-05	0.000502408	46.044	15.97	30.856	14.527	8.28	8.459
TRINITY_DN214696_c0_g2	Theobroma cacao	EOY00082.1DNA/RNA polymerases superfamily protein	P:GO:0006278; P:GO:0006508; P:GO:0015074; F:GO:0003676; F:GO:0003964; F:GO:0004190; F:GO:0008270	P:RNA-dependent DNA biosynthetic process; P:proteolysis; P:DNA integration; F:nucleic acid binding; F:RNA-directed DNA polymerase activity; F:aspartic-type endopeptidase activity; F:zinc ion binding			667.429	1.18048	2.81945e-05	0.000519761	31.318	36.455	33.165	20.765	17.539	28.516
TRINITY_DN206709_c6_g1	Picea abies	XP_009391695.1 laccase-3	P:GO:0046274; P:GO:0055114; F:GO:0005507; F:GO:0052716; C:GO:0016020; C:GO:0048046	P:lignin catabolic process; P:oxidation-reduction process; F:copper ion binding; F:hydroquinone:oxygen oxidoreductase activity; C:membrane; C:apoplast	EC:1.10.3; EC:1.10.3.2	Acting on diphenols and related substances as donors; Laccase	12.5494	4.22309	2.8427e-05	0.000522901	1.141	0.374	2.826	0.153	0.047	0.051
TRINITY_DN212646_c2_g1							83.3623	2.17672	3.0545e-05	0.000556388	25.176	6.8	13.996	8.683	5.355	7.567
TRINITY_DN206355_c0_g1							132.967	2.22659	3.06539e-05	0.000557486	13.02	4.419	23.834	3.552	6.959	2.359
TRINITY_DN213086_c3_g4							11.7675	4.13698	3.07046e-05	0.000557486	18.799	1.089	16.611	1.71	0.578	0.549
TRINITY_DN213639_c4_g3	Nicotiana sylvestris	ABI34354.1Retrotransposon gag protein	P:GO:0015074; F:GO:0003676; F:GO:0008270	P:DNA integration; F:nucleic acid binding; F:zinc ion binding			48.1751	1.52994	3.16174e-05	0.000571592	5.673	4.387	6.428	2.237	2.123	1.896
TRINITY_DN164248_c0_g1	Cephalotus follicularis	GAV72827.1GFO_IDH_MocA domain-containing protein/GFO_IDH_MocA_C domain-containing protein	P:GO:0055114; F:GO:0016491	P:oxidation-reduction process; F:oxidoreductase activity			103.713	1.82396	3.29057e-05	0.000591074	6.345	6.971	13.967	2.511	3.574	2.754
TRINITY_DN213551_c0_g5							15.2668	3.00837	3.38828e-05	0.000604752	13.5	4.75	19.428	1.327	3.138	1.802
TRINITY_DN213793_c1_g2	Picea sitchensis	XP_023745665.1probable pectate lyase 5	P:GO:0045490; F:GO:0030570; F:GO:0046872	P:pectin catabolic process; F:pectate lyase activity; F:metal ion binding	EC:4.2.2.2	Pectate lyase	320.262	1.11016	3.47618e-05	0.000617169	69.982	67.582	63.159	37.089	33.593	22.76
TRINITY_DN214159_c3_g7	Picea sitchensis	ABK22230.1unknown					102.224	1.64511	3.49417e-05	0.00061971	94.966	42.038	52.928	27.025	20.677	23.017
TRINITY_DN202447_c2_g2	Picea sitchensis	ADM73188.1MADS-domain transcription factor dal3 variant 2	P:GO:0006355; F:GO:0003677	P:regulation of transcription, DNA-templated; F:DNA binding			41.4095	3.75168	3.80618e-05	0.000670805	18.319	0	14.676	3.081	0.472	0.163
TRINITY_DN198348_c0_g1	Picea sitchensis	KZV55795.1non-specific lipid-transfer protein 2-like	P:GO:0006869; F:GO:0008289; C:GO:0016020	P:lipid transport; F:lipid binding; C:membrane			2661.66	1.19284	3.81018e-05	0.000670807	293.418	264.309	563.409	185.754	224.969	160.864
TRINITY_DN213871_c0_g2							7.2508	6.74411	3.93769e-05	0.000689649	1.28	0	1.897	0	0	0
TRINITY_DN213917_c0_g5	Pinus tabuliformis	ADW94528.1putative truncated TIR-NBS-LRR protein	P:GO:0006468; P:GO:0007165; F:GO:0004672; F:GO:0005524; F:GO:0043531; C:GO:0016020; C:GO:0016021	P:protein phosphorylation; P:signal transduction; F:protein kinase activity; F:ATP binding; F:ADP binding; C:membrane; C:integral component of membrane			67.5923	1.29676	3.97997e-05	0.000695352	9.181	6.021	8.641	3.815	3.244	4.092
TRINITY_DN199129_c0_g4							75.6933	1.29296	3.98265e-05	0.000695352	114.928	58.413	131.002	49.785	38.417	44.722
TRINITY_DN209822_c0_g1	Elaeis guineensis	XP_010922461.1 putative respiratory burst oxidase homolog protein H isoform X1	P:GO:0055114; P:GO:0098869; F:GO:0004601; F:GO:0005509; F:GO:0016174; C:GO:0005886; C:GO:0016021	P:oxidation-reduction process; P:cellular oxidant detoxification; F:peroxidase activity; F:calcium ion binding; F:NAD(P)H oxidase activity; C:plasma membrane; C:integral component of membrane	EC:1.6.3.1; EC:1.11.1.7	NAD(P)H oxidase (H(2)O(2)-forming); Peroxidase	275.715	1.22788	4.04353e-05	0.00070525	15.067	16.098	26.976	7.587	9.837	8.725
TRINITY_DN211381_c6_g1							73.995	2.13958	4.17944e-05	0.000725198	4.948	2.487	4.895	0.954	1.486	0.566
TRINITY_DN214968_c2_g5	Pyrus x bretschneideri	XP_004306738.1 C-terminal binding protein AN	P:GO:0006520; P:GO:0055114; F:GO:0004617; C:GO:0016020; C:GO:0016021	P:cellular amino acid metabolic process; P:oxidation-reduction process; F:phosphoglycerate dehydrogenase activity; C:membrane; C:integral component of membrane			67.6264	1.79951	4.26006e-05	0.000738425	9.576	7.633	14.073	4.32	2.383	4.255
TRINITY_DN142365_c0_g1							42.0792	2.79819	4.2929e-05	0.000741825	21.54	12.319	12.291	4.1	2.359	0.892
TRINITY_DN215405_c2_g1							87.4604	1.2411	4.31741e-05	0.000745296	23.054	16.45	33.673	11.369	12.432	14.104
TRINITY_DN211115_c1_g4	Picea abies	AEG80317.1TT2-like protein	F:GO:0003677; C:GO:0005634	F:DNA binding; C:nucleus			112.362	1.55109	4.37316e-05	0.000754147	15.451	27.135	30.147	9.966	8.634	6.529
TRINITY_DN215130_c1_g4							170.352	3.93309	4.41856e-05	0.000759641	149.86	26.388	66.943	14.538	4.022	3.054
TRINITY_DN214724_c0_g3							228.011	1.05918	4.63336e-05	0.000792522	49.456	48.891	63.312	32.496	21.467	27.659
TRINITY_DN207973_c1_g1	Aureobasidium pullulans EXF-150	KEQ82830.1CAT1 catalase	P:GO:0006979; P:GO:0042744; P:GO:0055114; P:GO:0098869; F:GO:0004096; F:GO:0020037; F:GO:0046872	P:response to oxidative stress; P:hydrogen peroxide catabolic process; P:oxidation-reduction process; P:cellular oxidant detoxification; F:catalase activity; F:heme binding; F:metal ion binding	EC:1.11.1.7; EC:1.11.1.6	Peroxidase; Catalase	13.6371	3.60989	4.80235e-05	0.000817274	1.429	0.246	2.73	0.263	0.13	0.129
TRINITY_DN206260_c0_g5	Pinus tabuliformis	AFP89969.1dehydrin 9	P:GO:0009415	P:response to water			956.632	2.18664	4.9433e-05	0.000837028	1922.83	755.278	874.078	297.493	301.531	281.836
TRINITY_DN183029_c0_g1	Cajanus cajan	KYP73629.1Ubiquitin carboxyl-terminal hydrolase 13	P:GO:0006511; P:GO:0016579; P:GO:0031647; F:GO:0004197; F:GO:0004843; C:GO:0005634; C:GO:0005829; C:GO:0016021	P:ubiquitin-dependent protein catabolic process; P:protein deubiquitination; P:regulation of protein stability; F:cysteine-type endopeptidase activity; F:thiol-dependent ubiquitin-specific protease activity; C:nucleus; C:cytosol; C:integral component of membrane	EC:3.4.22; EC:3.4.19.12	Acting on peptide bonds (peptidases); Ubiquitinyl hydrolase 1	13.5471	5.76334	5.15181e-05	0.00086537	3.668	0	0.805	0	0.059	0.06
TRINITY_DN211081_c3_g5							24.8614	2.21416	5.29799e-05	0.000886386	8.168	5.882	7.827	1.294	2.359	1.553
TRINITY_DN201766_c2_g2	Phoenix dactylifera	KZV35602.1Pol polyprotein	P:GO:0006508; F:GO:0003676; F:GO:0004190; F:GO:0008270; C:GO:0016020; C:GO:0016021	P:proteolysis; F:nucleic acid binding; F:aspartic-type endopeptidase activity; F:zinc ion binding; C:membrane; C:integral component of membrane			64.2905	2.35404	5.34457e-05	0.000891522	9.682	4.078	9.532	3.004	0.802	2.977
TRINITY_DN209654_c2_g1							20.8327	2.78845	5.3789e-05	0.000894587	11.314	1.313	9.992	2.587	1.144	0.901
TRINITY_DN211089_c2_g2							53.1704	1.53712	5.50654e-05	0.000914912	3.146	1.505	4.33	1.381	1.121	1.476
TRINITY_DN202179_c0_g2	Selaginella moellendorffii	XP_002963537.1carbon catabolite repressor protein 4 homolog 1	P:GO:0000289; F:GO:0004535; C:GO:0005634; C:GO:0005737; C:GO:0030014	P:nuclear-transcribed mRNA poly(A) tail shortening; F:poly(A)-specific ribonuclease activity; C:nucleus; C:cytoplasm; C:CCR4-NOT complex	EC:3.1.13; EC:3.1.15; EC:3.1.13.4	Acting on ester bonds; Acting on ester bonds; Poly(A)-specific ribonuclease	33.3985	2.04854	5.91205e-05	0.000975546	5.502	3.288	10.04	1.699	2.335	1.99
TRINITY_DN209490_c3_g1							88.7428	1.0689	6.03895e-05	0.000992594	22.393	11.582	23.03	10.163	10.616	11.805
TRINITY_DN206583_c5_g2							17.2519	2.76235	6.04965e-05	0.000993382	4.351	0.31	4.1	0.68	0.33	0.841
TRINITY_DN214825_c0_g1	Citrus sinensis	PNY16050.1ribonuclease H	P:GO:0006278; P:GO:0090502; F:GO:0003676; F:GO:0003964; F:GO:0004523; F:GO:0008270	P:RNA-dependent DNA biosynthetic process; P:RNA phosphodiester bond hydrolysis, endonucleolytic; F:nucleic acid binding; F:RNA-directed DNA polymerase activity; F:RNA-DNA hybrid ribonuclease activity; F:zinc ion binding			83.1241	1.19796	6.26028e-05	0.00101994	2.463	1.132	2.27	0.855	1.132	1.218
TRINITY_DN205490_c0_g4							173.205	1.46592	6.29878e-05	0.0010243	25.517	9.746	45.523	13.441	21.892	10.818
TRINITY_DN193984_c0_g2	Arabidopsis lyrata subsp. lyrata	XP_020873920.1transcription factor TCP2	P:GO:0006355; P:GO:0009637; P:GO:0009965; P:GO:0030154; P:GO:0045962; P:GO:1903508; P:GO:2000032; P:GO:2000306; F:GO:0003700; F:GO:0005515; F:GO:0043565; C:GO:0005634	P:regulation of transcription, DNA-templated; P:response to blue light; P:leaf morphogenesis; P:cell differentiation; P:positive regulation of development, heterochronic; P:positive regulation of nucleic acid-templated transcription; P:regulation of secondary shoot formation; P:positive regulation of photomorphogenesis; F:DNA-binding transcription factor activity; F:protein binding; F:sequence-sp…			163.251	1.63869	6.49732e-05	0.00105353	8.467	21.104	16.151	4.605	3.102	5.096
TRINITY_DN211608_c0_g1							68.2106	1.44239	6.5287e-05	0.0010576	4.82	4.056	6.821	3.289	4.234	3.869
TRINITY_DN200563_c1_g1							7.52763	6.80192	6.61891e-05	0.00107118	2.847	1.132	1.121	0	0	0
TRINITY_DN193506_c0_g1	Physcomitrella patens	XP_024403438.1LOB domain-containing protein 6-like	F:GO:0004088	F:carbamoyl-phosphate synthase (glutamine-hydrolyzing) activity	EC:6.3.5.5	Carbamoyl-phosphate synthase (glutamine-hydrolyzing)	59.9964	1.2699	6.63717e-05	0.0010731	15.59	11.7	14.101	6.293	6.098	6.306
TRINITY_DN214054_c1_g3	Manihot esculenta	OAY46528.1hypothetical protein MANES_06G006900	C:GO:0005773; C:GO:0016021	C:vacuole; C:integral component of membrane			24.7476	3.28703	6.85891e-05	0.0010984	37.353	4.302	12.281	1.677	4.046	2.728
TRINITY_DN213057_c6_g2	Pinus taeda	XP_008370158.1 probable LRR receptor-like serine/threonine-protein kinase At3g47570	P:GO:0016310; F:GO:0016301; C:GO:0016020	P:phosphorylation; F:kinase activity; C:membrane			80.9178	1.34368	7.24308e-05	0.00115225	64.544	25.001	46.988	19.899	19.379	23.644
TRINITY_DN214097_c0_g2	Cycas rumphii	CBA12007.1putative auxin response factor 10/16/17	P:GO:0009725; P:GO:0050794	P:response to hormone; P:regulation of cellular process			18.4284	5.57902	7.33978e-05	0.00116543	8.115	0	1.054	0.219	0	0
TRINITY_DN202008_c0_g1	Coffea arabica	XP_027098368.1wee1-like protein kinase isoform X2	P:GO:0045786; F:GO:0004672	P:negative regulation of cell cycle; F:protein kinase activity			27.3388	2.34007	7.54009e-05	0.0011905	8.754	3.117	5.384	1.721	2.135	0.961
TRINITY_DN196707_c0_g2	Picea sitchensis	GAV75412.1Choline_transpo domain-containing protein	P:GO:0055085; F:GO:0022857; C:GO:0016021	P:transmembrane transport; F:transmembrane transporter activity; C:integral component of membrane			85.8125	1.11591	8.32606e-05	0.00129755	9.074	5.156	6.84	3.278	3.892	3.861
TRINITY_DN209071_c0_g3							80.4357	1.68351	8.62754e-05	0.00133343	24.984	22.684	39.612	10.371	9.979	8.124
TRINITY_DN207436_c0_g1	Aureobasidium pullulans EXF-150	OBW65413.1Peptide transport protein PTR2					30.7757	2.00787	8.74342e-05	0.0013501	8.157	1.58	12.933	3.059	2.937	1.939
TRINITY_DN210353_c1_g4							95.6428	1.3252	8.81701e-05	0.00135772	11.047	7.27	6.763	4.254	4.234	2.677
TRINITY_DN200452_c0_g1	Picea glauca	ABA54793.1late embryogenesis abundant protein					93.2289	1.73592	9.11642e-05	0.00140126	18.703	13.674	11.735	6.819	3.515	3.56
TRINITY_DN214331_c3_g2	Gnetum gnemon	AJP33513.1NADH dehydrogenase subunit 5 (mitochondrion)	P:GO:0015990; P:GO:0042773; F:GO:0008137; C:GO:0005747; C:GO:0016021	P:electron transport coupled proton transport; P:ATP synthesis coupled electron transport; F:NADH dehydrogenase (ubiquinone) activity; C:mitochondrial respiratory chain complex I; C:integral component of membrane	EC:7.1.1.2; EC:1.6.5.11; EC:1.6.99.3	NADH:ubiquinone reductase (H(+)-translocating); NADH dehydrogenase (quinone); NADH dehydrogenase	421.831	1.05498	9.20898e-05	0.00141291	38.526	27.637	52.976	27.814	22.446	16.188
TRINITY_DN207427_c1_g1	Cajanus cajan	KYP74877.1Retrovirus-related Pol polyprotein from transposon TNT 1-94	P:GO:0006952; P:GO:0015074; P:GO:0055114; F:GO:0000166; F:GO:0003676; F:GO:0005506; F:GO:0008270; F:GO:0016705; F:GO:0020037; F:GO:0043531	P:defense response; P:DNA integration; P:oxidation-reduction process; F:nucleotide binding; F:nucleic acid binding; F:iron ion binding; F:zinc ion binding; F:oxidoreductase activity, acting on paired donors, with incorporation or reduction of molecular oxygen; F:heme binding; F:ADP binding			66.7483	1.52812	9.56975e-05	0.00145893	2.975	1.1	1.954	0.877	1.097	0.661
TRINITY_DN204818_c0_g1	Pinus taeda	RVW53252.1Transposon TX1 uncharacterized 149 kDa protein	P:GO:0044237; P:GO:0044238; P:GO:0071704	P:cellular metabolic process; P:primary metabolic process; P:organic substance metabolic process			287.889	1.65797	9.63588e-05	0.00146505	28.332	29.431	71.934	13.967	18.153	19.045
TRINITY_DN199712_c0_g1							38.7408	1.74184	0.00010368	0.00156226	7.507	4.27	11.438	2.554	3.279	3.38
TRINITY_DN200186_c0_g1	Camelina sativa	XP_019093668.1PREDICTED: uncharacterized protein LOC109129628					194.804	1.31902	0.000104003	0.00156572	44.913	12.938	26.612	14.888	17.551	11.256
TRINITY_DN205918_c0_g1	Picea sitchensis	ABK24390.1unknown	P:GO:0007275; P:GO:0030154	P:multicellular organism development; P:cell differentiation			10.3936	4.71546	0.000105863	0.00158804	0.992	0	1.906	0.11	0.071	0
TRINITY_DN209705_c2_g1	Papaver somniferum	XP_026397425.1protein GLUTAMINE DUMPER 3-like	P:GO:0080143; C:GO:0016020; C:GO:0016021	P:regulation of amino acid export; C:membrane; C:integral component of membrane			72.5276	1.32607	0.000111831	0.00166275	14.15	13.258	17.665	6.019	8.115	6.108
TRINITY_DN213837_c0_g2	Physcomitrella patens	XP_024394921.1protein JINGUBANG-like	P:GO:0016310; F:GO:0016301	P:phosphorylation; F:kinase activity			32.8475	1.79144	0.000120461	0.00176457	7.486	7.611	7.482	1.677	2.642	1.99
TRINITY_DN186021_c0_g1							92.0433	2.41087	0.000125437	0.00182475	23.949	11.219	23.413	2.324	2.347	9.325
TRINITY_DN202815_c0_g1							149.215	1.41108	0.000125794	0.00182678	10.78	11.113	20.127	6.655	5.485	6.331
TRINITY_DN214224_c4_g2							47.8503	1.71253	0.000125982	0.00182794	3.849	2.402	6.677	1.886	1.191	2.068
TRINITY_DN214942_c1_g2							67.3302	1.33276	0.000126802	0.00183634	19.396	7.195	13.412	7.028	6.652	4.701
TRINITY_DN200430_c0_g1	Handroanthus impetiginosus	XP_002323768.3ethylene-responsive transcription factor ERF084	P:GO:0006355; F:GO:0003677; F:GO:0003700; C:GO:0005634	P:regulation of transcription, DNA-templated; F:DNA binding; F:DNA-binding transcription factor activity; C:nucleus			11.2675	4.40689	0.000127923	0.00184972	0.864	1.046	2.721	0.066	0.13	0.06
TRINITY_DN212265_c0_g3	Pinus taeda/Pinus radiata	AEO13438.1cinnamoyl-CoA reductase	P:GO:0055114; F:GO:0016616; F:GO:0016621	P:oxidation-reduction process; F:oxidoreductase activity, acting on the CH-OH group of donors, NAD or NADP as acceptor; F:cinnamoyl-CoA reductase activity	EC:1.2.1.44	Cinnamoyl-CoA reductase	80.7487	1.52519	0.000134028	0.00192477	23.224	18.115	22.733	11.545	6.086	6.46
TRINITY_DN194172_c0_g1	Taxus wallichiana var. chinensis	AAZ79451.1flavonoid 3'5'-hydroxylase	P:GO:0055114; F:GO:0004497; F:GO:0005506; F:GO:0016705; F:GO:0020037; C:GO:0016021	P:oxidation-reduction process; F:monooxygenase activity; F:iron ion binding; F:oxidoreductase activity, acting on paired donors, with incorporation or reduction of molecular oxygen; F:heme binding; C:integral component of membrane			213.134	1.24371	0.000137649	0.00196837	18.053	9.682	16.496	7.795	9.696	4.959
TRINITY_DN193881_c0_g2	Picea sitchensis	ABR16714.1unknown					44.1141	1.48064	0.000139543	0.00198702	8.776	3.459	6.591	2.796	2.701	2.968
TRINITY_DN213017_c0_g1							352.304	1.1477	0.000141324	0.00201066	35.882	35.302	63.456	19.767	26.94	21.833
TRINITY_DN209354_c0_g1	Phytophthora sojae	XP_009524885.1hypothetical protein PHYSODRAFT_488734					259.313	1.59244	0.000141727	0.00201471	60.172	30.188	45.954	28.143	12.715	11.487
TRINITY_DN214292_c0_g1	Pinus taeda	XP_010109484.2lysM domain receptor-like kinase 3	P:GO:0016310; F:GO:0016301	P:phosphorylation; F:kinase activity			103.209	2.73974	0.000145919	0.00205865	13.606	0.278	13.21	2.927	3.149	0.377
TRINITY_DN208010_c0_g1	Pinus tabuliformis	AGC13143.1DHAR class glutathione S-transferase	P:GO:0055114; P:GO:0098869; F:GO:0004364; F:GO:0045174	P:oxidation-reduction process; P:cellular oxidant detoxification; F:glutathione transferase activity; F:glutathione dehydrogenase (ascorbate) activity	EC:2.5.1.18; EC:1.8.5.1	Glutathione transferase; Glutathione dehydrogenase (ascorbate)	22.5371	2.683	0.000149528	0.00210076	2.772	1.793	7.07	0.614	0.979	0.678
TRINITY_DN191597_c0_g1							10.2379	4.28427	0.000150201	0.00210845	5.694	0	2.28	0.175	0.259	0.154
TRINITY_DN206526_c0_g1							34.5906	1.75654	0.0001506	0.00211054	41.981	10.419	32.59	9.823	11.052	10.346
TRINITY_DN215544_c6_g1	Marchantia polymorpha subsp. ruderalis	OAE30755.1hypothetical protein AXG93_2265s1140					11.7454	3.58535	0.00015097	0.00211395	2.41	1.473	5.46	0.428	0.283	0.275
TRINITY_DN208638_c2_g7	Picea engelmannii x Picea glauca	ABD52115.1dirigent-like protein pDIR4	C:GO:0048046	C:apoplast			359.92	1.3756	0.000157365	0.00219075	47.91	25.363	95.433	33.154	26.28	15.862
TRINITY_DN174968_c0_g1							69.192	1.11929	0.00016048	0.00222675	13.5	8.519	14.887	6.907	6.44	6.469
TRINITY_DN200666_c0_g2	Prunus persica	XP_007215343.1formin-2 isoform X1	P:GO:0051225; C:GO:0070652	P:spindle assembly; C:HAUS complex			323.831	1.52848	0.000163309	0.00226041	17.797	22.737	42.927	12.948	11.005	11.153
TRINITY_DN213410_c2_g3	Picea sitchensis	ACU56978.1isopentenyl diphosphate isomerase	P:GO:0008299; F:GO:0004452; F:GO:0016787	P:isoprenoid biosynthetic process; F:isopentenyl-diphosphate delta-isomerase activity; F:hydrolase activity	EC:5.3.3.2	Isopentenyl-diphosphate Delta-isomerase	53.2234	1.71037	0.000173844	0.00238006	22.574	2.167	24.936	6.194	5.721	2.033
TRINITY_DN208545_c0_g2	Picea sitchensis	RWR76756.1Epsin domain-containing protein	P:GO:0006897; F:GO:0005543; F:GO:0030276; C:GO:0005768; C:GO:0005886; C:GO:0030125; C:GO:0043231	P:endocytosis; F:phospholipid binding; F:clathrin binding; C:endosome; C:plasma membrane; C:clathrin vesicle coat; C:intracellular membrane-bounded organelle			109.091	1.09735	0.00017631	0.00240671	12.742	5.914	13.392	4.901	7.419	4.959
TRINITY_DN212191_c6_g7	Aquilegia coerulea	PKU73048.1 50S ribosomal protein L18, chloroplastic	F:GO:0008097	F:5S rRNA binding			27.3572	1.78067	0.000176608	0.00240882	6.462	1.889	7.051	2.171	1.84	1.947
TRINITY_DN202984_c0_g1	Aureobasidium pullulans EXF-150	KEQ89670.1hypothetical protein M438DRAFT_341400					11.5016	3.34776	0.000177243	0.00241357	5.054	0.171	4.847	0.746	0.189	0.532
TRINITY_DN196638_c0_g1							12.5161	3.70864	0.000185865	0.00249956	1.365	1.206	3.334	0.077	0.153	0.309
TRINITY_DN211062_c0_g1	Asparagus officinalis	PNX55598.1ribonuclease H	P:GO:0006278; P:GO:0032259; P:GO:0090502; F:GO:0003676; F:GO:0003964; F:GO:0004523; F:GO:0008168; F:GO:0008270; F:GO:0016740; F:GO:0016779; C:GO:0016020; C:GO:0016021	P:RNA-dependent DNA biosynthetic process; P:methylation; P:RNA phosphodiester bond hydrolysis, endonucleolytic; F:nucleic acid binding; F:RNA-directed DNA polymerase activity; F:RNA-DNA hybrid ribonuclease activity; F:methyltransferase activity; F:zinc ion binding; F:transferase activity; F:nucleotidyltransferase activity; C:membrane; C:integral component of membrane			85.0146	1.31414	0.000189851	0.00253803	2.346	1.932	6.955	2.533	2.925	1.33
TRINITY_DN214420_c0_g1	Nicotiana sylvestris	EFH43824.1predicted protein	F:GO:0008757; F:GO:0010341	F:S-adenosylmethionine-dependent methyltransferase activity; F:gibberellin carboxyl-O-methyltransferase activity			68.0783	1.6014	0.000197995	0.00263387	11.591	6.234	6.552	3.092	2.241	3.912
TRINITY_DN212336_c0_g1	Helianthus annuus	OTG34130.1putative reverse transcriptase domain, Zinc finger, CCHC-type, Aspartic peptidase domain protein	P:GO:0006278; P:GO:0006355; P:GO:0006508; F:GO:0003676; F:GO:0003712; F:GO:0003964; F:GO:0004190; F:GO:0008270	P:RNA-dependent DNA biosynthetic process; P:regulation of transcription, DNA-templated; P:proteolysis; F:nucleic acid binding; F:transcription coregulator activity; F:RNA-directed DNA polymerase activity; F:aspartic-type endopeptidase activity; F:zinc ion binding			417.18	1.51636	0.000213549	0.00280581	11.655	13.867	29.458	7.795	8.894	6.1
TRINITY_DN205215_c2_g1	Pinus contorta	AFU73870.1putative monofunctional diterpene synthase	P:GO:0006952; P:GO:0008152; F:GO:0000287; F:GO:0010333; F:GO:0050554; F:GO:0050559; F:GO:0052678; C:GO:0009507; C:GO:0016021	P:defense response; P:metabolic process; F:magnesium ion binding; F:terpene synthase activity; F:abietadiene synthase activity; F:copalyl diphosphate synthase activity; F:levopimaradiene synthase activity; C:chloroplast; C:integral component of membrane	EC:4.2.3.32; EC:5.5.1.12; EC:4.2.3.18	Levopimaradiene synthase; Copalyl diphosphate synthase; Abieta-7,13-diene synthase	30.6323	1.9829	0.000233526	0.00304216	36.671	4.644	33.711	4.912	12.043	8.39
TRINITY_DN207899_c3_g11							22.2128	2.3757	0.000240345	0.00311892	5.833	7.942	7.97	0.756	2.064	1.192
TRINITY_DN204756_c0_g1							69.1203	1.98536	0.000243544	0.003158	10.397	12.191	20.989	2.324	6.004	3.698
TRINITY_DN193461_c0_g1							10.1163	5.28337	0.000244346	0.00316353	2.165	0	4.177	0.241	0	0
TRINITY_DN213054_c2_g8	Picea sitchensis	RWR97637.1ribonucleoprotein, chloroplastic isoform X1	P:GO:1901259; F:GO:0003729; C:GO:0009535	P:chloroplast rRNA processing; F:mRNA binding; C:chloroplast thylakoid membrane			114.796	1.59941	0.000245552	0.00317669	22.275	9.01	11.093	5.558	7.974	4.161
TRINITY_DN199636_c0_g1							48.9545	1.42125	0.000256394	0.00329922	6.377	5.113	9.254	3.004	2.972	2.814
TRINITY_DN215060_c5_g2	Pinus banksiana	Q50EK5.1RecName: Full=Cytochrome P450 720B2; AltName: Full=Cytochrome P450 CYPB	P:GO:0055114; F:GO:0004497; F:GO:0005506; F:GO:0016705; F:GO:0020037; C:GO:0016021	P:oxidation-reduction process; F:monooxygenase activity; F:iron ion binding; F:oxidoreductase activity, acting on paired donors, with incorporation or reduction of molecular oxygen; F:heme binding; C:integral component of membrane			35.7493	1.77316	0.000261015	0.00334333	45.574	12.255	36.288	14.263	13.47	8.51
TRINITY_DN211479_c0_g4	Picea sitchensis	ABK24775.1unknown	C:GO:0016020; C:GO:0016021	C:membrane; C:integral component of membrane			30.4824	1.82314	0.000263484	0.00337239	2.548	3.758	3.717	0.8	1.097	0.815
TRINITY_DN206817_c3_g1	Pinus tabuliformis	AGR53805.1DAL19 protein	P:GO:0006355; F:GO:0003677	P:regulation of transcription, DNA-templated; F:DNA binding			80.0541	1.0923	0.000265398	0.00339431	11.985	7.59	10.978	4.473	7.514	5.782
TRINITY_DN205521_c0_g1	Picea sitchensis	ABK23593.1unknown	C:GO:0016020; C:GO:0016021	C:membrane; C:integral component of membrane			70.3466	1.87175	0.000268431	0.00342742	82.629	25.31	41.298	15.009	22.588	12.225
TRINITY_DN197488_c0_g1	Ensete ventricosum	OVA06489.1Tetratricopeptide repeat-containing domain	P:GO:0006396	P:RNA processing			25.9191	2.07783	0.000269882	0.00344119	3.018	0.961	1.59	0.614	0.59	0.489
TRINITY_DN210899_c3_g3	Picea sitchensis	ADE76398.1unknown					17.4393	2.32027	0.000273988	0.00349091	8.157	1.537	6.514	0.998	1.934	1.793
TRINITY_DN205738_c0_g1	Picea sitchensis	XP_020241430.17-deoxyloganetin glucosyltransferase-like	F:GO:0008194	F:UDP-glycosyltransferase activity			66.824	3.03253	0.000275646	0.00350938	33.461	1.591	13.804	4.363	8.221	3.861
TRINITY_DN188309_c1_g1							16.7656	2.41713	0.000282344	0.00358111	2.079	0.897	1.188	0.351	0.224	0.292
TRINITY_DN213695_c0_g3	Picea sitchensis	OIC45200.130S ribosomal protein S17	P:GO:0006412; F:GO:0003735; C:GO:0022627	P:translation; F:structural constituent of ribosome; C:cytosolic small ribosomal subunit			31.6424	3.55506	0.000283877	0.00359514	79.419	0.299	57.813	12.597	2.56	0.806
TRINITY_DN214561_c3_g2	Picea sitchensis	ABK26685.1unknown	P:GO:0055114; F:GO:0016491; F:GO:0046872	P:oxidation-reduction process; F:oxidoreductase activity; F:metal ion binding			26.2562	2.58914	0.000285413	0.00361187	12.284	1.228	17.588	3.684	2.831	0.755
TRINITY_DN198078_c0_g5							30.9768	2.33226	0.000287358	0.00362788	7.048	5.807	10.298	2.829	1.333	0.969
TRINITY_DN210441_c0_g1							164.475	1.09575	0.000290545	0.00366109	29.793	28.907	45.446	18.857	20.276	14.764
TRINITY_DN213829_c1_g2	Coffea arabica	XP_027065828.1potassium channel AKT1-like isoform X1	P:GO:0034765; P:GO:0071805; F:GO:0005249; C:GO:0016021	P:regulation of ion transmembrane transport; P:potassium ion transmembrane transport; F:voltage-gated potassium channel activity; C:integral component of membrane			65.6783	1.13268	0.000291358	0.0036678	28.46	18.809	30.837	14.538	14.496	16.3
TRINITY_DN212121_c6_g2	Vitis vinifera	RVW87536.1Pentatricopeptide repeat-containing protein, chloroplastic	P:GO:0009793; F:GO:0008270	P:embryo development ending in seed dormancy; F:zinc ion binding			73.0747	1.46144	0.000299227	0.00374724	11.484	9.682	16.688	6.052	3.314	4.727
TRINITY_DN201101_c0_g2	Picea sitchensis	XP_010676988.1 probable glucan 1,3-beta-glucosidase A	P:GO:0007163; P:GO:0008152; P:GO:0016477; P:GO:0051017; F:GO:0016798; F:GO:0051015; C:GO:0005737; C:GO:0015629	P:establishment or maintenance of cell polarity; P:metabolic process; P:cell migration; P:actin filament bundle assembly; F:hydrolase activity, acting on glycosyl bonds; F:actin filament binding; C:cytoplasm; C:actin cytoskeleton			50.4989	1.38984	0.000299475	0.00374755	5.321	9.501	3.669	2.324	1.557	1.922
TRINITY_DN207136_c0_g1							108.218	1.17349	0.000307405	0.00382122	7.219	4.942	9.216	3.157	4.753	3.294
TRINITY_DN211876_c0_g1							34.5483	1.56622	0.00031208	0.00387361	3.37	1.345	2.232	1.754	1.097	0.841
TRINITY_DN202914_c0_g1							49.9315	1.74166	0.000321747	0.00398772	2.868	0.971	4.273	1.59	0.861	0.849
TRINITY_DN212809_c0_g2	Brassica cretica	XP_014509459.1probable galacturonosyltransferase 4	P:GO:0045489; P:GO:0071555; F:GO:0047262; C:GO:0000139	P:pectin biosynthetic process; P:cell wall organization; F:polygalacturonate 4-alpha-galacturonosyltransferase activity; C:Golgi membrane	EC:2.4.1.43	Polygalacturonate 4-alpha-galacturonosyltransferase	64.265	1.3292	0.00032868	0.0040587	3.22	2.423	4.253	1.71	1.156	1.716
TRINITY_DN201817_c0_g1	Aureobasidium pullulans EXF-150	KEQ85032.1hypothetical protein M438DRAFT_334868					8.96404	4.06418	0.00033037	0.00407359	5.428	0.267	6.533	0.57	0	0.523
TRINITY_DN198699_c0_g2	Nelumbo nucifera	XP_010277406.1 AT-hook motif nuclear-localized protein 22	P:GO:0010228; F:GO:0003680; F:GO:0003700; C:GO:0005634	P:vegetative to reproductive phase transition of meristem; F:AT DNA binding; F:DNA-binding transcription factor activity; C:nucleus			69.7268	1.28142	0.000334032	0.00410972	7.656	5.828	8.794	2.818	2.996	4.59
TRINITY_DN213542_c1_g3	Amborella trichopoda	KZV43583.1Embryo sac development arrest 6					50.1095	1.54595	0.00033574	0.0041247	7.869	4.889	5.489	3.07	2.111	1.879
TRINITY_DN207627_c0_g3	Picea sitchensis	XP_021679808.1disease resistance protein TAO1-like	P:GO:0006952; P:GO:0007165; F:GO:0000166; F:GO:0003677; F:GO:0043531	P:defense response; P:signal transduction; F:nucleotide binding; F:DNA binding; F:ADP binding			75.7521	10.1245	0.000344773	0.00422334	2.666	0	14.417	0	0	0
TRINITY_DN208526_c0_g6	Picea sitchensis	XP_018851447.1 4-coumarate--CoA ligase-like 5 isoform X2	P:GO:0009611; P:GO:0009617; P:GO:0009695; P:GO:0009753; F:GO:0016405; C:GO:0005777	P:response to wounding; P:response to bacterium; P:jasmonic acid biosynthetic process; P:response to jasmonic acid; F:CoA-ligase activity; C:peroxisome			62.8274	1.191	0.000354851	0.00432877	6.569	4.942	6.639	2.719	3.503	2.634
TRINITY_DN205003_c2_g3	Cucumis sativus	XP_004137762.1 L-type lectin-domain containing receptor kinase S.4	P:GO:0002229; P:GO:0006468; P:GO:0042742; F:GO:0004675; F:GO:0005524; F:GO:0030246; C:GO:0005886; C:GO:0016021	P:defense response to oomycetes; P:protein phosphorylation; P:defense response to bacterium; F:transmembrane receptor protein serine/threonine kinase activity; F:ATP binding; F:carbohydrate binding; C:plasma membrane; C:integral component of membrane	EC:2.7.11	Transferring phosphorus-containing groups	49.0518	1.43311	0.000367638	0.00446734	11.953	8.583	13.948	3.75	6.216	4.478
TRINITY_DN214502_c1_g2							375.794	1.55307	0.000367876	0.00446734	72.691	42.016	197.246	44.249	68.777	49.166
TRINITY_DN199175_c0_g1							9.06791	3.73283	0.000373223	0.00451922	3.636	0	2.644	0.143	0.436	0.137
TRINITY_DN212399_c1_g3	Picea sitchensis	AKH04259.1putative hydroxylase	P:GO:0055114; F:GO:0005506; F:GO:0016705; F:GO:0020037; C:GO:0016020	P:oxidation-reduction process; F:iron ion binding; F:oxidoreductase activity, acting on paired donors, with incorporation or reduction of molecular oxygen; F:heme binding; C:membrane			97.9095	1.41362	0.000384211	0.00463559	6.174	4.547	9.561	3.541	1.982	3.612
TRINITY_DN181230_c0_g4	Ziziphus jujuba	XP_016507735.1 mavicyanin-like	C:GO:0016020	C:membrane			27.9114	1.69956	0.000390088	0.0046964	4.884	3.363	3.803	1.283	1.439	1.313
TRINITY_DN194004_c0_g1							27.2416	1.72463	0.000412707	0.00492567	4.052	6.01	5.326	1.447	1.309	1.57
TRINITY_DN203587_c0_g2							313.459	1.39811	0.000423415	0.0050274	95.339	63.921	93.689	40.367	43.949	17.664
TRINITY_DN205946_c0_g1	Picea sitchensis	PSS28879.1Flap endonuclease	P:GO:0090305; F:GO:0004519	P:nucleic acid phosphodiester bond hydrolysis; F:endonuclease activity			1559.89	7.12955	0.000424307	0.00502923	1428.98	3.672	2.098	5.065	3.314	6.366
TRINITY_DN197179_c0_g1	Picea sitchensis	ADE75906.1unknown					7.23667	5.72737	0.000434277	0.0051336	0.448	0.16	1.083	0	0.047	0
TRINITY_DN210887_c6_g1							35.229	1.72644	0.000461042	0.00538501	6.76	1.078	3.659	1.502	1.687	1.673
TRINITY_DN214967_c2_g6	Brachypodium distachyon	XP_003579270.1potassium transporter 6	P:GO:0071805; F:GO:0015079; C:GO:0016021	P:potassium ion transmembrane transport; F:potassium ion transmembrane transporter activity; C:integral component of membrane			21.908	1.84909	0.000468984	0.00547018	5.428	4.91	6.754	1.327	2.088	1.99
TRINITY_DN211586_c1_g1	Momordica charantia	XP_022154063.1cyanogenic beta-glucosidase-like	P:GO:0005975; F:GO:0004553	P:carbohydrate metabolic process; F:hydrolase activity, hydrolyzing O-glycosyl compounds			36.141	1.47047	0.000475788	0.00551514	6.014	5.124	5.374	1.612	2.607	2.445
TRINITY_DN183886_c0_g2							149.606	1.35615	0.000486431	0.00562689	46.385	26.826	31.699	17.531	9.389	19.809
TRINITY_DN213076_c1_g3	Picea sitchensis	ABK22716.1unknown					18.8247	2.22018	0.000523441	0.00598101	8.509	2.743	6.121	1.897	1.026	1.956
TRINITY_DN202257_c0_g1							71.0914	1.02419	0.000524276	0.00598244	6.441	5.327	5.757	2.85	3.303	3.106
TRINITY_DN209465_c2_g1	Amborella trichopoda	XP_006828081.1vacuolar protein 8					84.3768	1.17602	0.000559233	0.00631267	31.627	22.065	61.885	19.274	19.922	18.419
TRINITY_DN182607_c0_g1	Jatropha curcas	BAJ53211.1JHL23C09.7					79.3459	1.58142	0.000560447	0.00631267	19.322	14.016	45.542	9.779	12.88	9.137
TRINITY_DN197246_c0_g1							26.3169	1.79135	0.000586014	0.00653467	3.295	2.114	4.895	1.743	1.238	1.313
TRINITY_DN197595_c0_g2							8.85645	4.05738	0.000609743	0.00673398	2.794	0.544	3.631	0.121	0	0.42
TRINITY_DN212658_c1_g5	Picea sitchensis	KHN12768.1Putative carboxylesterase 13	F:GO:0016787	F:hydrolase activity			413.325	1.4336	0.000613926	0.00677573	205.511	61.925	220.888	67.031	122.528	41.659
TRINITY_DN200423_c0_g1							109.001	2.1822	0.000623526	0.00686817	18.693	6.074	29.093	8.76	1.604	5.98
TRINITY_DN53916_c0_g2							13.5912	2.44006	0.000637441	0.00698942	5.214	2.85	4.905	0.68	1.227	0.858
TRINITY_DN211258_c1_g1	Picea sitchensis	ABK22215.1unknown					229.643	1.32342	0.000651593	0.00712236	72.787	39.497	75.679	32.978	39.372	16.231
TRINITY_DN209194_c0_g1	Selaginella moellendorffii	GBC27467.1sel1 repeat domain-containing protein	P:GO:0006468; F:GO:0004672; F:GO:0005524; F:GO:0030246; C:GO:0016020; C:GO:0016021	P:protein phosphorylation; F:protein kinase activity; F:ATP binding; F:carbohydrate binding; C:membrane; C:integral component of membrane			45.0913	1.60563	0.000655889	0.00715906	2.975	2.028	3.774	1.403	1.309	0.712
TRINITY_DN177219_c0_g1	Brassica cretica	RQL93130.1hypothetical protein DY000_00019393	P:GO:0090502; F:GO:0003676; F:GO:0004523	P:RNA phosphodiester bond hydrolysis, endonucleolytic; F:nucleic acid binding; F:RNA-DNA hybrid ribonuclease activity			23.7679	1.7792	0.000666746	0.00725874	1.685	1.484	1.868	0.636	0.531	0.438
TRINITY_DN210932_c1_g2							68.0088	1.8881	0.000668451	0.00727259	112.336	93.384	43.051	19.844	18.719	22.82
TRINITY_DN215305_c1_g1							26.5202	1.67439	0.000682894	0.00740103	17.424	7.398	24.15	3.782	6.228	5.585
TRINITY_DN213086_c3_g2	Picea sitchensis	ABK23937.1unknown	P:GO:0010112	P:regulation of systemic acquired resistance			94.5476	1.57121	0.000716298	0.00770352	34.794	12.522	25.693	12.104	12.515	7.112
TRINITY_DN195452_c0_g1							50.0035	1.48831	0.000721547	0.00774019	9.138	5.284	12.53	3.75	5.107	2.9
TRINITY_DN209109_c0_g3	Pinus densiflora/Pinus sylvestris	P52769.2RecName: Full=Acetyl-coenzyme A carboxylase carboxyl transferase subunit beta, chloroplastic; Short=ACCase subunit beta; Short=Acetyl-CoA carboxylase carboxyltransferase subunit beta	P:GO:0006633; P:GO:2001295; F:GO:0003989; F:GO:0005524; F:GO:0008270; F:GO:0016743; C:GO:0009317; C:GO:0009570	P:fatty acid biosynthetic process; P:malonyl-CoA biosynthetic process; F:acetyl-CoA carboxylase activity; F:ATP binding; F:zinc ion binding; F:carboxyl- or carbamoyltransferase activity; C:acetyl-CoA carboxylase complex; C:chloroplast stroma	EC:6.4.1.2	Acetyl-CoA carboxylase	232.626	1.75082	0.000729641	0.00781705	21.273	11.999	40.254	10.196	13.635	4.118
TRINITY_DN182878_c0_g2							22.9007	3.24738	0.000739047	0.00789271	6.377	0.416	5.116	0.888	0	0.927
TRINITY_DN213229_c1_g1	Pinus taeda/Pinus radiata	PIN12149.1Ras suppressor protein (contains leucine-rich repeats)	C:GO:0005886	C:plasma membrane			104.954	1.02071	0.000741844	0.00790252	7.901	5.946	5.144	3.201	2.583	3.612
TRINITY_DN205201_c8_g1	Pinus taeda/Pinus radiata	RWR85891.1mitochondrial import inner membrane translocase subunit TIM14-1 isoform X3	P:GO:0030150; P:GO:0032781; F:GO:0001671; C:GO:0001405	P:protein import into mitochondrial matrix; P:positive regulation of ATPase activity; F:ATPase activator activity; C:PAM complex, Tim23 associated import motor			22.6455	2.32039	0.000753945	0.0080162	3.657	1.74	6.265	1.623	0.613	0.721
TRINITY_DN211846_c0_g1	Oryza sativa Japonica Group	XP_016498520.1 vacuolar protein sorting-associated protein 24 homolog 1-like	P:GO:0007034; P:GO:0015031; P:GO:0032509; P:GO:0045324; C:GO:0000815; C:GO:0005771	P:vacuolar transport; P:protein transport; P:endosome transport via multivesicular body sorting pathway; P:late endosome to vacuole transport; C:ESCRT III complex; C:multivesicular body			25.4636	2.24041	0.000756663	0.00804002	5.534	3.042	9.848	1.831	1.309	3.346
TRINITY_DN211306_c0_g1							9.26856	3.21858	0.000768414	0.00815459	10.141	4.366	6.696	1.162	0.767	0.746
TRINITY_DN203286_c0_g2							6.09539	5.49085	0.000769632	0.00816236	4.329	2.477	2.577	0	0.236	0
TRINITY_DN204137_c0_g1	Picea sitchensis	XP_019247222.1 protein MARD1-like					38.5958	1.44728	0.000799322	0.00846126	4.777	3.491	6.217	1.886	2.477	1.793
TRINITY_DN208848_c0_g1	Aureobasidium pullulans EXF-150	KEQ83724.1hypothetical protein M438DRAFT_20672	F:GO:0005199; C:GO:0005618	F:structural constituent of cell wall; C:cell wall			14.0619	3.29864	0.000800628	0.00846975	3.551	0.064	2.634	1.085	0.071	0.137
TRINITY_DN192307_c0_g2	Papaver somniferum	XP_026432023.1GATA transcription factor 18-like	P:GO:0006355; F:GO:0008270; F:GO:0043565	P:regulation of transcription, DNA-templated; F:zinc ion binding; F:sequence-specific DNA binding			18.5092	2.25261	0.000808538	0.00853198	1.44	0.971	2.548	0.384	0.318	0.583
TRINITY_DN202212_c6_g1							29.8061	1.78359	0.000825658	0.00867998	7.155	2.455	6.667	1.634	2.925	1.441
TRINITY_DN198599_c0_g5	Picea sitchensis	XP_024043686.1probable LRR receptor-like serine/threonine-protein kinase At3g47570	P:GO:0006468; P:GO:0009755; P:GO:0016310; F:GO:0000166; F:GO:0004672; F:GO:0004674; F:GO:0005524; F:GO:0016301; F:GO:0016740; C:GO:0005886; C:GO:0016020; C:GO:0016021	P:protein phosphorylation; P:hormone-mediated signaling pathway; P:phosphorylation; F:nucleotide binding; F:protein kinase activity; F:protein serine/threonine kinase activity; F:ATP binding; F:kinase activity; F:transferase activity; C:plasma membrane; C:membrane; C:integral component of membrane			13.021	2.73264	0.000844061	0.00886238	1.354	1.132	1.811	0.121	0.389	0.223
TRINITY_DN200058_c0_g1	Aspergillus lentulus	XP_662849.1predicted protein					25.7842	2.82898	0.000900716	0.00937967	21.134	2.413	30.013	4.681	5.072	0.412
TRINITY_DN211648_c0_g2	Nelumbo nucifera	XP_010248044.1 gibberellin-regulated protein 6-like					84.4923	1.90432	0.000901131	0.00937967	26.988	17.261	29.946	12.805	5.567	3.56
TRINITY_DN208215_c0_g4							62.546	1.23677	0.000902825	0.0093915	6.76	6.618	5.087	2.215	2.253	3.054
TRINITY_DN211073_c0_g1	Picea sitchensis	WP_094869778.1GTP-binding protein	P:GO:0006629; F:GO:0005525; C:GO:0016020; C:GO:0016021	P:lipid metabolic process; F:GTP binding; C:membrane; C:integral component of membrane			84.0216	1.40173	0.000935263	0.00968107	3.764	3.982	7.472	2.785	1.545	1.947
TRINITY_DN202179_c0_g1	Coffea arabica	XP_027091149.1carbon catabolite repressor protein 4 homolog 1-like isoform X3	P:GO:0000289; P:GO:0090503; F:GO:0000175; F:GO:0004535; C:GO:0005634; C:GO:0005737; C:GO:0030014	P:nuclear-transcribed mRNA poly(A) tail shortening; P:RNA phosphodiester bond hydrolysis, exonucleolytic; F:3'-5'-exoribonuclease activity; F:poly(A)-specific ribonuclease activity; C:nucleus; C:cytoplasm; C:CCR4-NOT complex			22.5572	1.94495	0.00094471	0.00976084	4.255	2.893	7.319	1.688	1.71	1.167
TRINITY_DN206588_c5_g10	Cunninghamia lanceolata	AFX98068.1cinnamoyl-CoA reductase	P:GO:0055114; F:GO:0016616; F:GO:0016621	P:oxidation-reduction process; F:oxidoreductase activity, acting on the CH-OH group of donors, NAD or NADP as acceptor; F:cinnamoyl-CoA reductase activity	EC:1.2.1.44	Cinnamoyl-CoA reductase	58.8686	1.31344	0.000949662	0.00979998	6.707	7.344	7.942	3.53	1.982	3.414
TRINITY_DN206800_c2_g3	Pinus taeda	RVW82313.1WD repeat-containing protein 26-like	P:GO:0006278; F:GO:0003964; C:GO:0005739	P:RNA-dependent DNA biosynthetic process; F:RNA-directed DNA polymerase activity; C:mitochondrion			93.6223	1.02992	0.000956005	0.00984732	4.489	3.811	5.729	2.631	2.064	3.037
TRINITY_DN213588_c3_g1							103.399	1.07776	0.00097183	0.00997088	12.572	6.554	7.779	5.065	5.78	4.015
TRINITY_DN214144_c5_g1	Zea mays	XP_023157287.1protein binding protein isoform X1	F:GO:0003824	F:catalytic activity			14.952	2.18815	0.00097274	0.00997088	1.813	0.737	2.366	0.504	0.413	0.48
TRINITY_DN191758_c0_g1							40.7375	1.42176	0.000984971	0.0100778	32.938	18.564	61.415	13.989	18.294	15.133
TRINITY_DN205214_c1_g1							59.2935	1.12755	0.000998543	0.0101899	20.26	13.183	16.678	9.56	7.95	8.004
TRINITY_DN210458_c0_g1							100.527	1.21885	0.00100278	0.0102193	4.82	6.32	9.206	3.355	2.701	3.217
TRINITY_DN206817_c3_g6	Picea sitchensis	ABK26493.1unknown					31.1934	1.71126	0.00100366	0.0102193	6.643	6.512	6.342	1.875	2.831	1.338
TRINITY_DN178426_c0_g2							10.4256	2.79822	0.00100594	0.0102302	0.992	0.608	1.236	0.208	0.094	0.197
TRINITY_DN214994_c2_g3	Vitis vinifera	RVX03467.1Transposon Ty3-I Gag-Pol polyprotein	P:GO:0015074; F:GO:0003676	P:DNA integration; F:nucleic acid binding			42.4282	1.4226	0.00102022	0.0103442	1.173	1.452	1.676	0.658	0.472	0.515
TRINITY_DN209215_c0_g6	Picea sitchensis	OMP10351.1Lipase, class 3	P:GO:0006629; F:GO:0008970; F:GO:0052739; F:GO:0052740	P:lipid metabolic process; F:phospholipase A1 activity; F:phosphatidylserine 1-acylhydrolase activity; F:1-acyl-2-lysophosphatidylserine acylhydrolase activity	EC:3.1.1.32; EC:3.1.1.1	Phospholipase A(1); Carboxylesterase	41.8656	1.31563	0.00105152	0.0106168	15.515	18.35	17.148	7.729	6.393	5.37
TRINITY_DN210895_c0_g1							56.0203	1.25459	0.00105689	0.0106518	3.092	1.825	4.598	1.447	1.805	1.707
TRINITY_DN212575_c3_g5							6.4573	4.61874	0.00105948	0.0106715	2.069	0.128	2.328	0.143	0.13	0
TRINITY_DN184305_c0_g2							24.4145	1.79636	0.00107643	0.0108034	5.683	4.046	6.936	1.864	1.25	2.428
TRINITY_DN204102_c0_g2	Capsicum annuum	XP_016570551.1 probable LRR receptor-like serine/threonine-protein kinase At3g47570	P:GO:0006468; F:GO:0004672; C:GO:0016020	P:protein phosphorylation; F:protein kinase activity; C:membrane			233.79	1.04134	0.00110561	0.0110437	69.321	38.643	40.426	26.499	30.585	21.267
TRINITY_DN206014_c1_g1	Pinus banksiana	AFU73869.1putative monofunctional diterpene synthase	P:GO:0006952; P:GO:0008152; F:GO:0000287; F:GO:0010333; F:GO:0050554; F:GO:0050559; F:GO:0052678; F:GO:0102161; C:GO:0009507	P:defense response; P:metabolic process; F:magnesium ion binding; F:terpene synthase activity; F:abietadiene synthase activity; F:copalyl diphosphate synthase activity; F:levopimaradiene synthase activity; F:copal-8-ol diphosphate synthase activity; C:chloroplast	EC:4.2.3.32; EC:5.5.1.12; EC:4.2.3.18; EC:4.2.1.133	Levopimaradiene synthase; Copalyl diphosphate synthase; Abieta-7,13-diene synthase; Copal-8-ol diphosphate hydratase	57.4916	1.05383	0.00110651	0.0110461	24.93	3.747	28.155	9.801	11.842	10.638
TRINITY_DN207296_c2_g3	Tarenaya hassleriana	XP_010545222.1 polyadenylate-binding protein RBP45C-like	F:GO:0003729; C:GO:0005829	F:mRNA binding; C:cytosol			29.9656	1.65522	0.00116522	0.01155	1.887	1.078	2.155	0.899	0.602	0.48
TRINITY_DN215136_c23_g2	Dothistroma septosporum NZE10	EME38020.1hypothetical protein DOTSEDRAFT_141292, partial					49.1044	9.49994	0.00117189	0.0115969	169.438	15.18	22.129	0	0	0
TRINITY_DN214334_c1_g1							52.2365	1.42395	0.00117368	0.0115997	11.9	5.935	6.39	3.98	4.753	3.552
TRINITY_DN205740_c1_g10	Picea sitchensis	XP_003527521.1probable nucleoredoxin 2 isoform X1	P:GO:0035556; P:GO:0045454	P:intracellular signal transduction; P:cell redox homeostasis			18.8568	1.84783	0.00119342	0.011774	1.589	0.555	1.83	0.504	0.484	0.48
TRINITY_DN213948_c1_g3	Picea sitchensis	AIZ49814.1ABI3-interacting protein 2	P:GO:0032502	P:developmental process			21.6587	3.43521	0.00119526	0.0117783	6.067	0.31	15.308	1.765	1.345	0
TRINITY_DN194085_c0_g4	Picea sitchensis	XP_006827640.2acyl-coenzyme A thioesterase 8 isoform X1	P:GO:0006637; P:GO:0009062; F:GO:0047617; C:GO:0005829	P:acyl-CoA metabolic process; P:fatty acid catabolic process; F:acyl-CoA hydrolase activity; C:cytosol	EC:3.1.2.20	Acyl-CoA hydrolase	24.8221	2.54647	0.00121169	0.0119124	4.041	0.555	3.822	0.197	0.566	1.012
TRINITY_DN209449_c0_g3	Macleaya cordata	OVA01029.1ARID/BRIGHT DNA-binding domain	P:GO:0006342; P:GO:0045944; F:GO:0000977; F:GO:0001228; C:GO:0005634; C:GO:0032991	P:chromatin silencing; P:positive regulation of transcription by RNA polymerase II; F:RNA polymerase II regulatory region sequence-specific DNA binding; F:DNA-binding transcription activator activity, RNA polymerase II-specific; C:nucleus; C:protein-containing complex			125.976	1.23685	0.00121305	0.0119187	16.645	17.592	18.096	6.315	10.863	5.328
TRINITY_DN182215_c0_g1							46.7294	1.3596	0.00124371	0.0121702	2.879	2.327	4.617	1.612	1.38	1.553
TRINITY_DN207331_c0_g4							50.3946	2.47884	0.00127758	0.0124366	10.055	0.993	1.533	1.239	0.979	0.969
TRINITY_DN188703_c0_g1	Monoraphidium neglectum	PYS00724.1ribonuclease H	P:GO:0090502; F:GO:0003676; F:GO:0004523	P:RNA phosphodiester bond hydrolysis, endonucleolytic; F:nucleic acid binding; F:RNA-DNA hybrid ribonuclease activity			6.89055	4.1226	0.00131528	0.012752	1.951	0.619	1.686	0	0.106	0.214
TRINITY_DN213281_c4_g3	Picea sitchensis	AXG63952.1NAC transcription factor 1 protein	P:GO:0006355; F:GO:0003677	P:regulation of transcription, DNA-templated; F:DNA binding			104.748	1.91477	0.00132073	0.0127754	5.683	9.789	14.015	1.842	4.4	1.51
TRINITY_DN215130_c1_g7							11.1709	4.03902	0.00133031	0.0128459	12.369	0.886	4.79	1.261	0.307	0
TRINITY_DN208064_c1_g4	Arabidopsis thaliana	NP_564731.1MATE efflux family protein	P:GO:0006970; P:GO:0009408; P:GO:0009646; P:GO:0009737; P:GO:0010015; P:GO:0034755; P:GO:0042908; P:GO:0055072; P:GO:1905428; F:GO:0005381; F:GO:0015297; F:GO:0042910; C:GO:0005770; C:GO:0016021; C:GO:0017119	P:response to osmotic stress; P:response to heat; P:response to absence of light; P:response to abscisic acid; P:root morphogenesis; P:iron ion transmembrane transport; P:xenobiotic transport; P:iron ion homeostasis; P:regulation of plant organ formation; F:iron ion transmembrane transporter activity; F:antiporter activity; F:xenobiotic transmembrane transporter activity; C:late endosome; C:integ…			58.3908	1.12647	0.00133579	0.0128841	23.758	21.061	25.606	9.538	13.741	10.149
TRINITY_DN214159_c3_g5	Picea sitchensis	ABK25633.1unknown					14.5231	2.5598	0.00135151	0.0129995	7.795	0.929	8.919	0.998	2.017	0.575
TRINITY_DN209298_c1_g1	Aspergillus fumigatus A1163/Aspergillus fumigatus Af293	XP_750288.1mitochondrial ADP,ATP carrier protein (Ant), putative	P:GO:0140021; P:GO:1990544; F:GO:0005471; C:GO:0005743; C:GO:0016021	P:mitochondrial ADP transmembrane transport; P:mitochondrial ATP transmembrane transport; F:ATP:ADP antiporter activity; C:mitochondrial inner membrane; C:integral component of membrane			21.3055	2.29199	0.00136124	0.0130696	5.14	2.071	3.861	1.074	1.592	0.678
TRINITY_DN211474_c0_g5	Picea sitchensis	AKH04258.1putative alcohol dehydrogenase					57.8065	1.2329	0.00137737	0.0132094	4.596	4.622	6.84	2.412	2.159	2.977
TRINITY_DN210940_c0_g3	Pinus taeda	AAM28915.1NBS, partial					76.7354	1.01981	0.00138681	0.0132923	4.884	2.306	6.629	4.035	3.94	1.879
TRINITY_DN187632_c0_g1							48.2524	1.69559	0.00141001	0.0134917	22.958	19.097	25.817	4.166	12.986	7.018
TRINITY_DN207251_c2_g2	Picea sitchensis	XP_021630494.1cysteine-rich repeat secretory protein 55	C:GO:0016021	C:integral component of membrane			29.8184	2.03609	0.0014457	0.0138018	13.457	7.761	9.972	1.403	2.383	4.804
TRINITY_DN210677_c1_g2							21.7393	3.24529	0.00145772	0.0139086	41.896	0.502	11.496	3.168	4.742	0.506
TRINITY_DN211424_c4_g3	Malus domestica	XP_008371324.1 alpha-galactosidase	P:GO:0005975; P:GO:0008152; F:GO:0003824; F:GO:0004553; F:GO:0004557; F:GO:0016787; F:GO:0016798; F:GO:0052692; C:GO:0009505	P:carbohydrate metabolic process; P:metabolic process; F:catalytic activity; F:hydrolase activity, hydrolyzing O-glycosyl compounds; F:alpha-galactosidase activity; F:hydrolase activity; F:hydrolase activity, acting on glycosyl bonds; F:raffinose alpha-galactosidase activity; C:plant-type cell wall			46.1966	1.21716	0.00146285	0.0139339	10.45	5.999	10.873	4.846	3.409	3.792
TRINITY_DN194748_c0_g1	Parasponia andersonii	PON64906.1Desiccation-related protein					1470.51	2.08323	0.0014898	0.0140949	287.18	287.879	145.218	51.934	78.65	25.643
TRINITY_DN173534_c0_g1	Selaginella moellendorffii	XP_024542551.1NFX1-type zinc finger-containing protein 1	P:GO:0006355; P:GO:0031048; P:GO:0031508; F:GO:0003700; F:GO:0003723; F:GO:0008270; F:GO:0016787; F:GO:0046872; C:GO:0005634; C:GO:0031380	P:regulation of transcription, DNA-templated; P:chromatin silencing by small RNA; P:pericentric heterochromatin assembly; F:DNA-binding transcription factor activity; F:RNA binding; F:zinc ion binding; F:hydrolase activity; F:metal ion binding; C:nucleus; C:nuclear RNA-directed RNA polymerase complex			18.6404	2.57554	0.00150636	0.0142276	0.917	1.569	2.462	0.45	0.259	0.172
TRINITY_DN209621_c1_g2	Hevea brasiliensis	XP_021690766.1pentatricopeptide repeat-containing protein At3g02330, mitochondrial	F:GO:0008270; F:GO:0016787	F:zinc ion binding; F:hydrolase activity			18.0852	3.2775	0.00153215	0.0144307	4.5	0.203	4.196	0.395	1.014	0
TRINITY_DN190932_c0_g1							20.6458	2.40321	0.00158574	0.014902	2.037	0.363	1.973	0.099	0.566	0.515
TRINITY_DN179228_c0_g1	Beta vulgaris subsp. vulgaris	ABA98459.1retrotransposon protein, putative, Ty3-gypsy subclass	P:GO:0006807; P:GO:0043170; P:GO:0044238; F:GO:0005488	P:nitrogen compound metabolic process; P:macromolecule metabolic process; P:primary metabolic process; F:binding			9.59144	3.06127	0.0015877	0.0149122	3.359	1.601	3.334	0.318	0.153	0.746
TRINITY_DN199526_c0_g1	Aureobasidium pullulans EXF-150	PSK36731.1Polynucleotide 5'-hydroxyl-kinase grc3	P:GO:0016310; F:GO:0016301	P:phosphorylation; F:kinase activity			8.51968	4.43351	0.00162296	0.0151419	4.905	0	3.966	0	0.613	0
TRINITY_DN200358_c0_g1	Pinus taeda	AFG43981.1hypothetical protein 0_2069_01, partial	F:GO:0016747	F:transferase activity, transferring acyl groups other than amino-acyl groups			44.2904	1.17886	0.00163025	0.0152015	17.967	3.886	19.284	6.753	8.551	8.956
TRINITY_DN208120_c0_g2	Ensete ventricosum	XP_009384627.1 butyrate--CoA ligase AAE11, peroxisomal-like	F:GO:0003824	F:catalytic activity			130.91	1.3193	0.00164116	0.0152779	7.88	8.679	15.423	3.432	3.515	5.739
TRINITY_DN209183_c0_g1	Pinus monticola	ABA03062.1putative CC-NBS-LRR protein	F:GO:0016787; F:GO:0043531	F:hydrolase activity; F:ADP binding			30.7234	1.55324	0.00165174	0.0153424	1.429	1.494	2.165	0.647	0.755	0.549
TRINITY_DN214318_c3_g7							11.0533	3.74829	0.00165888	0.0153918	10.365	0	8.88	0.406	1.934	0
TRINITY_DN198995_c0_g1							18.1737	1.92743	0.00166224	0.0154144	1.141	0.502	1.255	0.252	0.271	0.446
TRINITY_DN187121_c0_g1	Picea sitchensis	ACN40365.1unknown					21.506	1.87695	0.00172068	0.0159125	1.909	0.491	0.968	0.46	0.401	0.412
TRINITY_DN208223_c0_g1							52.4531	1.19277	0.00172181	0.0159142	5.054	3.331	6.917	3.081	2.548	2.385
TRINITY_DN207645_c0_g1	Pinus monticola	AAQ57158.1putative NBS-LRR protein C603	P:GO:0007165; F:GO:0043531	P:signal transduction; F:ADP binding			42.7111	1.2492	0.00176427	0.0162442	12.412	5.594	9.57	3.98	4.801	4.71
TRINITY_DN206622_c0_g1							54.6653	1.19095	0.00180109	0.0165289	9.895	2.978	10.892	4.681	5.52	3.166
TRINITY_DN207899_c3_g8							15.9494	2.96156	0.0018698	0.0170665	34.293	32.601	15.538	2.006	6.063	1.416
TRINITY_DN207619_c1_g2							71.0324	1.04158	0.00187734	0.0171167	19.567	11.08	12.837	11.479	8.787	14.224
TRINITY_DN199099_c0_g1	Juglans regia	XP_018813272.1 AP-2 complex subunit alpha-1-like	P:GO:0015031; P:GO:0072583; F:GO:0035615; C:GO:0030122	P:protein transport; P:clathrin-dependent endocytosis; F:clathrin adaptor activity; C:AP-2 adaptor complex			23.8991	2.03996	0.00189523	0.0172518	5.822	0.502	2.318	0.965	0.79	1.321
TRINITY_DN187462_c0_g1							5.91822	4.48051	0.00191944	0.0174215	1.781	0	2.491	0.143	0.142	0
TRINITY_DN210715_c0_g2							49.8799	1.06275	0.00192112	0.0174215	7.4	5.86	9.206	3.618	3.798	3.835
TRINITY_DN71145_c0_g1							6.97972	4.74016	0.00201746	0.0181485	3.146	3.384	6.141	0	0.507	0
TRINITY_DN214338_c2_g4	Pinus sylvestris	ADQ37306.1putative flavoprotein-containing polyamine oxidase	P:GO:0055114; F:GO:0016491	P:oxidation-reduction process; F:oxidoreductase activity			43.8429	1.51887	0.00210289	0.0187367	7.795	5.69	9.848	3.541	3.987	1.802
TRINITY_DN213455_c0_g8	Nelumbo nucifera	XP_010261742.1 probable flavin-containing monooxygenase 1	P:GO:0006897; P:GO:0055114; F:GO:0004497; F:GO:0004499; F:GO:0005044; F:GO:0016491; F:GO:0050660; F:GO:0050661; C:GO:0016020	P:endocytosis; P:oxidation-reduction process; F:monooxygenase activity; F:N,N-dimethylaniline monooxygenase activity; F:scavenger receptor activity; F:oxidoreductase activity; F:flavin adenine dinucleotide binding; F:NADP binding; C:membrane			58.2645	1.25877	0.00213908	0.019029	2.954	4.622	5.039	1.919	1.675	1.639
TRINITY_DN213410_c2_g7							8.62086	3.32188	0.00216712	0.0192377	4.255	0.705	12.262	1.14	0.743	0.36
TRINITY_DN203832_c1_g1	Juglans regia	XP_018856513.1 E3 ubiquitin-protein ligase CHFR	P:GO:0044267	P:cellular protein metabolic process			245.906	1.57658	0.00216894	0.0192438	15.654	4.11	28.509	8.935	10.061	3.088
TRINITY_DN209177_c0_g1							58.6426	1.05435	0.00220592	0.0195307	17.221	11.529	23.988	9.483	9.967	10.767
TRINITY_DN215313_c6_g1	Picea sitchensis	AAX92685.1probable aquaporin	P:GO:0055085; F:GO:0015267; C:GO:0016021	P:transmembrane transport; F:channel activity; C:integral component of membrane			961.842	1.08289	0.00231217	0.0203266	1681.08	839.823	884.204	612.978	546.858	545.15
TRINITY_DN215397_c4_g8							12.4231	2.40424	0.00233218	0.0204336	3.028	0.897	1.964	0.307	0.696	0.455
TRINITY_DN211861_c0_g4							101.388	1.06306	0.00235897	0.0205933	12.209	11.123	10.509	7.422	4.058	5.293
TRINITY_DN206532_c0_g1	Nelumbo nucifera	XP_019054700.1 zinc finger protein CONSTANS-LIKE 9	P:GO:0006413; F:GO:0003743; F:GO:0008270	P:translational initiation; F:translation initiation factor activity; F:zinc ion binding			118.678	1.12508	0.0023769	0.0207068	13.851	9.159	10.605	4.999	7.938	4.298
TRINITY_DN205676_c0_g1	Theobroma cacao	XP_017978246.1 putative UPF0481 protein At3g02645	C:GO:0016020; C:GO:0016021	C:membrane; C:integral component of membrane			22.0265	1.89417	0.00248089	0.0214244	2.719	0.769	3.65	0.713	1.026	0.746
TRINITY_DN212581_c0_g2							39.0891	1.41153	0.00253885	0.0218352	9.821	6.704	13.651	5.701	3.126	4.47
TRINITY_DN197444_c0_g4							40.0073	1.5289	0.00254114	0.02184	14.31	6.544	10.02	3.256	5.402	6.323
TRINITY_DN207532_c1_g2	Pinus pinaster	CAM58516.1putative proline-rich arabinogalactan protein 4					310.17	1.31185	0.0025759	0.0220973	355.382	446.412	251.294	123.251	163.245	61.563
TRINITY_DN193755_c0_g1							8.52959	3.60472	0.00258381	0.0221539	2.239	0	2.031	0.285	0.259	0
TRINITY_DN194835_c0_g1	Aureobasidium melanogenum CBS 110374/Aureobasidium pullulans/Aureobasidium pullulans EXF-150/Aureobasidium subglaciale EXF-2481	KEQ61803.1 ribosomal protein S3Ae	P:GO:0006412; F:GO:0003735; C:GO:0022627	P:translation; F:structural constituent of ribosome; C:cytosolic small ribosomal subunit			5.55323	4.415	0.00258918	0.022166	2.005	0.576	1.676	0	0.201	0.12
TRINITY_DN209309_c3_g2	Picea sitchensis	XP_026416566.1mRNA cap guanine-N7 methyltransferase 2	P:GO:0006370; P:GO:0106005; F:GO:0004482; C:GO:0005634; C:GO:0005845	P:7-methylguanosine mRNA capping; P:RNA 5'-cap (guanine-N7)-methylation; F:mRNA (guanine-N7-)-methyltransferase activity; C:nucleus; C:mRNA cap binding complex	EC:2.1.1.56	mRNA (guanine-N(7)-)-methyltransferase	115.139	1.02157	0.00263979	0.0224963	6.537	6.928	10.557	3.717	4.978	4.375
TRINITY_DN206535_c1_g2	Aquilegia coerulea	XP_017226826.1 oligopeptide transporter 1-like	P:GO:0055085; C:GO:0016020; C:GO:0016021	P:transmembrane transport; C:membrane; C:integral component of membrane			57.3164	1.31753	0.00265591	0.0225769	4.287	1.494	3.765	1.151	1.368	2.642
TRINITY_DN213041_c0_g2	Pinus taeda/Pinus radiata	ADM76943.1ERD sugar transporter-like protein	P:GO:0008643; P:GO:0055085; F:GO:0022857; C:GO:0016021	P:carbohydrate transport; P:transmembrane transport; F:transmembrane transporter activity; C:integral component of membrane			924.587	1.07561	0.0026819	0.0227348	71.283	98.689	101.161	29.064	65.958	29.803
TRINITY_DN202761_c1_g1							140.863	1.24502	0.00271021	0.0229373	13.574	8.337	34.621	9.253	7.62	10.175
TRINITY_DN213467_c0_g4	Pinus contorta	AEF59006.1class I chitinase	P:GO:0005975; P:GO:0006032; P:GO:0016998; F:GO:0004568; F:GO:0008061	P:carbohydrate metabolic process; P:chitin catabolic process; P:cell wall macromolecule catabolic process; F:chitinase activity; F:chitin binding			52.0858	1.34265	0.00274075	0.0231096	30.262	48.378	43.808	16.39	11.901	8.167
TRINITY_DN214326_c1_g2							55.7055	1.02165	0.00274195	0.0231096	23.139	9.554	20.606	11.084	9.731	9.385
TRINITY_DN204950_c0_g3	Elaeis guineensis	XP_010927753.1 transcription factor TCP20-like					10.9016	2.40374	0.00274671	0.0231381	2.612	2.594	3.018	0.504	0.743	0.369
TRINITY_DN205215_c3_g4							15.2597	3.62349	0.00278009	0.0233259	17.306	1.484	13.814	0	3.574	0.446
TRINITY_DN206126_c1_g1	Elaeis guineensis	XP_019708318.1 receptor kinase-like protein Xa21	P:GO:0046777; F:GO:0004674; F:GO:0005524; C:GO:0005886	P:protein autophosphorylation; F:protein serine/threonine kinase activity; F:ATP binding; C:plasma membrane	EC:2.7.11	Transferring phosphorus-containing groups	198.679	1.03648	0.00279034	0.0233886	44.86	28.064	22.483	17.717	17.893	14.756
TRINITY_DN163437_c0_g1	Picea engelmannii x Picea glauca	AEF59004.1class VII chitinase	P:GO:0005975; P:GO:0006032; P:GO:0016998; F:GO:0004568	P:carbohydrate metabolic process; P:chitin catabolic process; P:cell wall macromolecule catabolic process; F:chitinase activity	EC:3.2.1.14	Chitinase	23.0711	2.08316	0.00281518	0.0235733	5.79	7.163	3.046	1.206	0.484	1.536
TRINITY_DN208606_c0_g4	Nelumbo nucifera	XP_010244362.1 asparagine--tRNA ligase, cytoplasmic 1-like	P:GO:0006421; F:GO:0003676; F:GO:0004816; F:GO:0005524; C:GO:0005739; C:GO:0009507	P:asparaginyl-tRNA aminoacylation; F:nucleic acid binding; F:asparagine-tRNA ligase activity; F:ATP binding; C:mitochondrion; C:chloroplast	EC:6.1.1.22	Asparagine--tRNA ligase	23.3658	1.69504	0.0028197	0.0235994	2.293	1.153	3.458	0.778	1.097	0.764
TRINITY_DN209675_c1_g1							117.797	1.20921	0.00291228	0.0242416	25.986	6.149	19.935	5.964	13.741	10.483
TRINITY_DN213180_c3_g3	Beta vulgaris subsp. vulgaris	RHN49886.1 putative ribonuclease H	P:GO:0090502; F:GO:0003676; F:GO:0004523; C:GO:0005634	P:RNA phosphodiester bond hydrolysis, endonucleolytic; F:nucleic acid binding; F:RNA-DNA hybrid ribonuclease activity; C:nucleus			96.2194	1.37326	0.00292733	0.0243429	3.252	1.441	6.677	1.359	1.911	1.553
TRINITY_DN212507_c0_g1	Vibrio vulnificus	KFK56155.1hypothetical protein JS83_25255, partial					63.8774	1.09299	0.00294103	0.0244326	3.124	1.943	3.41	1.283	1.144	1.699
TRINITY_DN183695_c0_g1	Aureobasidium pullulans EXF-150	XP_013429617.1ATP-binding cassette sub-family F member 2	P:GO:0000056; F:GO:0005524; F:GO:0016887; C:GO:0005634; C:GO:0016021	P:ribosomal small subunit export from nucleus; F:ATP binding; F:ATPase activity; C:nucleus; C:integral component of membrane	EC:3.6.1.3; EC:3.6.1.15	Adenosinetriphosphatase; Nucleoside-triphosphate phosphatase	4.65994	5.07362	0.00305832	0.0251096	0.81	0.085	1.197	0.088	0	0
TRINITY_DN208637_c1_g3	Picea sitchensis	BBC62113.1glucosyltransferase 14	F:GO:0035251	F:UDP-glucosyltransferase activity			8.28798	2.79686	0.00312007	0.0254922	6.579	6.309	4.637	0.921	0.896	0.583
TRINITY_DN212610_c0_g1	Cinnamomum micranthum f. kanehirae	RWR89608.1serine/threonine-protein kinase-like protein ACR4	P:GO:0006468; C:GO:0005886	P:protein phosphorylation; C:plasma membrane			64.9257	1.0572	0.00328377	0.0265845	4.852	2.936	5.786	2.182	2.418	3.569
TRINITY_DN212232_c8_g1							16.4936	2.2192	0.00330914	0.0267256	10.183	7.152	5.096	1.853	0.908	2.222
TRINITY_DN212310_c0_g1	Pinus radiata	AAQ63936.1cellulose synthase	P:GO:0009987; F:GO:0016757; C:GO:0016020	P:cellular process; F:transferase activity, transferring glycosyl groups; C:membrane			71.5858	1.25539	0.00332533	0.0268177	8.029	1.964	7.616	4.703	2.89	5.482
TRINITY_DN212328_c0_g3	Beta vulgaris subsp. vulgaris	OIT00302.1persulfide dioxygenase ethe1 -like, mitochondrial	P:GO:0055114; F:GO:0051213	P:oxidation-reduction process; F:dioxygenase activity			16.2822	1.91698	0.00338233	0.0271992	2.026	0.459	1.686	0.68	0.484	0.352
TRINITY_DN205833_c0_g1	Picea abies	XP_009386858.1 laccase-3-like	P:GO:0046274; P:GO:0055114; F:GO:0005507; F:GO:0052716; C:GO:0016021; C:GO:0048046	P:lignin catabolic process; P:oxidation-reduction process; F:copper ion binding; F:hydroquinone:oxygen oxidoreductase activity; C:integral component of membrane; C:apoplast	EC:1.10.3; EC:1.10.3.2	Acting on diphenols and related substances as donors; Laccase	4.47816	5.02213	0.00340551	0.0273141	0.864	0.213	0.853	0	0.071	0
TRINITY_DN200535_c0_g1							21.372	2.0809	0.00344114	0.0275144	1.44	1.761	2.979	0.647	1.321	0.738
TRINITY_DN183417_c0_g1	Brassica rapa	PKA54952.1Putative ribonuclease H protein	P:GO:0006278; P:GO:0090502; F:GO:0003676; F:GO:0003964; F:GO:0004523; F:GO:0008270; F:GO:0016787; C:GO:0016020; C:GO:0016021	P:RNA-dependent DNA biosynthetic process; P:RNA phosphodiester bond hydrolysis, endonucleolytic; F:nucleic acid binding; F:RNA-directed DNA polymerase activity; F:RNA-DNA hybrid ribonuclease activity; F:zinc ion binding; F:hydrolase activity; C:membrane; C:integral component of membrane			15.8027	1.87424	0.00346653	0.0277034	1.322	0.534	0.872	0.307	0.33	0.292
TRINITY_DN201398_c0_g1							6.00533	3.89845	0.00348963	0.027836	1.184	1.238	0.996	0	0.212	0.051
TRINITY_DN213437_c1_g1	Trifolium pratense	KYP61674.1Putative ribonuclease H protein At1g65750 family	P:GO:0090502; F:GO:0003676; F:GO:0004523	P:RNA phosphodiester bond hydrolysis, endonucleolytic; F:nucleic acid binding; F:RNA-DNA hybrid ribonuclease activity			32.2871	1.30088	0.00351063	0.0279637	1.034	0.801	1.332	0.965	0.46	0.944
TRINITY_DN203459_c0_g2	Picea glauca	ABQ51220.1R2R3-MYB transcription factor MYB4	P:GO:0050794; F:GO:0003677; C:GO:0005634	P:regulation of cellular process; F:DNA binding; C:nucleus			17.2658	2.34716	0.00365003	0.0288556	2.687	2.05	3.142	0.932	0.661	0.163
TRINITY_DN194632_c1_g1	Aureobasidium pullulans EXF-150	OQO20305.1ATP synthase subunit 9, mitochondrial	P:GO:0015986; F:GO:0008289; F:GO:0015078; C:GO:0016021; C:GO:0045263	P:ATP synthesis coupled proton transport; F:lipid binding; F:proton transmembrane transporter activity; C:integral component of membrane; C:proton-transporting ATP synthase complex, coupling factor F(o)			11.4411	2.35231	0.00367745	0.0290315	3.21	0.608	4.416	0.658	1.109	0.472
TRINITY_DN205570_c0_g1	Aureobasidium pullulans/Aureobasidium pullulans EXF-150	OBW67869.1 T-complex protein 1	P:GO:0008654; F:GO:0004609	P:phospholipid biosynthetic process; F:phosphatidylserine decarboxylase activity	EC:4.1.1.65	Phosphatidylserine decarboxylase	9.71216	2.49418	0.00370082	0.0292023	1.226	0.224	2.031	0.329	0.236	0.317
TRINITY_DN210753_c0_g1							16.4443	2.28683	0.00371042	0.0292369	5.033	1.612	2.146	0.789	0.896	0.352
TRINITY_DN214372_c1_g2	Tarenaya hassleriana	XP_010538533.1 potassium channel KAT1	P:GO:0034765; P:GO:0071805; F:GO:0005242; F:GO:0042802; C:GO:0005886; C:GO:0016021	P:regulation of ion transmembrane transport; P:potassium ion transmembrane transport; F:inward rectifier potassium channel activity; F:identical protein binding; C:plasma membrane; C:integral component of membrane			9.16703	2.58994	0.00378605	0.0296939	8.349	1.398	7.357	1.195	0.79	1.905
TRINITY_DN189137_c0_g1	Picea sitchensis	ABR16032.1unknown	C:GO:0016020	C:membrane			45.7772	2.95798	0.00396061	0.0307876	1.397	1.388	28.567	2.248	1.592	1.999
TRINITY_DN215199_c5_g7							22.9022	1.96459	0.00400253	0.0310159	3.967	0.694	5.892	1.82	1.663	0.506
TRINITY_DN203802_c0_g1	Dendrobium catenatum	XP_020672596.1uncharacterized protein LOC110092407	F:GO:0003676; F:GO:0008270	F:nucleic acid binding; F:zinc ion binding			6.91678	3.62463	0.00409263	0.0316413	0.64	0.534	1.159	0.11	0.106	0
TRINITY_DN213894_c2_g1	Picea sitchensis	ADE77070.1unknown	P:GO:0006355; F:GO:0003690	P:regulation of transcription, DNA-templated; F:double-stranded DNA binding			32.6681	2.02492	0.00412322	0.0318047	10.13	2.466	10.595	1.381	5.343	3.972
TRINITY_DN213467_c0_g3	Pinus monticola	AAS83985.1class IV chitinase Aa	P:GO:0005975; P:GO:0006032; P:GO:0016998; F:GO:0004568; F:GO:0008061	P:carbohydrate metabolic process; P:chitin catabolic process; P:cell wall macromolecule catabolic process; F:chitinase activity; F:chitin binding	EC:3.2.1.14	Chitinase	277.29	2.24534	0.00429554	0.0329077	92.748	75.429	166.006	37.67	34.359	9.265
TRINITY_DN207201_c5_g1	Picea sitchensis	ADE77156.1unknown					33.4083	1.59819	0.00430254	0.0329314	6.739	8.102	17.54	3.201	4.046	4.135
TRINITY_DN193316_c0_g1	Picea sitchensis	ABK22681.1unknown					66.8837	1.23297	0.00435166	0.0331715	10.354	7.483	5.901	3.739	3.94	2.634
TRINITY_DN211528_c6_g7							16.7249	1.81152	0.00437402	0.0332817	8.648	3.875	10.796	3.563	2.076	2.265
TRINITY_DN207068_c0_g7	Picea sitchensis	XP_009598627.1 laccase-12-like	P:GO:0046274; P:GO:0055114; F:GO:0005507; F:GO:0052716; C:GO:0016021; C:GO:0048046	P:lignin catabolic process; P:oxidation-reduction process; F:copper ion binding; F:hydroquinone:oxygen oxidoreductase activity; C:integral component of membrane; C:apoplast	EC:1.10.3; EC:1.10.3.2	Acting on diphenols and related substances as donors; Laccase	56.14	1.39382	0.00438235	0.033315	2.239	4.131	4.665	1.447	1.958	0.995
TRINITY_DN208103_c8_g1	Handroanthus impetiginosus	PIN15464.1DNA-directed DNA polymerase	P:GO:0006259; F:GO:0016779	P:DNA metabolic process; F:nucleotidyltransferase activity			22.3379	1.77589	0.00441995	0.0335251	3.071	0.811	1.648	0.46	0.767	0.695
TRINITY_DN211089_c2_g3							11.9813	2.0836	0.0045325	0.0341939	5.993	4.249	6.763	1.601	1.05	1.793
TRINITY_DN213682_c1_g3							14.9357	2.11738	0.00455819	0.0343569	11.985	6.533	10.26	1.096	3.609	2.805
TRINITY_DN209136_c0_g1	Physcomitrella patens	XP_024378532.1uncharacterized aarF domain-containing protein kinase 2-like isoform X2	C:GO:0016020	C:membrane			56.4968	1.31963	0.00460747	0.0346043	3.039	2.711	6.342	2.96	1.545	1.407
TRINITY_DN212129_c0_g1							52.9347	1.19152	0.00462627	0.0346991	2.698	1.633	3.707	1.535	1.734	1.047
TRINITY_DN195381_c0_g1							23.1163	2.58171	0.00465413	0.0347995	47.483	1.975	24.792	4.846	11.17	1.33
TRINITY_DN211524_c0_g2	Musa acuminata subsp. malaccensis	XP_009414887.1PREDICTED: uncharacterized protein LOC103995882	C:GO:0016020; C:GO:0016021	C:membrane; C:integral component of membrane			8.42926	3.30391	0.00475056	0.0354104	0.97	0.213	1.868	0.197	0	0.232
TRINITY_DN215366_c0_g1							9.91658	2.39876	0.00491344	0.0363508	2.026	0.929	0.996	0.285	0.318	0.42
TRINITY_DN193027_c0_g1							41.322	1.1531	0.00495613	0.0366023	12.764	13.45	19.763	6.589	7.419	7.472
TRINITY_DN213479_c2_g1	Massilia eurypsychrophila	WP_099792737.1ribonuclease HI family protein					35.1289	1.26732	0.00497251	0.0367072	2.868	2.135	4.273	1.349	1.486	1.716
TRINITY_DN212090_c0_g3	Actinidia chinensis var. chinensis	PSR96840.1Plasma membrane ATPase	P:GO:0051453; P:GO:0120029; F:GO:0005524; F:GO:0008553; F:GO:0016887; C:GO:0005886; C:GO:0016021	P:regulation of intracellular pH; P:proton export across plasma membrane; F:ATP binding; F:proton-exporting ATPase activity, phosphorylative mechanism; F:ATPase activity; C:plasma membrane; C:integral component of membrane	EC:7.1.3.1; EC:3.6.1.3; EC:7.1.2.1; EC:3.6.1.15	H(+)-exporting diphosphatase; Adenosinetriphosphatase; P-type H(+)-exporting transporter; Nucleoside-triphosphate phosphatase	92.7574	3.39764	0.00498618	0.0367919	14.971	0.971	11.812	3.015	0.495	0.317
TRINITY_DN192536_c0_g1	Picea sitchensis	AAT84462.1putative xyloglucan endotransglucosylase/hydrolase	P:GO:0010411; P:GO:0042546; P:GO:0071555; F:GO:0004553; F:GO:0016762; C:GO:0005618; C:GO:0016021; C:GO:0048046	P:xyloglucan metabolic process; P:cell wall biogenesis; P:cell wall organization; F:hydrolase activity, hydrolyzing O-glycosyl compounds; F:xyloglucan:xyloglucosyl transferase activity; C:cell wall; C:integral component of membrane; C:apoplast	EC:2.4.1.207	Xyloglucan:xyloglucosyl transferase	29.7233	2.63894	0.00513286	0.0375614	1.738	2.38	12.779	1.743	0.566	1.218
TRINITY_DN214373_c2_g1	Picea sitchensis	AIL50244.1putative auxin-repressed protein					41.1083	3.54298	0.00522198	0.0380338	0.608	2.904	22.503	1.447	1.522	0.24
TRINITY_DN182844_c0_g1							6.63227	3.58766	0.00522228	0.0380338	1.354	0.448	1.609	0	0.283	0.094
TRINITY_DN215115_c3_g2	Cucurbita maxima	XP_022991280.1stachyose synthase-like					74.1855	1.059	0.00525891	0.0382345	9.448	7.931	13.871	5.295	4.635	5.911
TRINITY_DN193185_c0_g1	Aureobasidium pullulans	KEQ82274.1RNA-binding domain-containing protein	F:GO:0003723	F:RNA binding			6.93356	2.98225	0.00527178	0.0382949	2.783	0.737	2.002	0.318	0.46	0.154
TRINITY_DN211561_c1_g8	Picea sitchensis	XP_009613051.1 lipase-like PAD4	P:GO:0006950; P:GO:0048583; P:GO:0050794; P:GO:0051707; C:GO:0016020	P:response to stress; P:regulation of response to stimulus; P:regulation of cellular process; P:response to other organism; C:membrane			31.9788	2.67521	0.00530048	0.0384702	1.791	1.633	20.146	1.436	1.557	2.128
TRINITY_DN205924_c3_g7	Cynara cardunculus var. scolymus	PNY01687.1putative retroelement pol polyprotein	P:GO:0006508; P:GO:0015074; F:GO:0003676; F:GO:0004190; C:GO:0005739	P:proteolysis; P:DNA integration; F:nucleic acid binding; F:aspartic-type endopeptidase activity; C:mitochondrion			18.387	1.66835	0.00541878	0.0391936	1.098	1.046	1.638	0.406	0.295	0.703
TRINITY_DN181567_c0_g3							7.46192	2.82276	0.00552942	0.0397547	1.12	0.181	2.079	0.307	0.189	0.189
TRINITY_DN206689_c0_g1	Picea sitchensis	ADE76058.1unknown					135.991	1.0744	0.00555132	0.0398951	26.85	12.319	17.742	12.542	6.004	12.285
TRINITY_DN210468_c0_g3	Aureobasidium pullulans/Aureobasidium pullulans EXF-150	KEQ89394.1aldehyde dehydrogenase, allergen Cla h 10	P:GO:0006068; P:GO:0055114; F:GO:0004029; F:GO:0043878; C:GO:0005737	P:ethanol catabolic process; P:oxidation-reduction process; F:aldehyde dehydrogenase (NAD+) activity; F:glyceraldehyde-3-phosphate dehydrogenase (NAD+) (non-phosphorylating) activity; C:cytoplasm	EC:1.2.1.5; EC:1.2.1.3	Aldehyde dehydrogenase (NAD(P)(+)); Aldehyde dehydrogenase (NAD(+))	13.1081	2.88038	0.00555962	0.0399376	2.559	0	2.644	0.077	0.649	0.146
TRINITY_DN206631_c0_g1							21.2025	3.00494	0.00556264	0.0399423	2.666	1.164	4.684	0.153	1.38	0.086
TRINITY_DN208636_c0_g2	Picea abies	AAL83725.1homeodomain protein HB2	P:GO:0006355; P:GO:0006357; F:GO:0000981; F:GO:0003677; F:GO:0008289; C:GO:0005634	P:regulation of transcription, DNA-templated; P:regulation of transcription by RNA polymerase II; F:DNA-binding transcription factor activity, RNA polymerase II-specific; F:DNA binding; F:lipid binding; C:nucleus			95.9356	1.17433	0.00565006	0.0404553	5.278	2.039	2.692	2.401	1.651	1.441
TRINITY_DN196441_c0_g2							11.1475	2.30192	0.00570195	0.0407847	0.981	0.651	2.108	0.285	0.342	0.335
TRINITY_DN211558_c0_g1	Cucumis melo	XP_016902461.1 LINE-1 retrotransposable element ORF2 protein	P:GO:0006278; F:GO:0003964; F:GO:0016740; F:GO:0016779; C:GO:0005768; C:GO:0005794; C:GO:0005802; C:GO:0016020; C:GO:0016021	P:RNA-dependent DNA biosynthetic process; F:RNA-directed DNA polymerase activity; F:transferase activity; F:nucleotidyltransferase activity; C:endosome; C:Golgi apparatus; C:trans-Golgi network; C:membrane; C:integral component of membrane			12.6464	2.27914	0.0057154	0.0408475	1.216	0.961	1.456	0.384	0.366	0.103
TRINITY_DN184389_c0_g1							8.18158	3.27207	0.00573281	0.0409517	2.293	0.576	1.188	0.285	0	0.275
TRINITY_DN210256_c0_g1	Populus trichocarpa	OMO87284.1reverse transcriptase	P:GO:0006278; F:GO:0003676; F:GO:0003964; F:GO:0008270; C:GO:0016020; C:GO:0016021	P:RNA-dependent DNA biosynthetic process; F:nucleic acid binding; F:RNA-directed DNA polymerase activity; F:zinc ion binding; C:membrane; C:integral component of membrane			14.4474	2.01343	0.00575061	0.0410294	0.704	0.246	1.054	0.329	0.153	0.189
TRINITY_DN206552_c0_g1	Aureobasidium pullulans EXF-150	KEQ82198.1hypothetical protein M438DRAFT_357250	C:GO:0016021	C:integral component of membrane			14.7285	2.5476	0.00576751	0.0411152	1.717	0.374	1.533	1.063	0.142	0.146
TRINITY_DN192060_c0_g1							15.0976	2.09287	0.00583154	0.0414488	4.34	1.9	6.667	2.05	1.085	0.712
TRINITY_DN202549_c3_g1							21.2983	1.70889	0.00611075	0.0430876	1.578	1.067	1.514	0.724	0.484	0.275
TRINITY_DN198382_c0_g4	Phoenix dactylifera	PSR93461.1Serine/arginine repetitive matrix protein					66.2169	1.00888	0.00630385	0.0442084	2.612	2.551	4.071	1.513	1.816	1.776
TRINITY_DN209740_c0_g4	Musa acuminata subsp. malaccensis	XP_009413213.1 cell division cycle 20.2, cofactor of APC complex-like	P:GO:0051301; P:GO:1904668; P:GO:1905786; F:GO:0010997; F:GO:1990757; C:GO:0005680	P:cell division; P:positive regulation of ubiquitin protein ligase activity; P:positive regulation of anaphase-promoting complex-dependent catabolic process; F:anaphase-promoting complex binding; F:ubiquitin ligase activator activity; C:anaphase-promoting complex			28.7138	1.30613	0.00631088	0.0442208	22.649	12.788	27.216	7.247	11.217	9.952
TRINITY_DN192678_c0_g1							8.37275	2.40486	0.00634577	0.0443545	1.45	0.598	1.638	0.274	0.354	0.266
TRINITY_DN214012_c1_g2	Cupressus sempervirens	AAF72627.1Cup s 1 pollen allergen precursor	P:GO:0045490; F:GO:0016829; F:GO:0030570; F:GO:0046872; C:GO:0016020; C:GO:0016021	P:pectin catabolic process; F:lyase activity; F:pectate lyase activity; F:metal ion binding; C:membrane; C:integral component of membrane			53.9723	1.21308	0.00642238	0.0447228	8.381	4.515	4.732	2.248	3.102	3.251
TRINITY_DN213837_c0_g1	Jatropha curcas	XP_012085538.1protein JINGUBANG	P:GO:0016310; F:GO:0016301; C:GO:0005886	P:phosphorylation; F:kinase activity; C:plasma membrane			33.8655	1.43511	0.00643685	0.0448051	5.705	10.056	7.942	2.631	3.362	1.604
TRINITY_DN195854_c0_g1	Picea sitchensis	AAM28917.1putative TIR/NBS/LRR disease resistance protein	P:GO:0007165; F:GO:0043531	P:signal transduction; F:ADP binding			8.55586	2.45543	0.00644418	0.044819	5.225	2.487	4.359	1.063	0.519	1.021
TRINITY_DN209306_c1_g1							39.2436	1.21127	0.0065368	0.0453507	17.114	10.173	27.637	10.843	9.342	7.472
TRINITY_DN189235_c0_g1	Nicotiana sylvestris/Nicotiana tabacum	XP_009780492.1 peroxidase 10-like	P:GO:0008152; P:GO:0009987; P:GO:0050896; F:GO:0005488; F:GO:0016491	P:metabolic process; P:cellular process; P:response to stimulus; F:binding; F:oxidoreductase activity			94.1296	1.04538	0.00658927	0.0456771	8.243	11.016	16.199	6.337	5.591	6.125
TRINITY_DN212546_c1_g1	Pinus tabuliformis	AAQ57135.1putative NBS-LRR protein G8106	P:GO:0007165; F:GO:0043531	P:signal transduction; F:ADP binding			7.38465	4.18523	0.0067415	0.0465216	4.383	0	2.069	0.537	0	0
TRINITY_DN211830_c0_g1	Amborella trichopoda	XP_006838303.1polygalacturonase isoform X1	P:GO:0003006; P:GO:0007275; P:GO:0008152; P:GO:0009987; P:GO:0048609	P:developmental process involved in reproduction; P:multicellular organism development; P:metabolic process; P:cellular process; P:multicellular organismal reproductive process			435.633	2.2837	0.00675294	0.0465433	66.208	28.587	34.506	10.667	16.702	3.706
TRINITY_DN212954_c0_g2	Pinus monticola	ADB97931.1thaumatin-like protein S1	P:GO:0006952; C:GO:0005576; C:GO:0016021	P:defense response; C:extracellular region; C:integral component of membrane			306.874	2.02289	0.00678596	0.0467135	88.43	11.273	64.136	43.667	14.508	11.762
TRINITY_DN201575_c5_g1							39.9694	1.24105	0.00683057	0.0469246	6.27	5.828	5.709	3.892	1.675	3.474
TRINITY_DN29655_c0_g1							316.872	1.06564	0.00689613	0.0473171	77.884	74.35	53.445	27.716	47.228	20.212
TRINITY_DN210644_c0_g3							31.7448	1.23301	0.00697125	0.0476997	4.766	3.491	5.068	2.105	2.017	2.179
TRINITY_DN213303_c1_g1	Picea rubens	AUR53394.1beta-glucosidase 1	P:GO:0005975; P:GO:0009651; P:GO:0019762; F:GO:0008422; F:GO:0102483	P:carbohydrate metabolic process; P:response to salt stress; P:glucosinolate catabolic process; F:beta-glucosidase activity; F:scopolin beta-glucosidase activity	EC:3.2.1.21	Beta-glucosidase	16.7012	2.12181	0.00721454	0.0490984	13.393	8.881	18.278	3.585	6.133	1.261
TRINITY_DN213806_c1_g1	Arabidopsis thaliana	XP_009387132.1 probable leucine-rich repeat receptor-like protein kinase At5g49770	P:GO:0006468; P:GO:0016310; F:GO:0000166; F:GO:0003824; F:GO:0004672; F:GO:0004674; F:GO:0005524; F:GO:0016301; F:GO:0016740; C:GO:0016020; C:GO:0016021	P:protein phosphorylation; P:phosphorylation; F:nucleotide binding; F:catalytic activity; F:protein kinase activity; F:protein serine/threonine kinase activity; F:ATP binding; F:kinase activity; F:transferase activity; C:membrane; C:integral component of membrane			46.1988	1.04474	0.00725442	0.0492932	2.794	3	5.47	1.787	2.159	1.681
TRINITY_DN188497_c0_g1	Marchantia polymorpha subsp. ruderalis	XP_002506035.1predicted protein					72.7705	1.00536	0.0073093	0.049566	9.096	5.38	13.239	5.284	6.971	4.641
TRINITY_DN206966_c0_g1	Pinus radiata	ALH22543.1expansin B1	P:GO:0006949; P:GO:0019953; F:GO:0003676; C:GO:0005576; C:GO:0009506; C:GO:0016021	P:syncytium formation; P:sexual reproduction; F:nucleic acid binding; C:extracellular region; C:plasmodesma; C:integral component of membrane			1226.87	-2.75483	2.83018e-96	4.76347e-92	40.403	61.946	37.667	243.773	273.223	286.014
TRINITY_DN213978_c4_g1	Pinus radiata	ALH22543.1expansin B1	P:GO:0006949; P:GO:0019953; F:GO:0003676; C:GO:0005576; C:GO:0009506; C:GO:0016021	P:syncytium formation; P:sexual reproduction; F:nucleic acid binding; C:extracellular region; C:plasmodesma; C:integral component of membrane			1461.74	-2.20207	5.93356e-72	4.99338e-68	96.757	122.024	96.965	410.362	484.368	438.454
TRINITY_DN213873_c1_g1	Picea sitchensis	OTG06763.1 putative alpha-galactosidase	P:GO:0005975; P:GO:0009620; P:GO:0009911; P:GO:0009965; F:GO:0052692; C:GO:0009505; C:GO:0048046	P:carbohydrate metabolic process; P:response to fungus; P:positive regulation of flower development; P:leaf morphogenesis; F:raffinose alpha-galactosidase activity; C:plant-type cell wall; C:apoplast	EC:3.2.1.22	Alpha-galactosidase	1251.7	-1.87525	5.59186e-70	2.35291e-66	69.438	176.669	66.617	240.308	259.894	251.141
TRINITY_DN213873_c1_g4	Brassica oleracea	XP_009125728.1 alpha-galactosidase 1	P:GO:0005975; F:GO:0052692; C:GO:0009505; C:GO:0016021	P:carbohydrate metabolic process; F:raffinose alpha-galactosidase activity; C:plant-type cell wall; C:integral component of membrane	EC:3.2.1.22	Alpha-galactosidase	871.804	-1.99472	8.23831e-60	2.77318e-56	49.978	130.244	56.702	207.407	220.699	219.347
TRINITY_DN207248_c2_g1	Picea sitchensis	XP_017609220.1 alpha-galactosidase-like	P:GO:0005975; F:GO:0052692; C:GO:0009505	P:carbohydrate metabolic process; F:raffinose alpha-galactosidase activity; C:plant-type cell wall	EC:3.2.1.22	Alpha-galactosidase	3125.44	-1.33137	2.48884e-59	6.98161e-56	337.83	514.507	342.358	834.308	870.234	905.226
TRINITY_DN215451_c4_g5	Picea glauca	KUM48943.1hypothetical protein ABT39_MTgene4279 (mitochondrion)	C:GO:0005739	C:mitochondrion			399.958	-5.09678	1.9571e-51	4.7057e-48	0.256	35.803	0.383	12.235	8.469	12.148
TRINITY_DN204554_c0_g5	Beta vulgaris subsp. vulgaris	XP_010672957.1 gibberellin-regulated protein 13 isoform X1	P:GO:0006506; F:GO:0017176; C:GO:0016021	P:GPI anchor biosynthetic process; F:phosphatidylinositol N-acetylglucosaminyltransferase activity; C:integral component of membrane	EC:2.4.1.198	Phosphatidylinositol N-acetylglucosaminyltransferase	682.298	-5.21071	5.84419e-45	9.83635e-42	3.391	26.794	9.244	172.302	291.894	216.001
TRINITY_DN213061_c0_g1	Picea sitchensis	AAC32107.1probable aquaporin	P:GO:0006833; P:GO:0055085; F:GO:0015250; C:GO:0005773; C:GO:0005886; C:GO:0009506; C:GO:0016021	P:water transport; P:transmembrane transport; F:water channel activity; C:vacuole; C:plasma membrane; C:plasmodesma; C:integral component of membrane			552.762	-2.94648	6.28059e-42	8.80905e-39	10.194	27.936	11.544	70.977	97.947	83.182
TRINITY_DN211247_c0_g3	Pinus pinaster	APA32590.1arogenate dehydratase	P:GO:0009094; F:GO:0004664; F:GO:0047769; C:GO:0009570	P:L-phenylalanine biosynthetic process; F:prephenate dehydratase activity; F:arogenate dehydratase activity; C:chloroplast stroma	EC:4.2.1.51; EC:4.2.1.91	Prephenate dehydratase; Arogenate dehydratase	1466.27	-1.42282	1.34651e-41	1.74332e-38	58.893	71.372	66.56	176.15	179.038	200.851
TRINITY_DN215132_c3_g2	Trifolium subterraneum	GAU40233.1hypothetical protein TSUD_219430	P:GO:0015074; F:GO:0003676	P:DNA integration; F:nucleic acid binding			211.041	-4.48307	3.89814e-38	4.37397e-35	0.363	20.88	0.565	9.209	9.33	6.091
TRINITY_DN199900_c0_g3	Picea sitchensis	XP_022035748.1arabinogalactan peptide 20-like	C:GO:0016021	C:integral component of membrane			1815.1	-1.17687	3.63157e-37	3.59547e-34	124.93	135.688	126.021	276.498	296.778	291.856
TRINITY_DN210707_c0_g2	Pinus taeda	AAF75825.1proline-rich protein	C:GO:0016021	C:integral component of membrane			14006	-1.51024	2.80914e-36	2.6267e-33	783.923	1188.28	636.033	1969.95	2132.51	2081.27
TRINITY_DN211036_c0_g1							1178.78	-3.09667	1.17794e-35	1.04347e-32	44.913	70.433	61.291	348.857	263.445	425.774
TRINITY_DN210809_c0_g1	Amborella trichopoda	XP_006826864.2WUSCHEL-related homeobox 1 isoform X1	F:GO:0003677; C:GO:0005634	F:DNA binding; C:nucleus			181.704	-3.59609	3.94115e-33	3.18486e-30	1.312	2.605	1.351	17.355	15.923	17.458
TRINITY_DN211922_c0_g6	Picea sitchensis	RWR96981.1putative pectate lyase 18	P:GO:0045490; F:GO:0030570; F:GO:0046872; C:GO:0016020	P:pectin catabolic process; F:pectate lyase activity; F:metal ion binding; C:membrane	EC:4.2.2.2	Pectate lyase	642.866	-1.82957	3.97374e-33	3.18486e-30	40.541	46.105	35.282	97.991	101.521	107.074
TRINITY_DN209607_c0_g4	Lupinus angustifolius	XP_019455007.1 fatty acyl-CoA reductase 2-like	P:GO:0009987; P:GO:0044238; P:GO:0071704; F:GO:0016620; C:GO:0043229	P:cellular process; P:primary metabolic process; P:organic substance metabolic process; F:oxidoreductase activity, acting on the aldehyde or oxo group of donors, NAD or NADP as acceptor; C:intracellular organelle			841.633	-2.58799	5.47707e-33	4.1902e-30	19.482	43.34	22.119	124.348	111.087	169.297
TRINITY_DN205578_c0_g1	Pinus pinaster	APA32582.1arogenate dehydratase	P:GO:0009094; F:GO:0004664; F:GO:0047769; C:GO:0009570	P:L-phenylalanine biosynthetic process; F:prephenate dehydratase activity; F:arogenate dehydratase activity; C:chloroplast stroma	EC:4.2.1.51; EC:4.2.1.91	Prephenate dehydratase; Arogenate dehydratase	1590.96	-1.6723	2.04046e-32	1.49317e-29	39.72	35.814	36.135	136.057	109.117	128.084
TRINITY_DN260404_c0_g1	Picea sitchensis	XP_015935890.136.4 kDa proline-rich protein	C:GO:0016020; C:GO:0016021	C:membrane; C:integral component of membrane			698.314	-2.67769	4.5479e-31	3.06183e-28	17.445	76.88	23.106	112.825	117.362	164.073
TRINITY_DN148469_c0_g1	Picea sitchensis	XP_024976160.1probable pectate lyase 18	P:GO:0045490; F:GO:0030570; F:GO:0046872	P:pectin catabolic process; F:pectate lyase activity; F:metal ion binding	EC:4.2.2.2	Pectate lyase	352.487	-1.94333	4.8671e-31	3.1507e-28	31.616	48.869	39.593	131.638	135.396	135.179
TRINITY_DN212953_c0_g1	Acinetobacter baumannii	XP_020083130.1MLP-like protein 423	P:GO:0006952; P:GO:0009738; P:GO:0032515; F:GO:0004864; F:GO:0010427; F:GO:0038023	P:defense response; P:abscisic acid-activated signaling pathway; P:negative regulation of phosphoprotein phosphatase activity; F:protein phosphatase inhibitor activity; F:abscisic acid binding; F:signaling receptor activity			3920.96	-2.28458	5.72732e-30	3.38752e-27	300.029	674.501	221.635	1121.98	1039.81	1466.43
TRINITY_DN195090_c0_g1	Picea sitchensis	ADE76330.1unknown	P:GO:0007165; P:GO:0008283; F:GO:0008083; C:GO:0005576	P:signal transduction; P:cell population proliferation; F:growth factor activity; C:extracellular region			762.76	-2.86694	5.83674e-30	3.38752e-27	14.651	28.534	10.605	98.638	74.64	119.016
TRINITY_DN199055_c1_g1	Pinus taeda	Q6J163.1RecName: Full=Auxin-induced protein 5NG4	P:GO:0009826; P:GO:0009834; P:GO:0010315; P:GO:0055085; P:GO:0090355; P:GO:0090358; F:GO:0022857; C:GO:0005887; C:GO:0005938; C:GO:0009705	P:unidimensional cell growth; P:plant-type secondary cell wall biogenesis; P:auxin efflux; P:transmembrane transport; P:positive regulation of auxin metabolic process; P:positive regulation of tryptophan metabolic process; F:transmembrane transporter activity; C:integral component of plasma membrane; C:cell cortex; C:plant-type vacuole membrane			1725	-1.77968	6.70275e-30	3.72697e-27	43.804	34.437	39.698	129.161	142.886	174.144
TRINITY_DN211922_c0_g2	Picea sitchensis	XP_012071502.1pectate lyase	P:GO:0045490; F:GO:0030570; F:GO:0046872; C:GO:0016020	P:pectin catabolic process; F:pectate lyase activity; F:metal ion binding; C:membrane	EC:4.2.2.2	Pectate lyase	1824.11	-1.51775	2.53488e-28	1.25484e-25	111.633	183.191	112.829	293.525	355.341	314.874
TRINITY_DN204660_c0_g1	Cephalotus follicularis	GAV86140.1SET domain-containing protein/Sterile domain-containing protein/NAD_binding_4 domain-containing protein	P:GO:0006725; P:GO:0044238; P:GO:1901360; F:GO:0016620; C:GO:0043231	P:cellular aromatic compound metabolic process; P:primary metabolic process; P:organic cyclic compound metabolic process; F:oxidoreductase activity, acting on the aldehyde or oxo group of donors, NAD or NADP as acceptor; C:intracellular membrane-bounded organelle			556.411	-2.79174	1.49473e-27	7.18796e-25	21.038	39.817	17.703	134.237	108.739	178.966
TRINITY_DN205859_c0_g1	Pinus taeda	AZA14776.1Glucan endo-1,3-beta-glucosidase 7	P:GO:0005975; F:GO:0004553; C:GO:0016021; C:GO:0046658	P:carbohydrate metabolic process; F:hydrolase activity, hydrolyzing O-glycosyl compounds; C:integral component of membrane; C:anchored component of plasma membrane			15409.1	-1.19343	3.25235e-27	1.49687e-24	204.018	313.862	197.016	537.297	469.718	577.107
TRINITY_DN208638_c2_g10	Picea sitchensis	ABR27716.1dirigent-like protein	C:GO:0048046	C:apoplast			1989.16	-1.0489	3.29062e-27	1.49687e-24	146.693	158.223	154.3	305.157	304.527	340.542
TRINITY_DN213847_c3_g4	Pinus tabuliformis	ACB42238.1leucoanthocyanidin deoxygenase	P:GO:0055114; F:GO:0016491; F:GO:0046872	P:oxidation-reduction process; F:oxidoreductase activity; F:metal ion binding			531.877	-1.66927	1.63657e-26	6.88627e-24	67.157	96.405	63.264	202.977	189.406	225.352
TRINITY_DN146414_c0_g1							239.11	-2.66363	2.13963e-26	8.57432e-24	31.094	208.042	25.808	150.989	179.758	196.055
TRINITY_DN211146_c0_g1	Picea sitchensis	ASU43993.1UDP-glycosyltransferase UGT2	F:GO:0008194	F:UDP-glycosyltransferase activity			422.63	-2.54593	3.88232e-26	1.51961e-23	6.398	24.947	5.69	35.291	29.04	45.057
TRINITY_DN211040_c8_g3							1869.69	-1.788	4.7139e-26	1.80317e-23	98.986	153.974	130.581	345.985	428.034	424.787
TRINITY_DN200966_c0_g1	Picea sitchensis	A9P1V1.1RecName: Full=CASP-like protein 2A2; Short=PsCASPL2A2	F:GO:0051539; C:GO:0005886; C:GO:0016021	F:4 iron, 4 sulfur cluster binding; C:plasma membrane; C:integral component of membrane			364.69	-1.84637	6.8743e-26	2.57114e-23	12.529	17.453	14.178	44.687	47.487	52.426
TRINITY_DN204067_c0_g2	Pinus pinaster	CAP09644.1chalcone synthase	P:GO:0006633; P:GO:0009813; F:GO:0004315; F:GO:0016210	P:fatty acid biosynthetic process; P:flavonoid biosynthetic process; F:3-oxoacyl-[acyl-carrier-protein] synthase activity; F:naringenin-chalcone synthase activity	EC:2.3.1.41; EC:2.3.1.74; EC:2.3.1.85	Beta-ketoacyl-[acyl-carrier-protein] synthase I; Chalcone synthase; Fatty-acid synthase system	624.239	-1.55354	1.06066e-25	3.88085e-23	95.457	96.778	88.871	261.731	249.727	289.042
TRINITY_DN195336_c0_g1	Picea sitchensis	ABK21912.1unknown					1259.12	-1.25596	1.55359e-25	5.4476e-23	175.153	304.148	213.512	433.254	443.462	491.695
TRINITY_DN182112_c0_g1	Picea sitchensis	XP_002989708.2bidirectional sugar transporter SWEET4	P:GO:0008643; F:GO:0051119; C:GO:0016021	P:carbohydrate transport; F:sugar transmembrane transporter activity; C:integral component of membrane			170.71	-6.44983	2.08068e-25	7.14693e-23	0.267	3.758	0.393	27.255	27.801	30.49
TRINITY_DN203996_c0_g3	Pinus sylvestris	AIJ02001.1mother of FT and TFL1-like 1					525.497	-2.5557	3.51029e-25	1.15847e-22	12.295	51.431	15.078	97.29	63.222	84.683
TRINITY_DN197399_c0_g1	Populus euphratica	XP_011044595.1 protein FAF-like, chloroplastic	P:GO:0009788; P:GO:0010922; P:GO:0042326; F:GO:0004386; F:GO:0019902; F:GO:0047485; C:GO:0005634; C:GO:0005737; C:GO:0005783	P:negative regulation of abscisic acid-activated signaling pathway; P:positive regulation of phosphatase activity; P:negative regulation of phosphorylation; F:helicase activity; F:phosphatase binding; F:protein N-terminus binding; C:nucleus; C:cytoplasm; C:endoplasmic reticulum			645.224	-1.63189	3.7572e-25	1.2161e-22	10.493	10.611	11.697	37.638	31.469	37.121
TRINITY_DN208926_c0_g1	Actinidia chinensis var. chinensis	RWR96477.1endoglucanase 6	P:GO:0030245; F:GO:0008810; F:GO:0030246	P:cellulose catabolic process; F:cellulase activity; F:carbohydrate binding	EC:3.2.1.4	Cellulase	657.025	-1.84716	2.72321e-24	8.648e-22	8.989	10.194	6.543	27.836	26.645	32.514
TRINITY_DN214874_c4_g5	Picea sitchensis	XP_010938322.1 putative UDP-rhamnose:rhamnosyltransferase 1	F:GO:0008194	F:UDP-glycosyltransferase activity			340.652	-1.94039	8.88215e-24	2.7181e-21	10.93	14.518	15.969	49.281	47.452	47.536
TRINITY_DN201042_c0_g1	Selaginella moellendorffii	XP_022136998.1protein SHOOT GRAVITROPISM 5-like	P:GO:0006355; P:GO:0009630; F:GO:0003700; C:GO:0005634	P:regulation of transcription, DNA-templated; P:gravitropism; F:DNA-binding transcription factor activity; C:nucleus			272.316	-1.78099	2.59734e-23	7.80638e-21	4.244	5.209	3.784	14.077	13.671	15.125
TRINITY_DN209211_c0_g1	Picea sitchensis	XP_011100361.1O-acyltransferase WSD1	P:GO:0045017; F:GO:0004144	P:glycerolipid biosynthetic process; F:diacylglycerol O-acyltransferase activity	EC:2.3.1.20	Diacylglycerol O-acyltransferase	379.852	-2.07526	2.7094e-23	8.00033e-21	8.595	18.852	7.051	32.32	32.885	39.678
TRINITY_DN206485_c3_g3							313.368	-4.40085	4.47808e-23	1.27747e-20	1.024	43.094	3.909	55.683	50.353	46.181
TRINITY_DN213847_c2_g1	Pinus tabuliformis	ACB42238.1leucoanthocyanidin deoxygenase	P:GO:0043473; P:GO:0055114; F:GO:0046872; F:GO:0051213	P:pigmentation; P:oxidation-reduction process; F:metal ion binding; F:dioxygenase activity			3311.18	-1.01861	2.07918e-22	5.73682e-20	855.388	752.855	835.041	1647.66	1469.84	1689.3
TRINITY_DN191177_c0_g2							906.555	-1.2322	2.28522e-22	6.20364e-20	148.111	154.871	191.661	379.182	383.401	398.235
TRINITY_DN204554_c0_g7	Pyrus x bretschneideri	XP_009337038.1 protein GAST1-like	P:GO:0006506; F:GO:0017176; C:GO:0016020; C:GO:0016021	P:GPI anchor biosynthetic process; F:phosphatidylinositol N-acetylglucosaminyltransferase activity; C:membrane; C:integral component of membrane			1196.54	-1.99146	2.61578e-22	6.98828e-20	51.194	74.671	41.902	158.411	229.392	187.107
TRINITY_DN207176_c0_g1	Papaver somniferum	XP_026447994.13-ketoacyl-CoA synthase 12-like	F:GO:0016740	F:transferase activity			287.072	-2.73382	5.1854e-22	1.3427e-19	5.396	12.255	4.57	36.19	25.371	40.99
TRINITY_DN214241_c2_g1							204.432	-2.88598	7.16406e-22	1.82694e-19	10.78	25.214	16.956	91.139	83.616	120.157
TRINITY_DN192084_c1_g2	Pinus radiata	AAD09207.1putative MADS-box family transcription factor	P:GO:0045944; F:GO:0000977; F:GO:0003700; F:GO:0046983; C:GO:0005634	P:positive regulation of transcription by RNA polymerase II; F:RNA polymerase II regulatory region sequence-specific DNA binding; F:DNA-binding transcription factor activity; F:protein dimerization activity; C:nucleus			3068.5	-1.71769	3.15932e-21	7.59635e-19	122.498	228.378	180.155	492.555	478.47	545.914
TRINITY_DN182528_c0_g2	Pinus taeda	AZA14771.1Fasciclin-like arabinogalactan protein 7	P:GO:0007155; P:GO:0009651; P:GO:0009733; P:GO:0009735; P:GO:0009737; P:GO:0009739; P:GO:0009834; P:GO:0090376; C:GO:0005886; C:GO:0031224	P:cell adhesion; P:response to salt stress; P:response to auxin; P:response to cytokinin; P:response to abscisic acid; P:response to gibberellin; P:plant-type secondary cell wall biogenesis; P:seed trichome differentiation; C:plasma membrane; C:intrinsic component of membrane			1401.88	-1.17985	6.17747e-21	1.46441e-18	51.898	77.937	58.168	126.639	117.704	139.151
TRINITY_DN198831_c1_g2	Picea sitchensis	BAX09109.1TRICHOME BIREFRINGENCE-like protein	C:GO:0110165	C:cellular anatomical entity			211.723	-2.54569	2.74431e-20	6.15859e-18	2.879	7.131	4.57	19.811	21.054	25.059
TRINITY_DN204554_c0_g4	Malus domestica	XP_008344997.1 protein GAST1-like					1350.23	-1.95673	8.72711e-20	1.85932e-17	130.57	238.241	148.083	451.442	721.096	563.629
TRINITY_DN215385_c4_g5							131.622	-2.79403	9.87659e-20	2.07791e-17	8.904	67.529	14.983	63.204	83.934	70.21
TRINITY_DN185302_c0_g1	Picea sitchensis	XP_024386172.13-dehydrosphinganine reductase TSC10A-like	P:GO:0008152; C:GO:0016020	P:metabolic process; C:membrane			718.284	-2.52273	2.39539e-19	4.82119e-17	7.848	13.578	13.287	54.236	55.744	78.051
TRINITY_DN197235_c1_g1	Pinus pinaster	AAP85249.1chalcone synthase	P:GO:0009813; F:GO:0016210	P:flavonoid biosynthetic process; F:naringenin-chalcone synthase activity	EC:2.3.1.74	Chalcone synthase	6472.07	-1.0093	3.0657e-19	6.07044e-17	1732.39	1578.5	1748.68	3499.01	3119.49	3510.67
TRINITY_DN205114_c0_g2	Pinus pinaster	AQX43151.1NPF family transporter	P:GO:0055085; F:GO:0022857; C:GO:0016021	P:transmembrane transport; F:transmembrane transporter activity; C:integral component of membrane			370.665	-1.83675	4.66657e-19	9.02794e-17	6.27	10.248	6.543	24.646	19.45	26.655
TRINITY_DN189246_c1_g1							146.466	-2.2843	6.33475e-19	1.21159e-16	5.3	14.272	4.158	24.503	22.423	24.982
TRINITY_DN101255_c0_g1							185.849	-2.98648	7.26985e-19	1.37482e-16	5.609	9.81	7.645	48.502	40.929	68.194
TRINITY_DN212543_c0_g2	Amborella trichopoda	XP_006826915.1endoglucanase 8 isoform X1	P:GO:0030245; P:GO:0042547; F:GO:0008810; C:GO:0009507	P:cellulose catabolic process; P:cell wall modification involved in multidimensional cell growth; F:cellulase activity; C:chloroplast	EC:3.2.1.4	Cellulase	832.996	-1.40325	1.29055e-18	2.38695e-16	24.067	29.516	18.058	52.372	48.407	59.675
TRINITY_DN203068_c0_g2	Zea mays	XP_008670933.1transcription factor BHLH094	P:GO:0006355; F:GO:0003700; F:GO:0046983; C:GO:0005634	P:regulation of transcription, DNA-templated; F:DNA-binding transcription factor activity; F:protein dimerization activity; C:nucleus			235.273	-2.30921	1.35977e-18	2.48765e-16	5.929	15.713	6.495	29.601	25.985	38.76
TRINITY_DN203858_c1_g1	Amborella trichopoda	XP_011624969.1alpha-ketoglutarate-dependent dioxygenase alkB isoform X1	F:GO:0016491; C:GO:0005719; C:GO:0005739	F:oxidoreductase activity; C:nuclear euchromatin; C:mitochondrion			416.027	-1.22128	3.79564e-18	6.79622e-16	16.432	24.477	18.853	43.854	41.035	44.868
TRINITY_DN213873_c1_g2	Picea sitchensis	XP_019055425.1 alpha-galactosidase 1	P:GO:0005975; F:GO:0052692; C:GO:0009505; C:GO:0016021	P:carbohydrate metabolic process; F:raffinose alpha-galactosidase activity; C:plant-type cell wall; C:integral component of membrane	EC:3.2.1.22	Alpha-galactosidase	326.47	-3.00625	7.20744e-18	1.27693e-15	6.931	6.149	7.108	56.867	32.767	69.181
TRINITY_DN196288_c0_g1	Picea sitchensis	ABK23009.1unknown					291.716	-2.63038	7.86904e-18	1.37962e-15	6.099	27.904	11.39	47.823	63.128	51.525
TRINITY_DN210109_c0_g1	Pinus radiata	RVX20554.1Endoglucanase 17	P:GO:0030245; F:GO:0008810	P:cellulose catabolic process; F:cellulase activity	EC:3.2.1.4	Cellulase	15167	-1.5924	7.96647e-18	1.38231e-15	570.618	625.6	396.474	1294.35	1633.73	1554.68
TRINITY_DN191298_c0_g2	Pinus radiata	AAQ63936.1cellulose synthase	P:GO:0071554; P:GO:0071840; F:GO:0016757; C:GO:0005737; C:GO:0012505; C:GO:0016020; C:GO:0043227; C:GO:0043229	P:cell wall organization or biogenesis; P:cellular component organization or biogenesis; F:transferase activity, transferring glycosyl groups; C:cytoplasm; C:endomembrane system; C:membrane; C:membrane-bounded organelle; C:intracellular organelle			3084.74	-1.05293	1.01957e-17	1.75107e-15	93.505	125.387	84.292	178.968	176.55	216.216
TRINITY_DN211500_c0_g1	Picea sitchensis	XP_021662491.1very-long-chain (3R)-3-hydroxyacyl-CoA dehydratase PASTICCINO 2	P:GO:0007275; P:GO:0030148; P:GO:0030154; P:GO:0030497; P:GO:0042761; P:GO:0048640; P:GO:0050732; P:GO:0051302; F:GO:0018812; F:GO:0102158; F:GO:0102343; F:GO:0102344; F:GO:0102345; C:GO:0005634; C:GO:0005783; C:GO:0005829; C:GO:0030176	P:multicellular organism development; P:sphingolipid biosynthetic process; P:cell differentiation; P:fatty acid elongation; P:very long-chain fatty acid biosynthetic process; P:negative regulation of developmental growth; P:negative regulation of peptidyl-tyrosine phosphorylation; P:regulation of cell division; F:3-hydroxyacyl-CoA dehydratase activity; F:very-long-chain 3-hydroxyacyl-CoA dehydrat…	EC:4.2.1.134	Very-long-chain (3R)-3-hydroxyacyl-CoA dehydratase	1890.84	-1.12822	1.11926e-17	1.90286e-15	69.47	93.063	69.175	151.241	148.336	184.602
TRINITY_DN203110_c0_g1	Picea sitchensis	XP_021821523.1probable xyloglucan endotransglucosylase/hydrolase protein 8	P:GO:0010411; P:GO:0042546; P:GO:0071555; F:GO:0004553; F:GO:0016762; C:GO:0005618; C:GO:0048046	P:xyloglucan metabolic process; P:cell wall biogenesis; P:cell wall organization; F:hydrolase activity, hydrolyzing O-glycosyl compounds; F:xyloglucan:xyloglucosyl transferase activity; C:cell wall; C:apoplast	EC:2.4.1.207	Xyloglucan:xyloglucosyl transferase	504.884	-1.38706	1.3505e-17	2.27303e-15	20.633	29.708	21.88	46.978	52.394	60.001
TRINITY_DN206044_c0_g1	Picea sitchensis	XP_021610902.1bZIP transcription factor 11-like	P:GO:0045893; F:GO:0000976; F:GO:0003700; C:GO:0005634	P:positive regulation of transcription, DNA-templated; F:transcription regulatory region sequence-specific DNA binding; F:DNA-binding transcription factor activity; C:nucleus			1305.11	-1.28203	1.66113e-17	2.71442e-15	39.411	59.021	39.315	85.789	107.678	95.424
TRINITY_DN193450_c0_g1	Picea sitchensis	XP_012850994.1 1-phosphatidylinositol 3-phosphate 5-kinase-like					369.429	-2.28192	2.03452e-17	3.2926e-15	11.239	21.264	10.097	38.526	56.746	64.334
TRINITY_DN172444_c0_g1	Picea sitchensis	PON78724.1Heavy metal-associated domain containing protein	P:GO:0030001; F:GO:0046872	P:metal ion transport; F:metal ion binding			98.0909	-3.05567	7.52211e-17	1.18322e-14	2.069	11.465	1.897	19.208	14.166	17.269
TRINITY_DN201306_c0_g1	Picea sitchensis	OVA11791.1Drug/metabolite transporter	P:GO:0055085; F:GO:0022857; C:GO:0005886; C:GO:0016021	P:transmembrane transport; F:transmembrane transporter activity; C:plasma membrane; C:integral component of membrane			1622.04	-1.43991	8.31934e-17	1.29651e-14	48.411	69.397	61.224	141.001	139.029	178.64
TRINITY_DN213012_c1_g6	Picea sitchensis	Q5XLY0.1RecName: Full=Putative anthocyanidin reductase; Short=GbANR	P:GO:0009813; P:GO:0055114; F:GO:0016491; C:GO:0016021	P:flavonoid biosynthetic process; P:oxidation-reduction process; F:oxidoreductase activity; C:integral component of membrane			1008.11	-2.22574	9.46195e-17	1.46105e-14	39.774	103.994	37.993	137.252	93.477	175.68
TRINITY_DN212473_c2_g2	Pinus banksiana	AFU73857.1(+)-3-carene synthase	P:GO:0043693; P:GO:0071395; F:GO:0000287; F:GO:0010333; C:GO:0009507	P:monoterpene biosynthetic process; P:cellular response to jasmonic acid stimulus; F:magnesium ion binding; F:terpene synthase activity; C:chloroplast			966.572	-2.1849	1.3908e-16	2.07155e-14	32.757	55.787	51.912	178.682	159.01	247.657
TRINITY_DN212265_c0_g1	Ginkgo biloba	AEO13438.1cinnamoyl-CoA reductase	P:GO:0055114; F:GO:0016616; F:GO:0016621	P:oxidation-reduction process; F:oxidoreductase activity, acting on the CH-OH group of donors, NAD or NADP as acceptor; F:cinnamoyl-CoA reductase activity	EC:1.2.1.44	Cinnamoyl-CoA reductase	2499.49	-1.11036	1.8731e-16	2.76546e-14	148.452	167.382	155.66	332.938	296.766	388.044
TRINITY_DN206251_c0_g1	Macleaya cordata	OVA12593.1Spermidine/spermine synthases family	F:GO:0003824	F:catalytic activity			477.739	-1.83027	3.12647e-16	4.49758e-14	13.766	8.988	12.319	42.253	38.004	57.196
TRINITY_DN198354_c0_g4	Picea sitchensis	AGY80771.1chalcone synthase	P:GO:0009813; F:GO:0016210	P:flavonoid biosynthetic process; F:naringenin-chalcone synthase activity	EC:2.3.1.74	Chalcone synthase	2602.5	-1.08143	3.18502e-16	4.53806e-14	295.721	287.516	259.571	578.202	540.725	659.379
TRINITY_DN213890_c0_g5							11477.5	-2.30774	3.20854e-16	4.53806e-14	1755.8	2318.15	956.78	6241.78	6181.27	7450
TRINITY_DN206803_c1_g2	Citrus clementina	XP_006437581.1cytochrome P450 86B1	P:GO:0055114; F:GO:0004497; F:GO:0005506; F:GO:0016491; F:GO:0016705; F:GO:0020037; F:GO:0046872; C:GO:0016020; C:GO:0016021	P:oxidation-reduction process; F:monooxygenase activity; F:iron ion binding; F:oxidoreductase activity; F:oxidoreductase activity, acting on paired donors, with incorporation or reduction of molecular oxygen; F:heme binding; F:metal ion binding; C:membrane; C:integral component of membrane			110.563	-3.24715	5.57448e-16	7.6905e-14	0.96	2.135	1.485	12.816	8.705	13.392
TRINITY_DN205546_c0_g1	Picea abies	ABG46325.1putative pectin methylesterase	P:GO:0042545; P:GO:0045490; F:GO:0016829; F:GO:0030599; F:GO:0045330; C:GO:0005576; C:GO:0005618; C:GO:0016021	P:cell wall modification; P:pectin catabolic process; F:lyase activity; F:pectinesterase activity; F:aspartyl esterase activity; C:extracellular region; C:cell wall; C:integral component of membrane	EC:3.1.1.11; EC:3.1.1.1	Pectinesterase; Carboxylesterase	1296.68	-1.81073	5.68322e-16	7.77677e-14	35.977	46.948	24.045	111.093	90.516	133.025
TRINITY_DN215543_c1_g4	Picea sitchensis	XP_021900324.1beta-galactosidase 10	P:GO:0005975; F:GO:0004553; F:GO:0030246; C:GO:0110165	P:carbohydrate metabolic process; F:hydrolase activity, hydrolyzing O-glycosyl compounds; F:carbohydrate binding; C:cellular anatomical entity			672.28	-1.00235	5.79259e-16	7.86251e-14	22.094	29.975	21.171	42.308	43.642	48.162
TRINITY_DN207648_c1_g1	Picea sitchensis	XP_009414992.1 protein EMBRYO SAC DEVELOPMENT ARREST 3, chloroplastic isoform X2	C:GO:0016021	C:integral component of membrane			2153.4	-1.1768	1.79518e-15	2.28899e-13	173.33	242.287	123.511	333.377	324.897	439.02
TRINITY_DN212473_c2_g1	Pinus banksiana	AFU73857.1(+)-3-carene synthase	P:GO:0043693; P:GO:0071395; F:GO:0000287; F:GO:0010333; C:GO:0009507	P:monoterpene biosynthetic process; P:cellular response to jasmonic acid stimulus; F:magnesium ion binding; F:terpene synthase activity; C:chloroplast			1113.82	-2.28553	1.94735e-15	2.46436e-13	20.814	34.853	33.567	120.192	107.584	180.081
TRINITY_DN213955_c0_g1	Eucalyptus grandis	XP_010062316.1 glutamate decarboxylase	P:GO:0006536; P:GO:0006538; P:GO:0019752; F:GO:0003824; F:GO:0004351; F:GO:0016829; F:GO:0016831; F:GO:0030170; C:GO:0005829	P:glutamate metabolic process; P:glutamate catabolic process; P:carboxylic acid metabolic process; F:catalytic activity; F:glutamate decarboxylase activity; F:lyase activity; F:carboxy-lyase activity; F:pyridoxal phosphate binding; C:cytosol			589.663	-1.43812	1.96222e-15	2.46464e-13	16.986	41.002	14.484	47	42.982	60.284
TRINITY_DN214241_c3_g3	Ricinus communis	XP_025015762.1fatty acyl-CoA reductase 2	P:GO:0009635; P:GO:0010345; P:GO:0010584; P:GO:0035336; P:GO:0055114; P:GO:1903175; F:GO:0016628; F:GO:0080019; F:GO:0102965; C:GO:0009507	P:response to herbicide; P:suberin biosynthetic process; P:pollen exine formation; P:long-chain fatty-acyl-CoA metabolic process; P:oxidation-reduction process; P:fatty alcohol biosynthetic process; F:oxidoreductase activity, acting on the CH-CH group of donors, NAD or NADP as acceptor; F:fatty-acyl-CoA reductase (alcohol-forming) activity; F:alcohol-forming fatty acyl-CoA reductase activity; C:c…	EC:1.2.1.84	Alcohol-forming fatty acyl-CoA reductase	965.602	-2.30724	2.09395e-15	2.61061e-13	23.15	57.591	29.936	132.954	98.926	166.295
TRINITY_DN207976_c0_g2	Pinus radiata	O65012.1RecName: Full=Cytochrome P450 78A4	P:GO:0055114; F:GO:0004497; F:GO:0005506; F:GO:0016705; F:GO:0020037; C:GO:0016021	P:oxidation-reduction process; F:monooxygenase activity; F:iron ion binding; F:oxidoreductase activity, acting on paired donors, with incorporation or reduction of molecular oxygen; F:heme binding; C:integral component of membrane			132.325	-3.9785	2.86949e-15	3.52528e-13	4.5	9.234	2.136	54.39	33.557	72.055
TRINITY_DN180285_c0_g1	Cinnamomum micranthum f. kanehirae	RWR75183.1Membrane lipoprotein	F:GO:0008080; C:GO:0016020; C:GO:0016021	F:N-acetyltransferase activity; C:membrane; C:integral component of membrane			485.235	-1.88165	3.657e-15	4.39649e-13	19.012	56.961	29.151	75.418	91.436	102.707
TRINITY_DN210515_c3_g1	Trifolium subterraneum	XP_012442791.1 putative UPF0481 protein At3g02645	C:GO:0016020; C:GO:0016021	C:membrane; C:integral component of membrane			350.058	-11.5	4.60742e-15	5.49982e-13	0	19.802	0	25.194	33.05	42.457
TRINITY_DN202534_c0_g1	Elaeis guineensis	NP_001275036.1NtPRp27-like protein precursor					83.8814	-3.98418	5.83113e-15	6.83576e-13	0.896	1.932	0.594	14.428	8.658	14.095
TRINITY_DN185658_c0_g2							195.716	-2.93119	5.84843e-15	6.83576e-13	17.648	39.593	8.785	106.861	79.263	120.783
TRINITY_DN202472_c0_g2	Tarenaya hassleriana	XP_010542042.1 subtilisin-like protease SBT5.3	F:GO:0008236; C:GO:0110165	F:serine-type peptidase activity; C:cellular anatomical entity			163.272	-1.75378	7.06221e-15	8.19752e-13	7.571	21.424	8.468	29.47	25.548	28.851
TRINITY_DN206978_c1_g2	Picea sitchensis	ABK20922.1unknown	C:GO:0005886	C:plasma membrane			1116.46	-1.25258	1.56525e-14	1.74468e-12	174.78	248.446	135.801	393.259	328.07	412.657
TRINITY_DN207647_c3_g6	Pinus taeda	AZA14786.1Homeobox protein knotted-1-like 1	P:GO:0006357; F:GO:0000981; F:GO:0003677; C:GO:0005634	P:regulation of transcription by RNA polymerase II; F:DNA-binding transcription factor activity, RNA polymerase II-specific; F:DNA binding; C:nucleus			907.328	-1.06864	2.29031e-14	2.53607e-12	19.023	23.848	17.464	33.658	36.824	42.414
TRINITY_DN204318_c0_g3	Picea sitchensis	RWR74502.1putative transmembrane protein	C:GO:0016021	C:integral component of membrane			410.472	-1.32243	4.34824e-14	4.66148e-12	30.646	75.621	39.315	85.548	92.722	84.923
TRINITY_DN211306_c5_g2	Ginkgo biloba	BAD93169.1MADS-box transcription factor GbMADS5	P:GO:0007275; P:GO:0045944; P:GO:1900458; F:GO:0000977; F:GO:0000981; F:GO:0008134; F:GO:0046983; C:GO:0005634; C:GO:0016021	P:multicellular organism development; P:positive regulation of transcription by RNA polymerase II; P:negative regulation of brassinosteroid mediated signaling pathway; F:RNA polymerase II regulatory region sequence-specific DNA binding; F:DNA-binding transcription factor activity, RNA polymerase II-specific; F:transcription factor binding; F:protein dimerization activity; C:nucleus; C:integral co…			865.275	-1.26178	4.44019e-14	4.72993e-12	45.094	57.057	54.278	102.87	108.327	111.046
TRINITY_DN213455_c0_g1	Ananas comosus	XP_020104735.1probable flavin-containing monooxygenase 1	F:GO:0016491	F:oxidoreductase activity			61.4337	-3.82237	4.67491e-14	4.94865e-12	0.533	1.003	0.345	6.929	6.841	6.297
TRINITY_DN205821_c2_g1							282.163	-1.31348	5.55169e-14	5.84003e-12	20.612	33.914	21.334	55.157	49.41	54.013
TRINITY_DN209307_c2_g5	Pinus taeda/Pinus radiata	XP_002974589.2abscisic acid receptor PYL8	P:GO:0009738; P:GO:0032515; P:GO:0080163; F:GO:0004864; F:GO:0010427; F:GO:0038023; F:GO:0042803; C:GO:0005634; C:GO:0005737; C:GO:0016020	P:abscisic acid-activated signaling pathway; P:negative regulation of phosphoprotein phosphatase activity; P:regulation of protein serine/threonine phosphatase activity; F:protein phosphatase inhibitor activity; F:abscisic acid binding; F:signaling receptor activity; F:protein homodimerization activity; C:nucleus; C:cytoplasm; C:membrane			220.402	-1.8213	6.46052e-14	6.75385e-12	15.067	23.271	11.534	42.308	45.671	55.935
TRINITY_DN214241_c3_g1	Cryptomeria japonica	OAY80869.1Fatty acyl-CoA reductase 2	P:GO:0006725; P:GO:0044238; P:GO:0044281; P:GO:1901360; P:GO:1901576; F:GO:0016620; C:GO:0043231	P:cellular aromatic compound metabolic process; P:primary metabolic process; P:small molecule metabolic process; P:organic cyclic compound metabolic process; P:organic substance biosynthetic process; F:oxidoreductase activity, acting on the aldehyde or oxo group of donors, NAD or NADP as acceptor; C:intracellular membrane-bounded organelle			681.085	-2.00868	6.56854e-14	6.82439e-12	26.935	72.61	43.865	147.502	119.296	178.931
TRINITY_DN196768_c0_g1	Pinus radiata	RWR80188.1shikimate O-hydroxycinnamoyltransferase	F:GO:0016747	F:transferase activity, transferring acyl groups other than amino-acyl groups			3168.01	-1.20216	6.85186e-14	7.07507e-12	110.428	161.468	95.529	238.159	207.488	290.286
TRINITY_DN208274_c1_g3	Ginkgo biloba	XP_020705590.1transcription repressor MYB6 isoform X1	F:GO:0003677; C:GO:0005634	F:DNA binding; C:nucleus			178.731	-2.85315	7.22628e-14	7.37124e-12	4.969	4.014	2.778	28.604	20.925	37.876
TRINITY_DN198119_c0_g6	Pinus pinaster	ADL29575.1water-stress inducible protein 3					5348.04	-1.15103	7.87986e-14	7.92668e-12	1120.01	1927.76	1078.9	2607.65	2029.01	2506.2
TRINITY_DN206039_c1_g1	Tarenaya hassleriana	XP_010537533.1 ABC transporter G family member 11	P:GO:0009611; P:GO:0009651; P:GO:0009737; P:GO:0010222; P:GO:0010345; P:GO:0010588; P:GO:0015908; P:GO:0042335; P:GO:0055085; P:GO:0080051; F:GO:0005524; F:GO:0015245; F:GO:0015562; F:GO:0016887; F:GO:0042803; C:GO:0009897; C:GO:0016021	P:response to wounding; P:response to salt stress; P:response to abscisic acid; P:stem vascular tissue pattern formation; P:suberin biosynthetic process; P:cotyledon vascular tissue pattern formation; P:fatty acid transport; P:cuticle development; P:transmembrane transport; P:cutin transport; F:ATP binding; F:fatty acid transmembrane transporter activity; F:efflux transmembrane transporter activi…	EC:3.6.1.3; EC:3.6.1.15	Adenosinetriphosphatase; Nucleoside-triphosphate phosphatase	1630.81	-1.29196	7.91208e-14	7.92668e-12	36.372	40.298	30.483	76.317	75.17	97.86
TRINITY_DN203000_c0_g2	Picea sitchensis	XP_019182669.1 PLAT domain-containing protein 3-like	P:GO:0055114; P:GO:0098869; F:GO:0004096; F:GO:0020037; C:GO:0016021	P:oxidation-reduction process; P:cellular oxidant detoxification; F:catalase activity; F:heme binding; C:integral component of membrane	EC:1.11.1.7; EC:1.11.1.6	Peroxidase; Catalase	899.44	-1.78443	9.98303e-14	9.82599e-12	31.638	121.683	54.69	155.363	140.044	154.687
TRINITY_DN200720_c1_g1	Artemisia annua	PWA99549.1homeodomain-like protein	P:GO:0030154; F:GO:0000976; C:GO:0005634	P:cell differentiation; F:transcription regulatory region sequence-specific DNA binding; C:nucleus			274.779	-1.33272	1.44455e-13	1.39731e-11	11.665	17.635	13.086	29.382	31.682	33.964
TRINITY_DN211247_c0_g1	Pinus pinaster	APA32586.1arogenate dehydratase	P:GO:0009094; F:GO:0004664; F:GO:0047769; C:GO:0009570	P:L-phenylalanine biosynthetic process; F:prephenate dehydratase activity; F:arogenate dehydratase activity; C:chloroplast stroma	EC:4.2.1.51; EC:4.2.1.91	Prephenate dehydratase; Arogenate dehydratase	119.799	-2.13684	1.54575e-13	1.47822e-11	6.398	8.999	9.359	30.862	35.704	35.86
TRINITY_DN208239_c0_g3							110.34	-2.24984	1.79502e-13	1.70689e-11	4.553	8.198	3.554	19.175	17.646	22.751
TRINITY_DN208582_c0_g3	Picea sitchensis	XP_008792350.1BURP domain-containing protein 3					7461.6	-1.47631	2.09902e-13	1.97366e-11	249.326	454.738	272.772	779.217	560.352	904.265
TRINITY_DN176142_c0_g2	Cuscuta australis	XP_015170357.1 histone H2B.3	P:GO:0006334; F:GO:0003677; F:GO:0046982; C:GO:0000786; C:GO:0005634	P:nucleosome assembly; F:DNA binding; F:protein heterodimerization activity; C:nucleosome; C:nucleus			411.79	-1.09944	2.38666e-13	2.23166e-11	29.398	26.922	26.833	59.893	58.339	66.307
TRINITY_DN186519_c0_g2	Pinus taeda	AZA14769.1Fasciclin-like arabinogalactan protein 8	P:GO:0007155; F:GO:0016755; C:GO:0046658	P:cell adhesion; F:transferase activity, transferring amino-acyl groups; C:anchored component of plasma membrane			736.397	-1.16091	2.64458e-13	2.44566e-11	16.635	33.145	20.663	44.731	39.997	43.847
TRINITY_DN214135_c3_g4	Cucumis melo	XP_008454198.2 putative UPF0481 protein At3g02645	C:GO:0016020; C:GO:0016021	C:membrane; C:integral component of membrane			92.1825	-6.56893	3.09372e-13	2.84538e-11	0.117	10.739	0.086	10.47	7.384	12.311
TRINITY_DN206102_c1_g1	Picea sitchensis	AAM28917.1putative TIR/NBS/LRR disease resistance protein	P:GO:0007165; F:GO:0043531	P:signal transduction; F:ADP binding			195.681	-10.661	3.13751e-13	2.86997e-11	0	11.145	0	7.477	9.932	10.466
TRINITY_DN210547_c1_g1	Picea sitchensis	ABK24815.1unknown	P:GO:0006629	P:lipid metabolic process			99.5192	-5.19645	3.47721e-13	3.16351e-11	0.309	2.754	0.527	14.647	7.077	20.77
TRINITY_DN209307_c2_g1	Picea sitchensis	RDX67243.1Abscisic acid receptor PYL6	P:GO:0009738; P:GO:0032515; P:GO:0080163; F:GO:0004864; F:GO:0010427; F:GO:0038023; C:GO:0005634; C:GO:0005737	P:abscisic acid-activated signaling pathway; P:negative regulation of phosphoprotein phosphatase activity; P:regulation of protein serine/threonine phosphatase activity; F:protein phosphatase inhibitor activity; F:abscisic acid binding; F:signaling receptor activity; C:nucleus; C:cytoplasm			187.735	-1.48216	3.95581e-13	3.57958e-11	6.483	9.127	6.84	17.914	18.011	20.092
TRINITY_DN214926_c2_g6	Pinus banksiana	AAC49539.1alcohol dehydrogenase	P:GO:0055114; F:GO:0004022; F:GO:0008270; F:GO:0016491; F:GO:0046872	P:oxidation-reduction process; F:alcohol dehydrogenase (NAD+) activity; F:zinc ion binding; F:oxidoreductase activity; F:metal ion binding			239.157	-1.79542	4.54275e-13	4.08872e-11	29.665	48.176	19.667	78.498	79.853	88.355
TRINITY_DN207194_c0_g1	Pinus taeda	ABG73247.1class III HD-Zip protein HDZ33	F:GO:0003677; F:GO:0008289; C:GO:0005634	F:DNA binding; F:lipid binding; C:nucleus			570.801	-1.0537	4.96873e-13	4.44833e-11	11.921	10.76	13.344	25.709	27.648	26.749
TRINITY_DN2349_c0_g1	Durio zibethinus	XP_022764562.1probable membrane-associated kinase regulator 4	P:GO:0016310; P:GO:0033673; F:GO:0016301; F:GO:0019210; C:GO:0005886	P:phosphorylation; P:negative regulation of kinase activity; F:kinase activity; F:kinase inhibitor activity; C:plasma membrane			82.0954	-2.81802	6.00525e-13	5.31971e-11	0.789	7.344	1.552	8.234	7.337	8.862
TRINITY_DN193459_c0_g1							180.598	-10.5452	6.17328e-13	5.43992e-11	0	52.862	0	35.445	33.828	48.222
TRINITY_DN210331_c0_g1	Nelumbo nucifera	XP_010249421.1 peroxidase 41-like	P:GO:0006412; P:GO:0006979; P:GO:0042744; P:GO:0055114; P:GO:0098869; F:GO:0003735; F:GO:0004601; F:GO:0020037; F:GO:0046872; C:GO:0005576; C:GO:0015934; C:GO:0016021	P:translation; P:response to oxidative stress; P:hydrogen peroxide catabolic process; P:oxidation-reduction process; P:cellular oxidant detoxification; F:structural constituent of ribosome; F:peroxidase activity; F:heme binding; F:metal ion binding; C:extracellular region; C:large ribosomal subunit; C:integral component of membrane	EC:1.11.1.7	Peroxidase	106.55	-3.15652	6.31342e-13	5.53444e-11	1.973	2.252	2.414	18.397	13.411	25.454
TRINITY_DN208946_c0_g3	Picea sitchensis	CAC83360.1putative hydrophobic LEA-like protein	C:GO:0016020; C:GO:0016021	C:membrane; C:integral component of membrane			120.832	-3.97079	6.95547e-13	6.06567e-11	2.442	3.96	2.634	44.72	19.049	53.284
TRINITY_DN210005_c0_g1							547.584	-1.97793	9.75653e-13	8.37817e-11	62.763	101.091	43.022	287.341	167.81	294.404
TRINITY_DN208582_c0_g1	Picea sitchensis	XP_024031663.1BURP domain protein RD22	C:GO:0016020; C:GO:0016021	C:membrane; C:integral component of membrane			5052.83	-1.20465	9.97453e-13	8.5219e-11	191.372	317.096	183.25	455.466	354.232	525.178
TRINITY_DN211793_c0_g3	Pinus taeda	RWR89970.1Glycosyltransferase AER61	F:GO:0016757	F:transferase activity, transferring glycosyl groups			229.159	-1.7887	1.00528e-12	8.54537e-11	5.929	15.116	5.623	16.094	12.196	19.612
TRINITY_DN199926_c0_g1	Marchantia polymorpha	XP_002990605.1probable UDP-arabinose 4-epimerase 2 isoform X1	P:GO:0005975; F:GO:0016853; C:GO:0016020	P:carbohydrate metabolic process; F:isomerase activity; C:membrane			994.896	-1.05061	1.04072e-12	8.80215e-11	36.041	49.286	33.222	72.227	63.941	83.379
TRINITY_DN206596_c2_g4							155.036	-1.7162	1.10233e-12	9.27663e-11	13.169	30.583	17.675	50.936	61.17	59.135
TRINITY_DN194021_c0_g2	Picea sitchensis	XP_002983322.1glycerol-3-phosphate 2-O-acyltransferase 6	P:GO:0010143; F:GO:0016791; F:GO:0090447; C:GO:0016021	P:cutin biosynthetic process; F:phosphatase activity; F:glycerol-3-phosphate 2-O-acyltransferase activity; C:integral component of membrane			392.573	-1.69123	1.25914e-12	1.05435e-10	7.091	10.888	7.463	25.676	18.082	28.379
TRINITY_DN195987_c0_g1							157.62	-2.35355	1.28553e-12	1.07113e-10	5.929	6.373	5.345	31.377	21.007	35.517
TRINITY_DN206803_c0_g1	Citrus clementina	XP_006437581.1cytochrome P450 86B1	F:GO:0005488; F:GO:0016491	F:binding; F:oxidoreductase activity			141.012	-2.69123	1.74609e-12	1.4129e-10	1.994	4.281	2.127	16.357	8.976	15.828
TRINITY_DN213534_c0_g4	Picea sitchensis	ADM76808.1auxin efflux carrier-like protein	P:GO:0055085; C:GO:0016021	P:transmembrane transport; C:integral component of membrane			1520.58	-1.08278	2.22329e-12	1.79044e-10	81.083	99.041	72.097	164.66	130.124	166.337
TRINITY_DN211274_c2_g1	Picea glauca	ASU43998.1UDP-glycosyltransferase UGT5d	F:GO:0008194	F:UDP-glycosyltransferase activity			73.4998	-3.49707	2.8494e-12	2.2729e-10	1.429	2.178	0.345	11.062	10.627	13.881
TRINITY_DN130022_c0_g2	Picea sitchensis	XP_011627035.1 tetraspanin-20	C:GO:0016020; C:GO:0016021	C:membrane; C:integral component of membrane			82.2302	-3.30597	2.94429e-12	2.33752e-10	1.589	2.669	0.738	13.847	8.858	13.984
TRINITY_DN214054_c1_g1	Picea sitchensis	ABK22431.1unknown					2442.97	-1.39929	3.58476e-12	2.83089e-10	286.786	417.461	205.637	730.002	644.699	583.395
TRINITY_DN214601_c1_g5	Picea sitchensis	AES89452.1cytochrome P450 family protein	F:GO:0004497; F:GO:0016705; F:GO:0046872; C:GO:0016020	F:monooxygenase activity; F:oxidoreductase activity, acting on paired donors, with incorporation or reduction of molecular oxygen; F:metal ion binding; C:membrane			286.711	-2.28113	3.70779e-12	2.90259e-10	9.01	23.645	7.089	39.183	26.362	48.437
TRINITY_DN215385_c4_g4							199.523	-1.60893	4.32305e-12	3.35305e-10	19.322	77.852	28.979	66.757	78.261	71.626
TRINITY_DN203046_c0_g1							222.626	-1.904	4.6175e-12	3.53259e-10	11.921	15.575	7.252	39.918	30.608	37.387
TRINITY_DN212071_c2_g1	Amborella trichopoda	XP_011624098.1methyl-CpG-binding domain-containing protein 5 isoform X3	F:GO:0003677; C:GO:0042025	F:DNA binding; C:host cell nucleus			156.272	-1.72543	4.81092e-12	3.66392e-10	5.428	12.906	4.359	15.097	14.201	19.406
TRINITY_DN198352_c0_g1	Macleaya cordata	OVA16974.1zinc finger protein	F:GO:0003824	F:catalytic activity			664.042	-1.33992	4.99428e-12	3.78643e-10	19.588	29.569	25.951	55.804	55.72	70.716
TRINITY_DN215426_c3_g1	Picea sitchensis	RWR83799.1putative disease resistance protein	F:GO:0000166	F:nucleotide binding			237.206	-2.18413	6.1638e-12	4.63138e-10	8.381	24.926	5.911	22.661	19.792	25.608
TRINITY_DN210600_c0_g3	Actinidia chinensis var. chinensis	PSS30615.1Heavy metal-associated isoprenylated plant protein	P:GO:0030001; F:GO:0046872	P:metal ion transport; F:metal ion binding			140.002	-3.60426	6.28656e-12	4.70262e-10	4.543	18.542	2.644	42.659	22.706	66.187
TRINITY_DN208307_c1_g1	Pinus taeda	AGX45528.14-coumarate:CoA ligase	F:GO:0016207	F:4-coumarate-CoA ligase activity	EC:6.2.1.12	4-coumarate--CoA ligase	5128.16	-1.14902	7.43712e-12	5.46612e-10	124.535	116.58	146.32	309.904	258.031	362.221
TRINITY_DN204045_c0_g1	Picea sitchensis	XP_026436350.1HVA22-like protein f	C:GO:0016021	C:integral component of membrane			183.929	-1.7249	1.06736e-11	7.67725e-10	12.124	16.674	11.802	33.965	34.654	45.288
TRINITY_DN196450_c0_g1	Picea sitchensis	RDX69983.1GDSL esterase/lipase LTL1	F:GO:0016788	F:hydrolase activity, acting on ester bonds			4786.33	-1.3646	1.11923e-11	8.01608e-10	142.151	217.073	177.646	410.417	344.807	524.123
TRINITY_DN214945_c2_g1	Abies alba	ABD24253.1chalcone synthase	P:GO:0009058; F:GO:0016210	P:biosynthetic process; F:naringenin-chalcone synthase activity	EC:2.3.1.74	Chalcone synthase	1241.37	-1.15483	1.14148e-11	8.14077e-10	421.291	331.54	393.859	898.346	794.25	962.945
TRINITY_DN213469_c1_g3							1060.86	-1.83028	1.24576e-11	8.77297e-10	35.412	192.927	71.062	175.92	168.647	211.712
TRINITY_DN205833_c0_g2	Picea sitchensis	XP_010251592.1 methionine gamma-lyase	P:GO:0019343; P:GO:0019346; F:GO:0004123; F:GO:0018826; F:GO:0030170; C:GO:0005737	P:cysteine biosynthetic process via cystathionine; P:transsulfuration; F:cystathionine gamma-lyase activity; F:methionine gamma-lyase activity; F:pyridoxal phosphate binding; C:cytoplasm	EC:4.4.1.11; EC:4.4.1.1	Methionine gamma-lyase; Cystathionine gamma-lyase	439.401	-1.30587	1.88259e-11	1.2676e-09	36.02	77.777	48.636	117.715	105.107	142.771
TRINITY_DN202466_c0_g6	Picea sitchensis	ABK26854.1unknown					102.518	-3.2046	1.88283e-11	1.2676e-09	2.463	6.661	1.6	21.214	12.255	25.488
TRINITY_DN205569_c1_g6							761.632	-1.00945	2.96753e-11	1.97417e-09	137.619	237.345	118.328	241.832	248.37	279.683
TRINITY_DN212445_c0_g1	Picea sitchensis	XP_020550990.1GDSL esterase/lipase EXL3-like	C:GO:0110165	C:cellular anatomical entity			195.964	-2.42171	3.243e-11	2.14051e-09	6.078	15.511	2.261	22.19	22.611	26.44
TRINITY_DN209107_c2_g1	Larix sibirica	AGC11129.1LRR receptor-like protein kinase	P:GO:0016310; F:GO:0016301	P:phosphorylation; F:kinase activity			566.115	-1.07648	3.27538e-11	2.1492e-09	18.458	26.26	20.338	40.269	35.067	45.031
TRINITY_DN211838_c0_g2	Vitis vinifera	XP_002268278.2 indole-3-acetic acid-amido synthetase GH3.17	F:GO:0016881; C:GO:0005737	F:acid-amino acid ligase activity; C:cytoplasm			254.435	-1.39527	3.28171e-11	2.1492e-09	4.308	7.761	5.987	13.222	13.081	14.267
TRINITY_DN211429_c3_g5	Papaver somniferum	XP_026383088.1bark storage protein A-like isoform X2					1290.81	-1.14422	3.99773e-11	2.60797e-09	69.95	71.276	56.453	143.457	129.853	165.857
TRINITY_DN212176_c0_g1							958.907	-3.74844	4.11203e-11	2.66191e-09	18.543	22.46	5.949	180.119	143.193	182.56
TRINITY_DN211997_c0_g2	Selaginella moellendorffii	ABZ69017.1SET domain-containing protein C					649.915	-1.25292	6.49493e-11	4.12514e-09	29.174	51.133	36.93	62.174	81.493	76.962
TRINITY_DN204798_c0_g1	Picea sitchensis	ABK21416.1unknown					380.955	-2.0742	6.60043e-11	4.17638e-09	36.596	51.944	22.685	124.589	94.019	160.204
TRINITY_DN214274_c6_g2							47.213	-4.79886	8.38564e-11	5.22736e-09	0.171	6.255	0.326	4.385	4.624	5.37
TRINITY_DN214138_c3_g1							299.857	-1.75917	8.72777e-11	5.42056e-09	8.978	28.139	12.837	42.33	37.52	47.708
TRINITY_DN205964_c0_g1	Tarenaya hassleriana	XP_019056547.1 beta-galactosidase 8	P:GO:0005975; F:GO:0004565; F:GO:0030246; C:GO:0005618; C:GO:0005773	P:carbohydrate metabolic process; F:beta-galactosidase activity; F:carbohydrate binding; C:cell wall; C:vacuole	EC:3.2.1.23	Beta-galactosidase	309.302	-1.24476	9.03469e-11	5.59055e-09	16.507	22.246	12.415	32.847	31.729	32.531
TRINITY_DN198065_c0_g1							171.705	-2.19591	9.7345e-11	6.00152e-09	22.094	45.816	14.398	73.631	70.382	106.645
TRINITY_DN206803_c1_g1	Mucuna pruriens	RDX81370.1Cytochrome P450 86B1	F:GO:0005488; F:GO:0016491	F:binding; F:oxidoreductase activity			194.759	-2.52032	1.1817e-10	7.12872e-09	2.527	1.751	2.615	16.083	9.295	21.096
TRINITY_DN205093_c0_g1							57.6066	-3.75254	1.21368e-10	7.29094e-09	1.152	4.056	0.565	12.729	8.103	14.275
TRINITY_DN199156_c1_g1	Picea sitchensis	XP_006828268.1GDSL esterase/lipase At5g45910	F:GO:0016788	F:hydrolase activity, acting on ester bonds			106.671	-2.10515	1.21725e-10	7.29094e-09	5.886	7.28	4.244	20.195	20.099	27.024
TRINITY_DN196631_c0_g1	Selaginella moellendorffii	XP_002963727.2glutamate receptor 3.3	C:GO:0016020	C:membrane			74.9496	-3.56162	1.36849e-10	8.13892e-09	0.661	2.242	0.69	8.858	4.966	12.011
TRINITY_DN198354_c0_g2	Picea sitchensis	AEN84256.1chalcone synthase	P:GO:0009058; F:GO:0016747	P:biosynthetic process; F:transferase activity, transferring acyl groups other than amino-acyl groups			483.665	-2.00981	1.66866e-10	9.88914e-09	148.804	179.551	91.227	520.545	401.471	459.875
TRINITY_DN193883_c0_g1	Picea sitchensis	XP_012074025.1BAHD acyltransferase DCR	F:GO:0016747	F:transferase activity, transferring acyl groups other than amino-acyl groups			136.391	-1.53075	1.78812e-10	1.0523e-08	6.121	14.08	6.112	17.673	16.891	20.126
TRINITY_DN213644_c0_g2	Amborella trichopoda	XP_006849643.1transcription factor WER	P:GO:0030154; F:GO:0000976; C:GO:0005634	P:cell differentiation; F:transcription regulatory region sequence-specific DNA binding; C:nucleus			51.3334	-4.62744	1.81409e-10	1.06387e-08	0.245	2.466	1.59	13.397	18.542	13.126
TRINITY_DN212403_c3_g1	Sesamum indicum	XP_011088148.2probable xyloglucan endotransglucosylase/hydrolase protein 10	P:GO:0006073; P:GO:0071554; P:GO:0071840; F:GO:0016757; F:GO:0016798; C:GO:0005576	P:cellular glucan metabolic process; P:cell wall organization or biogenesis; P:cellular component organization or biogenesis; F:transferase activity, transferring glycosyl groups; F:hydrolase activity, acting on glycosyl bonds; C:extracellular region			302.364	-1.65565	2.10445e-10	1.22138e-08	11.634	19.727	8.382	35.565	25.301	36.684
TRINITY_DN208503_c0_g1	Picea sitchensis	AAC05147.121 kD protein precursor	P:GO:0043086; F:GO:0004857	P:negative regulation of catalytic activity; F:enzyme inhibitor activity			312.091	-1.50077	2.17539e-10	1.25821e-08	8.253	11.753	11.63	25.117	32.118	28.842
TRINITY_DN199690_c0_g1	Nelumbo nucifera	XP_010244565.1 acid phosphatase 1	P:GO:0016311; F:GO:0003993	P:dephosphorylation; F:acid phosphatase activity			156.933	-1.92156	2.35713e-10	1.35402e-08	6.771	8.988	4.732	22.705	18.023	26.981
TRINITY_DN207869_c0_g1	Picea sitchensis	XP_010278702.1 protein DETOXIFICATION 40-like isoform X1	P:GO:0042908; P:GO:0055085; F:GO:0015297; F:GO:0042910; C:GO:0005774; C:GO:0016021	P:xenobiotic transport; P:transmembrane transport; F:antiporter activity; F:xenobiotic transmembrane transporter activity; C:vacuolar membrane; C:integral component of membrane			60.4787	-3.0553	2.75698e-10	1.57832e-08	0.778	2.146	0.987	4.824	6.405	8.304
TRINITY_DN198400_c0_g2							93.1507	-2.55477	2.91167e-10	1.65004e-08	5.15	5.796	8.248	40.093	29.205	47.021
TRINITY_DN214945_c3_g1	Picea sitchensis	AEN84254.1 chalcone synthase	P:GO:0006633; P:GO:0009813; F:GO:0004315; F:GO:0016210	P:fatty acid biosynthetic process; P:flavonoid biosynthetic process; F:3-oxoacyl-[acyl-carrier-protein] synthase activity; F:naringenin-chalcone synthase activity	EC:2.3.1.41; EC:2.3.1.74; EC:2.3.1.85	Beta-ketoacyl-[acyl-carrier-protein] synthase I; Chalcone synthase; Fatty-acid synthase system	725.495	-1.74882	3.23093e-10	1.81327e-08	92.322	80.777	65.745	300.487	191.412	304.382
TRINITY_DN212445_c0_g2	Picea sitchensis	EFH59153.1GDSL-motif lipase/hydrolase family protein	P:GO:0006629; F:GO:0016298; C:GO:0016021	P:lipid metabolic process; F:lipase activity; C:integral component of membrane			783.408	-1.74664	3.23201e-10	1.81327e-08	24.099	30.455	24.352	83.246	56.18	112.71
TRINITY_DN186381_c0_g1							102.305	-3.34005	3.31006e-10	1.85088e-08	0.554	6.971	2.318	12.005	16.608	14.198
TRINITY_DN137108_c0_g1							172.713	-1.38395	3.69398e-10	2.05872e-08	15.078	20.869	12.262	36.333	34.843	38.211
TRINITY_DN203879_c0_g4	Picea sitchensis	XP_027092768.1probable strigolactone esterase DAD2	P:GO:0010223; P:GO:1901601; F:GO:0016788	P:secondary shoot formation; P:strigolactone biosynthetic process; F:hydrolase activity, acting on ester bonds			61.0215	-2.8399	4.80576e-10	2.66071e-08	1.578	4.782	0.738	7.642	8.41	10.269
TRINITY_DN203068_c0_g1							230.935	-1.62291	5.15179e-10	2.83365e-08	3.21	6.373	4.742	11.72	11.559	14.721
TRINITY_DN205149_c0_g1	Picea sitchensis	XP_020521978.1probable polygalacturonase At1g80170	P:GO:0009901; P:GO:0010047; P:GO:0045490; F:GO:0004650; C:GO:0110165	P:anther dehiscence; P:fruit dehiscence; P:pectin catabolic process; F:polygalacturonase activity; C:cellular anatomical entity	EC:3.2.1.15	Endo-polygalacturonase	332.566	-1.27461	5.70978e-10	3.13033e-08	10.631	19.695	8.104	22.694	21.255	27.684
TRINITY_DN167312_c0_g1	Pinus pinaster	ATP62223.1constans-like 1 protein	F:GO:0008270; C:GO:0005634	F:zinc ion binding; C:nucleus			1167.29	-1.38908	5.90296e-10	3.2153e-08	31.414	19.62	18.393	64.827	63.706	77.468
TRINITY_DN201044_c0_g3	Pinus pinaster	AAS47494.1iron superoxide dismutase	P:GO:0006289; P:GO:0006351; P:GO:0019430; P:GO:0055114; F:GO:0004784; F:GO:0046872; C:GO:0000439; C:GO:0042644	P:nucleotide-excision repair; P:transcription, DNA-templated; P:removal of superoxide radicals; P:oxidation-reduction process; F:superoxide dismutase activity; F:metal ion binding; C:transcription factor TFIIH core complex; C:chloroplast nucleoid	EC:1.15.1.1	Superoxide dismutase	527.868	-1.97326	6.23008e-10	3.38208e-08	17.061	42.294	8.65	56.736	39.478	59.212
TRINITY_DN210993_c0_g1	Selaginella moellendorffii	XP_012449878.1 UPF0695 membrane protein C977.11/PB8B6.06c isoform X2	P:GO:1903424; F:GO:1903425; C:GO:0005887	P:fluoride transmembrane transport; F:fluoride transmembrane transporter activity; C:integral component of plasma membrane			129.226	-2.119	6.38761e-10	3.43482e-08	4.809	5.284	3.228	18.265	12.361	12.663
TRINITY_DN212308_c1_g3	Nelumbo nucifera	XP_010262942.1 AP2/ERF and B3 domain-containing transcription factor RAV1-like	P:GO:0006355; F:GO:0003677; F:GO:0003700; C:GO:0005634	P:regulation of transcription, DNA-templated; F:DNA binding; F:DNA-binding transcription factor activity; C:nucleus			204.762	-1.25038	7.18023e-10	3.82438e-08	6.195	8.337	7.271	15.426	16.855	16.592
TRINITY_DN212576_c2_g6							43.1052	-3.27017	7.80592e-10	4.10567e-08	1.759	4.334	1.916	17.838	15.192	19.114
TRINITY_DN203237_c1_g2	Abies alba	ABD24236.1chalcone synthase	P:GO:0009058; F:GO:0016747	P:biosynthetic process; F:transferase activity, transferring acyl groups other than amino-acyl groups			492.112	-1.86808	8.07573e-10	4.2212e-08	209.446	248.713	131.309	585.471	561.437	600.09
TRINITY_DN196444_c1_g1							564.644	-1.04147	8.13436e-10	4.23868e-08	25.602	23.527	20.922	50.114	43.359	54.279
TRINITY_DN260697_c0_g4							64.9626	-9.07046	8.97405e-10	4.6618e-08	0	20.848	0	22.771	26.893	32.291
TRINITY_DN198111_c0_g1	Picea sitchensis	AKH04265.1putative FAD/FMN-containing dehydrogenas	P:GO:0055114; F:GO:0003885; F:GO:0071949; C:GO:0016020	P:oxidation-reduction process; F:D-arabinono-1,4-lactone oxidase activity; F:FAD binding; C:membrane	EC:1.1.3.37	D-arabinono-1,4-lactone oxidase	119.287	-1.94993	9.00794e-10	4.665e-08	2.559	5.839	2.299	9.396	8.363	11.976
TRINITY_DN208829_c0_g1							130.112	-1.91324	1.09117e-09	5.56529e-08	2.517	3.704	2.931	11.391	8.091	12.276
TRINITY_DN166517_c0_g1	Pinus radiata	O65012.1RecName: Full=Cytochrome P450 78A4	P:GO:0055114; F:GO:0004497; F:GO:0005506; F:GO:0016705; F:GO:0020037; C:GO:0016021	P:oxidation-reduction process; F:monooxygenase activity; F:iron ion binding; F:oxidoreductase activity, acting on paired donors, with incorporation or reduction of molecular oxygen; F:heme binding; C:integral component of membrane			73.0792	-6.77723	1.14415e-09	5.8179e-08	0	0	1.226	42.878	34.288	74.028
TRINITY_DN151127_c0_g3	Picea sitchensis	AEN84251.1 chalcone synthase	P:GO:0006633; F:GO:0004315	P:fatty acid biosynthetic process; F:3-oxoacyl-[acyl-carrier-protein] synthase activity	EC:2.3.1.41; EC:2.3.1.85	Beta-ketoacyl-[acyl-carrier-protein] synthase I; Fatty-acid synthase system	78.7266	-9.34717	1.24734e-09	6.3235e-08	0	24.755	0	61.395	27.471	77.314
TRINITY_DN127638_c0_g1							39.558	-3.51988	1.52072e-09	7.63583e-08	0.235	0.651	0.335	2.916	3.149	3.62
TRINITY_DN208375_c1_g1							344.051	-1.18879	1.60113e-09	7.94943e-08	23.352	24.211	24.917	55.552	47.074	60.473
TRINITY_DN207532_c2_g3	Pinus hwangshanensis	AIF75853.1putative proline-rich arabinogalactan protein					9373.6	-1.24691	1.67574e-09	8.26574e-08	499.612	627.564	306.483	977.908	922.215	1052.54
TRINITY_DN212473_c4_g3	Pinus contorta	AFU73861.1alpha terpineol /1,8-cineole synthase	P:GO:0043693; P:GO:0071395; F:GO:0000287; F:GO:0010333; F:GO:0102703; C:GO:0009507	P:monoterpene biosynthetic process; P:cellular response to jasmonic acid stimulus; F:magnesium ion binding; F:terpene synthase activity; F:camphene synthase activity; C:chloroplast	EC:4.2.3.117	(-)-camphene synthase	307.715	-5.59983	2.2932e-09	1.1091e-07	3.892	33.423	0.297	117.375	103.243	98.915
TRINITY_DN211094_c0_g1	Picea sitchensis	OVA08126.1Choline/Ethanolamine kinase	P:GO:0006796; F:GO:0016301; F:GO:0016773	P:phosphate-containing compound metabolic process; F:kinase activity; F:phosphotransferase activity, alcohol group as acceptor			126.204	-1.61917	2.76203e-09	1.31693e-07	4.724	5.604	5.997	14.187	16.218	18.042
TRINITY_DN213793_c1_g3	Picea sitchensis	XP_010935685.1 probable pectate lyase 8 isoform X1	P:GO:0045490; F:GO:0030570; F:GO:0046872	P:pectin catabolic process; F:pectate lyase activity; F:metal ion binding	EC:4.2.2.2	Pectate lyase	485.898	-1.2096	3.0369e-09	1.42777e-07	25.933	34.49	21.957	52.888	48.926	68.717
TRINITY_DN205912_c2_g11	Esox lucius	XP_010876509.3 polyubiquitin-B	P:GO:0016567; P:GO:0019941; F:GO:0031386; F:GO:0031625; C:GO:0005634; C:GO:0005737	P:protein ubiquitination; P:modification-dependent protein catabolic process; F:protein tag; F:ubiquitin protein ligase binding; C:nucleus; C:cytoplasm			172.483	-1.45894	3.1253e-09	1.46117e-07	19.94	52.648	22.369	64.498	48.914	60.233
TRINITY_DN202468_c0_g1	Ginkgo biloba	ALR83536.1CLV3/ESR-related protein	C:GO:0016020; C:GO:0016021	C:membrane; C:integral component of membrane			268.639	-1.16249	3.19082e-09	1.48767e-07	5.214	7.27	6.677	13.682	13.163	14.087
TRINITY_DN214701_c1_g2	Pinus taeda	AFG44220.1hypothetical protein 0_1348_02, partial					135.777	-1.4099	3.87057e-09	1.78971e-07	10.258	16.076	10.863	28.79	28.072	25.565
TRINITY_DN214701_c1_g1	Physcomitrella patens	OBZ76730.1Small glutamine-rich tetratricopeptide repeat-containing protein beta	C:GO:0016020; C:GO:0016021	C:membrane; C:integral component of membrane			169.197	-1.46264	4.16244e-09	1.9194e-07	14.768	25.139	16.056	30.895	41.944	40.047
TRINITY_DN210547_c0_g1							55.3737	-5.34653	4.1844e-09	1.92425e-07	0.096	1.825	0.412	9.187	6.24	15.991
TRINITY_DN177971_c0_g1	Cinnamomum micranthum f. kanehirae	RWR95914.1protein BIG GRAIN 1-like protein B	P:GO:0009734	P:auxin-activated signaling pathway			298.985	-1.00867	4.33945e-09	1.99011e-07	8.392	11.828	9.35	17.147	18.058	19.766
TRINITY_DN212618_c0_g2	Elaeis guineensis	XP_010921579.1 UPF0481 protein At3g47200-like	C:GO:0016020; C:GO:0016021	C:membrane; C:integral component of membrane			51.8349	-8.74445	4.48323e-09	2.03036e-07	0	4.58	0	8.727	6.971	10.466
TRINITY_DN207603_c2_g6	Pinus taeda	Q50EK4.1RecName: Full=Cytochrome P450 750A1; AltName: Full=Cytochrome P450 CYPC	P:GO:0055114; F:GO:0004497; F:GO:0005506; F:GO:0016705; F:GO:0020037; C:GO:0016021	P:oxidation-reduction process; F:monooxygenase activity; F:iron ion binding; F:oxidoreductase activity, acting on paired donors, with incorporation or reduction of molecular oxygen; F:heme binding; C:integral component of membrane			1530.33	-1.28993	5.45734e-09	2.40144e-07	73.97	59.47	49.901	161.327	126.869	186.695
TRINITY_DN162419_c0_g2							161.008	-2.83996	9.71706e-09	4.17214e-07	10.365	26.837	7.099	31.509	66.289	92.181
TRINITY_DN214796_c4_g5	Acinetobacter baumannii	WP_071414642.1hypothetical protein					725.177	-1.79236	1.02052e-08	4.34843e-07	75.047	127.522	56.463	268.243	155.578	266.162
TRINITY_DN214743_c1_g4	Pinus radiata	AGY80772.1flavanone 3-hydroxylase	P:GO:0055114; F:GO:0045486; F:GO:0046872	P:oxidation-reduction process; F:naringenin 3-dioxygenase activity; F:metal ion binding	EC:1.14.11; EC:1.14.11.9	Acting on paired donors, with incorporation or reduction of molecular oxygen. The oxygen incorporated need not be derived from O(2); Flavanone 3-dioxygenase	570.814	-1.0637	1.11765e-08	4.73834e-07	69.502	50.855	58.11	134.248	116.265	153.744
TRINITY_DN210670_c0_g2							39.4762	-4.25973	1.1463e-08	4.83543e-07	0.128	5.081	0.383	2.763	3.951	5.216
TRINITY_DN203500_c0_g4	Nelumbo nucifera	XP_019053680.1 protein SPA1-RELATED 3-like isoform X4	P:GO:0006468; F:GO:0004672; F:GO:0005524	P:protein phosphorylation; F:protein kinase activity; F:ATP binding			557.591	-1.15662	1.16579e-08	4.90536e-07	8.882	9.084	6.083	17.333	17.622	19.766
TRINITY_DN213720_c1_g1	Pinus taeda	AAM28908.1putative TIR/NBS/LRR disease resistance protein	P:GO:0007165; F:GO:0043531	P:signal transduction; F:ADP binding			238.577	-1.52036	1.39803e-08	5.80995e-07	15.302	58.488	22.895	49.708	44.881	62.626
TRINITY_DN205362_c0_g1	Picea sitchensis	PSR89913.1Late embryogenesis abundant protein, LEA-14 protein	C:GO:0016021	C:integral component of membrane			176.607	-1.86481	1.77832e-08	7.28245e-07	6.739	14.368	6.332	26.828	16.784	30.67
TRINITY_DN212897_c1_g1	Pinus taeda	ABG46324.1putative pectin methylesterase	F:GO:0016787	F:hydrolase activity			881.385	-1.39051	1.81773e-08	7.40778e-07	28.129	42.988	22.052	81.667	49.433	80.574
TRINITY_DN196820_c0_g1	Gossypium barbadense	XP_010654187.1 transcription factor bHLH49 isoform X1	P:GO:0006355; F:GO:0003700; F:GO:0046983; C:GO:0005634	P:regulation of transcription, DNA-templated; F:DNA-binding transcription factor activity; F:protein dimerization activity; C:nucleus			42.7558	-8.46689	1.88409e-08	7.64124e-07	0	0.512	0	12.63	10.309	16.66
TRINITY_DN187285_c0_g1	Ginkgo biloba	AEL13775.1pectate lyase	P:GO:0045490; F:GO:0030570; F:GO:0046872	P:pectin catabolic process; F:pectate lyase activity; F:metal ion binding	EC:4.2.2.2	Pectate lyase	235.387	-1.73894	1.89261e-08	7.65734e-07	86.276	134.941	55.284	239.563	215.757	221.294
TRINITY_DN214054_c0_g1							962.824	-1.48613	1.89805e-08	7.66094e-07	119.971	184.291	69.539	292.9	260.118	244.26
TRINITY_DN208243_c0_g2	Jatropha curcas	XP_012078738.1early nodulin-93 isoform X1	C:GO:0016021	C:integral component of membrane			309.25	-1.21644	1.90883e-08	7.68599e-07	16.272	26.281	19.408	46.101	38.405	38.039
TRINITY_DN208989_c4_g12	Picea sitchensis	XP_027366580.1 actin-like	F:GO:0005524; C:GO:0005737; C:GO:0005856	F:ATP binding; C:cytoplasm; C:cytoskeleton			532.26	-1.17826	1.92388e-08	7.72811e-07	34.165	34.853	22.378	66.537	63.34	67.19
TRINITY_DN147194_c0_g1							33.9078	-3.66934	2.50918e-08	9.7986e-07	1.237	4.11	0.642	11.906	14.402	11.384
TRINITY_DN213767_c1_g1	Picea sitchensis	XP_025655764.1abscisic acid receptor PYL4-like	C:GO:0016021	C:integral component of membrane			174.931	-1.46051	2.60395e-08	1.01452e-06	16.517	19.983	15.251	33.307	35.857	40.656
TRINITY_DN202558_c0_g2	Picea sitchensis	ABK23716.1unknown					162.866	-1.32202	3.15895e-08	1.21946e-06	13.883	22.471	11.371	31.279	29.169	36.435
TRINITY_DN200099_c0_g1							85.313	-1.91413	3.1826e-08	1.22057e-06	2.143	4.483	1.945	7.455	6.582	10.029
TRINITY_DN214796_c4_g1	Acinetobacter baumannii	WP_071414642.1hypothetical protein					47.092	-2.82371	3.3192e-08	1.26967e-06	6.952	22.374	7.539	41.497	39.95	62.258
TRINITY_DN211122_c0_g9	Picea sitchensis	ABK27066.1unknown	P:GO:0030001; F:GO:0046872	P:metal ion transport; F:metal ion binding			34.0978	-3.46375	3.50117e-08	1.33322e-06	0.778	8.113	1.542	8.398	10.639	11.856
TRINITY_DN214223_c1_g1	Pinus radiata	XP_024442090.1protein RESPONSE TO LOW SULFUR 2	P:GO:0098869	P:cellular oxidant detoxification			79.3456	-2.12102	3.59666e-08	1.36649e-06	13.681	21.809	8.871	52.712	43.595	45.357
TRINITY_DN210572_c1_g4	Picea sitchensis	RWR77588.1low-temperature-induced cysteine proteinase	P:GO:0051603; F:GO:0004197; C:GO:0005615; C:GO:0005764; C:GO:0016020	P:proteolysis involved in cellular protein catabolic process; F:cysteine-type endopeptidase activity; C:extracellular space; C:lysosome; C:membrane	EC:3.4.22	Acting on peptide bonds (peptidases)	211.537	-1.1214	3.62927e-08	1.37577e-06	8.168	14.987	6.744	14.943	14.72	17.269
TRINITY_DN212206_c0_g8	Gossypium raimondii	XP_012446746.1 2-succinylbenzoate--CoA ligase, chloroplastic/peroxisomal	P:GO:0006631; F:GO:0031956	P:fatty acid metabolic process; F:medium-chain fatty acid-CoA ligase activity			265.948	-1.28615	3.72689e-08	1.4096e-06	7.592	12.404	6.131	11.534	18.141	15.991
TRINITY_DN31612_c0_g1	Picea sitchensis	XP_021667910.1outer envelope pore protein 24B, chloroplastic-like	P:GO:0034765; F:GO:0022843	P:regulation of ion transmembrane transport; F:voltage-gated cation channel activity			42.17	-8.44685	3.92178e-08	1.47668e-06	0	17.283	0	16.182	9.507	21.988
TRINITY_DN210377_c0_g1	Amborella trichopoda	XP_020531583.11-acyl-sn-glycerol-3-phosphate acyltransferase isoform X1	P:GO:0006654; F:GO:0003841; C:GO:0005783; C:GO:0016021	P:phosphatidic acid biosynthetic process; F:1-acylglycerol-3-phosphate O-acyltransferase activity; C:endoplasmic reticulum; C:integral component of membrane	EC:2.3.1.51	1-acylglycerol-3-phosphate O-acyltransferase	100.933	-1.59276	4.05243e-08	1.52247e-06	2.517	3.896	2.213	6.414	7.419	7.618
TRINITY_DN97567_c0_g1	Pinus tabuliformis	XP_011623081.1O-acyltransferase WSD1 isoform X1	P:GO:0019432; F:GO:0004144; F:GO:0047196; C:GO:0005886	P:triglyceride biosynthetic process; F:diacylglycerol O-acyltransferase activity; F:long-chain-alcohol O-fatty-acyltransferase activity; C:plasma membrane	EC:2.3.1.20; EC:2.3.1.75	Diacylglycerol O-acyltransferase; Long-chain-alcohol O-fatty-acyltransferase	51.2149	-3.50098	4.16349e-08	1.55724e-06	7.4	14.198	2.318	51.452	41.46	78.437
TRINITY_DN214135_c3_g1	Capsella rubella	XP_006292605.1UPF0481 protein At3g47200	C:GO:0016020; C:GO:0016021	C:membrane; C:integral component of membrane			74.5081	-7.84012	4.17952e-08	1.55977e-06	0.107	21.766	0	13.255	11.347	20.203
TRINITY_DN204078_c2_g1	Picea sitchensis	ABR16356.1unknown					1249.3	-1.15762	4.20723e-08	1.56663e-06	21.966	47.823	33.548	54.269	73.484	60.104
TRINITY_DN202589_c0_g1	Pinus pinaster	AAP85249.1chalcone synthase	P:GO:0009813; F:GO:0016210	P:flavonoid biosynthetic process; F:naringenin-chalcone synthase activity	EC:2.3.1.74	Chalcone synthase	2964.33	-1.23803	4.25507e-08	1.58095e-06	1153.63	1074	817.759	2287.15	2168.76	2191.17
TRINITY_DN205254_c0_g1							68.8262	-7.72392	4.43449e-08	1.64398e-06	0.064	0.192	0	7.291	8.139	9.926
TRINITY_DN199127_c1_g1	Picea sitchensis	XP_011623081.1O-acyltransferase WSD1 isoform X1	P:GO:0045017; F:GO:0008374	P:glycerolipid biosynthetic process; F:O-acyltransferase activity			77.3724	-7.87986	4.5404e-08	1.67587e-06	0	3.907	0.211	17.103	14.402	29.949
TRINITY_DN195987_c0_g2							52.52	-2.53586	4.63027e-08	1.7053e-06	2.357	3.768	2.845	17.487	11.477	16.086
TRINITY_DN201773_c0_g1	Marchantia polymorpha	XP_024524308.1protein PHR1-LIKE 1	F:GO:0003677; C:GO:0005634	F:DNA binding; C:nucleus			171.413	-1.23911	5.34841e-08	1.96548e-06	4.191	6.127	4.407	9.352	9.778	11.942
TRINITY_DN197291_c0_g1							406.885	-1.04701	5.56627e-08	2.03223e-06	14.427	18.927	14.705	28.691	25.253	35.045
TRINITY_DN210536_c3_g3	Picea sitchensis	XP_025620890.1protein ASPARTIC PROTEASE IN GUARD CELL 2-like	P:GO:0006508; F:GO:0004190; C:GO:0016021	P:proteolysis; F:aspartic-type endopeptidase activity; C:integral component of membrane	EC:3.4.23	Acting on peptide bonds (peptidases)	48.9049	-3.00577	5.73484e-08	2.08925e-06	0.448	1.313	0.757	6.085	3.267	5.242
TRINITY_DN199330_c0_g1	Picea sitchensis	XP_010911638.1 bidirectional sugar transporter SWEET1a	P:GO:0034219; P:GO:0051260; F:GO:0051119; C:GO:0005783; C:GO:0005789; C:GO:0005887	P:carbohydrate transmembrane transport; P:protein homooligomerization; F:sugar transmembrane transporter activity; C:endoplasmic reticulum; C:endoplasmic reticulum membrane; C:integral component of plasma membrane			1942.67	-1.02449	5.75098e-08	2.0906e-06	91.724	132.923	91.812	199.743	227.587	157.39
TRINITY_DN204845_c1_g6	Amborella trichopoda	XP_020525563.1ultraviolet-B receptor UVR8 isoform X2	P:GO:0009631; P:GO:0071497; P:GO:1901141; F:GO:0042393; C:GO:0005634	P:cold acclimation; P:cellular response to freezing; P:regulation of lignin biosynthetic process; F:histone binding; C:nucleus			160.642	-1.3515	5.94116e-08	2.15508e-06	3.434	7.889	3.171	7.104	8.516	9.394
TRINITY_DN212346_c3_g10	Picea sitchensis	XP_011100972.1beta-galactosidase 3-like	P:GO:0005975; F:GO:0004565; F:GO:0030246; C:GO:0005618; C:GO:0005773	P:carbohydrate metabolic process; F:beta-galactosidase activity; F:carbohydrate binding; C:cell wall; C:vacuole	EC:3.2.1.23	Beta-galactosidase	651.593	-1.00583	6.24334e-08	2.25548e-06	53.198	68.853	40.56	94.812	85.314	108.627
TRINITY_DN191623_c0_g2							37.1731	-8.26522	6.25816e-08	2.25548e-06	0	0.256	0	8.212	6.369	12.5
TRINITY_DN212427_c0_g2							34.0728	-8.13886	6.327e-08	2.27542e-06	0	7.355	0	7.696	9.448	9.162
TRINITY_DN203798_c1_g2							64.9317	-2.51582	6.57384e-08	2.35413e-06	7.144	12.981	6.227	46.924	26.197	39.412
TRINITY_DN214135_c3_g5	Helianthus annuus	XP_022026196.1UPF0481 protein At3g47200-like	C:GO:0016020; C:GO:0016021	C:membrane; C:integral component of membrane			55.7944	-3.14718	6.72397e-08	2.39769e-06	1.749	9.896	0.68	11.161	6.287	12.937
TRINITY_DN214202_c2_g7	Medicago truncatula	XP_003607794.1beta-glucosidase 40	P:GO:0005975; F:GO:0008422; F:GO:0102483	P:carbohydrate metabolic process; F:beta-glucosidase activity; F:scopolin beta-glucosidase activity	EC:3.2.1.21	Beta-glucosidase	208.593	-1.29869	6.88359e-08	2.43911e-06	11.836	20.581	12.798	32.331	24.675	32.214
TRINITY_DN212473_c4_g2	Pinus contorta	AFU73861.1alpha terpineol /1,8-cineole synthase	P:GO:0043693; P:GO:0071395; F:GO:0000287; F:GO:0010333; C:GO:0009507	P:monoterpene biosynthetic process; P:cellular response to jasmonic acid stimulus; F:magnesium ion binding; F:terpene synthase activity; C:chloroplast			31.218	-4.98814	7.23808e-08	2.53716e-06	0.416	24.413	0.22	7.784	8.705	8.708
TRINITY_DN188697_c0_g1							58.4107	-2.18547	7.25074e-08	2.53716e-06	4.233	29.836	6.754	22.552	24.192	19.895
TRINITY_DN193685_c0_g1	Pinus pinaster	XP_021650643.1dof zinc finger protein DOF5.6	P:GO:0006355; F:GO:0003677; C:GO:0005634; C:GO:0016021	P:regulation of transcription, DNA-templated; F:DNA binding; C:nucleus; C:integral component of membrane			269.979	-1.02864	8.14577e-08	2.81522e-06	7.443	9.575	8.698	16.61	15.629	18.857
TRINITY_DN167631_c0_g1							220.223	-1.41698	8.28861e-08	2.85872e-06	18.106	17.624	18.335	43.887	40.917	62.755
TRINITY_DN215105_c7_g2	Picea sitchensis	RWR83834.1omega-hydroxypalmitate O-feruloyl transferase	F:GO:0016747; C:GO:0005622; C:GO:0110165	F:transferase activity, transferring acyl groups other than amino-acyl groups; C:intracellular; C:cellular anatomical entity			1017.97	-1.02699	8.73909e-08	2.98959e-06	86.841	129.924	99.887	185.973	156.404	235.372
TRINITY_DN199428_c0_g1	Pinus tabuliformis	AGC13117.1tau class glutathione S-transferase	F:GO:0004364	F:glutathione transferase activity	EC:2.5.1.18	Glutathione transferase	375.045	-1.76844	9.53819e-08	3.24475e-06	38.035	43.863	49.901	132.471	196.59	95.184
TRINITY_DN213534_c0_g5	Picea sitchensis	XP_012065419.1protein PIN-LIKES 7 isoform X1	P:GO:0055085; C:GO:0016021	P:transmembrane transport; C:integral component of membrane			544.584	-1.6577	9.54281e-08	3.24475e-06	34.964	42.731	19.907	101.237	64.107	102.544
TRINITY_DN208651_c0_g3	Picea sitchensis	PSR96689.1Protein tincar like					77.0094	-1.87455	9.68251e-08	3.28561e-06	3.871	8.753	2.96	14.943	11.736	12.011
TRINITY_DN209415_c4_g2	Picea sitchensis	POO00571.1Acid phosphatase	F:GO:0016787	F:hydrolase activity			3309.71	-1.25021	1.09938e-07	3.70073e-06	259.68	153.504	142.479	477.524	467.56	518.246
TRINITY_DN214440_c3_g8	Picea sitchensis	XP_017220994.1 GDSL esterase/lipase At5g45910-like	F:GO:0016787	F:hydrolase activity			38.7768	-3.63085	1.10358e-07	3.70747e-06	0.469	3.939	0.872	6.622	6.31	11.822
TRINITY_DN205362_c0_g3	Picea sitchensis	XP_018859033.1 NDR1/HIN1-Like protein 3-like	C:GO:0031224	C:intrinsic component of membrane			61.399	-2.31532	1.55697e-07	5.15855e-06	2.858	5.263	1.475	10.163	9.943	13.872
TRINITY_DN173810_c0_g1							189.353	-2.29548	1.67662e-07	5.49593e-06	36.82	62.138	14.197	127.713	102.24	146.915
TRINITY_DN195090_c0_g2	Picea sitchensis	DAA00289.1TPA_exp: putative phytosulfokine peptide precursor	P:GO:0007165; P:GO:0008283; F:GO:0008083; C:GO:0005576; C:GO:0016020; C:GO:0016021	P:signal transduction; P:cell population proliferation; F:growth factor activity; C:extracellular region; C:membrane; C:integral component of membrane			102.223	-9.7238	1.91927e-07	6.16475e-06	0	5.263	0	21.795	5.732	36.315
TRINITY_DN204814_c0_g1	Picea sitchensis	ABK23044.1unknown	F:GO:0005509; C:GO:0016020; C:GO:0016021	F:calcium ion binding; C:membrane; C:integral component of membrane			123.614	-1.60527	2.15563e-07	6.88453e-06	7.933	9.703	7.367	20.6	19.309	29.898
TRINITY_DN207960_c0_g2	Medicago truncatula	XP_003626620.2endoribonuclease Dicer homolog 1	P:GO:0006396; P:GO:0031047; F:GO:0016891; F:GO:0097159; F:GO:1901363; C:GO:0005622; C:GO:0110165	P:RNA processing; P:gene silencing by RNA; F:endoribonuclease activity, producing 5'-phosphomonoesters; F:organic cyclic compound binding; F:heterocyclic compound binding; C:intracellular; C:cellular anatomical entity	EC:3.1.30; EC:3.1.26	Acting on ester bonds; Acting on ester bonds	369.751	-1.19272	2.23022e-07	7.10925e-06	24.365	44.098	25.635	51.967	43.949	64.625
TRINITY_DN194756_c0_g1	Phoenix dactylifera	XP_008790445.1leucine-rich repeat receptor-like serine/threonine-protein kinase BAM1	P:GO:0006468; P:GO:0009755; P:GO:0016310; F:GO:0004672; F:GO:0005524; F:GO:0016301; C:GO:0005886; C:GO:0016020; C:GO:0016021	P:protein phosphorylation; P:hormone-mediated signaling pathway; P:phosphorylation; F:protein kinase activity; F:ATP binding; F:kinase activity; C:plasma membrane; C:membrane; C:integral component of membrane			36.357	-3.84526	2.3258e-07	7.34438e-06	1.312	3.064	0	12.389	9.165	10.561
TRINITY_DN201223_c0_g3	Pinus taeda	ACJ67021.11-deoxy-D-xylulose 5-phosphate synthase type I	P:GO:0015995; P:GO:0016114; F:GO:0008661; C:GO:0009507; C:GO:0016021	P:chlorophyll biosynthetic process; P:terpenoid biosynthetic process; F:1-deoxy-D-xylulose-5-phosphate synthase activity; C:chloroplast; C:integral component of membrane	EC:2.2.1.7	1-deoxy-D-xylulose-5-phosphate synthase	1003.3	-1.1974	2.38366e-07	7.47103e-06	54.275	73.528	33.27	105.479	88.346	122.679
TRINITY_DN206056_c0_g1	Picea sitchensis	ADE77499.1unknown					111.331	-1.60581	2.51921e-07	7.86097e-06	3.903	10.098	6.409	15.36	17.421	16.068
TRINITY_DN201397_c0_g1	Picea sitchensis	XP_012851691.1 putative methylesterase 11, chloroplastic	P:GO:0009694; P:GO:0009696; F:GO:0016746; F:GO:0080030; F:GO:0080031; F:GO:0080032	P:jasmonic acid metabolic process; P:salicylic acid metabolic process; F:transferase activity, transferring acyl groups; F:methyl indole-3-acetate esterase activity; F:methyl salicylate esterase activity; F:methyl jasmonate esterase activity	EC:3.1.1.1	Carboxylesterase	35.2196	-2.81029	2.52209e-07	7.86097e-06	1.823	8.422	2.701	16.336	13.175	15.416
TRINITY_DN211449_c0_g1	Picea sitchensis	PSR91410.1Lecithin retinol acyltransferase	F:GO:0016740; F:GO:0016746	F:transferase activity; F:transferase activity, transferring acyl groups			75.9285	-1.60336	2.60438e-07	8.05778e-06	4.521	5.22	4.033	14.34	13.47	14.138
TRINITY_DN204090_c0_g1	Durio zibethinus	XP_022728228.1LOB domain-containing protein 29-like	P:GO:0009755; P:GO:0045893; C:GO:0005634	P:hormone-mediated signaling pathway; P:positive regulation of transcription, DNA-templated; C:nucleus			29.7109	-3.39668	2.94346e-07	9.02393e-06	0.277	0.544	0.68	4.923	4.565	4.984
TRINITY_DN215504_c5_g1	Lotus japonicus	XP_018841148.1 12-oxophytodienoate reductase 2-like	P:GO:0055114; F:GO:0010181; F:GO:0016629	P:oxidation-reduction process; F:FMN binding; F:12-oxophytodienoate reductase activity	EC:1.3.1.42	12-oxophytodienoate reductase	148.855	-1.5963	2.95902e-07	9.05514e-06	23.971	25.63	12.789	56.637	48.443	62.3
TRINITY_DN204067_c0_g1	Pinus pinaster	CAP09644.1chalcone synthase	P:GO:0006633; P:GO:0009813; F:GO:0004315; F:GO:0016210	P:fatty acid biosynthetic process; P:flavonoid biosynthetic process; F:3-oxoacyl-[acyl-carrier-protein] synthase activity; F:naringenin-chalcone synthase activity	EC:2.3.1.41; EC:2.3.1.74; EC:2.3.1.85	Beta-ketoacyl-[acyl-carrier-protein] synthase I; Chalcone synthase; Fatty-acid synthase system	109.886	-1.66686	3.08835e-07	9.43376e-06	13.574	19.065	16.64	50.377	35.786	54.854
TRINITY_DN174113_c0_g2	Picea sitchensis	XP_022991657.1cytochrome P450 86B1-like	P:GO:0055114; F:GO:0004497; F:GO:0005506; F:GO:0016705; F:GO:0020037; C:GO:0016021	P:oxidation-reduction process; F:monooxygenase activity; F:iron ion binding; F:oxidoreductase activity, acting on paired donors, with incorporation or reduction of molecular oxygen; F:heme binding; C:integral component of membrane			115.273	-1.9867	3.4908e-07	1.05482e-05	5.012	9.981	4.416	20.853	12.302	24.201
TRINITY_DN212485_c1_g4	Pinus taeda	XP_006467552.1membrane protein PM19L	C:GO:0016021	C:integral component of membrane			72.4701	-3.68819	3.65021e-07	1.09905e-05	3.945	4.27	1.035	32.54	14.992	46.078
TRINITY_DN211850_c2_g4	Picea sitchensis	ADM76083.1auxin efflux carrier-like protein	P:GO:0055085; C:GO:0016021	P:transmembrane transport; C:integral component of membrane			238.637	-1.60322	3.66929e-07	1.10282e-05	44.86	51.154	24.035	103.605	92.427	127.981
TRINITY_DN201923_c1_g2	Dendrobium catenatum	PKU75009.1LOB domain-containing protein 41	P:GO:0010468; C:GO:0016020; C:GO:0016021	P:regulation of gene expression; C:membrane; C:integral component of membrane			115.62	-1.88822	3.86852e-07	1.15445e-05	3.231	9.853	5.527	16.259	12.668	20.143
TRINITY_DN201446_c0_g1							331.895	-1.27484	3.91364e-07	1.16585e-05	13.851	19.727	18.106	32.978	35.48	49.278
TRINITY_DN214796_c4_g6	Acinetobacter baumannii	WP_071414642.1hypothetical protein					233.79	-2.34685	4.74439e-07	1.39359e-05	34.634	40.906	18.039	154.113	73.354	172.171
TRINITY_DN201223_c0_g2	Pinus taeda	ACJ67021.11-deoxy-D-xylulose 5-phosphate synthase type I	P:GO:0015995; P:GO:0016114; F:GO:0008661; C:GO:0009507	P:chlorophyll biosynthetic process; P:terpenoid biosynthetic process; F:1-deoxy-D-xylulose-5-phosphate synthase activity; C:chloroplast	EC:2.2.1.7	1-deoxy-D-xylulose-5-phosphate synthase	1468.85	-1.0049	5.42394e-07	1.57397e-05	38.611	48.816	25.654	67.359	57.973	74.277
TRINITY_DN203237_c1_g3	Prunus yedoensis var. nudiflora	PQQ07532.1polyketide synthase 5-like	P:GO:0009058; F:GO:0016747	P:biosynthetic process; F:transferase activity, transferring acyl groups other than amino-acyl groups			1450.13	-1.21393	5.70766e-07	1.64496e-05	591.08	532.664	442.974	1201.09	963.439	1210.72
TRINITY_DN212308_c0_g2	Physcomitrella patens	RWR82096.1AP2/ERF and B3 domain-containing protein	P:GO:0006355; F:GO:0003677; F:GO:0003700; C:GO:0005634	P:regulation of transcription, DNA-templated; F:DNA binding; F:DNA-binding transcription factor activity; C:nucleus			83.0682	-1.61969	5.78502e-07	1.66156e-05	2.719	3.661	3.19	7.598	9.212	10.483
TRINITY_DN195381_c0_g4							23.7	-7.61566	5.80819e-07	1.66538e-05	0	25.876	0	18.473	19.344	23.721
TRINITY_DN206596_c3_g2	Glycine max	ACU13548.1unknown	C:GO:0016020; C:GO:0016021	C:membrane; C:integral component of membrane			4373.43	-1.11415	5.90676e-07	1.69076e-05	1187.54	1732.42	915.357	2405.47	1760.26	2485.93
TRINITY_DN207871_c1_g3	Pinus taeda	RWR84549.1SET domain-containing protein	P:GO:0006412; F:GO:0003723; F:GO:0003735; C:GO:0005762; C:GO:0015934	P:translation; F:RNA binding; F:structural constituent of ribosome; C:mitochondrial large ribosomal subunit; C:large ribosomal subunit			59.539	-1.80937	6.25293e-07	1.78378e-05	11.751	24.029	10.011	36.388	38.11	37.327
TRINITY_DN213890_c0_g7							116.291	-3.19942	6.53706e-07	1.85228e-05	11.026	18.318	1.418	48.415	56.227	75.229
TRINITY_DN206248_c0_g6	Medicago truncatula	XP_003611874.1BEL1-like homeodomain protein 2	P:GO:0006357; F:GO:0000978; C:GO:0005634	P:regulation of transcription by RNA polymerase II; F:RNA polymerase II proximal promoter sequence-specific DNA binding; C:nucleus			79.4072	-1.61084	6.77959e-07	1.91777e-05	1.386	3.565	1.035	4.276	4.364	4.667
TRINITY_DN198211_c0_g1							287.121	-1.82271	6.86013e-07	1.93405e-05	37.833	6.533	15.452	78.389	103.432	74.706
TRINITY_DN45509_c1_g1	Amborella trichopoda	XP_006849171.3aldehyde oxidase GLOX	C:GO:0016020; C:GO:0016021	C:membrane; C:integral component of membrane			38.0393	-4.61264	7.89459e-07	2.1999e-05	0.267	1.975	0	3.651	1.899	5.525
TRINITY_DN211040_c8_g2							32.4133	-3.57948	8.35287e-07	2.3161e-05	0.746	4.153	0.326	10.426	4.529	7.223
TRINITY_DN207373_c0_g1							28.8409	-4.42395	9.37895e-07	2.58359e-05	0.544	3.533	0.872	19.186	9.118	14.747
TRINITY_DN212785_c0_g1							87.382	-2.63394	9.55819e-07	2.62866e-05	0.96	0.843	2.28	9.297	5.791	11.247
TRINITY_DN210288_c0_g1	Pinus taeda	AZA14755.1ASYMMETRIC LEAVES 2-like protein 37	P:GO:0010468	P:regulation of gene expression			411.826	-1.65152	1.03673e-06	2.83266e-05	8.424	7.472	7.903	39.567	22.139	20.572
TRINITY_DN213566_c1_g3	Picea sitchensis	ABK23716.1unknown					74.5854	-1.77103	1.04797e-06	2.85747e-05	9.042	22.129	7.549	28.077	24.557	40.553
TRINITY_DN204244_c0_g4	Nelumbo nucifera	XP_010265338.1 phosphate transporter PHO1 homolog 1-like	P:GO:0016036; P:GO:0035435; F:GO:0000822; F:GO:0015114; C:GO:0005794; C:GO:0005886; C:GO:0016021	P:cellular response to phosphate starvation; P:phosphate ion transmembrane transport; F:inositol hexakisphosphate binding; F:phosphate ion transmembrane transporter activity; C:Golgi apparatus; C:plasma membrane; C:integral component of membrane			139.488	-1.16191	1.0887e-06	2.94597e-05	5.961	4.569	4.886	11.106	11.996	13.134
TRINITY_DN207869_c0_g2	Picea sitchensis	XP_010930069.1 protein DETOXIFICATION 40 isoform X1	P:GO:0042908; P:GO:0055085; F:GO:0015297; F:GO:0042910; C:GO:0005773; C:GO:0016021	P:xenobiotic transport; P:transmembrane transport; F:antiporter activity; F:xenobiotic transmembrane transporter activity; C:vacuole; C:integral component of membrane			101.46	-1.60442	1.13493e-06	3.06121e-05	3.146	5.989	3.324	10.152	7.714	12.105
TRINITY_DN197739_c0_g3	Picea sitchensis	PSR96432.1E3 ubiquitin-protein like	C:GO:0016021	C:integral component of membrane			94.6849	-1.41124	1.20784e-06	3.24228e-05	5.758	18.702	4.186	13.551	12.986	14.481
TRINITY_DN213855_c1_g1	Asparagus officinalis	XP_020276986.1 oligopeptide transporter 7-like	P:GO:0055085; F:GO:0035673; C:GO:0005887	P:transmembrane transport; F:oligopeptide transmembrane transporter activity; C:integral component of plasma membrane			197.079	-1.38036	1.22189e-06	3.27479e-05	5.46	8.433	5.729	13.715	11.335	17.87
TRINITY_DN215414_c6_g5							62.8389	-1.67919	1.22431e-06	3.27604e-05	10.589	28.47	7.865	24.251	31.057	24.665
TRINITY_DN207861_c0_g3	Cinnamomum micranthum f. kanehirae	RWR90505.1protein indeterminate-domain-containing protein	C:GO:0110165	C:cellular anatomical entity			176.574	-1.21388	1.25953e-06	3.35168e-05	3.359	4.772	4.866	9.494	9.318	10.449
TRINITY_DN206826_c1_g3	Picea sitchensis	ABK21926.1unknown					78.1475	-1.72623	1.35584e-06	3.59373e-05	10.844	18.638	6.83	26.981	29.193	33.844
TRINITY_DN210163_c0_g1	Picea sitchensis	XP_020260743.1auxin-responsive protein SAUR50-like	P:GO:0009733	P:response to auxin			153.265	-2.17459	1.40483e-06	3.71771e-05	6.302	27.274	8.181	18.616	48.183	40.51
TRINITY_DN215331_c2_g1	Populus trichocarpa	AXY97575.1NB-ARC domain-containing disease resistance protein	F:GO:0043531	F:ADP binding			93.9622	-1.47433	1.46235e-06	3.85178e-05	8.754	20.453	8.449	21.675	25.501	27.959
TRINITY_DN213812_c0_g1	Aquilegia coerulea	PSS00188.1GDSL esterase/lipase	F:GO:0016788; C:GO:0016020; C:GO:0016021	F:hydrolase activity, acting on ester bonds; C:membrane; C:integral component of membrane			212.853	-1.57678	1.47345e-06	3.87246e-05	7.272	6.053	11.505	21.225	34.171	24.776
TRINITY_DN180107_c0_g1	Picea abies	AHB89627.1leucoanthocyanidin reductase 1	P:GO:0055114; F:GO:0033788	P:oxidation-reduction process; F:leucoanthocyanidin reductase activity	EC:1.17.1; EC:1.17.1.3	Acting on CH or CH(2) groups; Leucoanthocyanidin reductase	150.05	-1.34515	1.88231e-06	4.85906e-05	7.496	7.526	4.713	16.39	14.26	17.544
TRINITY_DN203492_c2_g2	Spinacia oleracea	XP_021865667.1protease Do-like 7	P:GO:0006508; F:GO:0004252	P:proteolysis; F:serine-type endopeptidase activity	EC:3.4.21	Acting on peptide bonds (peptidases)	138.43	-1.35277	1.90296e-06	4.90487e-05	15.515	23.634	15.241	37.32	32.401	48.488
TRINITY_DN201107_c0_g1	Picea sitchensis	ABR17909.1unknown	P:GO:0045490; F:GO:0030570; F:GO:0046872	P:pectin catabolic process; F:pectate lyase activity; F:metal ion binding	EC:4.2.2.2	Pectate lyase	84.6131	-1.53904	1.9084e-06	4.91135e-05	10.333	11.251	10.183	23.1	31.635	32.9
TRINITY_DN203422_c0_g1	Pinus taeda	XP_011621596.1PRA1 family protein F3	C:GO:0005737; C:GO:0012505; C:GO:0016021; C:GO:0043231	C:cytoplasm; C:endomembrane system; C:integral component of membrane; C:intracellular membrane-bounded organelle			97.8619	-1.99908	1.97268e-06	5.06904e-05	6.078	8.604	3.286	19.175	14.024	24.913
TRINITY_DN212316_c1_g2	Pinus pseudostrobus	AFJ73572.12-methyl-3-buten-2-ol synthase	F:GO:0000287; F:GO:0010333	F:magnesium ion binding; F:terpene synthase activity			583.37	-1.39494	1.99159e-06	5.10204e-05	21.742	27.947	12.77	49.259	36.246	49.072
TRINITY_DN205836_c0_g1							66.1072	-3.41424	2.32709e-06	5.9165e-05	0.096	5.412	1.983	4.056	2.489	4.367
TRINITY_DN215068_c0_g1	Pinus radiata	XP_004494612.1probable linoleate 9S-lipoxygenase 5	P:GO:0044255; P:GO:0055114; F:GO:0016702; F:GO:0046872	P:cellular lipid metabolic process; P:oxidation-reduction process; F:oxidoreductase activity, acting on single donors with incorporation of molecular oxygen, incorporation of two atoms of oxygen; F:metal ion binding	EC:1.13.11	Acting on single donors with incorporation of molecular oxygen (oxygenases). The oxygen incorporated need not be derived from O(2)	110.524	-1.26478	2.35759e-06	5.98501e-05	10.525	9.319	9.101	22.968	22.069	27.161
TRINITY_DN170855_c0_g1							25.2915	-7.70985	2.45431e-06	6.20248e-05	0	2.039	0	4.429	2.442	9.428
TRINITY_DN213890_c1_g1							26.5936	-4.38807	2.77899e-06	6.89871e-05	1.429	10.771	0	17.574	12.078	23.077
TRINITY_DN201424_c17_g1	Populus euphratica	XP_011048849.1 purple acid phosphatase 2-like isoform X1	P:GO:0016311; F:GO:0003993; F:GO:0046872	P:dephosphorylation; F:acid phosphatase activity; F:metal ion binding	EC:3.1.3.2	Acid phosphatase	201.522	-1.10963	2.90821e-06	7.17714e-05	8.189	18.008	9.292	15.283	14.874	18.951
TRINITY_DN200698_c0_g2							19.1507	-7.30761	2.98329e-06	7.33344e-05	0	7.654	0	6.26	3.822	6.597
TRINITY_DN212648_c0_g1	Pinus tabuliformis	AGY80773.1flavonol synthase	P:GO:0055114; F:GO:0016491; F:GO:0046872	P:oxidation-reduction process; F:oxidoreductase activity; F:metal ion binding			1961.05	-2.96705	3.3105e-06	8.0987e-05	47.43	96.405	13.373	247.007	186.045	281.785
TRINITY_DN210787_c0_g1	Picea sitchensis	XP_016676863.1 3-oxo-5-alpha-steroid 4-dehydrogenase 2-like	P:GO:0006629; P:GO:0055114; F:GO:0016627; C:GO:0016021	P:lipid metabolic process; P:oxidation-reduction process; F:oxidoreductase activity, acting on the CH-CH group of donors; C:integral component of membrane			150.388	-1.14947	3.33129e-06	8.12823e-05	4.073	5.081	4.129	9.67	9.401	7.627
TRINITY_DN203879_c0_g2	Picea sitchensis	XP_026391678.1probable strigolactone esterase DAD2	P:GO:0010223; P:GO:1901601	P:secondary shoot formation; P:strigolactone biosynthetic process			36.2798	-3.65607	3.33983e-06	8.12823e-05	0.597	2.007	0.105	5.701	2.63	6.357
TRINITY_DN194495_c0_g1							150.076	-1.14107	3.34189e-06	8.12823e-05	12.902	11.55	11.065	23.988	25.572	30.524
TRINITY_DN213793_c1_g1	Picea sitchensis	XP_012468607.1 probable pectate lyase 18 isoform X1	P:GO:0045490; P:GO:0090378; F:GO:0030570; C:GO:0009530	P:pectin catabolic process; P:seed trichome elongation; F:pectate lyase activity; C:primary cell wall	EC:4.2.2.2	Pectate lyase	209.04	-1.14914	3.50447e-06	8.47467e-05	22.755	28.256	24.907	45.871	47.841	66.461
TRINITY_DN213432_c1_g3	Citrus sinensis	EEF28943.1 glycosyltransferase, putative	F:GO:0016757; C:GO:0016020	F:transferase activity, transferring glycosyl groups; C:membrane			133.592	-1.05395	3.84107e-06	9.19864e-05	5.076	9.17	4.455	9.242	9.743	8.502
TRINITY_DN212460_c2_g1							26.2615	-7.7633	4.04059e-06	9.59198e-05	0	5.7	0	1.765	9.259	3.689
TRINITY_DN188864_c0_g1	Pinus massoniana	AGU43679.1pinocembrin chalcone synthase	P:GO:0009813; F:GO:0016210	P:flavonoid biosynthetic process; F:naringenin-chalcone synthase activity	EC:2.3.1.74	Chalcone synthase	725.803	-1.49955	4.08062e-06	9.67337e-05	366.098	326.042	220.792	838.694	657.733	839.314
TRINITY_DN193044_c0_g1							58.3086	-2.06773	4.12826e-06	9.75882e-05	4.361	6.095	1.983	12.476	13.01	16.24
TRINITY_DN292414_c0_g1	Picea sitchensis	XP_010655545.1 protein STICHEL-like 3 isoform X1	P:GO:0006260; P:GO:0006261; P:GO:0006281; P:GO:0071897; F:GO:0003677; F:GO:0003689; F:GO:0003887; F:GO:0005524; C:GO:0005634; C:GO:0005663; C:GO:0009360	P:DNA replication; P:DNA-dependent DNA replication; P:DNA repair; P:DNA biosynthetic process; F:DNA binding; F:DNA clamp loader activity; F:DNA-directed DNA polymerase activity; F:ATP binding; C:nucleus; C:DNA replication factor C complex; C:DNA polymerase III complex			130.042	-1.26488	4.45872e-06	0.000104958	3.913	7.067	5.537	10.985	10.71	12.946
TRINITY_DN195319_c0_g1	Malus domestica	RXH85966.1hypothetical protein DVH24_017019	F:GO:0003723; C:GO:0016020; C:GO:0016021	F:RNA binding; C:membrane; C:integral component of membrane			83.187	-1.59072	4.59715e-06	0.000107764	6.313	9.351	9.369	17.509	26.091	23.515
TRINITY_DN200951_c0_g2	Picea sitchensis	XP_008784965.1peroxidase 72-like	P:GO:0006979; P:GO:0042744; P:GO:0048658; P:GO:0055114; P:GO:0098869; F:GO:0004601; F:GO:0020037; F:GO:0046872; C:GO:0005576	P:response to oxidative stress; P:hydrogen peroxide catabolic process; P:anther wall tapetum development; P:oxidation-reduction process; P:cellular oxidant detoxification; F:peroxidase activity; F:heme binding; F:metal ion binding; C:extracellular region	EC:1.11.1.7	Peroxidase	55.3341	-2.13936	5.25104e-06	0.000121568	3.945	11.977	3.688	19.91	19.78	11.787
TRINITY_DN203716_c2_g1	Pinus pinaster	CAC84679.1putative histone H4	F:GO:0003677; F:GO:0046982; C:GO:0000786; C:GO:0005634	F:DNA binding; F:protein heterodimerization activity; C:nucleosome; C:nucleus			56.7913	-1.99905	5.4699e-06	0.000125942	1.973	9.778	2.376	10.558	8.044	15.811
TRINITY_DN203040_c0_g1	Elaeis guineensis	XP_010935532.1 probable acyl-activating enzyme 5, peroxisomal isoform X1	F:GO:0003824; F:GO:0016874	F:catalytic activity; F:ligase activity			130.12	-1.1495	5.49045e-06	0.000126243	5.662	8.817	4.502	12.63	10.71	11.607
TRINITY_DN205917_c1_g3	Picea sitchensis	ABK25605.1unknown	C:GO:0016021	C:integral component of membrane			216.836	-1.93906	5.64128e-06	0.000129534	8.381	12.458	10.116	38.679	18.99	51.791
TRINITY_DN208008_c1_g7							17.3692	-7.16803	5.8441e-06	0.000133826	0	17.144	0	7.356	12.609	14.473
TRINITY_DN208274_c1_g4	Ginkgo biloba	PKU76346.1Myb-related protein Myb4	P:GO:0070925; F:GO:0003676; C:GO:0036464	P:organelle assembly; F:nucleic acid binding; C:cytoplasmic ribonucleoprotein granule			123.681	-1.58732	6.12002e-06	0.000139764	5.566	7.344	3.726	13.288	12.479	17.87
TRINITY_DN198903_c0_g1	Picea sitchensis	ABY61019.1mini zinc finger 1	F:GO:0003677	F:DNA binding			284.263	-1.20266	6.59935e-06	0.000149293	22.35	28.288	13.891	37.528	48.301	42.449
TRINITY_DN215426_c3_g3							20.2921	-7.39094	6.65135e-06	0.000150066	0	0.48	0	2.258	6.039	2.445
TRINITY_DN146517_c0_g1	Pinus taeda	AFG56179.1hypothetical protein 0_17802_01, partial					87.401	-1.35266	6.76181e-06	0.000152348	10.525	14.646	7.951	23.539	24.015	24.055
TRINITY_DN214645_c2_g1	Pinus tabuliformis	AJP06331.1NB-ARC	P:GO:0007165; F:GO:0043531	P:signal transduction; F:ADP binding			71.5585	-1.97761	6.98167e-06	0.000156054	8.232	16.92	4.924	7.159	8.009	12.345
TRINITY_DN199795_c0_g1							18.3826	-7.25008	7.34242e-06	0.000162606	0	0.459	0	3.771	3.668	8.622
TRINITY_DN213812_c0_g3	Physcomitrella patens	XP_024394142.1GDSL esterase/lipase At5g37690-like	F:GO:0016788; C:GO:0016020; C:GO:0016021	F:hydrolase activity, acting on ester bonds; C:membrane; C:integral component of membrane			81.7681	-1.65028	7.4107e-06	0.000163902	5.193	5.188	9.656	22.64	24.841	20.735
TRINITY_DN190987_c0_g1	Picea sitchensis	XP_024358228.1cyclin-dependent protein kinase inhibitor SMR9-like	P:GO:0032875	P:regulation of DNA endoreduplication			22.0459	-4.02172	7.68875e-06	0.000169829	0.256	0.555	0.364	5.098	3.09	3.414
TRINITY_DN167701_c0_g2	Brassica oleracea/Brassica napus	CDY18953.1 BnaC04g03970D	P:GO:0000079; F:GO:0019901	P:regulation of cyclin-dependent protein serine/threonine kinase activity; F:protein kinase binding			16.3232	-7.07787	7.80166e-06	0.000172097	0	7.035	0	3.519	2.56	4.804
TRINITY_DN206434_c0_g4							32.6349	-2.74287	7.89758e-06	0.000173901	2.09	23.986	10.423	34.359	32.165	33.672
TRINITY_DN211189_c0_g1	Picea sitchensis	CAC84485.1putative acid phosphatase	P:GO:0016311; F:GO:0003993	P:dephosphorylation; F:acid phosphatase activity	EC:3.1.3.2	Acid phosphatase	211.298	-1.69722	7.90413e-06	0.000173901	14.768	10.91	6.735	26.586	39.573	43.435
TRINITY_DN195263_c0_g1							16.8822	-7.12627	7.98772e-06	0.000175511	0	0	0	3.037	1.805	3.929
TRINITY_DN208835_c1_g2	Picea sitchensis	AJP06317.1Lipase 2	P:GO:0006629; C:GO:0016021	P:lipid metabolic process; C:integral component of membrane			17.5204	-7.1805	8.42473e-06	0.000183674	0	10.312	0	8.431	6.452	15.528
TRINITY_DN212119_c1_g5	Quercus suber	PRQ26813.1putative Galactose-binding domain-containing protein	P:GO:0022900; F:GO:0009055; F:GO:0020037; F:GO:0046872; C:GO:0009505; C:GO:0016021	P:electron transport chain; F:electron transfer activity; F:heme binding; F:metal ion binding; C:plant-type cell wall; C:integral component of membrane			35.0865	-5.09761	8.71883e-06	0.000189106	0.363	2.167	1.207	75.988	13.671	34.719
TRINITY_DN210832_c1_g1	Picea sitchensis	XP_010932002.1 NDR1/HIN1-Like protein 3-like	C:GO:0016020	C:membrane			40.9008	-2.09739	9.24325e-06	0.000199197	1.599	3.555	1.255	5.986	5.249	7.687
TRINITY_DN202115_c0_g1	Elaeis guineensis	XP_010933990.1 BTB/POZ domain-containing protein At1g63850-like					171.498	-1.19843	9.47476e-06	0.000203146	5.865	6.864	5.192	11.424	11.217	16.42
TRINITY_DN209636_c0_g1	Acinetobacter baumannii	WP_071414443.1hypothetical protein					157.872	-1.04536	9.58698e-06	0.00020503	5.598	9.17	6.897	14.494	11.831	13.701
TRINITY_DN213817_c0_g1	Picea sitchensis	ADE76042.1unknown					282.828	-1.29296	9.70955e-06	0.000207388	5.95	13.557	8.468	13.551	20.689	18.676
TRINITY_DN203420_c0_g1	Aquilegia coerulea	XP_010673182.1 calmodulin-binding protein 25	P:GO:0006970; F:GO:0005516; C:GO:0005634	P:response to osmotic stress; F:calmodulin binding; C:nucleus			30.9564	-2.64374	9.78253e-06	0.000208417	0.629	3.341	0.508	4.199	4.117	2.72
TRINITY_DN197842_c0_g2							50.2299	-2.3576	9.93566e-06	0.000210879	2.453	2.658	4.522	16.215	11.713	23.798
TRINITY_DN211363_c1_g1	Ananas comosus	OAY78687.1Protein STICHEL-like 3	P:GO:0006261; P:GO:0006281; P:GO:0071897; F:GO:0003689; F:GO:0003887; F:GO:0005524; C:GO:0005634; C:GO:0005663; C:GO:0009360	P:DNA-dependent DNA replication; P:DNA repair; P:DNA biosynthetic process; F:DNA clamp loader activity; F:DNA-directed DNA polymerase activity; F:ATP binding; C:nucleus; C:DNA replication factor C complex; C:DNA polymerase III complex	EC:3.6.1.3; EC:2.7.7.7; EC:3.6.1.15	Adenosinetriphosphatase; DNA-directed DNA polymerase; Nucleoside-triphosphate phosphatase	215.957	-1.18982	1.01935e-05	0.000214997	3.764	5.754	6.6	9.571	9.601	11.033
TRINITY_DN202558_c0_g1							54.4427	-1.79341	1.02295e-05	0.000215485	6.91	13.055	7.281	19.318	15.64	22.76
TRINITY_DN202740_c1_g4	Picea sitchensis	OVA08074.1NADH:flavin oxidoreductase/NADH oxidase	P:GO:0055114; F:GO:0010181; F:GO:0016491	P:oxidation-reduction process; F:FMN binding; F:oxidoreductase activity			54.5851	-1.71672	1.06111e-05	0.000223244	12.103	11.625	8.334	33.658	33.51	33.998
TRINITY_DN213836_c0_g1	Pinus tabuliformis	RWR96235.1O-acyltransferase WSD1 isoform X1	F:GO:0016740	F:transferase activity			52.8064	-1.97571	1.12862e-05	0.000235973	3.689	10.568	9.158	21.73	25.112	23.584
TRINITY_DN208533_c2_g5	Picea sitchensis	XP_017977497.1 probable disease resistance protein At4g27220 isoform X1	F:GO:0043531	F:ADP binding			45.5645	-2.25287	1.16143e-05	0.000242231	3.124	10.76	1.657	9.549	9.684	15.056
TRINITY_DN190812_c0_g1	Picea sitchensis	ABK23612.1unknown	P:GO:0030001; F:GO:0046872	P:metal ion transport; F:metal ion binding			14.8337	-6.94016	1.27161e-05	0.000263717	0	1.003	0	1.732	1.533	2.659
TRINITY_DN207516_c1_g7							99.1359	-1.20735	1.28558e-05	0.000265819	2.911	8.7	3.621	7.181	10.368	7.369
TRINITY_DN208693_c2_g2	Picea sitchensis	XP_009403789.1 transcription factor ICE1-like isoform X2	F:GO:0046983	F:protein dimerization activity			38.1187	-2.28487	1.29004e-05	0.000266086	5.076	9.938	3.343	23.714	18.955	27.324
TRINITY_DN213890_c0_g8							894.346	-1.2472	1.29599e-05	0.000266909	139.965	258.438	80.067	274.821	210.414	304.176
TRINITY_DN200856_c1_g1	Picea sitchensis	OAY71185.1Galactinol synthase 1	F:GO:0016757	F:transferase activity, transferring glycosyl groups			25.3854	-5.26392	1.35665e-05	0.00027711	0.288	1.43	0.46	14.702	6.617	19.363
TRINITY_DN199889_c0_g1							27.9208	-5.46916	1.37923e-05	0.000281379	0.256	1.964	0	3.662	5.19	11.848
TRINITY_DN208733_c2_g1	Picea sitchensis	CAC84679.1putative histone H4	P:GO:0006334; F:GO:0003677; F:GO:0046982; C:GO:0000786; C:GO:0005634; C:GO:0009506	P:nucleosome assembly; F:DNA binding; F:protein heterodimerization activity; C:nucleosome; C:nucleus; C:plasmodesma			25.8182	-6.28567	1.43314e-05	0.000291319	0	40.607	1.657	37.276	35.952	45.606
TRINITY_DN205779_c0_g1	Picea sitchensis	XP_021891621.1protein TIFY 11c-like	P:GO:0009611; P:GO:0031347; P:GO:2000022; C:GO:0005634	P:response to wounding; P:regulation of defense response; P:regulation of jasmonic acid mediated signaling pathway; C:nucleus			36.4237	-2.75705	1.44661e-05	0.000293703	0.757	1.932	1.054	7.356	3.574	8.124
TRINITY_DN213890_c0_g2							3258.48	-2.25687	1.48441e-05	0.000299571	858.885	952.485	391.847	2841.19	2428.7	3412.48
TRINITY_DN194303_c0_g1	Picea sitchensis	XP_011624492.1serine carboxypeptidase 1 isoform X1	P:GO:0008152; F:GO:0004180	P:metabolic process; F:carboxypeptidase activity			22.4861	-5.13823	1.54697e-05	0.000310335	0.117	0.993	0	2.138	1.946	3.483
TRINITY_DN208786_c0_g5	Pinus pinaster	AQX43140.1NPF family transporter	P:GO:0055085; F:GO:0022857; C:GO:0005886; C:GO:0016021	P:transmembrane transport; F:transmembrane transporter activity; C:plasma membrane; C:integral component of membrane			28.2256	-6.43726	1.56315e-05	0.000312463	0.075	1.067	0	4.736	2.182	4.418
TRINITY_DN213130_c1_g1	Pinus taeda	XP_024161065.1O-acyltransferase WSD1-like	F:GO:0016746	F:transferase activity, transferring acyl groups			45.3966	-2.19989	1.60021e-05	0.000319491	2.858	9.148	2.625	8.683	16.726	12.86
TRINITY_DN214223_c0_g1							108.057	-1.68664	1.61738e-05	0.000322536	14.545	21.947	7.031	37.133	28.108	41.007
TRINITY_DN211492_c3_g3	Pinus taeda	XP_019706772.1 probable disease resistance protein At4g27220	F:GO:0043531	F:ADP binding			102.048	-1.36741	1.67406e-05	0.00032993	11.602	29.954	7.223	27.716	24.687	26.784
TRINITY_DN154906_c0_g1							27.879	-2.58867	1.74051e-05	0.000341312	1.141	3.608	1.13	5.515	5.921	8.399
TRINITY_DN210005_c0_g2							78.0428	-2.42119	1.83533e-05	0.000358775	4.905	6.341	3.918	32.803	12.043	44.405
TRINITY_DN190141_c0_g2	Ginkgo biloba	XP_010268020.1 protein ODORANT1-like	P:GO:0030154; P:GO:2000652; F:GO:0000976; C:GO:0005634	P:cell differentiation; P:regulation of secondary cell wall biogenesis; F:transcription regulatory region sequence-specific DNA binding; C:nucleus			33.1393	-2.53637	2.12872e-05	0.000409936	0.608	0.598	0.527	3.497	2.241	4.435
TRINITY_DN191411_c0_g1							29.6992	-2.37725	2.17666e-05	0.000416312	1.941	7.227	1.36	9.889	7.419	9.274
TRINITY_DN213890_c0_g4							87.5811	-3.26817	2.39791e-05	0.000452457	4.948	5.786	0.259	29.875	17.775	31.974
TRINITY_DN213793_c1_g5	Picea sitchensis	RWR97326.1putative pectate lyase 8	P:GO:0045490; F:GO:0030570; F:GO:0046872	P:pectin catabolic process; F:pectate lyase activity; F:metal ion binding	EC:4.2.2.2	Pectate lyase	93.718	-1.1222	2.67072e-05	0.000499454	5.651	8.401	5.777	12.838	12.125	13.023
TRINITY_DN214622_c1_g7	Cryptomeria japonica	BAX09092.1MtN3/saliva gene family	P:GO:0008643; F:GO:0051119; C:GO:0016021	P:carbohydrate transport; F:sugar transmembrane transporter activity; C:integral component of membrane			12.5031	-6.6929	2.6762e-05	0.000499817	0	0	0	1.655	2.312	2.11
TRINITY_DN211065_c4_g1							42.5846	-2.15586	2.68454e-05	0.000499817	15.728	82.111	8.89	55.651	44.385	59.023
TRINITY_DN213589_c3_g3	Picea sitchensis	ABR18056.1unknown	C:GO:0016020; C:GO:0016021	C:membrane; C:integral component of membrane			101.529	-1.92065	2.69392e-05	0.00050101	2.367	6.576	1.37	5.043	6.369	10.887
TRINITY_DN212618_c0_g9							13.5778	-6.81206	2.73162e-05	0.000505229	0	5.882	0	5.438	3.185	7.078
TRINITY_DN196697_c0_g1	Picea sitchensis	OVA03250.1Phosphoesterase domain	P:GO:0016311; F:GO:0003993; F:GO:0008198; F:GO:0008199; C:GO:0016021	P:dephosphorylation; F:acid phosphatase activity; F:ferrous iron binding; F:ferric iron binding; C:integral component of membrane	EC:3.1.3.2	Acid phosphatase	18.8286	-4.19589	2.86668e-05	0.000526738	0.213	0.907	0.671	8.946	5.508	7.455
TRINITY_DN145097_c0_g1	Picea abies	ADP55095.1dirigent-like protein	C:GO:0048046	C:apoplast			35.7252	-2.16123	2.90725e-05	0.000532448	6.419	7.75	5.183	19.636	25.855	30.687
TRINITY_DN215385_c4_g3							57.8423	-1.4629	2.91305e-05	0.000532821	12.849	42.529	11.946	36.421	35.999	35.809
TRINITY_DN209442_c0_g2	Gossypium barbadense/Gossypium hirsutum	XP_016737370.1 peroxidase 66	P:GO:0006979; P:GO:0042744; P:GO:0055114; P:GO:0098869; F:GO:0004601; F:GO:0020037; F:GO:0046872; C:GO:0005576; C:GO:0009505; C:GO:0009506	P:response to oxidative stress; P:hydrogen peroxide catabolic process; P:oxidation-reduction process; P:cellular oxidant detoxification; F:peroxidase activity; F:heme binding; F:metal ion binding; C:extracellular region; C:plant-type cell wall; C:plasmodesma	EC:1.11.1.7	Peroxidase	81.9589	-2.16431	2.94823e-05	0.000538195	3.434	4.75	1.178	11.961	7.431	13.366
TRINITY_DN208121_c2_g2	Picea sitchensis	XP_016539262.1 protein EXORDIUM-like 2	C:GO:0016020	C:membrane			201.204	-1.17901	3.02124e-05	0.000550926	24.792	54.036	30.847	78.093	54.718	53.644
TRINITY_DN187658_c0_g1	Picea sitchensis	XP_011098081.1transcription factor PAR2	P:GO:0006355; P:GO:2000280; F:GO:0000976; F:GO:0003700; F:GO:0046983	P:regulation of transcription, DNA-templated; P:regulation of root development; F:transcription regulatory region sequence-specific DNA binding; F:DNA-binding transcription factor activity; F:protein dimerization activity			26.3738	-3.19532	3.09032e-05	0.000560487	0.235	2.295	0.565	3.147	2.394	5.207
TRINITY_DN270794_c0_g1							20.4067	-3.66973	3.32301e-05	0.000595629	1.109	3.341	0	8.343	6.983	9.351
TRINITY_DN210528_c3_g1	Picea sitchensis	AKH41022.1cytochrome P450 CYP76AA22	F:GO:0005488; F:GO:0016491	F:binding; F:oxidoreductase activity			64.5527	-1.56367	3.41201e-05	0.000607057	2.964	6.352	2.433	9.023	6.794	10.604
TRINITY_DN189291_c0_g1							74.0459	-1.56925	3.50293e-05	0.000620608	7.187	9.127	4.637	17.618	14.543	18.11
TRINITY_DN201400_c0_g1	Picea sitchensis	XP_009337722.1 abscisic acid receptor PYL4-like	P:GO:0009738; P:GO:0032515; P:GO:0080163; F:GO:0004864; F:GO:0010427; F:GO:0038023; C:GO:0005634; C:GO:0005737	P:abscisic acid-activated signaling pathway; P:negative regulation of phosphoprotein phosphatase activity; P:regulation of protein serine/threonine phosphatase activity; F:protein phosphatase inhibitor activity; F:abscisic acid binding; F:signaling receptor activity; C:nucleus; C:cytoplasm			12.0871	-6.64484	3.81888e-05	0.000671057	0	0	0	2.138	4.117	3.629
TRINITY_DN182929_c0_g2							112.257	-1.35671	4.06579e-05	0.000708398	25.208	22.31	19.236	53.557	46.154	69.026
TRINITY_DN186777_c0_g1	Vigna radiata var. radiata	XP_014514605.1ABC transporter C family member 10	P:GO:0055085; F:GO:0005524; F:GO:0016887; F:GO:0042626; C:GO:0000325; C:GO:0005774; C:GO:0016021	P:transmembrane transport; F:ATP binding; F:ATPase activity; F:ATPase-coupled transmembrane transporter activity; C:plant-type vacuole; C:vacuolar membrane; C:integral component of membrane	EC:3.6.1.3; EC:3.6.1.15	Adenosinetriphosphatase; Nucleoside-triphosphate phosphatase	84.0148	-1.30916	4.37842e-05	0.00075428	23.448	26.004	27.321	65.046	48.855	62.97
TRINITY_DN215112_c2_g3	Picea sitchensis	XP_012441177.1 probable LRR receptor-like serine/threonine-protein kinase At1g53430	P:GO:0046777; F:GO:0004674; C:GO:0005886	P:protein autophosphorylation; F:protein serine/threonine kinase activity; C:plasma membrane	EC:2.7.11	Transferring phosphorus-containing groups	34.057	-2.42545	4.56902e-05	0.000783109	0.981	3.085	1.973	6.951	3.621	7.841
TRINITY_DN207673_c0_g1							63.3165	-1.71857	4.73762e-05	0.000807891	6.995	13.482	9.12	27.442	18.2	31.854
TRINITY_DN212119_c1_g9	Lactuca sativa	KVH90352.1 Galactose-binding domain-like protein	C:GO:0009505; C:GO:0016021	C:plant-type cell wall; C:integral component of membrane			25.792	-5.36196	4.78266e-05	0.000814747	1.248	0	0	47.823	10.71	31.339
TRINITY_DN210572_c1_g5	Selaginella moellendorffii	XP_002971143.1annexin D5	F:GO:0005509; C:GO:0005737	F:calcium ion binding; C:cytoplasm			108.681	-2.52372	4.84871e-05	0.000822667	1.088	56.587	4.713	10.733	15.275	24.313
TRINITY_DN215128_c1_g2							11.5088	-6.57138	5.00562e-05	0.000845476	0	2.882	0	2.971	2.949	1.664
TRINITY_DN171277_c0_g1	Amborella trichopoda	XP_011624098.1methyl-CpG-binding domain-containing protein 5 isoform X3	F:GO:0003677; C:GO:0042025	F:DNA binding; C:host cell nucleus			11.5293	-6.57677	5.09958e-05	0.000857454	0	1.815	0	1.151	1.109	1.87
TRINITY_DN212193_c3_g5	Coffea arabica	XP_027081869.1receptor kinase-like protein Xa21					13.8657	-6.84119	5.35363e-05	0.000891597	0	20.592	0	16.138	4.659	13.289
TRINITY_DN206062_c0_g1							148.289	-1.28798	5.35562e-05	0.000891597	13.041	13.707	9.024	26.236	21.774	37.035
TRINITY_DN210068_c2_g5	Picea sitchensis	PSS36357.1Heavy metal-associated isoprenylated plant protein	P:GO:0030001; F:GO:0046872	P:metal ion transport; F:metal ion binding			66.7429	-1.3245	5.58959e-05	0.000926881	8.211	19.386	9.513	23.396	27.365	27.204
TRINITY_DN206619_c0_g1							19.2161	-3.81221	5.60401e-05	0.000927178	0.235	0.053	0.134	1.765	3.102	1.45
TRINITY_DN211723_c0_g1							27.7544	-2.58141	5.93311e-05	0.000978062	0.586	3.021	0.239	2.149	2.772	3.32
TRINITY_DN206596_c3_g4							1113.97	-1.27699	6.17565e-05	0.00100915	234.11	317.78	140.314	492.117	313.515	548.033
TRINITY_DN200491_c0_g1	Pinus taeda	XP_002278232.1 laccase-17-like	P:GO:0046274; P:GO:0055114; F:GO:0005507; F:GO:0052716; C:GO:0016021; C:GO:0048046	P:lignin catabolic process; P:oxidation-reduction process; F:copper ion binding; F:hydroquinone:oxygen oxidoreductase activity; C:integral component of membrane; C:apoplast	EC:1.10.3; EC:1.10.3.2	Acting on diphenols and related substances as donors; Laccase	16.5369	-3.58852	6.48205e-05	0.00105207	0.107	0.619	0.144	1.645	1.404	2.196
TRINITY_DN210571_c0_g2	Marchantia polymorpha subsp. ruderalis	XP_024372222.1transcription factor ABORTED MICROSPORES-like	F:GO:0046983	F:protein dimerization activity			47.5024	-2.21781	6.72553e-05	0.00108395	1.973	3.619	0.977	9.352	5.827	8.759
TRINITY_DN136495_c0_g1							39.5449	-2.37183	6.92821e-05	0.00110784	0.864	7.835	2.002	5.811	5.768	10.569
TRINITY_DN208989_c3_g2	Phalaenopsis hybrid cultivar	XP_022554293.1 actin-7	P:GO:0051301; F:GO:0005524; C:GO:0005829; C:GO:0005856; C:GO:0005886; C:GO:0009506	P:cell division; F:ATP binding; C:cytosol; C:cytoskeleton; C:plasma membrane; C:plasmodesma			114.94	-1.97589	6.93097e-05	0.00110784	18.085	12.863	6.303	60.058	36.848	49.707
TRINITY_DN213592_c2_g2	Populus euphratica	XP_026406758.1probable LRR receptor-like serine/threonine-protein kinase At1g53440 isoform X3	P:GO:0009987; F:GO:0016301; C:GO:0016020	P:cellular process; F:kinase activity; C:membrane			74.1634	-1.57987	6.99841e-05	0.00111687	4.713	7.963	6.974	15.93	19.545	9.763
TRINITY_DN207140_c0_g1	Pinus pinaster	XP_006845019.2dof zinc finger protein DOF5.4	P:GO:0006355; P:GO:0009888; P:GO:0048731; F:GO:0003677; C:GO:0005634; C:GO:0016020	P:regulation of transcription, DNA-templated; P:tissue development; P:system development; F:DNA binding; C:nucleus; C:membrane			111.98	-1.1441	7.21403e-05	0.0011498	16.251	32.057	18.355	35.916	32.283	46.335
TRINITY_DN210294_c1_g1							12.6768	-6.71076	7.53435e-05	0.0011905	0	0	0	6.216	1.875	3.088
TRINITY_DN188864_c0_g2	Pinus massoniana	AGU43679.1pinocembrin chalcone synthase	P:GO:0009813; F:GO:0016210	P:flavonoid biosynthetic process; F:naringenin-chalcone synthase activity	EC:2.3.1.74	Chalcone synthase	365.762	-1.02032	7.96124e-05	0.00124996	216.398	200.015	172.386	399.563	333.637	361.56
TRINITY_DN189451_c0_g1							17.4653	-4.65559	7.9993e-05	0.00125476	0	3.17	0.441	4.966	3.456	5.482
TRINITY_DN206234_c1_g4	Taxus wallichiana var. chinensis	AEW91475.19-cis-epoxycarotenoid dioxygenase	P:GO:0016121; P:GO:0055114; F:GO:0010436; F:GO:0046872; C:GO:0009570	P:carotene catabolic process; P:oxidation-reduction process; F:carotenoid dioxygenase activity; F:metal ion binding; C:chloroplast stroma	EC:1.13.11	Acting on single donors with incorporation of molecular oxygen (oxygenases). The oxygen incorporated need not be derived from O(2)	65.6106	-1.45079	8.31589e-05	0.00129717	1.386	1.313	1.696	3.782	3.845	5.362
TRINITY_DN197231_c0_g1							10.4598	-6.4358	8.34184e-05	0.00129881	0	0	0	2.686	2.029	3.569
TRINITY_DN206235_c2_g3							145.83	-1.09483	8.49284e-05	0.00131722	4.99	8.252	4.033	10.514	10.592	16.703
TRINITY_DN189798_c0_g1	Panicum miliaceum	RLN12990.1putative 1-deoxy-D-xylulose-5-phosphate synthase, chloroplastic isoform X1	P:GO:0016114; F:GO:0003824; F:GO:0008661	P:terpenoid biosynthetic process; F:catalytic activity; F:1-deoxy-D-xylulose-5-phosphate synthase activity			78.8507	-1.43585	8.49293e-05	0.00131722	4.596	5.209	2.74	10.547	8.646	11.95
TRINITY_DN195246_c0_g1	Marchantia polymorpha subsp. ruderalis/Marchantia polymorpha	BAV53286.1 non-phototropic hypocotyl 3-like protein					190.737	-1.07974	9.2411e-05	0.00141624	10.621	18.425	15.682	29.437	23.06	31.193
TRINITY_DN192798_c0_g1	Picea sitchensis	XP_002533727.2probable amino acid permease 7	C:GO:0005886; C:GO:0016021	C:plasma membrane; C:integral component of membrane			49.7893	-1.92045	9.2475e-05	0.00141624	2.676	2.306	2.184	11.183	6.405	11.127
TRINITY_DN149631_c0_g1							16.3492	-4.0842	9.57825e-05	0.00145893	1.845	19.877	0	18.287	15.121	22.005
TRINITY_DN203580_c1_g2	Pinus tabuliformis	BAG48500.1B-class MADS-box transcription factor	P:GO:0045944; F:GO:0000977; F:GO:0003700; F:GO:0046983; C:GO:0005634	P:positive regulation of transcription by RNA polymerase II; F:RNA polymerase II regulatory region sequence-specific DNA binding; F:DNA-binding transcription factor activity; F:protein dimerization activity; C:nucleus			466.034	-2.90144	9.95481e-05	0.00151162	18.767	68.234	4.33	100.973	58.469	103.694
TRINITY_DN149747_c0_g1	Punica granatum	OEL20805.1Protein trichome birefringence-like 34	F:GO:0016413; C:GO:0005794; C:GO:0016021	F:O-acetyltransferase activity; C:Golgi apparatus; C:integral component of membrane			90.0288	-1.09037	9.9601e-05	0.00151162	11.676	13.973	14.015	28.604	25.631	26.509
TRINITY_DN186130_c1_g1	Picea sitchensis	Q50EK4.1RecName: Full=Cytochrome P450 750A1; AltName: Full=Cytochrome P450 CYPC	P:GO:0055114; F:GO:0004497; F:GO:0005506; F:GO:0016705; F:GO:0020037; C:GO:0016021	P:oxidation-reduction process; F:monooxygenase activity; F:iron ion binding; F:oxidoreductase activity, acting on paired donors, with incorporation or reduction of molecular oxygen; F:heme binding; C:integral component of membrane			140.087	-2.09971	0.000101545	0.00153835	6.121	6.181	4.56	27.047	9.46	33.655
TRINITY_DN206646_c9_g1	Papaver somniferum	XP_026383098.1peroxidase 31-like	P:GO:0006412; P:GO:0006979; P:GO:0042744; P:GO:0055114; P:GO:0098869; F:GO:0003735; F:GO:0004601; F:GO:0020037; F:GO:0046872; C:GO:0005576; C:GO:0015934	P:translation; P:response to oxidative stress; P:hydrogen peroxide catabolic process; P:oxidation-reduction process; P:cellular oxidant detoxification; F:structural constituent of ribosome; F:peroxidase activity; F:heme binding; F:metal ion binding; C:extracellular region; C:large ribosomal subunit	EC:1.11.1.7	Peroxidase	16.5366	-4.68868	0.000102327	0.00154688	0.405	0.203	0	6.578	4.494	7.755
TRINITY_DN206591_c0_g1	Picea sitchensis	XP_010251224.1 galactinol synthase 1-like	P:GO:0006012; F:GO:0047216	P:galactose metabolic process; F:inositol 3-alpha-galactosyltransferase activity	EC:2.4.1.123	Inositol 3-alpha-galactosyltransferase	137.352	-2.06173	0.000102384	0.00154688	1.621	7.323	5.978	13.112	19.144	15.511
TRINITY_DN209766_c0_g3	Picea sitchensis	XP_011082091.1gamma-glutamylcyclotransferase 2-1-like	P:GO:0006751; F:GO:0003839; F:GO:0016740; C:GO:0005737; C:GO:0016021	P:glutathione catabolic process; F:gamma-glutamylcyclotransferase activity; F:transferase activity; C:cytoplasm; C:integral component of membrane	EC:4.3.2.9	Gamma-glutamylcyclotransferase	16.822	-4.65526	0.000105805	0.00158804	0.107	2.978	0.182	4.352	3.314	2.213
TRINITY_DN209941_c0_g1	Vitis vinifera	XP_019080817.1 protein LYK2	P:GO:0006468; P:GO:0016310; P:GO:0018108; F:GO:0004672; F:GO:0004714; F:GO:0005524; F:GO:0016301; F:GO:0016740; C:GO:0016020; C:GO:0016021	P:protein phosphorylation; P:phosphorylation; P:peptidyl-tyrosine phosphorylation; F:protein kinase activity; F:transmembrane receptor protein tyrosine kinase activity; F:ATP binding; F:kinase activity; F:transferase activity; C:membrane; C:integral component of membrane			16.0261	-4.53124	0.000106638	0.00159682	0	0.213	0.125	1.272	1.309	1.253
TRINITY_DN207635_c4_g6							43.891	-1.75476	0.000107565	0.00160927	13.851	18.489	8.976	34.688	34.961	38.751
TRINITY_DN212485_c1_g6	Picea sitchensis	ABK23186.1unknown	C:GO:0016020; C:GO:0016021	C:membrane; C:integral component of membrane			115.562	-1.01902	0.000110175	0.00164248	15.984	15.372	17.521	35.949	29.783	38.022
TRINITY_DN213929_c0_g2	Picea sitchensis	XP_011620495.1UDP-glycosyltransferase 86A2	F:GO:0008194	F:UDP-glycosyltransferase activity			477.984	-1.14129	0.000110586	0.00164715	18.895	58.167	37.265	62.415	66.218	59.95
TRINITY_DN206248_c0_g3	Picea sitchensis	XP_022991766.1protein LURP-one-related 5-like					94.0875	-1.12966	0.000111542	0.00165991	3.444	5.284	4.627	9.483	8.434	9.222
TRINITY_DN205660_c0_g1	Jatropha curcas	EOY27419.1Triacylglycerol lipase, putative	P:GO:0006629	P:lipid metabolic process			26.3936	-2.18427	0.000111976	0.00166343	1.599	4.74	0.948	6.172	6.523	5.439
TRINITY_DN208975_c1_g1	Pinus tabuliformis	XP_006436142.1receptor-like protein kinase HERK 1	P:GO:0046777; F:GO:0004672; F:GO:0005524; C:GO:0005886; C:GO:0009506; C:GO:0016021	P:protein autophosphorylation; F:protein kinase activity; F:ATP binding; C:plasma membrane; C:plasmodesma; C:integral component of membrane			29.7624	-2.07934	0.000112681	0.00167096	2.772	11.636	2.366	12.816	9.873	10.046
TRINITY_DN211141_c0_g1	Ipomoea nil	XP_019151853.1 septin and tuftelin-interacting protein 1 homolog 2-like					31.9987	-1.90753	0.000117768	0.00173416	0.405	0.331	0.584	1.875	1.97	1.973
TRINITY_DN214894_c1_g1	Pinus tabuliformis	AGC13117.1tau class glutathione S-transferase	F:GO:0004364	F:glutathione transferase activity	EC:2.5.1.18	Glutathione transferase	133.182	-1.8758	0.000120751	0.00176642	16.24	12.799	18.374	48.415	100.306	36.872
TRINITY_DN209859_c2_g3	Picea sitchensis	AAF64176.1phenylcoumaran benzylic ether reductase homolog TH1	P:GO:0009807; P:GO:0055114; F:GO:0050664	P:lignan biosynthetic process; P:oxidation-reduction process; F:oxidoreductase activity, acting on NAD(P)H, oxygen as acceptor			19.5336	-2.7626	0.000120798	0.00176642	1.237	1.548	2.021	10.569	11.689	8.853
TRINITY_DN214955_c2_g1	Picea sitchensis	ABR16569.1unknown	P:GO:0006468; P:GO:0007165; F:GO:0004672; F:GO:0005524; F:GO:0043531	P:protein phosphorylation; P:signal transduction; F:protein kinase activity; F:ATP binding; F:ADP binding			9.58371	-6.30871	0.000123613	0.00180288	0	6.33	0	8.508	5.78	8.596
TRINITY_DN198354_c0_g5	Picea sitchensis	AEN84256.1chalcone synthase	P:GO:0009813; F:GO:0016210	P:flavonoid biosynthetic process; F:naringenin-chalcone synthase activity	EC:2.3.1.74	Chalcone synthase	16.5926	-4.11096	0.000124151	0.00180917	2.389	13.781	0	28.768	17.221	26.938
TRINITY_DN214557_c0_g4							16.8666	-3.66375	0.000125335	0.00182475	0.789	7.675	0.422	9.9	5.272	8.931
TRINITY_DN211807_c1_g6							17.4637	-7.17405	0.000132982	0.00191138	0	0	0	1.886	7.018	0.592
TRINITY_DN212753_c0_g1	Ginkgo biloba	XP_008459382.1 UDP-glycosyltransferase 83A1	F:GO:0016757	F:transferase activity, transferring glycosyl groups			106.151	-1.20143	0.000134354	0.0019278	4.511	14.955	7.827	15.02	13.482	15.236
TRINITY_DN213023_c2_g4	Picea sitchensis	XP_011653897.1 lipase-like PAD4	P:GO:0006629; C:GO:0016021	P:lipid metabolic process; C:integral component of membrane			245.262	-1.18673	0.000135078	0.0019349	20.836	20.688	35.11	64.081	51.285	78.395
TRINITY_DN210585_c0_g1	Picea sitchensis	XP_013624053.1 probable disease resistance protein At4g27220	P:GO:0007165; F:GO:0016787; F:GO:0043531	P:signal transduction; F:hydrolase activity; F:ADP binding			95.8725	-1.13298	0.000135803	0.00194362	7.56	16.909	10.087	16.862	20.181	21.07
TRINITY_DN197782_c0_g1	Camelina sativa	XP_010466257.1 early nodulin-like protein 3	C:GO:0046658	C:anchored component of plasma membrane			174.974	-1.00373	0.000138926	0.00198326	7.518	15.233	8.957	19.109	13.435	18.145
TRINITY_DN210536_c3_g5	Picea sitchensis	RWR90385.1Peptidase A1	P:GO:0006508; F:GO:0004190; C:GO:0016021	P:proteolysis; F:aspartic-type endopeptidase activity; C:integral component of membrane	EC:3.4.23	Acting on peptide bonds (peptidases)	143.189	-1.01037	0.000139348	0.00198702	4.489	6.736	5.384	9.736	11.689	9.102
TRINITY_DN207155_c0_g3							10.0595	-6.38001	0.000139462	0.00198702	0	2.775	0	1.754	3.928	3.698
TRINITY_DN215592_c27_g2	Pinus tabuliformis	AJP06270.1DAL14, partial	P:GO:0045944; F:GO:0000977; F:GO:0003700; F:GO:0046983; C:GO:0005634	P:positive regulation of transcription by RNA polymerase II; F:RNA polymerase II regulatory region sequence-specific DNA binding; F:DNA-binding transcription factor activity; F:protein dimerization activity; C:nucleus			26.3386	-2.13901	0.00014206	0.00201773	3.028	5.594	2.97	16.939	14.331	17.252
TRINITY_DN207691_c0_g1	Picea sitchensis	RDX74527.121.7 kDa class VI heat shock protein					39.8966	-2.51092	0.000142944	0.00202686	3.679	7.995	2.079	16.939	7.561	16.935
TRINITY_DN211442_c0_g2	Pinus pinaster	AQX43159.1NPF family transporter	P:GO:0055085; F:GO:0042937; C:GO:0016021	P:transmembrane transport; F:tripeptide transmembrane transporter activity; C:integral component of membrane			108.789	-1.43062	0.0001434	0.00203162	2.005	4.9	3.487	8.398	6.346	10.381
TRINITY_DN207795_c0_g1	Picea sitchensis	4LEJ_AChain A, Crystal Structure of the Korean pine (Pinus koraiensis) vicilin	P:GO:0048316; P:GO:0070207; F:GO:0005507; F:GO:0045735	P:seed development; P:protein homotrimerization; F:copper ion binding; F:nutrient reservoir activity			43.0657	-2.8361	0.000145217	0.00205218	1.173	2.626	0.096	5.317	3.574	5.851
TRINITY_DN210163_c0_g4							21.3599	-2.97604	0.000148278	0.00209017	1.088	5.241	0.556	4.067	7.926	8.339
TRINITY_DN67372_c0_g1	Picea sitchensis	PSR96540.1Non-specific lipid-transfer protein	P:GO:0006869	P:lipid transport			119.557	-2.03525	0.000148692	0.00209426	11.388	8.326	3.43	24.01	26.055	44.07
TRINITY_DN199506_c0_g1							16.4417	-5.62189	0.000150428	0.00210987	0	0.384	0.192	3.596	3.715	4.495
TRINITY_DN198119_c0_g3	Pinus taeda	AAW59269.1water-stress inducible protein 3					383.104	-1.31847	0.000153685	0.00214841	68.5	109.492	36.604	113.505	137.425	164.236
TRINITY_DN199053_c0_g1	Picea sitchensis	ADM73997.1auxin responsive family-like protein	P:GO:0009733	P:response to auxin			74.8382	-1.6205	0.000156824	0.00218683	2.346	5.359	2.893	9.067	5.272	9.986
TRINITY_DN204315_c0_g1							16.3391	-4.54876	0.000157266	0.00219075	0	1.793	0.201	1.184	2.56	1.639
TRINITY_DN103664_c0_g1	Pinus taeda	Q50EK4.1RecName: Full=Cytochrome P450 750A1; AltName: Full=Cytochrome P450 CYPC	P:GO:0055114; F:GO:0004497; F:GO:0005506; F:GO:0016705; F:GO:0020037; C:GO:0016021	P:oxidation-reduction process; F:monooxygenase activity; F:iron ion binding; F:oxidoreductase activity, acting on paired donors, with incorporation or reduction of molecular oxygen; F:heme binding; C:integral component of membrane			31.7949	-2.82945	0.000157716	0.00219382	3.913	4.814	3.018	25.052	11.064	36.092
TRINITY_DN201901_c0_g1	Picea sitchensis	XP_015056945.1serine/threonine-protein kinase UCN-like	P:GO:0006468; F:GO:0004672; C:GO:0005622; C:GO:0110165	P:protein phosphorylation; F:protein kinase activity; C:intracellular; C:cellular anatomical entity			152.524	-1.15866	0.000158814	0.00220726	5.342	7.75	6.725	10.821	16.784	12.508
TRINITY_DN181802_c0_g1	Elaeis guineensis	XP_010941035.1 probable leucine-rich repeat receptor-like protein kinase At5g63930	P:GO:0006468; F:GO:0004672; F:GO:0005524; C:GO:0005886; C:GO:0016021	P:protein phosphorylation; F:protein kinase activity; F:ATP binding; C:plasma membrane; C:integral component of membrane			87.3822	-1.14297	0.000162783	0.00225498	5.193	4.889	5.46	11.424	10.38	14.095
TRINITY_DN210524_c0_g1	Acinetobacter baumannii	XP_024539910.1mycophenolic acid synthesis protein B-like					38.2253	-2.20688	0.000164197	0.0022671	0.629	2.466	1.705	7.543	6.039	9.531
TRINITY_DN191171_c0_g1	Erythranthe guttata	XP_012847536.1 homeobox-leucine zipper protein ATHB-13	P:GO:0006355; F:GO:0003677	P:regulation of transcription, DNA-templated; F:DNA binding			90.8077	-1.20301	0.000164967	0.00227587	7.059	13.514	6.993	13.233	19.167	17.167
TRINITY_DN179935_c0_g2	Picea sitchensis	ABK22538.1unknown					99.179	-1.18303	0.000167248	0.00230131	5.747	8.124	3.736	9.659	11.842	11.727
TRINITY_DN208243_c0_g1	Spinacia oleracea	XP_021858409.1early nodulin-93-like	C:GO:0016021	C:integral component of membrane			14.516	-4.43826	0.000167358	0.00230131	0.245	0.502	0.402	7.51	6.829	5.645
TRINITY_DN154980_c0_g1	Pinus taeda	XP_018822967.1 thaumatin-like protein	P:GO:0006952; C:GO:0005576	P:defense response; C:extracellular region			29.8014	-2.23206	0.000172227	0.00236248	1.461	1.559	0.623	4.024	5.296	6.185
TRINITY_DN205793_c0_g1	Physcomitrella patens	XP_024373646.1E3 ubiquitin-protein ligase TRIM37-like	P:GO:0016567; P:GO:0051090; F:GO:0003824; F:GO:0005515; C:GO:0005622; C:GO:0110165	P:protein ubiquitination; P:regulation of DNA-binding transcription factor activity; F:catalytic activity; F:protein binding; C:intracellular; C:cellular anatomical entity			75.1157	-1.25258	0.000173656	0.00238006	1.61	1.206	1.169	2.938	3.692	3.723
TRINITY_DN215295_c2_g3	Picea sitchensis	OMO65965.1Lipase, class 3	P:GO:0006629	P:lipid metabolic process			77.5304	-1.29652	0.000173933	0.00238006	3.38	9.864	4.876	10.58	12.526	9.059
TRINITY_DN204305_c3_g1	Acinetobacter baumannii	RWR82031.1Gibberellin regulated protein	C:GO:0016020	C:membrane			155.638	-2.48479	0.000174396	0.00238445	2.079	88.633	10.049	29.799	18.518	53.387
TRINITY_DN197567_c0_g1							88.699	-1.99546	0.00017719	0.00241357	1.301	7.931	4.991	12.509	8.009	13.855
TRINITY_DN210788_c3_g11							8.99954	-6.2187	0.00017959	0.00243764	0	2.284	0	1.272	0.92	1.596
TRINITY_DN194805_c0_g1	Picea sitchensis	XP_027115568.1bidirectional sugar transporter SWEET3-like	P:GO:0008643; F:GO:0051119; C:GO:0016021	P:carbohydrate transport; F:sugar transmembrane transporter activity; C:integral component of membrane			11.4834	-6.56902	0.000181474	0.00245925	0	0.448	0	3.717	0.814	2.745
TRINITY_DN212362_c1_g5							31.7743	-3.08247	0.000181942	0.00246362	1.535	2.274	0	6.425	7.702	7.807
TRINITY_DN209307_c2_g2	Picea sitchensis	XP_022735947.1abscisic acid receptor PYL8-like	P:GO:0009738; P:GO:0080163; F:GO:0004864; F:GO:0010427; F:GO:0038023; C:GO:0005634; C:GO:0005737	P:abscisic acid-activated signaling pathway; P:regulation of protein serine/threonine phosphatase activity; F:protein phosphatase inhibitor activity; F:abscisic acid binding; F:signaling receptor activity; C:nucleus; C:cytoplasm			9.50567	-6.29837	0.000185516	0.00249794	0	0	0	1.842	1.309	3.054
TRINITY_DN198721_c0_g1	Picea sitchensis	XP_009388857.1 sugar carrier protein C-like	P:GO:0008643; P:GO:0055085; F:GO:0022857; C:GO:0016021	P:carbohydrate transport; P:transmembrane transport; F:transmembrane transporter activity; C:integral component of membrane			16.136	-5.62575	0.000188972	0.00252829	0.064	0	0	1.261	2.076	1.99
TRINITY_DN213616_c0_g3	Picea sitchensis	XP_010241748.1 UDP-glycosyltransferase 92A1-like	F:GO:0008194	F:UDP-glycosyltransferase activity			33.6043	-2.08005	0.000191604	0.00255944	1.973	4.505	1.092	7.927	5.001	7.978
TRINITY_DN199155_c0_g2	Picea sitchensis	XP_009803233.1 3-oxoacyl-[acyl-carrier-protein] synthase I, chloroplastic-like	F:GO:0016740	F:transferase activity			8.80067	-6.18685	0.000193432	0.0025818	0	0	0	6.194	5.709	8.613
TRINITY_DN191110_c0_g1							80.9535	-1.15206	0.0001965	0.00261859	4.127	5.359	4.905	10.876	9.566	12.457
TRINITY_DN204080_c1_g2	Ginkgo biloba	EOY10575.1Myb domain protein 5, putative	F:GO:0003677	F:DNA binding			82.2266	-1.39323	0.000198116	0.00263387	2.495	5.337	4.512	10.547	8.245	9.583
TRINITY_DN210861_c3_g1	Picea sitchensis	GAV79035.1Thaumatin domain-containing protein	P:GO:0006952; C:GO:0005576	P:defense response; C:extracellular region			623.307	-1.13683	0.000200464	0.0026609	412.216	452.55	265.424	664.013	640.83	773.187
TRINITY_DN215437_c1_g2							21.6409	-3.51186	0.00020467	0.00271031	0	10.227	3.209	14.066	15.369	13.709
TRINITY_DN198854_c0_g1	Eucalyptus grandis	XP_010030081.2 actin-101	P:GO:0000281; P:GO:0000902; P:GO:0006897; P:GO:0006909; P:GO:0006935; P:GO:0006972; P:GO:0007010; P:GO:0042331; P:GO:0051591; F:GO:0005200; F:GO:0005524; F:GO:0017022; C:GO:0001891; C:GO:0005884; C:GO:0030864; C:GO:0031143; C:GO:0032009; C:GO:0032010; C:GO:0044291; C:GO:0060187; C:GO:0061836; C:GO:0061851; C:GO:0070685	P:mitotic cytokinesis; P:cell morphogenesis; P:endocytosis; P:phagocytosis; P:chemotaxis; P:hyperosmotic response; P:cytoskeleton organization; P:phototaxis; P:response to cAMP; F:structural constituent of cytoskeleton; F:ATP binding; F:myosin binding; C:phagocytic cup; C:actin filament; C:cortical actin cytoskeleton; C:pseudopodium; C:early phagosome; C:phagolysosome; C:cell-cell contact zone; C…			113.999	-1.23756	0.00020828	0.00275161	5.225	6.821	3.726	10.931	8.705	14.275
TRINITY_DN214871_c0_g3	Amborella trichopoda	XP_011621860.1L-gulonolactone oxidase 2 isoform X2	F:GO:0016491; F:GO:0050660	F:oxidoreductase activity; F:flavin adenine dinucleotide binding			138.199	-1.13726	0.000210395	0.00276816	6.014	7.088	6.706	11.797	13.199	20.315
TRINITY_DN175793_c0_g1	Cucumis melo	XP_008457906.1 probable WRKY transcription factor 51	F:GO:0003677	F:DNA binding			27.4202	-1.94256	0.000210519	0.00276816	0.757	0.683	0.651	2.719	3.149	2.917
TRINITY_DN190069_c0_g2							16.7934	-5.6869	0.000229084	0.00299124	0.107	0.79	0	2.752	2.029	4.967
TRINITY_DN188368_c1_g5	Juglans regia	XP_018829295.1 UPF0481 protein At3g47200-like	C:GO:0016020; C:GO:0016021	C:membrane; C:integral component of membrane			19.319	-2.71065	0.000231839	0.00302486	0.181	0.811	0.431	1.623	1.934	2.196
TRINITY_DN202970_c1_g1	Pinus taeda	AZA14773.1Xyloglucan endotransglucosylase/hydrolase protein 9	P:GO:0010411; P:GO:0042546; P:GO:0071555; F:GO:0004553; F:GO:0016762; C:GO:0005618; C:GO:0048046	P:xyloglucan metabolic process; P:cell wall biogenesis; P:cell wall organization; F:hydrolase activity, hydrolyzing O-glycosyl compounds; F:xyloglucan:xyloglucosyl transferase activity; C:cell wall; C:apoplast	EC:2.4.1.207	Xyloglucan:xyloglucosyl transferase	168.896	-1.55645	0.000234515	0.00305268	13.979	30.637	7.434	28.428	19.981	49.672
TRINITY_DN197985_c0_g2	Glycine max	XP_003528403.1oligopeptide transporter 4	P:GO:0035672; F:GO:0035673; C:GO:0005887	P:oligopeptide transmembrane transport; F:oligopeptide transmembrane transporter activity; C:integral component of plasma membrane			39.8361	-1.80439	0.00024937	0.00321868	8.093	9.735	8.689	30.358	20.064	33.938
TRINITY_DN199048_c0_g2	Cinnamomum micranthum f. kanehirae	RWR96505.1ABC transporter C family member 10-like protein	P:GO:0055085; F:GO:0005524; F:GO:0016887; F:GO:0042626; C:GO:0000325; C:GO:0005774; C:GO:0016021	P:transmembrane transport; F:ATP binding; F:ATPase activity; F:ATPase-coupled transmembrane transporter activity; C:plant-type vacuole; C:vacuolar membrane; C:integral component of membrane	EC:3.6.1.3; EC:3.6.1.15	Adenosinetriphosphatase; Nucleoside-triphosphate phosphatase	120.097	-1.10145	0.000251983	0.00324742	21.7	29.324	34.966	50.805	53.939	70.039
TRINITY_DN213883_c0_g2							8.13326	-6.07131	0.000256833	0.00330233	0	1.089	0	1.743	1.522	1.39
TRINITY_DN192693_c1_g1							274.27	-1.6127	0.000266949	0.00341155	158.572	166.549	67.546	335.778	283.119	372.687
TRINITY_DN205798_c1_g2	Picea glauca	KUM51227.1hypothetical protein ABT39_MTgene1074 (mitochondrion)	C:GO:0005739	C:mitochondrion			18.9403	-2.7838	0.000278991	0.00354392	0.277	0.662	0.134	1.217	1.923	1.321
TRINITY_DN208811_c0_g2							19.922	-3.15207	0.000286263	0.00361719	2.005	3.437	0	11.325	9.33	9.677
TRINITY_DN214180_c5_g6	Hevea brasiliensis	XP_021664574.1 chlorophyll a-b binding protein 151, chloroplastic-like	P:GO:0009416; P:GO:0009768; P:GO:0018298; F:GO:0016168; F:GO:0046872; C:GO:0009522; C:GO:0009523; C:GO:0009535; C:GO:0009941; C:GO:0010287; C:GO:0016021	P:response to light stimulus; P:photosynthesis, light harvesting in photosystem I; P:protein-chromophore linkage; F:chlorophyll binding; F:metal ion binding; C:photosystem I; C:photosystem II; C:chloroplast thylakoid membrane; C:chloroplast envelope; C:plastoglobule; C:integral component of membrane			978.532	-1.30682	0.000297248	0.00373079	404.677	700.58	180.404	708.415	683.116	726.835
TRINITY_DN202286_c0_g1	Cucurbita maxima	XP_022993630.1putative methylesterase 11, chloroplastic	P:GO:0009694; P:GO:0009696; F:GO:0080030; F:GO:0080031; F:GO:0080032	P:jasmonic acid metabolic process; P:salicylic acid metabolic process; F:methyl indole-3-acetate esterase activity; F:methyl salicylate esterase activity; F:methyl jasmonate esterase activity	EC:3.1.1.1	Carboxylesterase	74.1619	-1.08272	0.000298548	0.00374152	4.073	11.241	4.474	8.979	8.304	9.042
TRINITY_DN202839_c0_g1	Picea sitchensis	XP_024371975.1gibberellin receptor GID1C-like	F:GO:0016787	F:hydrolase activity			194.968	-1.22601	0.000300679	0.00375443	14.331	20.453	25.357	51.408	34.064	52.366
TRINITY_DN204909_c0_g2							8.39455	-6.1195	0.000304088	0.00378838	0	14.849	0	6.26	8.787	13.229
TRINITY_DN212004_c0_g15							14.3874	-5.42324	0.000323175	0.00400175	0	25.566	0.795	8.99	8.776	12.731
TRINITY_DN207380_c4_g4							13.7938	-4.29764	0.000333698	0.00410862	0	2.775	0.469	1.743	1.64	1.724
TRINITY_DN212460_c2_g2							9.20301	-6.2505	0.000336734	0.00413088	0	4.451	0	2.861	9.542	4.247
TRINITY_DN205998_c1_g6	Picea sitchensis	ADM77925.1unusual floral organs-like protein					149.902	-1.24017	0.000348871	0.00427044	2.676	7.718	5.192	8.245	10.073	10.157
TRINITY_DN208989_c1_g1							106.881	-1.20544	0.000354923	0.00432877	27.362	23.826	18.01	51.824	44.468	59.813
TRINITY_DN201629_c2_g6							8.05377	-6.05912	0.000369405	0.00448266	0	0.993	0	0.537	0.401	0.832
TRINITY_DN330591_c0_g1							14.832	-3.09557	0.000378701	0.00457567	1.034	5.86	1.14	8.08	7.608	11.264
TRINITY_DN182361_c0_g1							31.6111	-2.0046	0.00038085	0.00459834	0.842	2.573	2.069	4.572	5.272	6.64
TRINITY_DN207909_c6_g9	Picea sitchensis	XP_010925860.1 dynein light chain LC6, flagellar outer arm-like	P:GO:0007017; P:GO:2000582; F:GO:0003774; F:GO:0045505; F:GO:0051959; C:GO:0005737; C:GO:0005874; C:GO:0030286	P:microtubule-based process; P:positive regulation of ATP-dependent microtubule motor activity, plus-end-directed; F:motor activity; F:dynein intermediate chain binding; F:dynein light intermediate chain binding; C:cytoplasm; C:microtubule; C:dynein complex	EC:3.6.1.15	Nucleoside-triphosphate phosphatase	22.1064	-3.32916	0.000393562	0.00473484	1.184	2.188	0	6.008	4.4	9.737
TRINITY_DN216018_c0_g1	Glycine soja	KHN43395.1Putative expansin-A17	C:GO:0110165	C:cellular anatomical entity			8.52811	-6.13938	0.000396684	0.00476899	0	0.694	0	2.719	0.955	1.887
TRINITY_DN199325_c1_g1							7.69362	-5.99307	0.000401141	0.00481913	0	2.135	0	1.82	1.651	2.883
TRINITY_DN212782_c0_g2	Asparagus officinalis	XP_020273598.1probable proline transporter 2 isoform X1	P:GO:0006865; C:GO:0005886; C:GO:0016021	P:amino acid transport; C:plasma membrane; C:integral component of membrane			157.894	-1.24933	0.000411386	0.00491415	3.53	3.907	9.685	15.02	14.85	18.213
TRINITY_DN207401_c0_g1	Physcomitrella patens	XP_024377456.1cadmium/zinc-transporting ATPase HMA2-like	P:GO:0000041; P:GO:0070838; P:GO:0098662; F:GO:0005385; F:GO:0005524; F:GO:0015086; F:GO:0019829; F:GO:0046872; C:GO:0016021	P:transition metal ion transport; P:divalent metal ion transport; P:inorganic cation transmembrane transport; F:zinc ion transmembrane transporter activity; F:ATP binding; F:cadmium ion transmembrane transporter activity; F:ATPase-coupled cation transmembrane transporter activity; F:metal ion binding; C:integral component of membrane			53.7926	-1.5633	0.000414772	0.00494215	0.81	5.273	2.108	3.322	3.444	5.087
TRINITY_DN215585_c46_g1	Picea sitchensis	XP_011628076.1centromere protein V	F:GO:0016846	F:carbon-sulfur lyase activity			59.2459	-1.24347	0.000414974	0.00494215	5.694	9.437	5.403	10.24	13.116	9.771
TRINITY_DN139395_c0_g1	Picea sitchensis	RWR94224.1protein EXORDIUM-like protein 2	C:GO:0016020; C:GO:0016021	C:membrane; C:integral component of membrane			8.33618	-6.10664	0.000419248	0.00498331	0	1.452	0	2.993	1.109	2.179
TRINITY_DN205096_c1_g2	Picea glauca	AUR53397.1beta-glucosidase 1	P:GO:0005975; F:GO:0008422; F:GO:0102483	P:carbohydrate metabolic process; F:beta-glucosidase activity; F:scopolin beta-glucosidase activity	EC:3.2.1.21	Beta-glucosidase	68.8288	-1.16119	0.000439508	0.00518385	3.604	1.665	2.395	7.565	7.832	6.889
TRINITY_DN197662_c0_g1	Phoenix dactylifera	XP_020084019.1laccase-6 isoform X1	P:GO:0008152; F:GO:0016491; F:GO:0046872; C:GO:0005576; C:GO:0016020	P:metabolic process; F:oxidoreductase activity; F:metal ion binding; C:extracellular region; C:membrane			57.9967	-1.51306	0.000445496	0.00524713	1.354	0.854	1.581	3.585	3.539	5.602
TRINITY_DN210357_c1_g2							27.8287	-4.27387	0.000453798	0.00532256	0.075	0.64	0.364	3.212	6.086	0.695
TRINITY_DN210524_c0_g2	Physcomitrella patens	XP_024404142.1mycophenolic acid synthesis protein B-like isoform X2					7.84652	-6.02202	0.000468644	0.00547001	0	0.961	0	2.84	2.524	5.396
TRINITY_DN208812_c0_g1	Picea sitchensis	XP_012448129.1 transcription repressor OFP17-like					52.0927	-1.55243	0.00047048	0.00548003	1.834	2.829	3.41	7.269	7.761	9.042
TRINITY_DN195501_c0_g1	Nelumbo nucifera	XP_010249741.1 indole-3-pyruvate monooxygenase YUCCA2-like	F:GO:0000166; F:GO:0004497; F:GO:0050662; C:GO:0016020	F:nucleotide binding; F:monooxygenase activity; F:coenzyme binding; C:membrane			44.0715	-2.40344	0.000471469	0.00548417	0.235	0.149	0.853	3.322	1.64	3.732
TRINITY_DN146504_c0_g1	Populus euphratica	XP_011008185.1 glucose-1-phosphate adenylyltransferase small subunit 2, chloroplastic	P:GO:0005978; P:GO:0019252; F:GO:0005524; F:GO:0008878; C:GO:0009507	P:glycogen biosynthetic process; P:starch biosynthetic process; F:ATP binding; F:glucose-1-phosphate adenylyltransferase activity; C:chloroplast	EC:2.7.7.27	Glucose-1-phosphate adenylyltransferase	13.4356	-3.79808	0.0004717	0.00548417	0.16	0	0	1.48	1.003	1.518
TRINITY_DN193470_c0_g2	Picea sitchensis	XP_024534048.1linoleate 9S-lipoxygenase	P:GO:0031408; P:GO:0055114; F:GO:0016702; F:GO:0046872	P:oxylipin biosynthetic process; P:oxidation-reduction process; F:oxidoreductase activity, acting on single donors with incorporation of molecular oxygen, incorporation of two atoms of oxygen; F:metal ion binding	EC:1.13.11	Acting on single donors with incorporation of molecular oxygen (oxygenases). The oxygen incorporated need not be derived from O(2)	8.21824	-6.08479	0.000473173	0.00549618	0	2.829	0	9.571	6.535	3.397
TRINITY_DN213968_c0_g1	Picea sitchensis	ABZ01364.1cytochrome p450	P:GO:0055114; F:GO:0004497; F:GO:0005506; F:GO:0016705; F:GO:0020037; C:GO:0016021	P:oxidation-reduction process; F:monooxygenase activity; F:iron ion binding; F:oxidoreductase activity, acting on paired donors, with incorporation or reduction of molecular oxygen; F:heme binding; C:integral component of membrane			10.4986	-6.44029	0.000488213	0.00563588	0	0.737	0	10.207	1.557	10.166
TRINITY_DN211766_c0_g3							426.673	-3.18187	0.000493066	0.00567245	107.783	227.983	21.382	592.246	450.787	692.108
TRINITY_DN213254_c3_g1							70.4155	-1.37231	0.0004996	0.0057437	6.409	14.913	13.268	23.955	21.762	26.835
TRINITY_DN209053_c1_g5	Beta vulgaris subsp. vulgaris	XP_010671285.1 UNC93-like protein 1	P:GO:0055085; F:GO:0022857; C:GO:0016021	P:transmembrane transport; F:transmembrane transporter activity; C:integral component of membrane			69.0815	-1.24537	0.000502911	0.00577387	6.6	14.198	6.083	18.221	12.102	16.163
TRINITY_DN214796_c4_g7							29.4465	-3.79108	0.000507694	0.00582481	4.969	8.017	0	51.177	11.524	50.522
TRINITY_DN209088_c0_g1	Pinus tabuliformis	AXU25935.1cytochrome P450 CYP701A24	P:GO:0009686; P:GO:0010241; F:GO:0005506; F:GO:0016788; F:GO:0020037; F:GO:0052615; F:GO:0052616; F:GO:0052617; C:GO:0005783; C:GO:0009707; C:GO:0016021	P:gibberellin biosynthetic process; P:ent-kaurene oxidation to kaurenoic acid; F:iron ion binding; F:hydrolase activity, acting on ester bonds; F:heme binding; F:ent-kaurene oxidase activity; F:ent-kaur-16-en-19-ol oxidase activity; F:ent-kaur-16-en-19-al oxidase activity; C:endoplasmic reticulum; C:chloroplast outer membrane; C:integral component of membrane	EC:1.14.14.86; EC:1.14.13	Ent-kaurene monooxygenase; Acting on paired donors, with incorporation or reduction of molecular oxygen. The oxygen incorporated need not be derived from O(2)	708.973	-1.24678	0.000519764	0.00594304	10.055	20.389	23.489	35.763	33.321	49.08
TRINITY_DN63069_c0_g1	Picea sitchensis	XP_022728666.1probable protein phosphatase 2C 27	P:GO:0001101; P:GO:0006470; P:GO:0006950; P:GO:0009628; P:GO:1901700; F:GO:0004724; F:GO:0046872; C:GO:0005622; C:GO:0110165	P:response to acid chemical; P:protein dephosphorylation; P:response to stress; P:response to abiotic stimulus; P:response to oxygen-containing compound; F:magnesium-dependent protein serine/threonine phosphatase activity; F:metal ion binding; C:intracellular; C:cellular anatomical entity	EC:3.1.3.16	Protein-serine/threonine phosphatase	74.5811	-1.60256	0.000526894	0.00600823	4.361	6.992	1.552	9.801	8.622	9.677
TRINITY_DN180598_c0_g1							7.84391	-6.02153	0.000538285	0.00612568	0	1.793	0	0.713	1.675	1.844
TRINITY_DN212316_c1_g1	Picea engelmannii x Picea glauca	ADZ45514.1(E,E)-alpha-farnesene synthase/(E)-beta-ocimene synthase	P:GO:0045338; F:GO:0000287; F:GO:0010334; C:GO:0005737	P:farnesyl diphosphate metabolic process; F:magnesium ion binding; F:sesquiterpene synthase activity; C:cytoplasm			19.8608	-2.42556	0.000541302	0.00615169	0.352	0.395	0.508	2.916	2.182	1.896
TRINITY_DN33662_c0_g1	Populus trichocarpa	XP_024461323.1ADP,ATP carrier protein 3, mitochondrial	P:GO:0015866; P:GO:0015867; P:GO:0055085; F:GO:0005471; C:GO:0005743; C:GO:0009941; C:GO:0016021	P:ADP transport; P:ATP transport; P:transmembrane transport; F:ATP:ADP antiporter activity; C:mitochondrial inner membrane; C:chloroplast envelope; C:integral component of membrane			95.013	-1.04315	0.000541707	0.00615214	38.323	55.488	31.651	70.407	72.245	64.848
TRINITY_DN205646_c1_g1							7.48087	-5.95328	0.000559772	0.00631267	0	3.149	0	6.578	11.689	15.073
TRINITY_DN215308_c4_g4	Picea sitchensis	XP_010030282.1 lipase-like PAD4	P:GO:0006629; C:GO:0016021	P:lipid metabolic process; C:integral component of membrane			248.986	-1.0863	0.000559782	0.00631267	35.37	76.784	39.871	72.063	51.781	100.871
TRINITY_DN131889_c1_g1	Pinus monticola	ADW94528.1putative truncated TIR-NBS-LRR protein	P:GO:0007165; F:GO:0043531	P:signal transduction; F:ADP binding			15.3639	-3.80284	0.000562035	0.00632326	0	22.652	4.407	23.692	14.425	23.601
TRINITY_DN200989_c1_g1	Picea sitchensis	XP_026661219.1probable apyrase 2 isoform X1	F:GO:0000166; F:GO:0016787; F:GO:0043167; C:GO:0016020	F:nucleotide binding; F:hydrolase activity; F:ion binding; C:membrane			16.2738	-2.78335	0.00056293	0.00632759	0.416	2.53	0.192	2.818	1.887	2.608
TRINITY_DN214440_c3_g3	Picea sitchensis	XP_018728093.1 GDSL esterase/lipase At5g45910	F:GO:0016788	F:hydrolase activity, acting on ester bonds			21.8792	-2.34545	0.000563985	0.00633251	1.248	2.498	0.958	4.024	5.532	7.687
TRINITY_DN203575_c1_g1	Gossypium barbadense	OMP00790.1Small GTPase superfamily	P:GO:0007264; F:GO:0000166; F:GO:0003924; F:GO:0005525; C:GO:0016020; C:GO:0016021	P:small GTPase mediated signal transduction; F:nucleotide binding; F:GTPase activity; F:GTP binding; C:membrane; C:integral component of membrane			38.1309	-2.65203	0.000574356	0.0064318	0.331	9.159	1.427	5.405	4.459	5.576
TRINITY_DN186199_c0_g2	Picea sitchensis	AKH04267.1putative oxidoreductase	F:GO:0016829; C:GO:0016020	F:lyase activity; C:membrane			47.7369	-1.73539	0.000575141	0.0064363	5.95	9.575	2.74	14.505	18.023	11.873
TRINITY_DN197058_c1_g1	Coffea eugenioides	XP_027167508.1ABC transporter G family member 11	P:GO:0009611; P:GO:0009651; P:GO:0009737; P:GO:0010222; P:GO:0010345; P:GO:0010588; P:GO:0015908; P:GO:0042335; P:GO:0055085; P:GO:0080051; F:GO:0005524; F:GO:0015245; F:GO:0015562; F:GO:0016887; F:GO:0042803; C:GO:0009897; C:GO:0016021	P:response to wounding; P:response to salt stress; P:response to abscisic acid; P:stem vascular tissue pattern formation; P:suberin biosynthetic process; P:cotyledon vascular tissue pattern formation; P:fatty acid transport; P:cuticle development; P:transmembrane transport; P:cutin transport; F:ATP binding; F:fatty acid transmembrane transporter activity; F:efflux transmembrane transporter activi…	EC:3.6.1.3; EC:3.6.1.15	Adenosinetriphosphatase; Nucleoside-triphosphate phosphatase	182.425	-1.07086	0.000581198	0.00649976	3.498	5.764	5.652	11.183	7.867	10.492
TRINITY_DN214755_c1_g2	Corchorus olitorius	OMO51770.1Retrotransposon gag protein	P:GO:0015074; F:GO:0003676	P:DNA integration; F:nucleic acid binding			42.5297	-2.49922	0.000586261	0.00653467	0.821	0.758	0.604	19.109	4.435	9.394
TRINITY_DN203487_c0_g3	Amborella trichopoda	XP_011624098.1methyl-CpG-binding domain-containing protein 5 isoform X3	F:GO:0003677; C:GO:0042025	F:DNA binding; C:host cell nucleus			145.031	-1.40308	0.000594102	0.00658717	1.887	2.893	4.091	7.784	11.606	8.227
TRINITY_DN206719_c2_g3	Cinnamomum micranthum f. kanehirae	RWR80670.1NAC domain-containing protein 7	P:GO:0006355; F:GO:0003677; C:GO:0005634	P:regulation of transcription, DNA-templated; F:DNA binding; C:nucleus			41.5091	-1.55562	0.000608615	0.00672594	1.269	0.993	0.508	2.807	2.465	3.011
TRINITY_DN200479_c0_g1							95.8434	-1.23745	0.000616817	0.00679872	6.067	7.771	4.426	13.671	8.363	12.594
TRINITY_DN213731_c0_g1	Picea sitchensis	XP_022870216.1cellulose synthase-like protein E1	P:GO:0071554; P:GO:0071840; F:GO:0016758; C:GO:0005794; C:GO:0016020	P:cell wall organization or biogenesis; P:cellular component organization or biogenesis; F:transferase activity, transferring hexosyl groups; C:Golgi apparatus; C:membrane			107.569	-1.39504	0.000651337	0.00712236	3.508	10.312	5.068	11.906	7.856	15.416
TRINITY_DN199428_c0_g2	Pinus tabuliformis	AGC13117.1tau class glutathione S-transferase	F:GO:0004364	F:glutathione transferase activity	EC:2.5.1.18	Glutathione transferase	68.7051	-1.36055	0.000666001	0.00725874	5.225	4.772	6.38	16.018	17.811	10.844
TRINITY_DN203066_c0_g1							293.019	-1.10282	0.000673025	0.0073129	9.117	10.013	8.603	11.183	22.293	22.245
TRINITY_DN119557_c0_g1							6.80913	-5.81591	0.000705748	0.00760951	0	2.573	0	1.634	1.097	1.802
TRINITY_DN211258_c1_g4	Picea sitchensis	AUR53395.1beta-glucosidase 1	P:GO:0005975; F:GO:0005524; F:GO:0008422; F:GO:0016887; F:GO:0102483; C:GO:0016021	P:carbohydrate metabolic process; F:ATP binding; F:beta-glucosidase activity; F:ATPase activity; F:scopolin beta-glucosidase activity; C:integral component of membrane	EC:3.6.1.3; EC:3.2.1.21; EC:3.6.1.15	Adenosinetriphosphatase; Beta-glucosidase; Nucleoside-triphosphate phosphatase	51.5269	-1.39395	0.000732569	0.00783844	3.721	6.394	2.347	8.475	5.732	8.665
TRINITY_DN198181_c0_g1	Picea sitchensis	ABK22603.1unknown					57.0577	-1.66943	0.000739841	0.00789617	9.33	13.151	3.841	23.867	24.263	18.814
TRINITY_DN205231_c3_g2	Picea sitchensis	XP_010907029.1 UDP-glycosyltransferase 86A1-like isoform X1	P:GO:0044237; F:GO:0016740	P:cellular metabolic process; F:transferase activity			32.152	-2.08241	0.000740774	0.00790112	2.644	4.238	1.629	11.545	5.532	10.861
TRINITY_DN182947_c0_g1	Picea sitchensis	ACN40652.1unknown					7.03053	-5.86108	0.000741339	0.00790214	0	0.288	0	0.844	1.203	0.601
TRINITY_DN213061_c0_g7	Picea sitchensis	ABH09327.1putative aquaporin	P:GO:0055085; F:GO:0015250; C:GO:0005773; C:GO:0005886; C:GO:0009506; C:GO:0016021	P:transmembrane transport; F:water channel activity; C:vacuole; C:plasma membrane; C:plasmodesma; C:integral component of membrane			49.232	-1.56904	0.000748262	0.00796081	8.861	8.817	3.42	18.528	18.259	23.223
TRINITY_DN155018_c0_g1	Picea sitchensis	OIT31408.1l-ascorbate oxidase-like protein	P:GO:0055114; F:GO:0005507; F:GO:0052716	P:oxidation-reduction process; F:copper ion binding; F:hydroquinone:oxygen oxidoreductase activity	EC:1.10.3; EC:1.10.3.2	Acting on diphenols and related substances as donors; Laccase	11.6497	-3.52145	0.000819349	0.00863523	0.608	1.836	0.498	5.854	5.756	7.481
TRINITY_DN210793_c2_g5	Picea sitchensis	ABK23358.1unknown	P:GO:0016311; F:GO:0003993	P:dephosphorylation; F:acid phosphatase activity	EC:3.1.3.2	Acid phosphatase	97.3633	-1.25542	0.000820562	0.00864208	21.305	17.432	22.436	31.005	59.589	38.88
TRINITY_DN214889_c2_g3							179.857	-1.9451	0.000821026	0.00864208	80.432	229.926	18.46	172.631	186.599	208.632
TRINITY_DN214548_c0_g1							38.2193	-1.56165	0.000838066	0.00880493	12.039	16.034	7.692	26.718	30.738	28.637
TRINITY_DN196204_c0_g1	Elaeis guineensis	XP_010923968.1 glutamate receptor 3.4	F:GO:0038023; C:GO:0016020	F:signaling receptor activity; C:membrane			73.4183	-1.0233	0.000845571	0.00887269	5.076	4.387	4.55	10.7	9.153	10.218
TRINITY_DN210309_c2_g7	Picea abies	ANB66414.1transcription factor MYB31	P:GO:0030154; F:GO:0000976; C:GO:0005634	P:cell differentiation; F:transcription regulatory region sequence-specific DNA binding; C:nucleus			40.1122	-1.51213	0.000855362	0.00895795	5.076	5.38	4.052	15.426	12.609	11.376
TRINITY_DN175539_c0_g1							13.6112	-5.38508	0.000855825	0.00895795	0.032	1.43	0	0.592	0.484	1.544
TRINITY_DN210137_c1_g1	Musa acuminata subsp. malaccensis	XP_009412280.1 probable xyloglucan endotransglucosylase/hydrolase protein 7	P:GO:0009739; P:GO:0009741; P:GO:0010411; P:GO:0042546; P:GO:0071555; F:GO:0004553; F:GO:0016762; C:GO:0005618; C:GO:0016021; C:GO:0048046	P:response to gibberellin; P:response to brassinosteroid; P:xyloglucan metabolic process; P:cell wall biogenesis; P:cell wall organization; F:hydrolase activity, hydrolyzing O-glycosyl compounds; F:xyloglucan:xyloglucosyl transferase activity; C:cell wall; C:integral component of membrane; C:apoplast	EC:2.4.1.207	Xyloglucan:xyloglucosyl transferase	557.148	-2.40927	0.000864509	0.00903199	7.294	76.08	24.629	79.496	56.511	115.198
TRINITY_DN130551_c0_g2							38.3669	-3.4025	0.000914441	0.00950646	0	15.286	2.395	10.339	7.702	18.702
TRINITY_DN189934_c0_g1	Picea sitchensis	KMZ74711.1Calcium-binding EF hand family protein	F:GO:0005509; C:GO:0016021	F:calcium ion binding; C:integral component of membrane			108.6	-1.13419	0.000921036	0.00956321	11.058	7.558	7.98	19.866	17.174	27.212
TRINITY_DN138089_c0_g2	Picea sitchensis	ABK25311.1unknown					12.7619	-4.32485	0.000924614	0.00958262	0.501	2.274	0	4.868	3.715	9.325
TRINITY_DN208315_c5_g1							7.31381	-5.91999	0.000936876	0.0096918	0	2.605	0	1.403	0.625	2.428
TRINITY_DN203345_c0_g1	Picea sitchensis	RWR87775.1FK506-binding protein 4-like protein	P:GO:0030001; F:GO:0046872	P:metal ion transport; F:metal ion binding			23.3078	-2.71603	0.000949561	0.00979998	0.789	1.409	0.929	2.883	9.047	4.126
TRINITY_DN211138_c0_g1	Picea abies	AAX92713.1zinc finger family protein	F:GO:0008168; C:GO:0016020; C:GO:0016021	F:methyltransferase activity; C:membrane; C:integral component of membrane			84.3675	-1.2049	0.000966893	0.00993049	2.858	6.458	4.502	8.541	6.936	10.295
TRINITY_DN188239_c1_g1	Pinus taeda	AFG47234.1hypothetical protein 0_17559_01, partial	C:GO:0016021	C:integral component of membrane			43.9862	-1.72325	0.000980701	0.0100464	2.922	5.615	1.514	5.241	9.778	8.21
TRINITY_DN199172_c0_g1	Picea sitchensis	XP_009405920.1 potassium channel AKT2	P:GO:0071805; F:GO:0005249; C:GO:0016021	P:potassium ion transmembrane transport; F:voltage-gated potassium channel activity; C:integral component of membrane			162.508	-1.12742	0.000996508	0.0101773	3.21	11.465	6.141	9.615	9.625	12.319
TRINITY_DN205877_c0_g1							206.485	-1.38164	0.00100503	0.0102271	22.713	64.455	8.363	36.443	33.746	47.064
TRINITY_DN212326_c0_g2	Picea sitchensis	XP_010246626.2 probable disease resistance protein At1g61300	F:GO:0043531	F:ADP binding			45.6404	-1.49674	0.00101109	0.0102702	2.133	2.818	1.763	4.824	7.655	4.658
TRINITY_DN169938_c0_g2	Vitis vinifera	XP_002281101.1 lachrymatory-factor synthase	P:GO:0009738; P:GO:0032515; P:GO:0080163; F:GO:0004864; F:GO:0010427; F:GO:0038023; C:GO:0005634; C:GO:0005737	P:abscisic acid-activated signaling pathway; P:negative regulation of phosphoprotein phosphatase activity; P:regulation of protein serine/threonine phosphatase activity; F:protein phosphatase inhibitor activity; F:abscisic acid binding; F:signaling receptor activity; C:nucleus; C:cytoplasm			101.085	-1.03996	0.00101565	0.0103102	5.364	9.554	7.597	15.656	11.795	13.04
TRINITY_DN209879_c1_g1	Picea sitchensis	XP_006427468.1probable disease resistance protein At5g63020	F:GO:0043531	F:ADP binding			26.6781	-2.61429	0.0010309	0.0104399	0.768	9.597	3.928	12.191	13.505	8.287
TRINITY_DN203452_c2_g1	Picea sitchensis	XP_020674585.1protein PIN-LIKES 7-like isoform X1	P:GO:0055085; C:GO:0016021	P:transmembrane transport; C:integral component of membrane			40.4556	-1.81287	0.00103643	0.0104755	19.204	24.744	8.737	54.653	41.389	47.639
TRINITY_DN209977_c0_g1	Picea sitchensis	ASU44000.1UDP-glycosyltransferase UGT7	F:GO:0016757	F:transferase activity, transferring glycosyl groups			45.6775	-1.60505	0.00106562	0.0107187	10.684	11.091	5.968	23.604	20.677	32.128
TRINITY_DN211680_c3_g2	Nicotiana attenuata	XP_019246521.1PREDICTED: uncharacterized protein LOC109226182					65.6283	-1.95473	0.00110356	0.0110339	0.97	1.548	2.347	4.199	5.65	8.896
TRINITY_DN194298_c0_g1	Gossypium arboreum/Gossypium hirsutum	KHG20809.1 Auxin-induced 15A	P:GO:0009733	P:response to auxin			6.21946	-5.68652	0.00111381	0.0110992	0	0.299	0	1.272	1.71	2.291
TRINITY_DN213243_c0_g2	Picea sitchensis	ASU43994.1UDP-glycosyltransferase UGT3	F:GO:0008194	F:UDP-glycosyltransferase activity			104.477	-1.9113	0.0011153	0.0111074	4.916	1.249	7.041	37.056	29.912	9.703
TRINITY_DN174113_c0_g1	Picea sitchensis	PWA45342.1cytochrome P450	P:GO:0055114; F:GO:0004497; F:GO:0005506; F:GO:0016705; F:GO:0020037; C:GO:0016021	P:oxidation-reduction process; F:monooxygenase activity; F:iron ion binding; F:oxidoreductase activity, acting on paired donors, with incorporation or reduction of molecular oxygen; F:heme binding; C:integral component of membrane			21.2947	-2.46691	0.00112933	0.0112272	1.77	4.217	1.044	8.069	4.635	11.359
TRINITY_DN212236_c0_g1							144.601	-1.07231	0.00116715	0.0115622	5.097	11.604	7.731	20.206	13.989	19.38
TRINITY_DN208287_c3_g1	Picea sitchensis	ABR17766.1unknown	P:GO:0045490; F:GO:0030570; F:GO:0046872	P:pectin catabolic process; F:pectate lyase activity; F:metal ion binding	EC:4.2.2.2	Pectate lyase	19.7196	-2.20289	0.00117271	0.0115969	2.666	5.06	1.447	10.152	7.797	11.247
TRINITY_DN338352_c0_g1	Picea sitchensis	AAV44194.1 unknow protein					12.218	-5.224	0.00119489	0.0117783	0.096	0.299	0	3.289	1.026	2.428
TRINITY_DN213841_c1_g6	Picea sitchensis	XP_020870928.1probable polyketide synthase 38 isoform X1					105.663	-1.07321	0.00119863	0.0118046	12.295	16.503	9.704	24.01	21.172	32.549
TRINITY_DN203320_c2_g6	Fragaria vesca subsp. vesca	XP_011461273.1 histone H2B-like	F:GO:0003677; F:GO:0046982; C:GO:0000786; C:GO:0005634	F:DNA binding; F:protein heterodimerization activity; C:nucleosome; C:nucleus			67.389	-1.26647	0.00120027	0.0118139	36.383	77.457	26.746	68.346	64.85	81.037
TRINITY_DN201846_c0_g1							20.8281	-3.61786	0.00121888	0.0119675	0.416	2.53	0.259	3.739	1.427	10.175
TRINITY_DN204945_c0_g1	Picea sitchensis	ADE76756.1unknown	P:GO:0022900; F:GO:0009055	P:electron transport chain; F:electron transfer activity			41.322	-1.8024	0.00121943	0.0119675	2.335	3.267	0.766	5.098	5.957	6.992
TRINITY_DN204775_c0_g1	Picea sitchensis	XP_020274424.1 TPRXL					10.4089	-3.93915	0.0012436	0.0121702	0.16	0.31	0.239	3.212	2.63	3.063
TRINITY_DN214202_c2_g6	Fragaria x ananassa	AHC04401.1beta-glucosidase 1	P:GO:0005975; F:GO:0004565; F:GO:0033907; F:GO:0042973; F:GO:0080079; F:GO:0080083; F:GO:0102483; C:GO:0005576	P:carbohydrate metabolic process; F:beta-galactosidase activity; F:beta-D-fucosidase activity; F:glucan endo-1,3-beta-D-glucosidase activity; F:cellobiose glucosidase activity; F:beta-gentiobiose beta-glucosidase activity; F:scopolin beta-glucosidase activity; C:extracellular region	EC:3.2.1.21; EC:3.2.1.23; EC:3.2.1.39; EC:3.2.1.38	Beta-glucosidase; Beta-galactosidase; Glucan endo-1,3-beta-D-glucosidase; Beta-D-fucosidase	59.0219	-1.2293	0.00124901	0.012215	7.454	13.397	5.805	13.726	14.048	19.5
TRINITY_DN206719_c2_g6	Cinnamomum micranthum f. kanehirae	RWR80670.1NAC domain-containing protein 7	P:GO:0006355; F:GO:0003677; C:GO:0005634	P:regulation of transcription, DNA-templated; F:DNA binding; C:nucleus			50.7024	-1.18763	0.00125533	0.0122626	1.855	1.345	2.309	3.684	3.704	5.165
TRINITY_DN120926_c0_g1	Selaginella moellendorffii	EOY11043.1 1-phosphatidylinositol-4,5-bisphosphate phosphodiesterase epsilon-1					68.0032	-1.15597	0.00126997	0.012384	2.474	4.099	3.525	6.414	5.898	8.021
TRINITY_DN190754_c1_g1	Cinnamomum micranthum f. kanehirae	RWR74434.1GDP-mannose transporter GONST3-like protein	P:GO:0006376; P:GO:0015783; F:GO:0003729; F:GO:0005457; F:GO:0015297; C:GO:0005685; C:GO:0005794; C:GO:0016021	P:mRNA splice site selection; P:GDP-fucose transmembrane transport; F:mRNA binding; F:GDP-fucose transmembrane transporter activity; F:antiporter activity; C:U1 snRNP; C:Golgi apparatus; C:integral component of membrane			80.9728	-1.1799	0.00127593	0.0124277	2.57	2.594	2.088	4.605	4.553	7.223
TRINITY_DN214603_c0_g1	Cinnamomum micranthum f. kanehirae	RWR75387.1glutamate receptor 2.8	F:GO:0038023; C:GO:0016020	F:signaling receptor activity; C:membrane			30.0901	-1.75925	0.00128829	0.0125264	0.661	1.174	0.757	3.607	4.199	4.676
TRINITY_DN200794_c1_g3							24.2818	-1.88755	0.00129926	0.0126185	2.783	5.113	3.248	7.817	11.512	13.323
TRINITY_DN212385_c0_g3	Asparagus officinalis	XP_020273598.1probable proline transporter 2 isoform X1	C:GO:0005886	C:plasma membrane			257.974	-1.00268	0.00132697	0.0128284	12.081	8.337	6.141	17.903	17.469	20.916
TRINITY_DN210010_c0_g1	Manihot esculenta	XP_021615181.1gamma-glutamyl peptidase 5-like	C:GO:0005829	C:cytosol			156.625	-1.29191	0.0013408	0.012925	5.897	35.686	14.896	25.172	23.496	25.462
TRINITY_DN213602_c1_g6							69.7027	-1.02141	0.00135894	0.013062	17.616	26.794	25.338	38.493	44.255	39.472
TRINITY_DN204985_c1_g1							20.9992	-2.15425	0.00136805	0.0131275	1.066	5.54	0.718	5.032	2.89	3.955
TRINITY_DN209442_c0_g3	Gossypium barbadense/Gossypium hirsutum	XP_016737370.1 peroxidase 66	P:GO:0006979; P:GO:0042744; P:GO:0055114; P:GO:0098869; F:GO:0004601; F:GO:0020037; F:GO:0046872; C:GO:0005576; C:GO:0009505; C:GO:0009506	P:response to oxidative stress; P:hydrogen peroxide catabolic process; P:oxidation-reduction process; P:cellular oxidant detoxification; F:peroxidase activity; F:heme binding; F:metal ion binding; C:extracellular region; C:plant-type cell wall; C:plasmodesma	EC:1.11.1.7	Peroxidase	41.2442	-1.6544	0.00140141	0.013417	1.983	2.85	1.063	5.986	3.515	5.13
TRINITY_DN199782_c0_g1	Picea sitchensis	XP_022769734.1transcription factor CPC-like	P:GO:0030154; F:GO:0000976; C:GO:0005634; C:GO:0016021	P:cell differentiation; F:transcription regulatory region sequence-specific DNA binding; C:nucleus; C:integral component of membrane			91.2356	-1.06237	0.00142519	0.0136292	5.566	7.141	8.066	14.866	11.901	16.961
TRINITY_DN214195_c0_g6	Solanum lycopersicum	XP_004243217.1subtilisin-like protease SBT5.3	F:GO:0004252; C:GO:0005615; C:GO:0016020	F:serine-type endopeptidase activity; C:extracellular space; C:membrane	EC:3.4.21	Acting on peptide bonds (peptidases)	5.94979	-5.61919	0.00146491	0.0139393	0	2.957	0	1.842	1.286	1.235
TRINITY_DN119508_c0_g1							5.85931	-5.60027	0.0014912	0.0141002	0	0.117	0	0.855	1.439	1.527
TRINITY_DN208439_c1_g2	Picea sitchensis	RWR79381.14-coumarate--CoA ligase-like protein 7	P:GO:0009695; F:GO:0003824; F:GO:0004321; F:GO:0016405; F:GO:0016874; C:GO:0005777; C:GO:0016020; C:GO:0016021	P:jasmonic acid biosynthetic process; F:catalytic activity; F:fatty-acyl-CoA synthase activity; F:CoA-ligase activity; F:ligase activity; C:peroxisome; C:membrane; C:integral component of membrane			100.066	-1.18006	0.00151193	0.0142722	10.45	15.297	6.016	18.079	12.585	22.254
TRINITY_DN212521_c1_g2	Pinus taeda/Pinus radiata	ACI87755.1putative early light-induced protein	C:GO:0016021	C:integral component of membrane			180.061	-1.23446	0.00152097	0.0143494	19.812	26.292	7.97	35.061	32.661	32.857
TRINITY_DN203284_c1_g1	Pinus taeda	ABR15470.1sucrose synthase	P:GO:0005985; F:GO:0016157	P:sucrose metabolic process; F:sucrose synthase activity	EC:2.4.1.13	Sucrose synthase	36.3049	-1.90464	0.00157007	0.0147713	4.724	41.226	13.709	25.863	40.705	22.365
TRINITY_DN190225_c0_g2							6.07755	-5.65174	0.00157511	0.0148104	0	1.014	0	1.184	0.531	1.218
TRINITY_DN211177_c1_g2	Picea sitchensis	XP_002272418.1 small heat shock protein, chloroplastic	P:GO:0006355; P:GO:0009408; P:GO:0009416; P:GO:0009658; F:GO:0043621; C:GO:0000427; C:GO:0042644; C:GO:0101031	P:regulation of transcription, DNA-templated; P:response to heat; P:response to light stimulus; P:chloroplast organization; F:protein self-association; C:plastid-encoded plastid RNA polymerase complex; C:chloroplast nucleoid; C:chaperone complex			113.13	-1.01247	0.00158872	0.0149134	12.199	9.928	7.041	17.3	16.997	20.984
TRINITY_DN191822_c0_g1	Populus tomentosa	APR64231.1alpha-expansin 8 precursor family protein	C:GO:0110165	C:cellular anatomical entity			93.3094	-1.04798	0.00159091	0.0149177	9.49	3.854	6.591	16.39	19.438	14.661
TRINITY_DN210540_c1_g4	Cicer arietinum	XP_016508381.1 lipase-like	F:GO:0016787; C:GO:0016021	F:hydrolase activity; C:integral component of membrane			8.99233	-6.21716	0.00159183	0.0149177	0	14.806	0	12.674	1.404	15.536
TRINITY_DN197375_c2_g1							66.836	-1.15566	0.00160525	0.01501	6.664	10.472	5.288	12.158	12.043	17.407
TRINITY_DN213931_c1_g2	Pinus tabuliformis	XP_006854500.2patatin-like protein 6	P:GO:0016042; F:GO:0016787	P:lipid catabolic process; F:hydrolase activity			78.3912	-1.14697	0.00163671	0.0152449	3.615	4.409	2.031	6.951	5.768	6.803
TRINITY_DN70488_c0_g2							6.48367	-5.7441	0.00165141	0.0153424	0	0.246	0	1.491	0.46	1.081
TRINITY_DN213190_c1_g1	Pinus tabuliformis	RLN19241.1benzyl alcohol O-benzoyltransferase	F:GO:0016747	F:transferase activity, transferring acyl groups other than amino-acyl groups			38.1954	-1.62098	0.00166884	0.0154671	2.175	10.237	4.014	11.545	9.271	8.356
TRINITY_DN211358_c0_g2	Nicotiana sylvestris	AFN85535.1PRp27-like protein	P:GO:0006508; F:GO:0008233	P:proteolysis; F:peptidase activity			32.5539	-2.50946	0.00171033	0.0158342	0.992	2.082	1.657	10.13	4.612	2.934
TRINITY_DN196531_c0_g1	Fragaria vesca subsp. vesca	XP_004287305.1 EPIDERMAL PATTERNING FACTOR-like protein 8	P:GO:0010052; P:GO:0010374; C:GO:0016020; C:GO:0016021	P:guard cell differentiation; P:stomatal complex development; C:membrane; C:integral component of membrane			80.1487	-1.25759	0.00173187	0.0159897	2.762	4.409	3.918	6.063	10.509	7.712
TRINITY_DN215465_c2_g5	Amborella trichopoda	XP_006856596.1oligopeptide transporter 4 isoform X1	P:GO:0035672; F:GO:0035673; C:GO:0005887	P:oligopeptide transmembrane transport; F:oligopeptide transmembrane transporter activity; C:integral component of plasma membrane			47.5695	-1.32877	0.00173943	0.0160418	12.252	17.581	11.908	27.946	23.343	36.426
TRINITY_DN214478_c0_g2	Picea sitchensis	ABR17724.1unknown	P:GO:0006629; C:GO:0016021	P:lipid metabolic process; C:integral component of membrane			74.7007	-1.84988	0.00177611	0.0163353	2.058	5.572	4.378	12.959	5.497	16.695
TRINITY_DN211902_c0_g1	Picea sitchensis	ABK23754.1unknown					45.9531	-2.5994	0.00177788	0.0163409	2.975	3.363	0.268	8.266	12.703	7.352
TRINITY_DN202072_c0_g1	Picea sitchensis	XP_006854199.1protein BREVIS RADIX					45.7919	-1.23229	0.00180828	0.0165859	2.389	4.056	1.753	4.67	5.473	4.821
TRINITY_DN210985_c2_g3	Rosa chinensis	PRQ42351.1putative RNA-directed DNA polymerase	P:GO:0006278; P:GO:0015074; F:GO:0003676; F:GO:0003964; F:GO:0008270; F:GO:0016740; F:GO:0016779	P:RNA-dependent DNA biosynthetic process; P:DNA integration; F:nucleic acid binding; F:RNA-directed DNA polymerase activity; F:zinc ion binding; F:transferase activity; F:nucleotidyltransferase activity			37.2203	-1.45749	0.00181574	0.0166271	1.024	1.953	3.152	2.741	3.149	2.136
TRINITY_DN212339_c4_g2							16.0951	-2.68455	0.00182353	0.0166895	0.384	3.267	0.431	3.41	1.404	3.157
TRINITY_DN162511_c0_g3							9.40325	-4.83689	0.00193398	0.0175208	0.075	0.235	0	1.502	1.097	1.441
TRINITY_DN214606_c1_g1	Eucalyptus grandis	XP_010058055.1 polygalacturonase QRT3	F:GO:0004650; F:GO:0016829; C:GO:0016021	F:polygalacturonase activity; F:lyase activity; C:integral component of membrane	EC:3.2.1.15	Endo-polygalacturonase	52.2851	-1.56352	0.00193856	0.0175419	1.887	2.124	0.632	3.739	3.704	4.324
TRINITY_DN193831_c0_g2	Picea abies	AAX92685.1probable aquaporin	P:GO:0006833; P:GO:0055085; F:GO:0015250; C:GO:0005886; C:GO:0016021	P:water transport; P:transmembrane transport; F:water channel activity; C:plasma membrane; C:integral component of membrane			23.2744	-1.77012	0.00195727	0.0176827	1.525	3.17	1.15	4.089	5.284	4.693
TRINITY_DN195222_c0_g1	Picea sitchensis	ABK23187.1unknown	P:GO:0080143; C:GO:0016021	P:regulation of amino acid export; C:integral component of membrane			30.4919	-1.54668	0.0020162	0.0181469	2.367	7.398	2.941	6.194	7.643	8.871
TRINITY_DN204755_c1_g3	Picea sitchensis	XP_020528350.1 probable E3 ubiquitin-protein ligase RHC1A	P:GO:0016567; F:GO:0016874; F:GO:0061630	P:protein ubiquitination; F:ligase activity; F:ubiquitin protein ligase activity			25.8276	-1.74127	0.00203677	0.0182853	0.789	0.843	0.757	2.883	1.982	3.148
TRINITY_DN139953_c0_g1	Picea sitchensis	XP_011009110.1 flavonoid 3',5'-hydroxylase 2-like	P:GO:0055114; F:GO:0004497; F:GO:0005506; F:GO:0016705; F:GO:0020037; C:GO:0016021	P:oxidation-reduction process; F:monooxygenase activity; F:iron ion binding; F:oxidoreductase activity, acting on paired donors, with incorporation or reduction of molecular oxygen; F:heme binding; C:integral component of membrane			23.5746	-1.934	0.00203701	0.0182853	8.563	19.93	5.039	21.708	22.611	31.579
TRINITY_DN214943_c2_g2							13.9161	-2.4953	0.00205032	0.018346	4.319	11.102	3.679	17.136	16.678	22.365
TRINITY_DN206434_c0_g1							29.8208	-1.86146	0.00220152	0.019502	5.246	9.906	4.071	18.408	21.125	10.458
TRINITY_DN209575_c2_g3	Picea sitchensis	XP_002304763.2putative UPF0481 protein At3g02645	C:GO:0016021	C:integral component of membrane			296.548	-1.0498	0.00224121	0.0198119	16.133	38.504	37.303	58.6	51.38	54.331
TRINITY_DN213873_c2_g1	Picea sitchensis	NP_001267500.1alpha-galactosidase-like precursor	P:GO:0005975; F:GO:0052692; C:GO:0009505	P:carbohydrate metabolic process; F:raffinose alpha-galactosidase activity; C:plant-type cell wall	EC:3.2.1.22	Alpha-galactosidase	9.57697	-4.86647	0.00232999	0.0204336	0.256	0.758	0	5.427	2.654	5.456
TRINITY_DN206565_c0_g1							116.169	-8.32874	0.00233952	0.0204866	0	0.374	0.287	18.462	68.388	0.24
TRINITY_DN190200_c0_g1	Picea sitchensis	ABK25738.1unknown					71.4525	-1.2859	0.00234677	0.020508	2.634	5.252	4.809	7.06	9.507	10.887
TRINITY_DN213115_c1_g4	Picea sitchensis	XP_027165921.1UPF0481 protein At3g47200-like	C:GO:0016020	C:membrane			203.568	-1.10131	0.00235535	0.0205724	11.836	23.346	25.769	42.264	33.97	47.407
TRINITY_DN142726_c0_g1	Physcomitrella patens	XP_024376780.1ABC transporter C family member 10-like	P:GO:0055085; F:GO:0005524; F:GO:0016887; F:GO:0042626; C:GO:0000325; C:GO:0005774; C:GO:0016021	P:transmembrane transport; F:ATP binding; F:ATPase activity; F:ATPase-coupled transmembrane transporter activity; C:plant-type vacuole; C:vacuolar membrane; C:integral component of membrane	EC:3.6.1.3; EC:3.6.1.15	Adenosinetriphosphatase; Nucleoside-triphosphate phosphatase	28.8223	-1.96929	0.00237427	0.0206958	14.609	10.397	4.771	40.543	39.738	32.403
TRINITY_DN213376_c2_g2	Picea sitchensis	RWR79381.14-coumarate--CoA ligase-like protein 7	P:GO:0009695; P:GO:0055114; F:GO:0003987; F:GO:0004321; F:GO:0005524; F:GO:0016207; F:GO:0016491; F:GO:0016887; C:GO:0005777; C:GO:0016021	P:jasmonic acid biosynthetic process; P:oxidation-reduction process; F:acetate-CoA ligase activity; F:fatty-acyl-CoA synthase activity; F:ATP binding; F:4-coumarate-CoA ligase activity; F:oxidoreductase activity; F:ATPase activity; C:peroxisome; C:integral component of membrane	EC:3.6.1.3; EC:6.2.1.12; EC:2.3.1.86; EC:6.2.1.1; EC:3.6.1.15	Adenosinetriphosphatase; 4-coumarate--CoA ligase; Fatty-acyl-CoA synthase system; Acetate--CoA ligase; Nucleoside-triphosphate phosphatase	61.1147	-1.03135	0.00242813	0.0210659	7.571	13.226	7.788	16.906	13.541	16.901
TRINITY_DN208842_c4_g1	Picea sitchensis	XP_021601643.1putative F-box protein PP2-B12					16.921	-2.19681	0.00254201	0.02184	0.608	2.007	0.642	2.489	3.656	2.333
TRINITY_DN196537_c0_g2							5.80382	-5.58259	0.00258578	0.0221595	0	3.768	0	4.418	2.489	1.081
TRINITY_DN205037_c3_g1	Populus tomentosa	APR63887.1actin family protein 8	F:GO:0005524; C:GO:0005737; C:GO:0005856	F:ATP binding; C:cytoplasm; C:cytoskeleton			937.235	-1.00186	0.00258773	0.0221649	631.92	744.859	356.144	993.903	823.325	978.353
TRINITY_DN207635_c4_g11							38.1112	-1.2984	0.00263718	0.0224855	1.152	1.26	1.59	3.563	3.244	3.406
TRINITY_DN215414_c6_g6							5.55466	-5.52099	0.00265181	0.0225703	0	10.878	0	9.407	3.385	7.121
TRINITY_DN213617_c3_g1							375.924	-1.2507	0.00265248	0.0225703	262.196	284.944	115.636	391.078	431.113	464.002
TRINITY_DN196018_c0_g1							26.4029	-1.76914	0.00267881	0.0227348	2.474	2.626	1.178	5.646	5.803	8.09
TRINITY_DN213428_c0_g3	Vitis vinifera	XP_010653330.1 mannan endo-1,4-beta-mannosidase 6 isoform X2	P:GO:0005975; F:GO:0016985	P:carbohydrate metabolic process; F:mannan endo-1,4-beta-mannosidase activity	EC:3.2.1.25; EC:3.2.1.78	Beta-mannosidase; Mannan endo-1,4-beta-mannosidase	60.8852	-1.42337	0.00271181	0.0229373	2.229	1.804	0.9	4.649	3.48	5.062
TRINITY_DN202181_c1_g1							33.5144	-1.46496	0.00272821	0.0230299	2.143	2.509	1.533	5.58	4.152	6.031
TRINITY_DN316393_c0_g1	Pinus banksiana	AFU73860.1alpha terpineol synthase	F:GO:0000287; F:GO:0010333; C:GO:0009507	F:magnesium ion binding; F:terpene synthase activity; C:chloroplast			5.12079	-5.40614	0.00275722	0.0231802	0	1.302	0	2.083	3.421	3.989
TRINITY_DN210772_c0_g1	Brachypodium distachyon	XP_003573433.1putative UPF0481 protein At3g02645	C:GO:0016020; C:GO:0016021	C:membrane; C:integral component of membrane			9.21728	-3.83193	0.00279313	0.0234003	0.213	2.124	0	1.864	2.512	1.716
TRINITY_DN197159_c0_g1	Picea sitchensis	ABK25758.1unknown	C:GO:0016020; C:GO:0016021	C:membrane; C:integral component of membrane			10.246	-3.82421	0.00282443	0.0236153	0	0.512	0.22	0.954	1.533	1.587
TRINITY_DN208733_c1_g8	Pinus taeda/Pinus radiata	AEW09087.1hypothetical protein CL3702Contig1_01, partial	F:GO:0003824	F:catalytic activity			69.4594	-1.14639	0.00282481	0.0236153	3.775	3.715	2.96	6.063	7.136	10.269
TRINITY_DN212691_c1_g3							109.865	-1.04138	0.00285171	0.0238199	6.526	7.323	9.905	14.066	15.805	22.34
TRINITY_DN210751_c0_g2	Trema orientale	PON92411.1Mitogen-activated protein kinase kinase kinase	P:GO:0006464; P:GO:0016310; F:GO:0016301; F:GO:0140096	P:cellular protein modification process; P:phosphorylation; F:kinase activity; F:catalytic activity, acting on a protein			9.65812	-3.2342	0.00286578	0.0238782	0.267	0.128	0.201	2.412	1.923	2.436
TRINITY_DN211166_c3_g1	Pinus taeda/Pinus radiata	AEW08292.1hypothetical protein 2_5882_01, partial	P:GO:0006355; F:GO:0003690	P:regulation of transcription, DNA-templated; F:double-stranded DNA binding			55.1671	-1.25166	0.0029086	0.0242229	3.636	10.162	6.303	9.856	11.312	14.258
TRINITY_DN210577_c0_g1	Musa acuminata subsp. malaccensis	CAC83360.1putative hydrophobic LEA-like protein	C:GO:0016021	C:integral component of membrane			165.518	-1.1135	0.00292624	0.0243429	16.773	12.447	7.443	28.933	22.847	32.729
TRINITY_DN206979_c0_g1							63.6626	-1.32387	0.00296509	0.0245719	1.482	1.388	1.6	4.002	2.536	5.413
TRINITY_DN208397_c0_g1							11.9843	-3.4095	0.00300116	0.0248341	0	7.408	1.322	5.273	4.6	7.575
TRINITY_DN191542_c0_g1	Cajanus cajan	KYP77007.1Retrovirus-related Pol polyprotein from transposon TNT 1-94	P:GO:0015074; P:GO:0015696; P:GO:0055114; P:GO:0072488; F:GO:0003676; F:GO:0004491; F:GO:0008270; F:GO:0008519; F:GO:0016491; C:GO:0016020; C:GO:0016021	P:DNA integration; P:ammonium transport; P:oxidation-reduction process; P:ammonium transmembrane transport; F:nucleic acid binding; F:methylmalonate-semialdehyde dehydrogenase (acylating) activity; F:zinc ion binding; F:ammonium transmembrane transporter activity; F:oxidoreductase activity; C:membrane; C:integral component of membrane			21.8737	-1.87018	0.00302214	0.0249341	0.192	0.683	0.422	0.987	1.215	1.201
TRINITY_DN214507_c1_g2	Picea sitchensis	ABR18046.1unknown	F:GO:0016740	F:transferase activity			27.3285	-1.77678	0.00304233	0.0250268	3.743	6.661	1.303	8.694	9.141	9.385
TRINITY_DN172601_c0_g3	Carthamus tinctorius/Catharanthus roseus	AEK98798.1 ubiquitin	P:GO:0016567; P:GO:0019941; F:GO:0031386; F:GO:0031625; C:GO:0005634; C:GO:0005737	P:protein ubiquitination; P:modification-dependent protein catabolic process; F:protein tag; F:ubiquitin protein ligase binding; C:nucleus; C:cytoplasm			10.0626	-3.23107	0.0030516	0.0250789	0.661	8.092	2.874	10.185	13.317	15.794
TRINITY_DN212132_c2_g1							13.7349	-4.34278	0.0030699	0.02518	0.032	0.107	0.048	0.998	1.427	0.137
TRINITY_DN205743_c1_g1	Funaria hygrometrica	AEB39778.1pentatricopeptide repeat protein 77	F:GO:0008270	F:zinc ion binding			42.5069	-1.2582	0.00308736	0.025274	0.714	1.591	1.035	1.864	2.324	2.205
TRINITY_DN213178_c3_g2	Pinus tabuliformis	XP_015635545.1beta-D-xylosidase 4	P:GO:0031222; P:GO:0045493; F:GO:0009044; F:GO:0046556; C:GO:0009505	P:arabinan catabolic process; P:xylan catabolic process; F:xylan 1,4-beta-xylosidase activity; F:alpha-L-arabinofuranosidase activity; C:plant-type cell wall	EC:3.2.1.55; EC:3.2.1.37	Non-reducing end alpha-L-arabinofuranosidase; Xylan 1,4-beta-xylosidase	51.4479	-1.19334	0.00317738	0.0258976	12.849	21.499	14.408	28.976	24.074	38.863
TRINITY_DN211868_c3_g1	Pinus taeda	ALH22540.1expansin A4	P:GO:0009664; C:GO:0005576; C:GO:0005618; C:GO:0016021	P:plant-type cell wall organization; C:extracellular region; C:cell wall; C:integral component of membrane			449.672	-1.01767	0.00318823	0.0259609	306.672	301.767	173.076	459.336	413.962	500.102
TRINITY_DN210571_c1_g2	Picea sitchensis	AAX92683.1probable aquaporin	P:GO:0055085; F:GO:0015267; C:GO:0016021	P:transmembrane transport; F:channel activity; C:integral component of membrane			79.0198	-1.08754	0.00319293	0.0259865	16.037	14.71	9.589	26.06	28.155	28.585
TRINITY_DN214787_c0_g1							86.8142	-1.06778	0.00320691	0.0260877	1.685	2.551	1.514	3.3	8.752	4.976
TRINITY_DN215327_c0_g1	Pinus tabuliformis	AGC13150.1phi class glutathione S-transferase	F:GO:0004364	F:glutathione transferase activity	EC:2.5.1.18	Glutathione transferase	245.462	-1.01146	0.00323759	0.0262992	48.389	47.129	23.144	71.284	67.798	79.947
TRINITY_DN211925_c0_g4	Pinus taeda	XP_009610181.1 UDP-glycosyltransferase 86A1-like	F:GO:0008194	F:UDP-glycosyltransferase activity			373.554	-1.15454	0.0032401	0.0263069	21.838	15.617	9.11	41.036	29.629	31.656
TRINITY_DN199690_c0_g2	Nelumbo nucifera	XP_010244565.1 acid phosphatase 1	F:GO:0016787	F:hydrolase activity			36.1682	-1.57006	0.00329206	0.0266388	2.389	2.071	1.389	4.594	4.883	7.91
TRINITY_DN206018_c0_g2	Arachis ipaensis	XP_016168642.1ABC transporter C family member 10	P:GO:0055085; F:GO:0000166; F:GO:0016491; F:GO:0042626; C:GO:0000325; C:GO:0005774	P:transmembrane transport; F:nucleotide binding; F:oxidoreductase activity; F:ATPase-coupled transmembrane transporter activity; C:plant-type vacuole; C:vacuolar membrane			109.056	-1.05517	0.00330326	0.0266909	20.974	23.623	27.867	44.281	33.663	62.515
TRINITY_DN200380_c0_g1	Picea sitchensis	XP_009407567.1 probable proline transporter 2	C:GO:0005886; C:GO:0016021	C:plasma membrane; C:integral component of membrane			73.4192	-1.28044	0.00332985	0.0268413	4.628	23.122	8.478	19.383	11.63	17.192
TRINITY_DN200139_c0_g1	Picea sitchensis	ABR18096.1unknown	F:GO:0043531	F:ADP binding			42.9206	-2.98072	0.00342802	0.0274225	0	10.088	3.516	8.672	11.736	8.922
TRINITY_DN206922_c0_g3	Coffea canephora	XP_019242630.1 mannan endo-1,4-beta-mannosidase 5-like	P:GO:0005975; F:GO:0016985; C:GO:0005576	P:carbohydrate metabolic process; F:mannan endo-1,4-beta-mannosidase activity; C:extracellular region	EC:3.2.1.25; EC:3.2.1.78	Beta-mannosidase; Mannan endo-1,4-beta-mannosidase	31.0864	-1.48027	0.003531	0.0281127	13.66	23.687	17.837	28.976	39.054	47.69
TRINITY_DN195033_c0_g1	Nelumbo nucifera	XP_010263393.1PREDICTED: uncharacterized protein LOC104601654	C:GO:0110165	C:cellular anatomical entity			37.3907	-1.56267	0.00360025	0.0286043	1.216	1.164	0.46	2.171	2.689	2.943
TRINITY_DN203982_c1_g1	Cucurbita moschata	XP_022959986.1sulfate transporter 3.1-like	P:GO:1902358; F:GO:0008271; F:GO:0015301; C:GO:0005887; C:GO:0009507	P:sulfate transmembrane transport; F:secondary active sulfate transmembrane transporter activity; F:anion:anion antiporter activity; C:integral component of plasma membrane; C:chloroplast			26.1876	-1.85831	0.0036096	0.0286514	0.725	1.729	0.287	2.445	1.569	1.664
TRINITY_DN195665_c0_g1							4.92886	-5.35131	0.00361698	0.0286752	0	5.113	0	3.815	7.738	8.836
TRINITY_DN211908_c1_g2	Picea sitchensis	XP_015889048.1protein TIFY 10A isoform X1	P:GO:0009611; P:GO:0031347; P:GO:2000022; C:GO:0005634	P:response to wounding; P:regulation of defense response; P:regulation of jasmonic acid mediated signaling pathway; C:nucleus			38.0463	-1.91662	0.00362707	0.0287416	0.384	1.281	1.696	5.01	3.385	4.084
TRINITY_DN214713_c4_g1							42.1343	-1.40854	0.00370834	0.0292363	1.301	1.815	0.968	3.552	3.81	5.01
TRINITY_DN213542_c1_g2	Amborella trichopoda	KZV34010.1Embryo sac development arrest 6					29.6594	-1.47024	0.00379298	0.0297343	1.408	2.445	1.236	4.056	2.949	4.367
TRINITY_DN208989_c4_g2							107.641	-1.0665	0.00379487	0.0297353	22.126	18.553	11.074	33.471	35.551	37.43
TRINITY_DN140142_c0_g1	Ginkgo biloba	XP_008794182.1transcription factor MYB41-like isoform X2	F:GO:0003677; C:GO:0005634	F:DNA binding; C:nucleus			8.71621	-3.66921	0.00382686	0.0299581	0.107	2.284	0.153	1.677	1.191	2.025
TRINITY_DN206990_c0_g1	Picea sitchensis	AAG02215.1class III peroxidase PSYP1	P:GO:0006979; P:GO:0042744; P:GO:0055114; P:GO:0098869; F:GO:0004601; F:GO:0020037; F:GO:0046872; C:GO:0005576; C:GO:0009505; C:GO:0009506; C:GO:0016020	P:response to oxidative stress; P:hydrogen peroxide catabolic process; P:oxidation-reduction process; P:cellular oxidant detoxification; F:peroxidase activity; F:heme binding; F:metal ion binding; C:extracellular region; C:plant-type cell wall; C:plasmodesma; C:membrane	EC:1.11.1.7	Peroxidase	233.02	-1.01499	0.00387486	0.0302756	8.147	7.547	15.481	28.132	17.079	26.089
TRINITY_DN210143_c1_g4	Physcomitrella patens	XP_024376784.1probable serine/threonine-protein kinase PBL7	P:GO:0016310; F:GO:0016301	P:phosphorylation; F:kinase activity			98.2915	-1.10525	0.00393964	0.0306428	5.044	6.512	3.861	12.148	6.428	11.058
TRINITY_DN178474_c0_g1	Helianthus annuus	XP_022015369.1transcription factor bHLH30-like	F:GO:0046983	F:protein dimerization activity			52.9696	-1.59694	0.00397171	0.0308481	1.674	1.484	1.044	4.484	2.206	5.937
TRINITY_DN148371_c0_g1							7.89989	-4.58299	0.00399379	0.0309714	0.608	13.76	0	7.225	10.403	9.411
TRINITY_DN173269_c0_g1	Picea sitchensis	XP_006837983.2GDSL esterase/lipase At4g16230 isoform X2	F:GO:0016788	F:hydrolase activity, acting on ester bonds			9.75941	-3.17951	0.00403924	0.0312716	0.085	0.246	0.249	1.71	1.038	1.544
TRINITY_DN209909_c0_g4	Cynara cardunculus var. scolymus	KVH98085.1Concanavalin A-like lectin/glucanase, subgroup	P:GO:0006468; F:GO:0004672; F:GO:0005524	P:protein phosphorylation; F:protein kinase activity; F:ATP binding			14.783	-3.56878	0.00405756	0.031399	0.522	4.451	0	3.53	1.085	5.739
TRINITY_DN207041_c7_g1	Picea sitchensis	ADE76509.1unknown	F:GO:0008270	F:zinc ion binding			16.8519	-2.11606	0.00406974	0.0314788	1.429	0.993	0.489	3.728	4.624	4.804
TRINITY_DN103916_c0_g1							5.19306	-5.42365	0.00410205	0.0316995	0	0.662	0	1.666	0.46	1.141
TRINITY_DN214254_c0_g1	Theobroma cacao	EOY34641.1Senescence associated gene 20, putative	C:GO:0016020	C:membrane			20.33	-1.93046	0.004237	0.0325481	1.408	5.957	1.676	6.271	3.586	7.121
TRINITY_DN204124_c0_g1	Cucumis sativus	XP_011649855.1 protein GLUTAMINE DUMPER 2	P:GO:0080143; C:GO:0016020; C:GO:0016021	P:regulation of amino acid export; C:membrane; C:integral component of membrane			17.5841	-2.08432	0.00426913	0.0327651	0.544	2.05	0.709	1.842	3.173	3.758
TRINITY_DN206144_c0_g2	Picea sitchensis	ADE75596.1unknown					44.7839	-1.43718	0.00427147	0.032768	1.397	1.847	2.184	5.548	3.02	6.511
TRINITY_DN211628_c2_g2	Pinus tabuliformis	AGC13137.1tau class glutathione S-transferase	P:GO:0006749; F:GO:0004364; C:GO:0005737	P:glutathione metabolic process; F:glutathione transferase activity; C:cytoplasm	EC:2.5.1.18	Glutathione transferase	157.073	-1.23948	0.00430594	0.0329424	5.449	11.657	12.099	15.009	27.483	20.366
TRINITY_DN191627_c0_g3	Picea sitchensis	XP_004307018.1 DNA-directed RNA polymerases I and III subunit RPAC2-like	P:GO:0006351; F:GO:0003677; F:GO:0003899; F:GO:0046983; C:GO:0005666; C:GO:0005736	P:transcription, DNA-templated; F:DNA binding; F:DNA-directed 5'-3' RNA polymerase activity; F:protein dimerization activity; C:RNA polymerase III complex; C:RNA polymerase I complex	EC:2.7.7.6	DNA-directed RNA polymerase	54.26	-1.02647	0.00433452	0.0330708	2.794	3.576	3.746	6.743	7.006	6.571
TRINITY_DN207645_c1_g2							32.6912	-1.35221	0.00440425	0.0334361	3.999	5.231	3.171	10.426	7.82	10.569
TRINITY_DN194142_c0_g1	Citrus clementina	XP_016496399.1 peroxidase 29-like	P:GO:0008152; P:GO:0009987; P:GO:0050896; F:GO:0004601; F:GO:0005488; C:GO:0009505; C:GO:0009506	P:metabolic process; P:cellular process; P:response to stimulus; F:peroxidase activity; F:binding; C:plant-type cell wall; C:plasmodesma	EC:1.11.1.7	Peroxidase	8.0638	-4.61555	0.0044429	0.0336688	0.096	0.192	0	2.346	0.896	1.965
TRINITY_DN117674_c0_g1	Picea sitchensis	XP_016722699.1 ADP,ATP carrier protein 3, mitochondrial-like	P:GO:0015867; P:GO:0055085; F:GO:0005347; C:GO:0005743; C:GO:0016021	P:ATP transport; P:transmembrane transport; F:ATP transmembrane transporter activity; C:mitochondrial inner membrane; C:integral component of membrane			27.5242	-1.97754	0.00449229	0.0339666	3.37	4.377	2.462	11.172	16.891	6.057
TRINITY_DN193149_c0_g2							10.7694	-2.85384	0.0045272	0.034174	0.224	0.822	1.035	4.331	5.096	3.878
TRINITY_DN183147_c0_g1	Picea sitchensis	XP_006848192.1mitochondrial inner membrane protease subunit 2	P:GO:0006465; P:GO:0006627; P:GO:0033108; F:GO:0008236; C:GO:0016021; C:GO:0042720	P:signal peptide processing; P:protein processing involved in protein targeting to mitochondrion; P:mitochondrial respiratory chain complex assembly; F:serine-type peptidase activity; C:integral component of membrane; C:mitochondrial inner membrane peptidase complex			35.3895	-1.92574	0.00452784	0.034174	2.453	3.149	0.556	6.644	4.647	6.374
TRINITY_DN228694_c0_g1	Parasponia andersonii	PON49025.1Major facilitator	P:GO:0055085; F:GO:0022857; C:GO:0016021	P:transmembrane transport; F:transmembrane transporter activity; C:integral component of membrane			33.9797	-1.24462	0.00455016	0.0343117	11.474	14.219	12.252	26.126	26.692	26.192
TRINITY_DN213995_c0_g3							10.7818	-2.85503	0.00457074	0.034436	0.256	3.544	1.207	5.416	4.246	4.401
TRINITY_DN212734_c0_g1							35.7427	-2.25021	0.00457488	0.0344364	0.416	7.931	4.282	7.97	17.233	8.416
TRINITY_DN213488_c1_g6							41.3235	-1.52275	0.00458167	0.0344567	4.319	14.785	10.404	23.078	15.534	22.262
TRINITY_DN207548_c1_g3	Picea sitchensis	AFO67248.1putative glucosyltransferase	F:GO:0008194	F:UDP-glycosyltransferase activity			11.4086	-3.3265	0.00461333	0.0346329	0	0.769	0.709	2.478	2.571	4.161
TRINITY_DN192599_c0_g1							4.65224	-5.2642	0.00465159	0.0347995	0	0.256	0	0.899	0.873	0.429
TRINITY_DN203009_c2_g1							14.412	-2.62116	0.00487287	0.0361397	0.107	0.961	2.021	4.21	6.829	3.44
TRINITY_DN212362_c1_g4							17.262	-2.35411	0.00488289	0.0361725	1.034	0.619	0.201	2.73	3.822	4.573
TRINITY_DN123887_c0_g1							11.8244	-2.46463	0.00501345	0.0369445	0.192	0.288	0.134	1.129	0.991	0.729
TRINITY_DN207434_c2_g3	Picea sitchensis	ABR17614.1unknown					34.2183	-3.59682	0.00511355	0.0374689	0	0.47	1.073	4.528	13.01	1.69
TRINITY_DN198039_c0_g1	Picea sitchensis	XP_010257590.1 F-box/kelch-repeat protein At1g15670-like					38.6298	-1.169	0.0051239	0.0375209	2.229	3.512	2.644	4.901	5.355	6.082
TRINITY_DN211122_c0_g7	Picea sitchensis	ABK27066.1unknown	P:GO:0030001; F:GO:0046872	P:metal ion transport; F:metal ion binding			14.7621	-2.39614	0.00514169	0.0376003	1.482	2.22	0.786	3.432	6.806	7.824
TRINITY_DN194029_c1_g1							9.35643	-3.77108	0.00516843	0.037756	0.053	0.747	0.077	0.713	1.309	0.395
TRINITY_DN215452_c5_g1	Physcomitrella patens	XP_024356379.1DNA topoisomerase 2-like	P:GO:0000712; P:GO:0000819; P:GO:0006265; P:GO:0044774; F:GO:0003677; F:GO:0003918; F:GO:0005524; C:GO:0005634	P:resolution of meiotic recombination intermediates; P:sister chromatid segregation; P:DNA topological change; P:mitotic DNA integrity checkpoint; F:DNA binding; F:DNA topoisomerase type II (double strand cut, ATP-hydrolyzing) activity; F:ATP binding; C:nucleus	EC:3.6.1.3; EC:5.6.2.2; EC:3.6.1.15	Adenosinetriphosphatase; DNA topoisomerase (ATP-hydrolyzing); Nucleoside-triphosphate phosphatase	57.2605	-1.09443	0.00520143	0.0379477	33.152	45.518	23.346	53.25	54.505	60.233
TRINITY_DN194725_c0_g2	Amborella trichopoda	PSS31599.1Ferredoxin/ferredoxin--NADP reductase	F:GO:0016787	F:hydrolase activity			50.8588	-1.01163	0.00523106	0.0380813	2.57	3.16	2.414	5.602	5.025	4.864
TRINITY_DN209971_c0_g1	Picea sitchensis	ABR18393.1unknown	P:GO:0005975; F:GO:0004553	P:carbohydrate metabolic process; F:hydrolase activity, hydrolyzing O-glycosyl compounds			39.2998	-1.17526	0.00524832	0.0381739	3.338	8.54	4.541	10.152	11.017	8.673
TRINITY_DN208819_c1_g1							10.3207	-2.9847	0.00529421	0.0384412	1.205	1.206	0	5.789	5.379	5.242
TRINITY_DN205739_c0_g3							95.8954	-1.07372	0.00532124	0.0386042	21.891	49.147	14.666	35.204	34.796	50.204
TRINITY_DN221817_c0_g1	Picea sitchensis	XP_006478217.1putative 12-oxophytodienoate reductase 11 isoform X1	P:GO:0055114; F:GO:0010181; F:GO:0016491	P:oxidation-reduction process; F:FMN binding; F:oxidoreductase activity			21.7433	-1.82515	0.0053592	0.0388481	4.916	6.352	1.763	12.4	11.5	12.971
TRINITY_DN209307_c2_g6	Picea sitchensis	GAV77190.1Polyketide_cyc2 domain-containing protein	P:GO:0009738; P:GO:0032515; P:GO:0080163; F:GO:0004864; F:GO:0010427; F:GO:0038023; C:GO:0005634; C:GO:0005737; C:GO:0016021	P:abscisic acid-activated signaling pathway; P:negative regulation of phosphoprotein phosphatase activity; P:regulation of protein serine/threonine phosphatase activity; F:protein phosphatase inhibitor activity; F:abscisic acid binding; F:signaling receptor activity; C:nucleus; C:cytoplasm; C:integral component of membrane			8.26798	-4.58758	0.0053865	0.0389936	0	0.512	0.192	1.228	1.463	3.131
TRINITY_DN190069_c0_g1							22.1552	-2.14988	0.00546925	0.0394738	1.088	2.893	1.954	6.589	3.326	10.166
TRINITY_DN214528_c1_g2	Chenopodium quinoa	XP_021730175.1peroxidase 66-like	P:GO:0008152; P:GO:0009987; P:GO:0050896; F:GO:0004601; F:GO:0005488; C:GO:0009505; C:GO:0009506	P:metabolic process; P:cellular process; P:response to stimulus; F:peroxidase activity; F:binding; C:plant-type cell wall; C:plasmodesma	EC:1.11.1.7	Peroxidase	51.6315	-1.51251	0.00547811	0.0394793	7.102	6.191	2.309	17.224	10.981	16.48
TRINITY_DN198713_c3_g2							33.2253	-1.59633	0.00549474	0.0395729	0.565	1.644	0.862	2.763	2.465	1.424
TRINITY_DN212176_c0_g2							18.3578	-2.45983	0.00559901	0.0401521	2.719	5.711	0.45	12.586	5.284	9.892
TRINITY_DN201511_c0_g4	Picea sitchensis	XP_010030596.1 flavonoid 3'-monooxygenase	P:GO:0055114; F:GO:0005506; F:GO:0016709; F:GO:0020037; C:GO:0016021	P:oxidation-reduction process; F:iron ion binding; F:oxidoreductase activity, acting on paired donors, with incorporation or reduction of molecular oxygen, NAD(P)H as one donor, and incorporation of one atom of oxygen; F:heme binding; C:integral component of membrane	EC:1.14.13	Acting on paired donors, with incorporation or reduction of molecular oxygen. The oxygen incorporated need not be derived from O(2)	53.918	-1.42799	0.00570419	0.0407847	2.293	4.153	3.832	8.639	4.954	11.359
TRINITY_DN214943_c2_g8							44.1435	-1.22557	0.00577748	0.0411688	15.291	31.224	16.209	32.145	42.415	26.861
TRINITY_DN198282_c0_g1							11.287	-3.139	0.00579782	0.0412481	0.608	1.174	0	1.995	2.076	4.015
TRINITY_DN208835_c1_g4	Picea sitchensis	AJP06317.1Lipase 2	P:GO:0006629; C:GO:0016021	P:lipid metabolic process; C:integral component of membrane			19.9966	-3.0442	0.00580348	0.0412668	0	8.946	3.257	12.465	5.921	13.898
TRINITY_DN206348_c0_g2	Physcomitrella patens	XP_024362397.1protein BPS1, chloroplastic-like	C:GO:0016020; C:GO:0016021	C:membrane; C:integral component of membrane			62.3457	-1.04063	0.00584173	0.0414862	2.346	3.864	1.533	4.287	3.81	5.636
TRINITY_DN154169_c0_g1	Daucus carota subsp. sativus	EOX98197.1 CUB and sushi domain-containing protein 3	P:GO:0022900; F:GO:0009055	P:electron transport chain; F:electron transfer activity			5.44625	-5.49536	0.00588974	0.0417919	0	0.587	0	0.318	2.135	2.093
TRINITY_DN193508_c0_g1	Picea sitchensis	XP_018850496.1 protein NDR1-like	C:GO:0016021	C:integral component of membrane			35.7486	-1.7296	0.00591248	0.0419179	2.218	2.306	1.255	3.728	4.812	9.394
TRINITY_DN215235_c7_g3							40.6773	-1.23908	0.00601081	0.0424362	6.409	11.486	12.406	20.721	17.044	18.402
TRINITY_DN214786_c1_g5							12.8844	-2.72465	0.00605316	0.0427173	0.491	0.598	0	2.028	1.875	1.93
TRINITY_DN214342_c2_g6	Picea sitchensis	XP_011097507.1protein DETOXIFICATION 27	P:GO:0042908; P:GO:0055085; F:GO:0015297; F:GO:0042910; C:GO:0016021	P:xenobiotic transport; P:transmembrane transport; F:antiporter activity; F:xenobiotic transmembrane transporter activity; C:integral component of membrane			11.709	-3.19767	0.00618702	0.0435342	0.597	0.843	0	4.429	5.143	1.742
TRINITY_DN203996_c0_g4	Coffea canephora	CDP20134.1unnamed protein product					16.5374	-2.27411	0.00621774	0.0436955	0.331	1.42	0.613	2.423	1.215	3.26
TRINITY_DN214715_c4_g1							51.2162	-1.00862	0.00629801	0.0441859	1.866	2.103	3.334	4.879	4.518	4.581
TRINITY_DN213215_c1_g5	Picea abies	XP_024019535.1cationic peroxidase 1	P:GO:0006979; P:GO:0042744; P:GO:0055114; P:GO:0098869; F:GO:0004601; F:GO:0020037; F:GO:0046872; C:GO:0005576	P:response to oxidative stress; P:hydrogen peroxide catabolic process; P:oxidation-reduction process; P:cellular oxidant detoxification; F:peroxidase activity; F:heme binding; F:metal ion binding; C:extracellular region	EC:1.11.1.7	Peroxidase	12.3917	-2.6007	0.00635479	0.0443991	1.354	4.9	0.441	6.688	3.421	7.172
TRINITY_DN215425_c2_g1	Picea sitchensis	ACN39861.1unknown	F:GO:0043531	F:ADP binding			55.4052	-1.33836	0.00640047	0.0446072	7.411	8.39	7.76	24.481	22.21	11.556
TRINITY_DN214186_c2_g1							179.019	-1.63131	0.00640767	0.0446389	107.826	209.836	31.115	234.519	132.33	262.911
TRINITY_DN213215_c1_g1	Picea abies	XP_004149367.1 peroxidase P7	P:GO:0006979; P:GO:0042744; P:GO:0055114; P:GO:0098869; F:GO:0004601; F:GO:0020037; F:GO:0046872; C:GO:0005576; C:GO:0016020	P:response to oxidative stress; P:hydrogen peroxide catabolic process; P:oxidation-reduction process; P:cellular oxidant detoxification; F:peroxidase activity; F:heme binding; F:metal ion binding; C:extracellular region; C:membrane	EC:1.11.1.7	Peroxidase	13.2715	-2.59908	0.00646261	0.0449101	1.077	6.234	1.868	9.483	3.904	11.582
TRINITY_DN141052_c0_g1							8.52734	-3.72945	0.00652286	0.0452727	0.107	0.459	0	1.151	0.472	0.729
TRINITY_DN204305_c3_g2	Acinetobacter baumannii	XP_010256373.2 gibberellin-regulated protein 2-like	C:GO:0016021	C:integral component of membrane			13.9639	-2.62355	0.00669764	0.0463064	0.139	5.935	0.536	1.217	1.675	3.397
TRINITY_DN208619_c1_g2	Picea sitchensis	XP_006836042.1protein trichome birefringence-like 36	F:GO:0016413; C:GO:0005794	F:O-acetyltransferase activity; C:Golgi apparatus			47.5054	-1.45083	0.00673804	0.0465168	4.063	2.295	2.701	9.593	5.614	14.009
TRINITY_DN201574_c1_g1	Picea sitchensis	ABK26511.1unknown	P:GO:0010112	P:regulation of systemic acquired resistance			173.337	-1.28914	0.00680115	0.0467798	16.197	18.094	6.121	30.994	17.94	35.877
TRINITY_DN200729_c0_g2							211.843	-2.23742	0.00686239	0.047124	6.771	4.761	1.207	18.934	15.499	23.644
TRINITY_DN188652_c0_g1							12.0686	-2.3978	0.00690504	0.0473589	0.192	1.388	0.575	1.809	2.418	2.539
TRINITY_DN203329_c1_g7	Capsella rubella	OTF94560.1putative ubiquitin	P:GO:0006412; P:GO:0016567; P:GO:0019941; P:GO:0055085; F:GO:0003735; F:GO:0005524; F:GO:0016887; F:GO:0031386; F:GO:0031625; F:GO:0042626; C:GO:0005634; C:GO:0005737; C:GO:0005840; C:GO:0016021	P:translation; P:protein ubiquitination; P:modification-dependent protein catabolic process; P:transmembrane transport; F:structural constituent of ribosome; F:ATP binding; F:ATPase activity; F:protein tag; F:ubiquitin protein ligase binding; F:ATPase-coupled transmembrane transporter activity; C:nucleus; C:cytoplasm; C:ribosome; C:integral component of membrane	EC:3.6.1.3; EC:3.6.1.15	Adenosinetriphosphatase; Nucleoside-triphosphate phosphatase	96.224	-1.10344	0.00694257	0.0475775	54.307	93.725	45.321	85.438	75.111	136.5
TRINITY_DN202072_c1_g2	Picea sitchensis	OVA08911.1Brevis radix (BRX) domain	P:GO:0008150; C:GO:0005634	P:biological_process; C:nucleus			26.0191	-1.58999	0.00711357	0.0485714	1.205	2.53	1.648	4.32	2.701	3.878
TRINITY_DN213273_c0_g5	Picea sitchensis	XP_019425796.1 cullin-1-like	P:GO:0006511; P:GO:0016567; F:GO:0004842; F:GO:0031625; C:GO:0016020; C:GO:0016021; C:GO:0031461	P:ubiquitin-dependent protein catabolic process; P:protein ubiquitination; F:ubiquitin-protein transferase activity; F:ubiquitin protein ligase binding; C:membrane; C:integral component of membrane; C:cullin-RING ubiquitin ligase complex			22.322	-1.91589	0.00712971	0.0486356	3.743	18.959	2.931	10.799	7.018	19.449
TRINITY_DN207375_c0_g1	Picea glauca	ASU43996.1UDP-glycosyltransferase UGT5	F:GO:0008194	F:UDP-glycosyltransferase activity			13.1904	-2.16136	0.007148	0.0487077	0.938	0.566	0.872	5.241	3.338	3.655
TRINITY_DN178560_c0_g1	Picea sitchensis	XP_011657395.1 ABC transporter G family member 29-like	F:GO:0005524; F:GO:0016887	F:ATP binding; F:ATPase activity	EC:3.6.1.3; EC:3.6.1.15	Adenosinetriphosphatase; Nucleoside-triphosphate phosphatase	35.8616	-1.18236	0.00725347	0.0492932	6.003	6.533	6.265	11.731	13.411	16.043
TRINITY_DN200281_c0_g1							7.67011	-4.54602	0.00726435	0.0493348	0.043	0.512	0	0.548	0.72	0.729
TRINITY_DN207507_c1_g4	Erythranthe guttata	XP_012854836.1 protein QUIRKY	C:GO:0005829; C:GO:0009506; C:GO:0016020; C:GO:0016021	C:cytosol; C:plasmodesma; C:membrane; C:integral component of membrane			35.3108	-1.92744	0.00726641	0.0493348	3.753	4.227	0.604	8.146	11.654	8.596
TRINITY_DN215504_c5_g5	Picea sitchensis	XP_020889645.112-oxophytodienoate reductase 2	P:GO:0055114; F:GO:0010181; F:GO:0016491	P:oxidation-reduction process; F:FMN binding; F:oxidoreductase activity			9.45945	-2.77852	0.00736264	0.0498235	2.378	3.907	1.533	13.891	9.129	15.313

## Sheet: FS2 vs FS4
Supplementary Table 2b: Transcriptome analysis of Pinus halepensis female cone development. Differentialy expressed genes in developmental stage 2 versus stage 4.
Contig ID	Blast Top Hit Taxonomy	Name	GO Ids	GO Terms	EC #	EC desc	baseMean	log2FoldChange	pvalue	padj	female_s2_rep1	female_s2_rep2	female_s2_rep3	female_s4_rep1	female_s4_rep2	female_s4_rep3
TRINITY_DN214945_c2_g1	Abies alba	ABD24253.1chalcone synthase	P:GO:0009058; F:GO:0016210	P:biosynthetic process; F:naringenin-chalcone synthase activity	EC:2.3.1.74	Chalcone synthase	1206.51	-1.34571	0.000306045	0.00371983	421.291	331.54	393.859	720.198	1223.19	1064.98
TRINITY_DN203237_c1_g2	Abies alba	ABD24236.1chalcone synthase	P:GO:0009058; F:GO:0016747	P:biosynthetic process; F:transferase activity, transferring acyl groups other than amino-acyl groups			435.46	-1.88996	0.00152064	0.0136739	209.446	248.713	131.309	262.398	786.849	662.029
TRINITY_DN214822_c2_g1	Abies grandis	O81086.1RecName: Full=Alpha-bisabolene synthase; AltName: Full=(E)-alpha-bisabolene synthase; AltName: Full=AgfEabis	F:GO:0000287; F:GO:0010333; F:GO:0016853; F:GO:0052681; C:GO:0009536	F:magnesium ion binding; F:terpene synthase activity; F:isomerase activity; F:alpha-bisabolene synthase activity; C:plastid	EC:4.2.3.38	Alpha-bisabolene synthase	61.9082	-5.28295	1.51727e-08	6.40144e-07	0	0.171	1.341	15.157	31.155	15.711
TRINITY_DN211483_c1_g4	Abrus precatorius	XP_027346594.1homeobox-leucine zipper protein HAT22 isoform X1	P:GO:0006355; F:GO:0043565	P:regulation of transcription, DNA-templated; F:sequence-specific DNA binding			37.612	-8.46997	7.70702e-08	2.74292e-06	0	0.107	0	8.335	3.878	11.104
TRINITY_DN214303_c3_g2	Abrus precatorius	XP_027359246.1mitochondrial phosphate carrier protein 3, mitochondrial-like	P:GO:0009651; P:GO:0035435; F:GO:0005315; C:GO:0031305	P:response to salt stress; P:phosphate ion transmembrane transport; F:inorganic phosphate transmembrane transporter activity; C:integral component of mitochondrial inner membrane			52.4508	-2.88935	2.10954e-06	5.15414e-05	0.896	0.192	0.968	10.862	5.895	5.33
TRINITY_DN215136_c10_g1	Acidomyces richmondensis BFW	KYG39742.1hypothetical protein M433DRAFT_47794, partial					4.43046	4.87941	0.0072226	0.0476431	9.821	1.986	9.992	0	0	0.796
TRINITY_DN209792_c0_g1	Acinetobacter baumannii	XP_026392207.1metallothionein-like protein type 3					421.853	2.2579	5.10559e-06	0.000111331	245.413	297.391	212.755	43.036	20.692	71.766
TRINITY_DN209903_c0_g5	Acinetobacter baumannii	AAR36911.1disease resistance gene	C:GO:0016021	C:integral component of membrane			2119.78	1.17393	0.000252535	0.00317489	308.016	348.256	248.487	164.468	97.356	103.45
TRINITY_DN214663_c0_g3	Acinetobacter baumannii	OIC65326.1thiazole biosynthesis enzyme	P:GO:0009228; P:GO:0052837; F:GO:0005506; F:GO:0016763; C:GO:0005829; C:GO:0009570	P:thiamine biosynthetic process; P:thiazole biosynthetic process; F:iron ion binding; F:transferase activity, transferring pentosyl groups; C:cytosol; C:chloroplast stroma			426.848	1.08831	0.00279543	0.0222919	560.914	498.195	361.652	230.403	211.72	178.781
TRINITY_DN210128_c0_g3	Acinetobacter baumannii	AFD01291.1non-specific lipid-transfer protein	P:GO:0006869; F:GO:0008289	P:lipid transport; F:lipid binding			43.1796	1.27678	0.00706972	0.0468049	61.036	68.928	59.547	25.897	25.169	18.579
TRINITY_DN212953_c0_g1	Acinetobacter baumannii	XP_020083130.1MLP-like protein 423	P:GO:0006952; P:GO:0009738; P:GO:0032515; F:GO:0004864; F:GO:0010427; F:GO:0038023	P:defense response; P:abscisic acid-activated signaling pathway; P:negative regulation of phosphoprotein phosphatase activity; F:protein phosphatase inhibitor activity; F:abscisic acid binding; F:signaling receptor activity			7809.76	-3.57393	1.19601e-38	2.01337e-35	300.029	674.501	221.635	3142.8	2165.54	3425.92
TRINITY_DN213535_c1_g4	Acinetobacter baumannii	XP_006846771.1probable aquaporin PIP2-2	P:GO:0006833; P:GO:0055085; F:GO:0015250; C:GO:0005773; C:GO:0005886; C:GO:0009506; C:GO:0016021	P:water transport; P:transmembrane transport; F:water channel activity; C:vacuole; C:plasma membrane; C:plasmodesma; C:integral component of membrane			7929.54	-2.11165	3.87232e-32	3.10412e-29	156.994	227.353	150.784	654.065	627.795	631.431
TRINITY_DN214878_c2_g2	Acinetobacter baumannii	A0AT29.1RecName: Full=Non-specific lipid-transfer protein 2; Short=LTP2; Contains: RecName: Full=Non-specific lipid-transfer protein 7; Short=LTP7; Flags: Precursor	P:GO:0006869; F:GO:0008289; C:GO:0016020	P:lipid transport; F:lipid binding; C:membrane			16921.7	-2.30131	1.0286e-11	7.79972e-10	1481.13	1596.02	967.586	6035.96	4179.63	7485.53
TRINITY_DN214796_c4_g5	Acinetobacter baumannii	WP_071414642.1hypothetical protein					1683.44	-3.36053	7.47792e-11	5.09649e-09	75.047	127.522	56.463	279.491	589.717	982.632
TRINITY_DN214878_c2_g6	Acinetobacter baumannii	RHN59412.1putative plant lipid transfer protein/Par allergen	P:GO:0006869; F:GO:0008289; C:GO:0016020	P:lipid transport; F:lipid binding; C:membrane			1787.78	-1.86802	4.13138e-10	2.38798e-08	612.812	755.406	506.391	2021.2	1492.05	2432.31
TRINITY_DN214796_c4_g6	Acinetobacter baumannii	WP_071414642.1hypothetical protein					334.167	-3.12602	1.57211e-07	5.1994e-06	34.634	40.906	18.039	93.89	282.424	280.24
TRINITY_DN209550_c1_g2	Acinetobacter baumannii	WP_082181580.1MIP family channel protein	P:GO:0006833; P:GO:0055085; F:GO:0015250; C:GO:0016021	P:water transport; P:transmembrane transport; F:water channel activity; C:integral component of membrane			4675.93	-1.06999	1.47429e-05	0.000278543	538.457	558.209	410.633	894.579	1023.57	982.07
TRINITY_DN214878_c8_g1	Acinetobacter baumannii	WP_071414555.1hypothetical protein	P:GO:0006869; F:GO:0008289	P:lipid transport; F:lipid binding			1312.05	-1.0759	0.00250132	0.0204702	674.317	730.491	459.48	1038.69	976.589	1391.62
TRINITY_DN209443_c1_g2	Acinetobacter baumannii	CAA78932.1Lhca4 protein,Type 4 protein of light-harvesting complex of photosystem I	P:GO:0009416; P:GO:0009768; P:GO:0018298; F:GO:0016168; C:GO:0009522; C:GO:0009523; C:GO:0009535; C:GO:0016021	P:response to light stimulus; P:photosynthesis, light harvesting in photosystem I; P:protein-chromophore linkage; F:chlorophyll binding; C:photosystem I; C:photosystem II; C:chloroplast thylakoid membrane; C:integral component of membrane			4426.28	-1.02034	0.00341045	0.0260369	217.582	177.32	112.245	321.427	364.514	291.027
TRINITY_DN210200_c4_g5	Acinetobacter baumannii	XP_009367837.1 probable aquaporin PIP1-2	P:GO:0006833; P:GO:0009414; P:GO:0055085; F:GO:0005515; F:GO:0015250; C:GO:0005773; C:GO:0005886; C:GO:0009506; C:GO:0016021	P:water transport; P:response to water deprivation; P:transmembrane transport; F:protein binding; F:water channel activity; C:vacuole; C:plasma membrane; C:plasmodesma; C:integral component of membrane			148.74	-1.19889	0.00417909	0.0305873	19.044	20.837	11.199	27.598	41.618	31.892
TRINITY_DN208180_c0_g1	Acinetobacter baumannii	CAA43907.1chlorophyll a/b-binding protein	P:GO:0009765; P:GO:0018298; F:GO:0016168; F:GO:0046872; C:GO:0009522; C:GO:0009523; C:GO:0009535; C:GO:0016021	P:photosynthesis, light harvesting; P:protein-chromophore linkage; F:chlorophyll binding; F:metal ion binding; C:photosystem I; C:photosystem II; C:chloroplast thylakoid membrane; C:integral component of membrane			212.874	-1.88739	0.00435384	0.0315237	37.118	47.258	9.561	44.323	117.306	89.087
TRINITY_DN212521_c2_g2	Acinetobacter baumannii	AFP90212.1early light-induced protein	C:GO:0016021	C:integral component of membrane			17.0645	-3.12657	0.00473688	0.033717	0.149	0.427	0.469	5.356	0.885	2.679
TRINITY_DN210433_c0_g1	Actinidia chinensis var. chinensis	PNX91497.1retrovirus-related Pol polyprotein from transposon TNT 1-94	P:GO:0090304; F:GO:0003824	P:nucleic acid metabolic process; F:catalytic activity			25.2216	3.74727	0.000640769	0.00685306	3.071	3	1.811	0.094	0	0.443
TRINITY_DN210600_c0_g3	Actinidia chinensis var. chinensis	PSS30615.1Heavy metal-associated isoprenylated plant protein	P:GO:0030001; F:GO:0046872	P:metal ion transport; F:metal ion binding			136.025	-3.76798	4.50868e-08	1.69797e-06	4.543	18.542	2.644	29.928	24.414	93.694
TRINITY_DN206930_c1_g10	Amborella trichopoda	XP_006854627.1BEL1-like homeodomain protein 1	P:GO:0006355; P:GO:0006357; F:GO:0000978; F:GO:0003677; C:GO:0005634	P:regulation of transcription, DNA-templated; P:regulation of transcription by RNA polymerase II; F:RNA polymerase II proximal promoter sequence-specific DNA binding; F:DNA binding; C:nucleus			1687.27	2.92187	6.12594e-49	2.5781e-45	93.612	97.355	92.463	11.088	12.845	12.914
TRINITY_DN211830_c0_g1	Amborella trichopoda	XP_006838303.1polygalacturonase isoform X1	P:GO:0003006; P:GO:0007275; P:GO:0008152; P:GO:0009987; P:GO:0048609	P:developmental process involved in reproduction; P:multicellular organism development; P:metabolic process; P:cellular process; P:multicellular organismal reproductive process			323.064	3.83651	1.92313e-18	3.33752e-16	66.208	28.587	34.506	4.172	2.798	2.145
TRINITY_DN200485_c0_g1	Amborella trichopoda	XP_006855389.1zerumbone synthase	P:GO:0055114; F:GO:0016491	P:oxidation-reduction process; F:oxidoreductase activity			295.174	1.82233	1.0116e-10	6.64568e-09	38.131	20.101	29.544	11.36	8.407	9.593
TRINITY_DN205658_c1_g2	Amborella trichopoda	XP_006846332.1protein JINGUBANG	P:GO:0032259; F:GO:0008168; F:GO:0016874	P:methylation; F:methyltransferase activity; F:ligase activity			29.0047	4.89755	4.87931e-09	2.28798e-07	6.6	8.294	5.508	0.094	0.078	0.425
TRINITY_DN213062_c0_g1	Amborella trichopoda	XP_006836662.1uncharacterized protein LOC18427550					233.522	2.14182	6.0431e-09	2.78711e-07	39.912	34.031	25.31	7.433	8.212	5.412
TRINITY_DN211524_c0_g3	Amborella trichopoda	XP_006840585.3probable glycosyltransferase 2	P:GO:0009969; F:GO:0016758; C:GO:0005768; C:GO:0005802	P:xyloglucan biosynthetic process; F:transferase activity, transferring hexosyl groups; C:endosome; C:trans-Golgi network			252.179	1.61372	6.59218e-08	2.38651e-06	39.827	44.076	33.51	12.864	12.506	9.548
TRINITY_DN208470_c1_g1	Amborella trichopoda	XP_011624272.1protein ENHANCED DISEASE RESISTANCE 2	F:GO:0008289	F:lipid binding			321.92	1.60939	7.42028e-08	2.65772e-06	32.768	32.686	23.097	7.433	7.756	8.57
TRINITY_DN214282_c0_g1	Amborella trichopoda	XP_006846917.1CO(2)-response secreted protease	F:GO:0008233	F:peptidase activity			1119.18	1.30743	3.23891e-07	9.82411e-06	89.507	114.093	94.168	28.359	32.873	33.946
TRINITY_DN196201_c0_g1	Amborella trichopoda	XP_020525782.1probable proline transporter 2	C:GO:0005886	C:plasma membrane			25.7961	5.16076	4.80907e-06	0.000106241	4.489	4.74	4.809	0.395	0	0
TRINITY_DN215382_c0_g2	Amborella trichopoda	RVW47888.1TPR and ankyrin repeat-containing protein 1	F:GO:0005524; F:GO:0016874; C:GO:0016020; C:GO:0016021	F:ATP binding; F:ligase activity; C:membrane; C:integral component of membrane			12.6085	7.404	4.82753e-06	0.000106509	1.354	1.655	4.34	0	0	0
TRINITY_DN211597_c1_g7	Amborella trichopoda	RWR93653.1Inosine/uridine-preferring nucleoside hydrolase domain-containing protein	F:GO:0016787; C:GO:0016020; C:GO:0016021	F:hydrolase activity; C:membrane; C:integral component of membrane			44.8817	2.37441	6.76742e-06	0.000140993	8.307	12.97	6.744	1.832	0.807	1.665
TRINITY_DN203393_c0_g2	Amborella trichopoda	XP_006846812.1cytokinin riboside 5'-monophosphate phosphoribohydrolase LOG1	P:GO:0009691; F:GO:0016799; C:GO:0005634; C:GO:0005829	P:cytokinin biosynthetic process; F:hydrolase activity, hydrolyzing N-glycosyl compounds; C:nucleus; C:cytosol			45.9588	2.25167	9.57994e-06	0.000190625	9.16	7.665	7.769	1.607	1.028	2.181
TRINITY_DN207203_c0_g2	Amborella trichopoda	EEF37627.1 hydrolase, putative	P:GO:0006807; P:GO:0043170; P:GO:0044237; P:GO:0044238; F:GO:0016787	P:nitrogen compound metabolic process; P:macromolecule metabolic process; P:cellular metabolic process; P:primary metabolic process; F:hydrolase activity			47.038	1.90511	1.23741e-05	0.000239157	6.174	5.69	5.499	1.654	1.405	1.52
TRINITY_DN196211_c0_g1	Amborella trichopoda	XP_020523202.1uncharacterized protein LOC18434716 isoform X2					213.3	1.20733	1.47849e-05	0.000279024	23.64	23.645	17.512	8.805	6.962	8.552
TRINITY_DN205339_c1_g1	Amborella trichopoda	XP_020517143.1protein IQ-DOMAIN 31-like	C:GO:0016020	C:membrane			64.7906	2.22828	2.38943e-05	0.000422518	6.291	11.08	15.605	2.086	2.538	2.344
TRINITY_DN201924_c0_g1	Amborella trichopoda	XP_006854095.1uncharacterized protein LOC18443852 isoform X1					174.431	1.22693	3.46889e-05	0.00058047	11.154	7.27	12.53	4.463	3.93	5.819
TRINITY_DN212730_c1_g2	Amborella trichopoda	XP_006452332.1CAP-Gly domain-containing linker protein 1					86.1029	1.71257	8.02028e-05	0.00120471	11.463	6.597	8.315	1.776	2.434	3.602
TRINITY_DN208716_c1_g3	Amborella trichopoda	XP_006828794.1heat shock protein 83	P:GO:0006457; P:GO:0034605; P:GO:0050821; F:GO:0005524; F:GO:0016787; F:GO:0051082; C:GO:0005829; C:GO:0005886; C:GO:0009986; C:GO:0032991; C:GO:0048471	P:protein folding; P:cellular response to heat; P:protein stabilization; F:ATP binding; F:hydrolase activity; F:unfolded protein binding; C:cytosol; C:plasma membrane; C:cell surface; C:protein-containing complex; C:perinuclear region of cytoplasm			102.645	1.50939	0.000123588	0.00174391	50.373	25.598	44.584	18.925	12.324	22.589
TRINITY_DN211664_c6_g4	Amborella trichopoda	XP_011627583.1 MLO protein homolog 1-like	P:GO:0050896; C:GO:0016020	P:response to stimulus; C:membrane			186.066	1.7433	0.000322461	0.00387459	24.269	27.594	14.571	6.643	2.29	8.606
TRINITY_DN211615_c0_g1	Amborella trichopoda	XP_006856263.1oligopeptide transporter 3	P:GO:0006875; P:GO:0035672; P:GO:0055072; P:GO:1990388; F:GO:0035673; F:GO:0046915; C:GO:0005887; C:GO:0009506	P:cellular metal ion homeostasis; P:oligopeptide transmembrane transport; P:iron ion homeostasis; P:xylem-to-phloem iron transport; F:oligopeptide transmembrane transporter activity; F:transition metal ion transmembrane transporter activity; C:integral component of plasma membrane; C:plasmodesma			176.595	1.00383	0.000749283	0.00776212	13.713	11.689	19.083	7.715	5.687	8.597
TRINITY_DN208032_c1_g1	Amborella trichopoda	XP_006844659.1ethylene-responsive transcription factor LEP	P:GO:0006355; F:GO:0003677; F:GO:0003700; C:GO:0005634	P:regulation of transcription, DNA-templated; F:DNA binding; F:DNA-binding transcription factor activity; C:nucleus			15.6366	3.16036	0.000871286	0.00876179	0.832	0.822	2.452	0.207	0.234	0.1
TRINITY_DN211832_c3_g2	Amborella trichopoda	XP_020525883.1membrane protein of ER body-like protein isoform X6	C:GO:0110165	C:cellular anatomical entity			147.115	1.00238	0.00271764	0.0217566	15.099	22.214	15.069	6.587	7.964	6
TRINITY_DN205703_c0_g2	Amborella trichopoda	XP_006840339.1CBL-interacting protein kinase 1	P:GO:0006468; P:GO:0007584; P:GO:0009414; P:GO:0010118; P:GO:0035556; F:GO:0004674; F:GO:0005524; C:GO:0005634; C:GO:0005829; C:GO:0005886; C:GO:0009536; C:GO:0016021	P:protein phosphorylation; P:response to nutrient; P:response to water deprivation; P:stomatal movement; P:intracellular signal transduction; F:protein serine/threonine kinase activity; F:ATP binding; C:nucleus; C:cytosol; C:plasma membrane; C:plastid; C:integral component of membrane	EC:2.7.11	Transferring phosphorus-containing groups	7.43858	4.0624	0.00313504	0.0243725	3.519	12.82	6.658	0.658	0	0.398
TRINITY_DN202609_c0_g2	Amborella trichopoda	XP_006857640.1cytochrome P450 724B1	P:GO:0007275; P:GO:0010268; P:GO:0016125; P:GO:0016132; P:GO:0055114; F:GO:0004497; F:GO:0005506; F:GO:0016705; F:GO:0020037; C:GO:0016021	P:multicellular organism development; P:brassinosteroid homeostasis; P:sterol metabolic process; P:brassinosteroid biosynthetic process; P:oxidation-reduction process; F:monooxygenase activity; F:iron ion binding; F:oxidoreductase activity, acting on paired donors, with incorporation or reduction of molecular oxygen; F:heme binding; C:integral component of membrane			145.971	1.14034	0.00317197	0.0246069	9.064	10.6	14.887	6.145	4.75	5.168
TRINITY_DN210809_c0_g1	Amborella trichopoda	XP_006826864.2WUSCHEL-related homeobox 1 isoform X1	F:GO:0003677; C:GO:0005634	F:DNA binding; C:nucleus			234.109	-4.17239	7.54296e-33	6.68306e-30	1.312	2.605	1.351	23.83	22.839	21.738
TRINITY_DN204845_c1_g6	Amborella trichopoda	XP_020525563.1ultraviolet-B receptor UVR8 isoform X2	P:GO:0009631; P:GO:0071497; P:GO:1901141; F:GO:0042393; C:GO:0005634	P:cold acclimation; P:cellular response to freezing; P:regulation of lignin biosynthetic process; F:histone binding; C:nucleus			298.848	-2.62137	1.59719e-22	4.71704e-20	3.434	7.889	3.171	17.478	20.562	22.471
TRINITY_DN207370_c1_g2	Amborella trichopoda	XP_006829101.1serine/threonine receptor-like kinase NFP	F:GO:0016301	F:kinase activity			611.601	-1.86045	5.18265e-19	9.48311e-17	18.181	24.243	18.345	65.766	60.071	68.979
TRINITY_DN194812_c0_g1	Amborella trichopoda	XP_006833072.1BES1/BZR1 homolog protein 4	P:GO:0006351; P:GO:0006355; P:GO:0009742; F:GO:0003700	P:transcription, DNA-templated; P:regulation of transcription, DNA-templated; P:brassinosteroid mediated signaling pathway; F:DNA-binding transcription factor activity			387.893	-1.79758	1.18578e-11	8.91134e-10	17.242	14.037	15.49	49.003	60.579	57.304
TRINITY_DN203487_c0_g3	Amborella trichopoda	XP_011624098.1methyl-CpG-binding domain-containing protein 5 isoform X3	F:GO:0003677; C:GO:0042025	F:DNA binding; C:host cell nucleus			240.027	-2.4773	9.28425e-08	3.24255e-06	1.887	2.893	4.091	23.877	13.521	16.634
TRINITY_DN214871_c0_g3	Amborella trichopoda	XP_011621860.1L-gulonolactone oxidase 2 isoform X2	F:GO:0016491; F:GO:0050660	F:oxidoreductase activity; F:flavin adenine dinucleotide binding			148.151	-1.50202	3.62213e-07	1.07539e-05	6.014	7.088	6.706	19.178	20.184	17.919
TRINITY_DN210377_c0_g1	Amborella trichopoda	XP_020531583.11-acyl-sn-glycerol-3-phosphate acyltransferase isoform X1	P:GO:0006654; F:GO:0003841; C:GO:0005783; C:GO:0016021	P:phosphatidic acid biosynthetic process; F:1-acylglycerol-3-phosphate O-acyltransferase activity; C:endoplasmic reticulum; C:integral component of membrane	EC:2.3.1.51	1-acylglycerol-3-phosphate O-acyltransferase	107.724	-1.93311	6.97558e-07	1.95386e-05	2.517	3.896	2.213	10.552	6.884	7.892
TRINITY_DN212071_c2_g1	Amborella trichopoda	XP_011624098.1methyl-CpG-binding domain-containing protein 5 isoform X3	F:GO:0003677; C:GO:0042025	F:DNA binding; C:host cell nucleus			131.33	-1.65269	9.03168e-07	2.42101e-05	5.428	12.906	4.359	14.555	13.43	19.647
TRINITY_DN210320_c0_g1	Amborella trichopoda	XP_011623822.1beta-fructofuranosidase, soluble isoenzyme I	P:GO:0005975; F:GO:0004575; C:GO:0005773; C:GO:0016021	P:carbohydrate metabolic process; F:sucrose alpha-glucosidase activity; C:vacuole; C:integral component of membrane	EC:3.2.1.20; EC:3.2.1.26; EC:3.2.1.48	Alpha-glucosidase; Beta-fructofuranosidase; Sucrose alpha-glucosidase	890.35	-1.36382	2.03505e-06	5.00849e-05	46.875	51.581	60.084	124.514	113.297	167.614
TRINITY_DN203858_c1_g1	Amborella trichopoda	XP_011624969.1alpha-ketoglutarate-dependent dioxygenase alkB isoform X1	F:GO:0016491; C:GO:0005719; C:GO:0005739	F:oxidoreductase activity; C:nuclear euchromatin; C:mitochondrion			379.107	-1.28975	2.71392e-06	6.42561e-05	16.432	24.477	18.853	45.028	34.63	50.046
TRINITY_DN213732_c0_g9	Amborella trichopoda	XP_006845419.1heptahelical transmembrane protein ADIPOR2	P:GO:0009725; F:GO:0038023; C:GO:0016021	P:response to hormone; F:signaling receptor activity; C:integral component of membrane			240.495	-1.38009	3.19703e-06	7.3523e-05	15.472	18.67	11.256	35.077	28.982	38.58
TRINITY_DN211597_c1_g3	Amborella trichopoda	RWR93653.1Inosine/uridine-preferring nucleoside hydrolase domain-containing protein	F:GO:0016787; C:GO:0016021	F:hydrolase activity; C:integral component of membrane			237.346	-2.266	3.2291e-06	7.41575e-05	6.718	4.58	2.941	19.582	32.599	19.385
TRINITY_DN187304_c0_g1	Amborella trichopoda	XP_006855559.1beta-glucosidase 22 isoform X2	P:GO:0008152; F:GO:0008422	P:metabolic process; F:beta-glucosidase activity	EC:3.2.1.21	Beta-glucosidase	18.6193	-7.45468	1.56891e-05	0.000293131	0	0.149	0	1.597	4.464	1.068
TRINITY_DN212543_c0_g2	Amborella trichopoda	XP_006826915.1endoglucanase 8 isoform X1	P:GO:0030245; P:GO:0042547; F:GO:0008810; C:GO:0009507	P:cellulose catabolic process; P:cell wall modification involved in multidimensional cell growth; F:cellulase activity; C:chloroplast	EC:3.2.1.4	Cellulase	730.344	-1.40477	1.73997e-05	0.000322585	24.067	29.516	18.058	55.487	59.16	38.218
TRINITY_DN210412_c1_g2	Amborella trichopoda	PON42217.1AAA+ ATPase domain containing protein	C:GO:0009507	C:chloroplast			154.994	-1.38225	3.39111e-05	0.00056972	3.913	3.736	3.688	9.444	7.795	12.38
TRINITY_DN177341_c0_g1	Amborella trichopoda	XP_006852653.1O-acyltransferase WSD1	P:GO:0019432; F:GO:0004144; F:GO:0047196; C:GO:0005886	P:triglyceride biosynthetic process; F:diacylglycerol O-acyltransferase activity; F:long-chain-alcohol O-fatty-acyltransferase activity; C:plasma membrane	EC:2.3.1.20; EC:2.3.1.75	Diacylglycerol O-acyltransferase; Long-chain-alcohol O-fatty-acyltransferase	21.9069	-2.94033	0.000124737	0.0017557	0.277	0.352	0.517	2.434	3.553	2.634
TRINITY_DN208632_c0_g1	Amborella trichopoda	XP_006847004.2G-type lectin S-receptor-like serine/threonine-protein kinase At1g34300	P:GO:0009987; F:GO:0005488; F:GO:0016301; C:GO:0016020	P:cellular process; F:binding; F:kinase activity; C:membrane			18.0626	-3.07228	0.000154797	0.00209642	0.309	1.025	0.795	4.21	3.865	3.783
TRINITY_DN200629_c0_g1	Amborella trichopoda	XP_006846855.1acidic mammalian chitinase	P:GO:0006032; F:GO:0004568; F:GO:0008061; C:GO:0005576	P:chitin catabolic process; F:chitinase activity; F:chitin binding; C:extracellular region	EC:3.2.1.14	Chitinase	19.7324	-3.47745	0.000729287	0.00763483	1.077	0.961	0.872	4.623	13.899	2.507
TRINITY_DN214342_c2_g2	Amborella trichopoda	XP_006827931.2protein DETOXIFICATION 27 isoform X1	P:GO:0042908; P:GO:0055085; F:GO:0015297; F:GO:0042910; C:GO:0016021	P:xenobiotic transport; P:transmembrane transport; F:antiporter activity; F:xenobiotic transmembrane transporter activity; C:integral component of membrane			108.811	-1.19098	0.000855561	0.00863349	7.709	5.487	5.997	13.324	17.074	15.168
TRINITY_DN211978_c1_g5	Amborella trichopoda	XP_006857561.1actin-related protein 8 isoform X1	P:GO:0009653; C:GO:0005634; C:GO:0005869	P:anatomical structure morphogenesis; C:nucleus; C:dynactin complex			196.422	-1.04281	0.00106772	0.0103239	5.971	8.721	9.024	14.865	14.627	15.865
TRINITY_DN211136_c0_g1	Amborella trichopoda	RWR83043.1Glycosyl transferase	F:GO:0016740; C:GO:0016020; C:GO:0016021	F:transferase activity; C:membrane; C:integral component of membrane			153.834	-1.07945	0.00307915	0.0240308	3.412	3.459	3.113	6.662	7.314	5.023
TRINITY_DN213718_c0_g2	Amborella trichopoda	XP_006828135.1probably inactive leucine-rich repeat receptor-like protein kinase IMK2	P:GO:0006468; F:GO:0004672; F:GO:0005524; C:GO:0016021	P:protein phosphorylation; F:protein kinase activity; F:ATP binding; C:integral component of membrane			97.6574	-1.32534	0.00314997	0.0244588	10.972	7.526	7.396	26.451	37.245	19.702
TRINITY_DN201675_c0_g1	Amborella trichopoda	XP_006854556.1probable WRKY transcription factor protein 1					247.025	-1.2171	0.00325039	0.0250421	9.085	11.881	8.488	17.9	27.758	13.946
TRINITY_DN45509_c1_g1	Amborella trichopoda	XP_006849171.3aldehyde oxidase GLOX	C:GO:0016020; C:GO:0016021	C:membrane; C:integral component of membrane			17.4458	-3.71283	0.00518099	0.0362046	0.267	1.975	0	0.554	0.924	3.991
TRINITY_DN214342_c2_g1	Amborella trichopoda	XP_006827931.2protein DETOXIFICATION 27 isoform X1	P:GO:0042908; P:GO:0055085; F:GO:0015297; F:GO:0042910; C:GO:0016021	P:xenobiotic transport; P:transmembrane transport; F:antiporter activity; F:xenobiotic transmembrane transporter activity; C:integral component of membrane			17.2798	-2.88711	0.00617968	0.041829	0.778	0	2.558	7.78	3.865	17.014
TRINITY_DN184352_c0_g1	Ananas comosus	OAY78398.1Vacuolar amino acid transporter 1	C:GO:0005774; C:GO:0005886	C:vacuolar membrane; C:plasma membrane			85.5692	2.37298	2.7207e-07	8.42956e-06	6.728	8.102	12.808	1.936	1.887	1.71
TRINITY_DN205111_c6_g6	Ananas comosus	XP_020096404.1HIPL1 protein-like	C:GO:0016020	C:membrane			156.038	1.22242	0.00280744	0.0223399	15.088	32.74	35.167	9.566	8.693	9.077
TRINITY_DN215461_c8_g2	Ananas comosus	PRQ37327.1putative nucleotidyltransferase, Ribonuclease H	P:GO:0090304; F:GO:0016740; F:GO:0016787	P:nucleic acid metabolic process; F:transferase activity; F:hydrolase activity			19.3842	2.10348	0.00335012	0.0256672	1.695	3.395	1.284	0.291	0.742	0.353
TRINITY_DN213455_c0_g1	Ananas comosus	XP_020104735.1probable flavin-containing monooxygenase 1	F:GO:0016491	F:oxidoreductase activity			26.6162	-2.75305	8.44484e-05	0.00126141	0.533	1.003	0.345	2.434	2.355	4.516
TRINITY_DN192067_c0_g1	Ananas comosus	OAY84912.1putative glycerol-3-phosphate dehydrogenase (NAD(+)) 1, cytosolic	P:GO:0005975; P:GO:0006116; P:GO:0046168; F:GO:0004367; F:GO:0051287; C:GO:0005829; C:GO:0009331	P:carbohydrate metabolic process; P:NADH oxidation; P:glycerol-3-phosphate catabolic process; F:glycerol-3-phosphate dehydrogenase [NAD+] activity; F:NAD binding; C:cytosol; C:glycerol-3-phosphate dehydrogenase complex	EC:1.1.1.8; EC:1.1.1.94	Glycerol-3-phosphate dehydrogenase (NAD(+)); Glycerol-3-phosphate dehydrogenase (NAD(P)(+))	173.02	-1.06622	0.000409001	0.00470939	6.089	6.864	5.872	14.104	16.866	12.398
TRINITY_DN212855_c2_g3	Ananas comosus	XP_020107703.1probable proline transporter 2 isoform X1	C:GO:0005886; C:GO:0016021	C:plasma membrane; C:integral component of membrane			11.7962	-3.07938	0.00536648	0.0372841	0.427	0	0	1.391	1.236	1.991
TRINITY_DN165248_c0_g1	Ananas comosus	XP_020105559.1O-acyltransferase WSD1-like	P:GO:0019432; F:GO:0004144; F:GO:0047196; C:GO:0005886; C:GO:0016021	P:triglyceride biosynthetic process; F:diacylglycerol O-acyltransferase activity; F:long-chain-alcohol O-fatty-acyltransferase activity; C:plasma membrane; C:integral component of membrane	EC:2.3.1.20; EC:2.3.1.75	Diacylglycerol O-acyltransferase; Long-chain-alcohol O-fatty-acyltransferase	13.3779	-2.35528	0.00758233	0.0494924	0.618	0.929	0.881	2.65	4.386	3.575
TRINITY_DN194629_c0_g1	Angomonas deanei	EPY29912.1tubulin beta	P:GO:0000226; P:GO:0000278; F:GO:0005200; F:GO:0005525; C:GO:0005737; C:GO:0005874	P:microtubule cytoskeleton organization; P:mitotic cell cycle; F:structural constituent of cytoskeleton; F:GTP binding; C:cytoplasm; C:microtubule			21.4951	1.79036	0.0056314	0.0388839	4.393	3.587	5.403	1.926	0.989	1.24
TRINITY_DN214195_c0_g4	Apostasia shenzhenica	PKA67027.1Subtilisin-like protease	F:GO:0008236	F:serine-type peptidase activity			26.1184	7.49209	3.15441e-08	1.22072e-06	14.673	0.438	9.915	0	0	0.172
TRINITY_DN203476_c0_g2	Apostasia shenzhenica	XP_020241299.1putative ATPase N2B isoform X1	F:GO:0005524; F:GO:0016887; C:GO:0005737; C:GO:0005739	F:ATP binding; F:ATPase activity; C:cytoplasm; C:mitochondrion			42.9302	-2.46643	3.51769e-06	8.00728e-05	0.597	0.512	0.45	3.082	2.121	2.679
TRINITY_DN215361_c6_g2	Aquilegia coerulea	XP_020533354.1pentatricopeptide repeat-containing protein At4g16470 isoform X1	P:GO:0009157; P:GO:0046104; F:GO:0004797; F:GO:0005524; F:GO:0008270	P:deoxyribonucleoside monophosphate biosynthetic process; P:thymidine metabolic process; F:thymidine kinase activity; F:ATP binding; F:zinc ion binding			132.116	2.20254	3.11595e-11	2.23208e-09	24.173	17.187	25.693	5.215	4.321	5.077
TRINITY_DN206535_c1_g2	Aquilegia coerulea	XP_017226826.1 oligopeptide transporter 1-like	P:GO:0055085; C:GO:0016020; C:GO:0016021	P:transmembrane transport; C:membrane; C:integral component of membrane			34.4635	3.95921	7.96015e-10	4.29491e-08	4.287	1.494	3.765	0.395	0.156	0.299
TRINITY_DN191632_c0_g1	Aquilegia coerulea	XP_010245983.1 cyclin-dependent kinase inhibitor 5	P:GO:0048523	P:negative regulation of cellular process			504.658	1.24422	0.000181176	0.00240529	49.232	57.527	62.115	20.278	17.894	31.34
TRINITY_DN210908_c1_g1	Aquilegia coerulea	XP_027187198.1protein DMR6-LIKE OXYGENASE 1 isoform X2	F:GO:0051213	F:dioxygenase activity			37.6506	3.53277	0.000442291	0.00502736	4.532	2.306	8.344	0.667	1.145	0
TRINITY_DN208397_c0_g3	Aquilegia coerulea	XP_016203483.1cysteine-rich receptor-like protein kinase 3	P:GO:0006468; F:GO:0004672; C:GO:0016020	P:protein phosphorylation; F:protein kinase activity; C:membrane			13.0675	2.85758	0.00099353	0.00973521	1.365	5.957	1.82	0.254	0.143	0.217
TRINITY_DN213812_c0_g1	Aquilegia coerulea	PSS00188.1GDSL esterase/lipase	F:GO:0016788; C:GO:0016020; C:GO:0016021	F:hydrolase activity, acting on ester bonds; C:membrane; C:integral component of membrane			386.422	-2.78058	6.69913e-13	5.78324e-11	7.272	6.053	11.505	69.816	65.693	42.987
TRINITY_DN212897_c0_g1	Aquilegia coerulea	RDY10817.1putative pectinesterase/pectinesterase inhibitor 41	P:GO:0042545; P:GO:0043086; P:GO:0045490; F:GO:0004857; F:GO:0016787; F:GO:0030599; F:GO:0045330; C:GO:0016020; C:GO:0016021	P:cell wall modification; P:negative regulation of catalytic activity; P:pectin catabolic process; F:enzyme inhibitor activity; F:hydrolase activity; F:pectinesterase activity; F:aspartyl esterase activity; C:membrane; C:integral component of membrane			127.828	-1.60499	8.79137e-06	0.000177877	19.514	21.649	26.009	58.033	56.714	81.648
TRINITY_DN197515_c0_g1	Aquilegia coerulea	KHN29972.1 Ribosome maturation factor RimP	P:GO:0006807; P:GO:0016310; P:GO:0042274; P:GO:0044238; P:GO:0044260; P:GO:0050794; F:GO:0016301; F:GO:0097159; F:GO:1901363; C:GO:0005694; C:GO:0005737; C:GO:0012505; C:GO:0016020; C:GO:0043231	P:nitrogen compound metabolic process; P:phosphorylation; P:ribosomal small subunit biogenesis; P:primary metabolic process; P:cellular macromolecule metabolic process; P:regulation of cellular process; F:kinase activity; F:organic cyclic compound binding; F:heterocyclic compound binding; C:chromosome; C:cytoplasm; C:endomembrane system; C:membrane; C:intracellular membrane-bounded organelle			102.498	-1.03686	0.00433548	0.0314313	6.92	7.611	4.493	10.891	11.283	12.326
TRINITY_DN215098_c1_g1	Arabidopsis thaliana	AAL67129.1putative ABC transporter protein	F:GO:0005524; F:GO:0016887; C:GO:0016021	F:ATP binding; F:ATPase activity; C:integral component of membrane	EC:3.6.1.3; EC:3.6.1.15	Adenosinetriphosphatase; Nucleoside-triphosphate phosphatase	153.93	1.70881	5.08034e-05	0.000809106	21.06	7.238	27.532	5.535	3.11	6.643
TRINITY_DN208064_c1_g4	Arabidopsis thaliana	NP_564731.1MATE efflux family protein	P:GO:0006970; P:GO:0009408; P:GO:0009646; P:GO:0009737; P:GO:0010015; P:GO:0034755; P:GO:0042908; P:GO:0055072; P:GO:1905428; F:GO:0005381; F:GO:0015297; F:GO:0042910; C:GO:0005770; C:GO:0016021; C:GO:0017119	P:response to osmotic stress; P:response to heat; P:response to absence of light; P:response to abscisic acid; P:root morphogenesis; P:iron ion transmembrane transport; P:xenobiotic transport; P:iron ion homeostasis; P:regulation of plant organ formation; F:iron ion transmembrane transporter activity; F:antiporter activity; F:xenobiotic transmembrane transporter activity; C:late endosome; C:integ…			41.8477	1.99013	0.00012458	0.00175496	23.758	21.061	25.606	4.914	7.899	4.815
TRINITY_DN214135_c3_g3	Arachis duranensis	XP_015973139.1UPF0481 protein At3g47200-like	C:GO:0016020; C:GO:0016021	C:membrane; C:integral component of membrane			18.4527	2.6183	0.000152522	0.00207061	5.907	1.43	6.533	1.062	0.768	1.104
TRINITY_DN213928_c0_g1	Arachis hypogaea/Arachis ipaensis	XP_025633996.1 cyclin-U2-1-like	P:GO:0000079; F:GO:0019901	P:regulation of cyclin-dependent protein serine/threonine kinase activity; F:protein kinase binding			51.2786	1.47406	0.000739792	0.00770647	4.681	4.505	6.438	2.048	1.887	1.937
TRINITY_DN206018_c0_g2	Arachis ipaensis	XP_016168642.1ABC transporter C family member 10	P:GO:0055085; F:GO:0000166; F:GO:0016491; F:GO:0042626; C:GO:0000325; C:GO:0005774	P:transmembrane transport; F:nucleotide binding; F:oxidoreductase activity; F:ATPase-coupled transmembrane transporter activity; C:plant-type vacuole; C:vacuolar membrane			159.41	-1.96232	0.000810409	0.00827316	20.974	23.623	27.867	62.412	141.55	45.675
TRINITY_DN215217_c1_g2	Artemisia annua	RVW13148.1Transposon TX1 uncharacterized 149 kDa protein	P:GO:0006281; P:GO:0006623; P:GO:0071985; P:GO:0090305; F:GO:0003677; F:GO:0004519; F:GO:0036313; F:GO:1905394; C:GO:0005768; C:GO:0005829; C:GO:0016020; C:GO:0016021	P:DNA repair; P:protein targeting to vacuole; P:multivesicular body sorting pathway; P:nucleic acid phosphodiester bond hydrolysis; F:DNA binding; F:endonuclease activity; F:phosphatidylinositol 3-kinase catalytic subunit binding; F:retromer complex binding; C:endosome; C:cytosol; C:membrane; C:integral component of membrane			114.991	2.72729	1.02784e-10	6.70643e-09	6.867	9.8	7.127	1.776	0.495	1.213
TRINITY_DN214692_c0_g1	Artemisia annua	PWA86611.1gag-pol polyprotein	P:GO:0006508; P:GO:0015074; F:GO:0003676; F:GO:0004190; F:GO:0008270; C:GO:0005739	P:proteolysis; P:DNA integration; F:nucleic acid binding; F:aspartic-type endopeptidase activity; F:zinc ion binding; C:mitochondrion			362.354	1.84961	2.14412e-10	1.30304e-08	24.834	22.118	29.572	9.303	8.394	7.33
TRINITY_DN205439_c0_g1	Artemisia annua	PWA45943.1integrase-type DNA-binding superfamily protein	P:GO:0006355; F:GO:0003677; F:GO:0003700; C:GO:0005634	P:regulation of transcription, DNA-templated; F:DNA binding; F:DNA-binding transcription factor activity; C:nucleus			203.441	1.31099	8.66362e-06	0.000175927	18.597	20.72	22.56	10.947	7.847	8.76
TRINITY_DN208397_c0_g8	Artemisia annua	XP_008813262.1cold-responsive protein kinase 1-like	F:GO:0016740; C:GO:0110165	F:transferase activity; C:cellular anatomical entity			18.0217	4.13178	8.70065e-05	0.00129046	32.896	28.801	21.497	1.485	2.876	0
TRINITY_DN199335_c0_g1	Artemisia annua	PWA77592.1beta galactosidase 1	F:GO:0004565; C:GO:0005618; C:GO:0005773	F:beta-galactosidase activity; C:cell wall; C:vacuole	EC:3.2.1.23	Beta-galactosidase	52.2089	-1.33495	0.00219552	0.0183884	10.002	9.212	12.157	22.683	31.194	25.647
TRINITY_DN200720_c1_g1	Artemisia annua	PWA99549.1homeodomain-like protein	P:GO:0030154; F:GO:0000976; C:GO:0005634	P:cell differentiation; F:transcription regulatory region sequence-specific DNA binding; C:nucleus			204.95	-1.02341	0.00248828	0.0203734	11.665	17.635	13.086	22.129	17.399	31.991
TRINITY_DN212044_c2_g1	Asparagus officinalis	XP_020251524.1lipid phosphate phosphatase epsilon 2, chloroplastic-like isoform X1	P:GO:0008152; P:GO:0009987; F:GO:0016787; C:GO:0016020	P:metabolic process; P:cellular process; F:hydrolase activity; C:membrane			87.7129	5.7193	1.69226e-18	2.96746e-16	29.185	10.547	18.814	0.47	0.794	0.136
TRINITY_DN211062_c0_g1	Asparagus officinalis	PNX55598.1ribonuclease H	P:GO:0006278; P:GO:0032259; P:GO:0090502; F:GO:0003676; F:GO:0003964; F:GO:0004523; F:GO:0008168; F:GO:0008270; F:GO:0016740; F:GO:0016779; C:GO:0016020; C:GO:0016021	P:RNA-dependent DNA biosynthetic process; P:methylation; P:RNA phosphodiester bond hydrolysis, endonucleolytic; F:nucleic acid binding; F:RNA-directed DNA polymerase activity; F:RNA-DNA hybrid ribonuclease activity; F:methyltransferase activity; F:zinc ion binding; F:transferase activity; F:nucleotidyltransferase activity; C:membrane; C:integral component of membrane			62.5063	2.13679	1.86894e-05	0.000341604	2.346	1.932	6.955	0.752	0.455	0.878
TRINITY_DN199878_c0_g1	Asparagus officinalis	XP_020252456.1probable glutamate carboxypeptidase 2	P:GO:0006508; F:GO:0004180	P:proteolysis; F:carboxypeptidase activity			50.9147	1.59043	0.00448024	0.0321759	14.875	14.176	21.506	5.422	3.279	9.059
TRINITY_DN213855_c1_g1	Asparagus officinalis	XP_020276986.1 oligopeptide transporter 7-like	P:GO:0055085; F:GO:0035673; C:GO:0005887	P:transmembrane transport; F:oligopeptide transmembrane transporter activity; C:integral component of plasma membrane			410.687	-2.82628	1.72455e-16	2.50268e-14	5.46	8.433	5.729	34.579	44.051	31.412
TRINITY_DN212782_c0_g2	Asparagus officinalis	XP_020273598.1probable proline transporter 2 isoform X1	P:GO:0006865; C:GO:0005886; C:GO:0016021	P:amino acid transport; C:plasma membrane; C:integral component of membrane			167.137	-1.58009	0.00123402	0.0115472	3.53	3.907	9.685	19.207	12.584	27.955
TRINITY_DN215265_c1_g5	Asparagus officinalis	XP_020263389.1G-type lectin S-receptor-like serine/threonine-protein kinase At1g34300	P:GO:0016310; F:GO:0000166; F:GO:0004672; C:GO:0016020	P:phosphorylation; F:nucleotide binding; F:protein kinase activity; C:membrane			20.2062	-1.90944	0.0039882	0.029485	0.917	0.918	1.063	3.721	3.735	3.348
TRINITY_DN209298_c1_g1	Aspergillus fumigatus A1163/Aspergillus fumigatus Af293	XP_750288.1mitochondrial ADP,ATP carrier protein (Ant), putative	P:GO:0140021; P:GO:1990544; F:GO:0005471; C:GO:0005743; C:GO:0016021	P:mitochondrial ADP transmembrane transport; P:mitochondrial ATP transmembrane transport; F:ATP:ADP antiporter activity; C:mitochondrial inner membrane; C:integral component of membrane			16.3778	3.3904	0.000213798	0.00275369	5.14	2.071	3.861	0.742	0.664	0.109
TRINITY_DN200058_c0_g1	Aspergillus lentulus	XP_662849.1predicted protein					19.3182	5.50772	3.02603e-06	7.02624e-05	21.134	2.413	30.013	1.785	0	0
TRINITY_DN203955_c1_g1	Aureobasidium melanogenum CBS 110374	KEQ65030.1mannitol dehydrogenase	P:GO:0005975; P:GO:0055114; F:GO:0004553; F:GO:0008061; F:GO:0050664	P:carbohydrate metabolic process; P:oxidation-reduction process; F:hydrolase activity, hydrolyzing O-glycosyl compounds; F:chitin binding; F:oxidoreductase activity, acting on NAD(P)H, oxygen as acceptor			6.20202	6.38711	0.0003213	0.0038717	2.367	0.352	2.309	0	0	0
TRINITY_DN206142_c0_g1	Aureobasidium melanogenum CBS 110374/Aureobasidium pullulans EXF-150/Aureobasidium subglaciale EXF-2481	KEQ65229.1 ATP-dependent RNA helicase eIF4A	P:GO:0002183; F:GO:0003724; F:GO:0003743; F:GO:0005524; C:GO:0010494	P:cytoplasmic translational initiation; F:RNA helicase activity; F:translation initiation factor activity; F:ATP binding; C:cytoplasmic stress granule	EC:3.6.1.3; EC:3.6.4.13; EC:3.6.1.15	Adenosinetriphosphatase; RNA helicase; Nucleoside-triphosphate phosphatase	7.79336	3.67798	0.00300574	0.0235671	0.917	0.427	2.184	0.188	0.078	0.081
TRINITY_DN194835_c0_g1	Aureobasidium melanogenum CBS 110374/Aureobasidium pullulans/Aureobasidium pullulans EXF-150/Aureobasidium subglaciale EXF-2481	KEQ61803.1 ribosomal protein S3Ae	P:GO:0006412; F:GO:0003735; C:GO:0022627	P:translation; F:structural constituent of ribosome; C:cytosolic small ribosomal subunit			4.75802	4.98422	0.00536587	0.0372841	2.005	0.576	1.676	0	0.143	0
TRINITY_DN209573_c0_g2	Aureobasidium pullulans	OBW69797.1Dolichol-phosphate mannosyltransferase					5.40916	6.18462	0.00101763	0.00993667	0.81	0.171	1.475	0	0	0
TRINITY_DN198546_c2_g1	Aureobasidium pullulans	KEQ87154.1family A G protein-coupled receptor-like protein	P:GO:0034220; F:GO:0005216; C:GO:0016021	P:ion transmembrane transport; F:ion channel activity; C:integral component of membrane			8.58784	4.89388	0.00113251	0.0107893	2.154	0.288	2.903	0.348	0	0
TRINITY_DN181413_c0_g1	Aureobasidium pullulans	KEQ85608.1Ca2+/calmodulin-dependent protein kinase	P:GO:0006468; F:GO:0004672; F:GO:0005524	P:protein phosphorylation; F:protein kinase activity; F:ATP binding			3.92582	5.72781	0.00523482	0.0365251	0.821	0.128	0.738	0	0	0
TRINITY_DN207436_c0_g1	Aureobasidium pullulans EXF-150	OBW65413.1Peptide transport protein PTR2					22.1216	3.6033	9.94252e-07	2.63994e-05	8.157	1.58	12.933	0.864	0.924	0.57
TRINITY_DN212944_c0_g1	Aureobasidium pullulans EXF-150	KEQ89156.1hypothetical protein M438DRAFT_340974					23.1711	4.32173	5.79888e-06	0.000123567	3.647	0.854	6.38	0.432	0	0.317
TRINITY_DN208848_c0_g1	Aureobasidium pullulans EXF-150	KEQ83724.1hypothetical protein M438DRAFT_20672	F:GO:0005199; C:GO:0005618	F:structural constituent of cell wall; C:cell wall			10.6905	7.17694	6.20043e-06	0.000130964	3.551	0.064	2.634	0	0	0
TRINITY_DN206552_c0_g1	Aureobasidium pullulans EXF-150	KEQ82198.1hypothetical protein M438DRAFT_357250	C:GO:0016021	C:integral component of membrane			10.4662	6.15079	4.77816e-05	0.000769718	1.717	0.374	1.533	0	0	0.172
TRINITY_DN207973_c1_g1	Aureobasidium pullulans EXF-150	KEQ82830.1CAT1 catalase	P:GO:0006979; P:GO:0042744; P:GO:0055114; P:GO:0098869; F:GO:0004096; F:GO:0020037; F:GO:0046872	P:response to oxidative stress; P:hydrogen peroxide catabolic process; P:oxidation-reduction process; P:cellular oxidant detoxification; F:catalase activity; F:heme binding; F:metal ion binding	EC:1.11.1.7; EC:1.11.1.6	Peroxidase; Catalase	10.8753	6.20067	5.33095e-05	0.000844227	1.429	0.246	2.73	0.085	0	0
TRINITY_DN213776_c0_g2	Aureobasidium pullulans EXF-150	KEQ83303.1MFS transporter	P:GO:0006817; P:GO:0055085; F:GO:0005315; C:GO:0016021	P:phosphate ion transport; P:transmembrane transport; F:inorganic phosphate transmembrane transporter activity; C:integral component of membrane			22.484	4.96093	0.000121579	0.00172052	0.928	1.121	6.361	0.291	0	0.063
TRINITY_DN199526_c0_g1	Aureobasidium pullulans EXF-150	PSK36731.1Polynucleotide 5'-hydroxyl-kinase grc3	P:GO:0016310; F:GO:0016301	P:phosphorylation; F:kinase activity			6.99061	6.56165	0.000140859	0.00194082	4.905	0	3.966	0	0	0
TRINITY_DN207245_c0_g1	Aureobasidium pullulans EXF-150	OBW69112.1HlyIII-domain-containing protein					7.20794	6.59728	0.000207387	0.00269728	1.024	0	2.558	0	0	0
TRINITY_DN194632_c1_g1	Aureobasidium pullulans EXF-150	OQO20305.1ATP synthase subunit 9, mitochondrial	P:GO:0015986; F:GO:0008289; F:GO:0015078; C:GO:0016021; C:GO:0045263	P:ATP synthesis coupled proton transport; F:lipid binding; F:proton transmembrane transporter activity; C:integral component of membrane; C:proton-transporting ATP synthase complex, coupling factor F(o)			7.95557	5.74644	0.00030681	0.00372601	3.21	0.608	4.416	0	0	0.181
TRINITY_DN209502_c0_g1	Aureobasidium pullulans EXF-150	KJX94420.1rds1 protein	F:GO:0005199; C:GO:0005618	F:structural constituent of cell wall; C:cell wall			8.99886	4.39748	0.000623315	0.00670472	1.941	0.747	1.37	0.085	0	0.154
TRINITY_DN202984_c0_g1	Aureobasidium pullulans EXF-150	KEQ89670.1hypothetical protein M438DRAFT_341400					9.22298	5.00732	0.000653562	0.00696453	5.054	0.171	4.847	0.489	0	0
TRINITY_DN205774_c0_g1	Aureobasidium pullulans EXF-150	KEQ86866.1GroES-like protein	P:GO:0055114; F:GO:0008270; F:GO:0016491	P:oxidation-reduction process; F:zinc ion binding; F:oxidoreductase activity			5.79704	6.28259	0.000897238	0.00896386	0.693	0.342	1.839	0	0	0
TRINITY_DN198167_c0_g1	Aureobasidium pullulans EXF-150	KEQ80928.1short chain dehydrogenase/ reductase-like protein	P:GO:0055114; F:GO:0016491	P:oxidation-reduction process; F:oxidoreductase activity			4.16026	5.8105	0.00385782	0.0287102	1.418	0.438	1.466	0	0	0
TRINITY_DN196470_c0_g1	Aureobasidium pullulans EXF-150	OBW67231.1NAD(P)-binding protein	P:GO:0000027; P:GO:0006412; F:GO:0003735; F:GO:0008097; C:GO:0022625	P:ribosomal large subunit assembly; P:translation; F:structural constituent of ribosome; F:5S rRNA binding; C:cytosolic large ribosomal subunit			5.14232	5.10763	0.00420748	0.0307417	2.218	0.107	1.102	0	0	0.127
TRINITY_DN210302_c0_g3	Aureobasidium pullulans EXF-150	KEQ80367.1hypothetical protein M438DRAFT_348860	C:GO:0016021	C:integral component of membrane			7.47954	4.67219	0.00421363	0.0307465	1.013	0.085	2.74	0.226	0	0
TRINITY_DN195650_c0_g1	Aureobasidium pullulans EXF-150	KEQ84814.1H-hydrate dehydratase	P:GO:0016310; P:GO:0046496; P:GO:0110051; F:GO:0005524; F:GO:0016301; F:GO:0047453; F:GO:0052855; C:GO:0005737	P:phosphorylation; P:nicotinamide nucleotide metabolic process; P:metabolite repair; F:ATP binding; F:kinase activity; F:ATP-dependent NAD(P)H-hydrate dehydratase activity; F:ADP-dependent NAD(P)H-hydrate dehydratase activity; C:cytoplasm	EC:4.2.1.93; EC:4.2.1.136	ATP-dependent NAD(P)H-hydrate dehydratase; ADP-dependent NAD(P)H-hydrate dehydratase	4.92906	5.03387	0.00464585	0.0332518	1.77	0.299	1.169	0.132	0	0
TRINITY_DN210468_c0_g3	Aureobasidium pullulans/Aureobasidium pullulans EXF-150	KEQ89394.1aldehyde dehydrogenase, allergen Cla h 10	P:GO:0006068; P:GO:0055114; F:GO:0004029; F:GO:0043878; C:GO:0005737	P:ethanol catabolic process; P:oxidation-reduction process; F:aldehyde dehydrogenase (NAD+) activity; F:glyceraldehyde-3-phosphate dehydrogenase (NAD+) (non-phosphorylating) activity; C:cytoplasm	EC:1.2.1.5; EC:1.2.1.3	Aldehyde dehydrogenase (NAD(P)(+)); Aldehyde dehydrogenase (NAD(+))	9.7798	6.04479	9.80251e-05	0.00142994	2.559	0	2.644	0.094	0	0
TRINITY_DN199624_c0_g1	Aureobasidium pullulans/Aureobasidium pullulans EXF-150	KEQ86536.1GPI-anchored cell wall organization protein Ecm33					10.0729	4.55949	0.000548625	0.00604253	1.109	0.192	2.778	0.085	0	0.163
TRINITY_DN208546_c0_g1	Aureobasidium pullulans/Aureobasidium pullulans EXF-150	KEQ80444.1DUF706-domain-containing protein	P:GO:0019310; P:GO:0055114; F:GO:0005506; F:GO:0050113; C:GO:0005737	P:inositol catabolic process; P:oxidation-reduction process; F:iron ion binding; F:inositol oxygenase activity; C:cytoplasm	EC:1.13.99.1	Inositol oxygenase	5.87109	5.29588	0.00186682	0.0161491	1.887	0.267	1.332	0.122	0	0
TRINITY_DN203773_c0_g1	Aureobasidium pullulans/Aureobasidium pullulans EXF-150	KEQ84890.12-epi-5-epi-valiolone synthase-like protein					16.143	4.14696	0.00290681	0.0229195	3.935	0.331	2.213	0.526	0	0
TRINITY_DN187986_c0_g1	Aureobasidium pullulans/Aureobasidium pullulans EXF-150	KEQ89895.1Asp-domain-containing protein	P:GO:0006508; F:GO:0004190; C:GO:0000324	P:proteolysis; F:aspartic-type endopeptidase activity; C:fungal-type vacuole	EC:3.4.23	Acting on peptide bonds (peptidases)	4.23698	5.8353	0.00356194	0.0269128	1.045	0.085	1.284	0	0	0
TRINITY_DN211903_c0_g2	Beta vulgaris subsp. vulgaris	PRQ26177.1putative RNA-directed DNA polymerase	P:GO:0006278; P:GO:0090502; F:GO:0003676; F:GO:0003964; F:GO:0004523; F:GO:0016740; F:GO:0016779; C:GO:0016020; C:GO:0016021	P:RNA-dependent DNA biosynthetic process; P:RNA phosphodiester bond hydrolysis, endonucleolytic; F:nucleic acid binding; F:RNA-directed DNA polymerase activity; F:RNA-DNA hybrid ribonuclease activity; F:transferase activity; F:nucleotidyltransferase activity; C:membrane; C:integral component of membrane			38.209	3.13134	1.37527e-06	3.54536e-05	6.025	0.085	3.094	0.46	0.338	0.615
TRINITY_DN209053_c1_g4	Beta vulgaris subsp. vulgaris	XP_010671285.1 UNC93-like protein 1	P:GO:0055085; F:GO:0022857; C:GO:0016021	P:transmembrane transport; F:transmembrane transporter activity; C:integral component of membrane			45.8805	1.38315	0.00159666	0.014259	13.99	6.138	14.465	6.343	4.581	5.701
TRINITY_DN213180_c3_g3	Beta vulgaris subsp. vulgaris	RHN49886.1 putative ribonuclease H	P:GO:0090502; F:GO:0003676; F:GO:0004523; C:GO:0005634	P:RNA phosphodiester bond hydrolysis, endonucleolytic; F:nucleic acid binding; F:RNA-DNA hybrid ribonuclease activity; C:nucleus			75.1073	1.90029	0.00219235	0.0183884	3.252	1.441	6.677	2.105	0.69	1.267
TRINITY_DN212143_c1_g1	Brachypodium distachyon	XP_003573449.1protein TPR2	P:GO:0006355	P:regulation of transcription, DNA-templated			197.723	1.35497	7.30738e-06	0.000150935	29.782	33.177	27.714	9.143	12.194	8.824
TRINITY_DN214967_c2_g6	Brachypodium distachyon	XP_003579270.1potassium transporter 6	P:GO:0071805; F:GO:0015079; C:GO:0016021	P:potassium ion transmembrane transport; F:potassium ion transmembrane transporter activity; C:integral component of membrane			17.3742	2.41995	0.000718444	0.00753981	5.428	4.91	6.754	0.761	1.353	1.774
TRINITY_DN177219_c0_g1	Brassica cretica	RQL93130.1hypothetical protein DY000_00019393	P:GO:0090502; F:GO:0003676; F:GO:0004523	P:RNA phosphodiester bond hydrolysis, endonucleolytic; F:nucleic acid binding; F:RNA-DNA hybrid ribonuclease activity			15.3127	4.76157	2.9101e-06	6.79454e-05	1.685	1.484	1.868	0.056	0.052	0.09
TRINITY_DN203644_c0_g1	Brassica cretica	KZV44464.1lysosomal beta glucosidase-like	P:GO:0009251; F:GO:0008422	P:glucan catabolic process; F:beta-glucosidase activity	EC:3.2.1.21	Beta-glucosidase	18.6895	-2.04156	0.0058476	0.0400972	1.717	2.551	1.954	4.661	8.537	10.027
TRINITY_DN200864_c1_g2	Brassica napus	CDY07708.1BnaA03g18030D	C:GO:0016021	C:integral component of membrane			95.0901	2.08398	2.53021e-08	1.01413e-06	24.28	25.097	23.001	6.737	4.047	5.294
TRINITY_DN207477_c3_g2	Brassica napus	XP_013679761.1uncharacterized protein LOC106384322					14.6959	2.30367	0.00303591	0.023774	1.184	3.096	1.906	0.291	0.26	0.371
TRINITY_DN213873_c1_g4	Brassica oleracea	XP_009125728.1 alpha-galactosidase 1	P:GO:0005975; F:GO:0052692; C:GO:0009505; C:GO:0016021	P:carbohydrate metabolic process; F:raffinose alpha-galactosidase activity; C:plant-type cell wall; C:integral component of membrane	EC:3.2.1.22	Alpha-galactosidase	708.003	-1.85898	2.66655e-06	6.33128e-05	49.978	130.244	56.702	199.789	112.491	277.724
TRINITY_DN213479_c1_g1	Brassica oleracea var. oleracea	PNX80752.1ribonuclease H	F:GO:0003824	F:catalytic activity			49.5414	1.34157	0.00442214	0.0318402	5.513	5.284	6.313	2.396	2.173	3.285
TRINITY_DN207427_c1_g1	Cajanus cajan	KYP74877.1Retrovirus-related Pol polyprotein from transposon TNT 1-94	P:GO:0006952; P:GO:0015074; P:GO:0055114; F:GO:0000166; F:GO:0003676; F:GO:0005506; F:GO:0008270; F:GO:0016705; F:GO:0020037; F:GO:0043531	P:defense response; P:DNA integration; P:oxidation-reduction process; F:nucleotide binding; F:nucleic acid binding; F:iron ion binding; F:zinc ion binding; F:oxidoreductase activity, acting on paired donors, with incorporation or reduction of molecular oxygen; F:heme binding; F:ADP binding			50.9638	2.20905	4.90854e-05	0.000788458	2.975	1.1	1.954	0.197	0.312	0.778
TRINITY_DN183029_c0_g1	Cajanus cajan	KYP73629.1Ubiquitin carboxyl-terminal hydrolase 13	P:GO:0006511; P:GO:0016579; P:GO:0031647; F:GO:0004197; F:GO:0004843; C:GO:0005634; C:GO:0005829; C:GO:0016021	P:ubiquitin-dependent protein catabolic process; P:protein deubiquitination; P:regulation of protein stability; F:cysteine-type endopeptidase activity; F:thiol-dependent ubiquitin-specific protease activity; C:nucleus; C:cytosol; C:integral component of membrane	EC:3.4.22; EC:3.4.19.12	Acting on peptide bonds (peptidases); Ubiquitinyl hydrolase 1	11.9635	5.45234	0.00022061	0.00283061	3.668	0	0.805	0	0.078	0.072
TRINITY_DN204285_c4_g4	Cajanus cajan	KYP53032.1Retrovirus-related Pol polyprotein from transposon TNT 1-94	P:GO:0006259; F:GO:0005488; F:GO:0016491; F:GO:0016779	P:DNA metabolic process; F:binding; F:oxidoreductase activity; F:nucleotidyltransferase activity			45.5394	1.71975	0.00109014	0.0105037	7.24	9.693	18.067	5.957	4.373	3.747
TRINITY_DN215510_c4_g3	Cajanus cajan	KYP55936.1Transposon TX1 uncharacterized	P:GO:0006278; P:GO:0032774; P:GO:0090502; F:GO:0003676; F:GO:0003899; F:GO:0003964; F:GO:0004523; F:GO:0016740; F:GO:0016779; C:GO:0016020; C:GO:0016021	P:RNA-dependent DNA biosynthetic process; P:RNA biosynthetic process; P:RNA phosphodiester bond hydrolysis, endonucleolytic; F:nucleic acid binding; F:DNA-directed 5'-3' RNA polymerase activity; F:RNA-directed DNA polymerase activity; F:RNA-DNA hybrid ribonuclease activity; F:transferase activity; F:nucleotidyltransferase activity; C:membrane; C:integral component of membrane			22.1041	1.8013	0.00260041	0.0210885	9.362	8.497	10.672	2.8	3.045	2.272
TRINITY_DN211648_c0_g3	Cajanus cajan	KYP73669.1Protein GAST1					327.35	-1.77282	7.67565e-09	3.44565e-07	55.662	53.673	34.228	118.481	101.481	133.025
TRINITY_DN191542_c0_g1	Cajanus cajan	KYP77007.1Retrovirus-related Pol polyprotein from transposon TNT 1-94	P:GO:0015074; P:GO:0015696; P:GO:0055114; P:GO:0072488; F:GO:0003676; F:GO:0004491; F:GO:0008270; F:GO:0008519; F:GO:0016491; C:GO:0016020; C:GO:0016021	P:DNA integration; P:ammonium transport; P:oxidation-reduction process; P:ammonium transmembrane transport; F:nucleic acid binding; F:methylmalonate-semialdehyde dehydrogenase (acylating) activity; F:zinc ion binding; F:ammonium transmembrane transporter activity; F:oxidoreductase activity; C:membrane; C:integral component of membrane			28.7342	-2.53597	0.000108025	0.00155404	0.192	0.683	0.422	1.466	1.887	1.783
TRINITY_DN197782_c0_g1	Camelina sativa	XP_010466257.1 early nodulin-like protein 3	C:GO:0046658	C:anchored component of plasma membrane			364.521	-2.50205	1.77614e-09	9.00589e-08	7.518	15.233	8.957	32.512	63.741	38.489
TRINITY_DN214135_c3_g1	Capsella rubella	XP_006292605.1UPF0481 protein At3g47200	C:GO:0016020; C:GO:0016021	C:membrane; C:integral component of membrane			61.1452	-7.745	1.58155e-07	5.22037e-06	0.107	21.766	0	17.083	6.858	13.213
TRINITY_DN203329_c1_g7	Capsella rubella	OTF94560.1putative ubiquitin	P:GO:0006412; P:GO:0016567; P:GO:0019941; P:GO:0055085; F:GO:0003735; F:GO:0005524; F:GO:0016887; F:GO:0031386; F:GO:0031625; F:GO:0042626; C:GO:0005634; C:GO:0005737; C:GO:0005840; C:GO:0016021	P:translation; P:protein ubiquitination; P:modification-dependent protein catabolic process; P:transmembrane transport; F:structural constituent of ribosome; F:ATP binding; F:ATPase activity; F:protein tag; F:ubiquitin protein ligase binding; F:ATPase-coupled transmembrane transporter activity; C:nucleus; C:cytoplasm; C:ribosome; C:integral component of membrane	EC:3.6.1.3; EC:3.6.1.15	Adenosinetriphosphatase; Nucleoside-triphosphate phosphatase	107.252	-1.54031	0.000331606	0.00396185	54.307	93.725	45.321	119.073	155.501	126.093
TRINITY_DN204102_c0_g2	Capsicum annuum	XP_016570551.1 probable LRR receptor-like serine/threonine-protein kinase At3g47570	P:GO:0006468; F:GO:0004672; C:GO:0016020	P:protein phosphorylation; F:protein kinase activity; C:membrane			166.302	1.89693	9.03937e-05	0.00133078	69.321	38.643	40.426	15.204	7.457	19.611
TRINITY_DN206803_c0_g3	Capsicum annuum	XP_016579876.1 cytochrome P450 86B1-like	P:GO:0055114; F:GO:0004497; F:GO:0005506; F:GO:0016491; F:GO:0016705; F:GO:0020037; F:GO:0046872; C:GO:0016020; C:GO:0016021	P:oxidation-reduction process; F:monooxygenase activity; F:iron ion binding; F:oxidoreductase activity; F:oxidoreductase activity, acting on paired donors, with incorporation or reduction of molecular oxygen; F:heme binding; F:metal ion binding; C:membrane; C:integral component of membrane			114.252	-3.70045	5.0421e-07	1.4559e-05	1.695	1.409	3.42	32.427	50.506	10.688
TRINITY_DN208710_c4_g2	Capsicum annuum	PHT83804.1hypothetical protein T459_12247	F:GO:0016758	F:transferase activity, transferring hexosyl groups			39.5281	-2.33852	0.00321281	0.024855	4.692	11.71	1.322	15.871	6.923	19.349
TRINITY_DN207933_c0_g1	Capsicum baccatum	PHT34364.1Ethylene-responsive transcription factor LEP	P:GO:0006355; F:GO:0003677; F:GO:0003700; C:GO:0005634	P:regulation of transcription, DNA-templated; F:DNA binding; F:DNA-binding transcription factor activity; C:nucleus			407.734	-1.5636	5.34871e-07	1.5339e-05	9.064	8.38	12.741	33.959	35.762	27.539
TRINITY_DN209053_c0_g1	Carica papaya	XP_021909094.1UNC93-like protein 1	C:GO:0016020	C:membrane			27.8073	1.72524	0.00426047	0.0310077	10.279	3.299	7.137	3.665	1.588	2.688
TRINITY_DN196098_c0_g2	Carica papaya	XP_021888631.1zonadhesin-like isoform X2					35.9064	-3.10746	5.98477e-07	1.70164e-05	0.395	1.249	0.278	2.499	3.097	2.516
TRINITY_DN210063_c2_g1	Carica papaya	XP_021894246.1protein TPX2	C:GO:0043229	C:intracellular organelle			549.149	-1.07444	0.00604351	0.0410891	13.915	12.137	10.815	26.292	32.925	16.579
TRINITY_DN172601_c0_g3	Carthamus tinctorius/Catharanthus roseus	AEK98798.1 ubiquitin	P:GO:0016567; P:GO:0019941; F:GO:0031386; F:GO:0031625; C:GO:0005634; C:GO:0005737	P:protein ubiquitination; P:modification-dependent protein catabolic process; F:protein tag; F:ubiquitin protein ligase binding; C:nucleus; C:cytoplasm			9.16008	-3.27346	0.00684525	0.0456549	0.661	8.092	2.874	9.143	13.547	16.598
TRINITY_DN199986_c0_g2	Cephalotus follicularis	GAV64642.1HLH domain-containing protein	F:GO:0046983	F:protein dimerization activity			15.0044	3.84745	3.14437e-05	0.000533055	1.599	1.185	1.533	0.094	0.169	0.045
TRINITY_DN208469_c4_g4	Cephalotus follicularis	PKU68694.1RNA-directed DNA polymerase	P:GO:0006278; P:GO:0015074; F:GO:0003676; F:GO:0003964; F:GO:0008270	P:RNA-dependent DNA biosynthetic process; P:DNA integration; F:nucleic acid binding; F:RNA-directed DNA polymerase activity; F:zinc ion binding			45.0525	2.61227	0.000610234	0.00658505	4.532	6.544	7.932	0.78	0.351	1.919
TRINITY_DN204660_c0_g1	Cephalotus follicularis	GAV86140.1SET domain-containing protein/Sterile domain-containing protein/NAD_binding_4 domain-containing protein	P:GO:0006725; P:GO:0044238; P:GO:1901360; F:GO:0016620; C:GO:0043231	P:cellular aromatic compound metabolic process; P:primary metabolic process; P:organic cyclic compound metabolic process; F:oxidoreductase activity, acting on the aldehyde or oxo group of donors, NAD or NADP as acceptor; C:intracellular membrane-bounded organelle			612.421	-3.1507	1.9856e-09	9.94809e-08	21.038	39.817	17.703	154.911	84.576	304.883
TRINITY_DN196240_c0_g1	Cephalotus follicularis	GAV71913.1Nodulin-like domain-containing protein	C:GO:0016020; C:GO:0016021	C:membrane; C:integral component of membrane			21.9616	-2.39207	0.00290109	0.0229061	0.192	0.32	0.872	2.171	2.134	3.131
TRINITY_DN213901_c0_g2	Cercospora zeina	OBW65413.1Peptide transport protein PTR2					7.37645	3.63887	0.00569288	0.0392441	7.518	0.918	6.945	0.442	0	1.104
TRINITY_DN214528_c1_g2	Chenopodium quinoa	XP_021730175.1peroxidase 66-like	P:GO:0008152; P:GO:0009987; P:GO:0050896; F:GO:0004601; F:GO:0005488; C:GO:0009505; C:GO:0009506	P:metabolic process; P:cellular process; P:response to stimulus; F:peroxidase activity; F:binding; C:plant-type cell wall; C:plasmodesma	EC:1.11.1.7	Peroxidase	58.0134	-1.94066	0.00047071	0.00530384	7.102	6.191	2.309	17.609	19.729	20.055
TRINITY_DN199814_c0_g2	Cicer arietinum	XP_004499113.1F-box/FBD/LRR-repeat protein At1g13570-like	P:GO:0006412; F:GO:0003735; C:GO:0005840	P:translation; F:structural constituent of ribosome; C:ribosome			23.2395	2.36238	0.00032966	0.00394982	4.67	3.149	3.458	1.109	0.338	0.742
TRINITY_DN204892_c0_g3	Cicer arietinum	XP_004507789.1transcription factor IBH1-like 1	F:GO:0046983	F:protein dimerization activity			20.3401	2.3226	0.00133902	0.012358	4.766	2.85	4.665	1.541	0.56	0.697
TRINITY_DN197300_c0_g1	Cicer arietinum	KEH41204.1 ABC1/COQ8 Serine/Threonine kinase	P:GO:0006468; F:GO:0004672; F:GO:0005524; F:GO:0016787; C:GO:0009507	P:protein phosphorylation; F:protein kinase activity; F:ATP binding; F:hydrolase activity; C:chloroplast			843.377	-1.16089	2.08371e-05	0.000375317	22.787	22.342	14.935	45.103	37.922	40.96
TRINITY_DN210540_c1_g4	Cicer arietinum	XP_016508381.1 lipase-like	F:GO:0016787; C:GO:0016021	F:hydrolase activity; C:integral component of membrane			11.2198	-6.72515	4.98107e-05	0.000797066	0	14.806	0	13.24	13.625	14.534
TRINITY_DN201321_c0_g1	Cicer arietinum	XP_004498875.1beta-fructofuranosidase, insoluble isoenzyme CWINV6-like isoform X1	P:GO:0008152; F:GO:0016798	P:metabolic process; F:hydrolase activity, acting on glycosyl bonds			68.4217	-3.94123	0.000102689	0.00149022	0.757	0.576	2.031	10.627	39.354	4.86
TRINITY_DN211553_c3_g5	Cinnamomum micranthum f. kanehirae	RWR89566.1RNA-binding protein 24-B isoform X1	F:GO:0003729; C:GO:0005634; C:GO:0016021	F:mRNA binding; C:nucleus; C:integral component of membrane			81.9029	3.34634	3.97569e-13	3.55994e-11	9.394	12.233	14.101	1.56	0.742	1.104
TRINITY_DN205489_c0_g1	Cinnamomum micranthum f. kanehirae	RWR96455.1O-acyltransferase WSD1-like protein isoform X1	F:GO:0004144; C:GO:0016020	F:diacylglycerol O-acyltransferase activity; C:membrane	EC:2.3.1.20	Diacylglycerol O-acyltransferase	346.016	3.20352	3.33847e-12	2.68898e-10	61.398	19.62	33.404	4.322	3.423	9.014
TRINITY_DN183380_c0_g3	Cinnamomum micranthum f. kanehirae	RWR79951.1UBX domain-containing protein 4-like protein					203.398	11.4224	7.16841e-10	3.91796e-08	50.191	0	15.826	0	0	0
TRINITY_DN212330_c0_g5	Cinnamomum micranthum f. kanehirae	RWR85514.1AP2/ERF and B3 domain-containing protein	P:GO:0006355; F:GO:0003677	P:regulation of transcription, DNA-templated; F:DNA binding			106.596	2.05821	1.51748e-07	5.05845e-06	12.124	5.668	14.331	2.725	3.956	2.615
TRINITY_DN211260_c3_g8	Cinnamomum micranthum f. kanehirae	RWR84478.1NAC transcription factor 56-like protein isoform X2	P:GO:0006355; P:GO:0048731; F:GO:0003677; C:GO:0005634	P:regulation of transcription, DNA-templated; P:system development; F:DNA binding; C:nucleus			246.436	2.36659	1.59626e-07	5.25861e-06	21.838	30.263	35.033	4.539	3.058	7.846
TRINITY_DN207072_c0_g1	Cinnamomum micranthum f. kanehirae	RWR78472.1DNA ligase 1-like protein	F:GO:0016874; C:GO:0016020; C:GO:0016021	F:ligase activity; C:membrane; C:integral component of membrane			294.437	2.67896	1.54916e-06	3.94532e-05	24.248	19.652	15.366	2.124	5.088	1.783
TRINITY_DN211250_c3_g2	Cinnamomum micranthum f. kanehirae	RWR80794.1oligopeptide transporter 7-like protein	P:GO:0035672; F:GO:0035673; C:GO:0005887	P:oligopeptide transmembrane transport; F:oligopeptide transmembrane transporter activity; C:integral component of plasma membrane			90.4777	2.21846	1.73375e-06	4.36713e-05	33.013	34.01	41.509	7.226	10.684	5.177
TRINITY_DN199201_c0_g2	Cinnamomum micranthum f. kanehirae	RWR77369.1RNA polymerase II transcription mediator	C:GO:0005634	C:nucleus			33.0198	2.94476	2.32055e-06	5.6046e-05	6.803	5.028	5.039	0.771	0.39	1.176
TRINITY_DN214679_c1_g4	Cinnamomum micranthum f. kanehirae	RWR96455.1O-acyltransferase WSD1-like protein isoform X1	F:GO:0016746; C:GO:0016020	F:transferase activity, transferring acyl groups; C:membrane			656.605	1.75474	2.78006e-06	6.5454e-05	257.856	203.42	290.226	68.463	49.374	111.251
TRINITY_DN212150_c0_g1	Cinnamomum micranthum f. kanehirae	RWR79091.1DUF1191 domain-containing protein	C:GO:0016020; C:GO:0016021	C:membrane; C:integral component of membrane			22.5287	3.65561	3.23343e-06	7.41575e-05	2.762	1.687	3.774	0.254	0.143	0.452
TRINITY_DN205510_c2_g3	Cinnamomum micranthum f. kanehirae	RWR95914.1protein BIG GRAIN 1-like protein B	P:GO:0009734	P:auxin-activated signaling pathway			367.65	1.30019	9.64994e-06	0.000191791	27.266	30.466	22.119	12.244	8.498	8.941
TRINITY_DN214604_c2_g1	Cinnamomum micranthum f. kanehirae	RWR78736.1putative acyl-activating enzyme 5, peroxisomal	F:GO:0016874	F:ligase activity			821.176	1.31746	3.10954e-05	0.000528019	85.007	72.802	66.234	33.245	29.268	20.905
TRINITY_DN206517_c4_g1	Cinnamomum micranthum f. kanehirae	RWR95151.1putative polygalacturonase isoform X2	P:GO:0005975; P:GO:0071555; F:GO:0004650; F:GO:0047911; C:GO:0005576; C:GO:0005773	P:carbohydrate metabolic process; P:cell wall organization; F:polygalacturonase activity; F:galacturan 1,4-alpha-galacturonidase activity; C:extracellular region; C:vacuole	EC:3.2.1.67; EC:3.2.1.15	Galacturonan 1,4-alpha-galacturonidase; Endo-polygalacturonase	116.341	1.39633	5.33748e-05	0.000844466	11.356	12.351	8.967	3.524	4.099	4.525
TRINITY_DN190754_c1_g3	Cinnamomum micranthum f. kanehirae	RWR74434.1GDP-mannose transporter GONST3-like protein	P:GO:0006376; P:GO:0015783; F:GO:0003729; F:GO:0005457; F:GO:0015297; C:GO:0005685; C:GO:0005794; C:GO:0016021	P:mRNA splice site selection; P:GDP-fucose transmembrane transport; F:mRNA binding; F:GDP-fucose transmembrane transporter activity; F:antiporter activity; C:U1 snRNP; C:Golgi apparatus; C:integral component of membrane			24.9499	2.80692	6.38582e-05	0.000987969	4.052	0.374	1.753	0.423	0.351	0.425
TRINITY_DN211310_c1_g1	Cinnamomum micranthum f. kanehirae	RWR73334.1Protein kinase domain-containing protein	F:GO:0097159; F:GO:1901363; C:GO:0016020	F:organic cyclic compound binding; F:heterocyclic compound binding; C:membrane			81.4452	1.57837	7.32307e-05	0.00110761	6.451	6.747	4.809	1.738	1.405	2.416
TRINITY_DN194565_c0_g2	Cinnamomum micranthum f. kanehirae	RWR90950.1G-type lectin S-receptor-like serine/threonine-protein kinase	P:GO:0009987; F:GO:0005488; F:GO:0016301	P:cellular process; F:binding; F:kinase activity			9.48302	5.06916	0.000960887	0.00945675	0.363	0.961	1.657	0.047	0	0.045
TRINITY_DN207344_c0_g1	Cinnamomum micranthum f. kanehirae	RWR73461.1putative xyloglucan endotransglucosylase/hydrolase protein 26	P:GO:0006073; P:GO:0071554; P:GO:0071840; F:GO:0016757; F:GO:0016798; C:GO:0005576; C:GO:0016020	P:cellular glucan metabolic process; P:cell wall organization or biogenesis; P:cellular component organization or biogenesis; F:transferase activity, transferring glycosyl groups; F:hydrolase activity, acting on glycosyl bonds; C:extracellular region; C:membrane			15.6839	2.74773	0.000988858	0.00970072	3.913	6.501	3.928	0.846	0.534	0.217
TRINITY_DN206491_c0_g2	Cinnamomum micranthum f. kanehirae	XP_012092994.1aluminum-activated malate transporter 9	C:GO:0016020	C:membrane			67.0546	1.21169	0.00203777	0.0173339	8.626	7.75	8.449	4.172	2.434	3.783
TRINITY_DN211081_c3_g4	Cinnamomum micranthum f. kanehirae	RWR95781.1cytokinin hydroxylase-like protein	P:GO:0055114; F:GO:0004497; F:GO:0005506; F:GO:0016705; F:GO:0020037; F:GO:0046872; C:GO:0016020; C:GO:0016021	P:oxidation-reduction process; F:monooxygenase activity; F:iron ion binding; F:oxidoreductase activity, acting on paired donors, with incorporation or reduction of molecular oxygen; F:heme binding; F:metal ion binding; C:membrane; C:integral component of membrane			14.9896	2.81954	0.0021218	0.0179219	1.877	5.22	4.397	0.752	0.182	0.597
TRINITY_DN195154_c0_g1	Cinnamomum micranthum f. kanehirae	RWR88642.1auxin-responsive protein SAUR71	P:GO:0009733	P:response to auxin			307.08	1.41699	0.00286029	0.0226813	49.946	40.49	52.554	16.773	28.24	10.543
[truncated: 2,046 more rows]

## Sheet: FS3 vs FS4
Supplementary Table 2c: Transcriptome analysis of Pinus halepensis female cone development. Differentialy expressed genes in developmental stage 3 versus stage 4.
[truncated: 2,116 more rows]

## Sheet: MS2 vs MS3
Supplementary Table 2d: Transcriptome analysis of Pinus halepensis male cone development. Differentialy expressed genes in developmental stage 2 versus stage 3.
[truncated: 4,327 more rows]

[truncated: 1 more sheets: VS2 vs VS3]
